# Supplementary material for: Fragile regions and not functional constraints predominate in shaping gene organization in the genus Drosophila
Source: HighWire-hosted journal article supplement (doi:10.1101/gr.103713.109), 2010-07-02
Supplement: Supp_Dataset_S1.zip [file Dataset S1.xls]

## Sheet: GOO breaks & genes
Orthologous landmark number	Total number of 5' - end breakpoint events	Total number of 3' - end breakpoint events	Drosohila subgenus 5' - end breakpoint events	Drosohila subgenus 3' - end breakpoint events	Between subgenera 5' - end breakpoint events	Between subgenera 3' - end breakpoint events	Sophophora subgenus 5' - end breakpoint events	Sophophora subgenus 3' - end breakpoint events	Number of IGAs in OL	Number of Genes in OL	Coordinates in D. mel.			Genes (D. melanogaster CG-codes) in OL
A-telo	-	13	-	1	-	1	-	11
1	8	1	0	1	1	0	7	0	1	1	X	63574	87173	CG17131
2	1	1	1	1	0	0	0	0	1	1	X	100872	102655	CG3038
3	1	1	1	0	0	0	0	1	1	1	X	102829	110847	CG2995
4	1	4	0	0	0	0	1	4	1	2	X	112471	120817	CG2945 CG13377
5	8	1	0	0	1	0	7	1	3	3	X	164506	191621	CG12470 CG17885 CG32816
6	4	1	1	1	0	0	3	0	2	2	X	199867	218067	CG3777 CG3757
7	1	1	1	1	0	0	0	0	5	5	X	226853	320008	CG3796 CG3827 CG3839 CG13374 CG3258
8	1	1	1	1	0	0	0	0	1	1	X	323871	326155	CG3972
9	1	1	1	0	0	0	0	1	1	1	X	327874	333414	CG3923
10	6	2	1	0	2	0	3	2	2	2	X	338758	344364	CG3176 CG18273
11	1	4	0	0	0	2	1	2	2	2	X	344761	350316	CG3156 CG17896
12	6	1	2	1	2	0	2	0	1	1	X	351722	353191	CG17778
13	2	1	2	1	0	0	0	0	1	1	X	353293	365902	CG4122
14	1	6	1	0	0	0	0	6	1	3	X	366240	387113	CG18104 CG4262 CG4293
15	4	3	0	2	1	1	3	0	2	2	X	388441	454643	CG7727 CG6172
16	1	4	0	0	1	1	0	3	3	3	X	467367	479869	CG13366 CG13365 CG17828
17	2	1	0	0	0	0	2	1	2	2	X	482385	486228	CG17829 CG7622
18	4	1	1	0	0	0	3	1	1	2	X	486604	492548	CG6189 CG7486
19	1	1	0	0	0	0	1	1	1	1	X	492708	500581	CG6222
20	7	4	0	0	2	2	5	2	1	1	X	501582	503207	CG13367
21	5	6	1	0	1	1	3	5	1	2	X	504108	512863	CG16982 CG13363
22	9	3	0	0	1	1	8	2	3	4	X	543661	615544	CG5227 CG13362 CG13361 CG5254
23	6	2	1	0	0	0	5	2	2	3	X	626849	646910	CG16785 CG12311 CG13360
24	2	4	0	2	0	1	2	1	2	2	X	649989	658278	CG16989 CG7413
25	4	3	0	2	3	0	1	1	6	8	X	662893	789389	CG7359 CG12467 CG14633 CG14632 CG3711 CG3034 CG3708 CG3706
26	2	1	1	0	0	0	1	1	1	1	X	789390	791580	CG32815
27	1	1	0	0	0	0	1	1	3	4	X	792053	802593	CG11642 CG3704 CG3026 CG3703
28	1	2	0	0	0	0	1	2	3	3	X	803474	883524	CG3699 CG3690 CG11638
29	2	2	0	0	0	0	2	2	1	1	X	883678	885113	CG3021
30	2	1	0	1	0	0	2	0	3	4	X	887664	909449	CG33082 CG14630 CG3019 CG14629
31	1	1	1	1	0	0	0	0	4	4	X	930719	1032843	CG3655 CG32859 CG11378 CG11384
32	1	1	1	0	0	0	0	1	5	5	X	1037028	1059742	CG11379 CG14627 CG14626 CG11380 CG14625
33	3	6	0	0	0	1	3	5	3	3	X	1060600	1068534	CG11381 CG14624 CG11382
34	9	5	1	0	1	0	7	5	1	1	X	1093693	1096680	CG11403
35	3	5	0	0	0	0	3	5	1	1	X	1099561	1108477	CG11405
36	5	6	0	0	0	2	5	4	1	1	X	1146528	1153200	CG14622
37	5	8	0	3	2	2	3	3	1	1	X	1179346	1186275	CG11411
38	9	1	3	0	2	0	4	1	1	1	X	1186335	1190517	CG11409
39	1	1	0	0	0	0	1	1	2	3	X	1198906	1206178	CG11412 CG11418 CG11415
40	2	1	0	1	0	0	2	0	1	1	X	1206708	1210797	CG12773
41	1	2	1	0	0	0	0	2	1	1	X	1210864	1213301	CG11417
42	1	2	0	1	0	0	1	1	1	1	X	1213309	1214434	CG11420
43	2	1	1	0	0	0	1	1	1	1	X	1226181	1226874	CG14770
44	2	2	0	0	0	0	2	2	1	1	X	1227387	1231561	CG3056
45	1	2	0	0	0	2	1	0	1	2	X	1232368	1237297	CG3051 CG3719
46	1	1	0	1	1	0	0	0	1	1	X	1245480	1249672	CG32813
47	1	2	1	0	0	0	0	2	1	1	X	1249886	1254159	CG11448
48	2	3	0	0	0	0	2	3	4	4	X	1271083	1313875	CG14772 CG3064 CG18531 CG14785
49	2	11	0	3	0	3	2	5	1	1	X	1313996	1317379	CG14786
50	7	1	0	0	2	0	5	1	2	2	X	1317628	1321033	CG14787 CG14788
51	4	7	0	2	0	3	4	2	1	1	X	1321176	1323253	CG14789
52	6	4	3	0	0	0	3	4	6	6	X	1323574	1333751	CG14777 CG32808 CG14778 CG14779 CG14780 CG14791
53	8	3	2	0	0	0	6	3	2	2	X	1333915	1338243	CG14781 CG14782
54	2	2	0	0	0	0	2	2	3	3	X	1338609	1369620	CG14792 CG33513 CG14795
55	2	1	0	0	0	0	2	1	2	2	X	1408547	1517698	CG14796 CG11491
56	2	1	0	1	0	0	2	0	1	2	X	1521211	1525435	CG3093 CG3740
57	1	1	1	0	0	0	0	1	3	5	X	1525749	1552045	CG3095 CG32809 CG14797 CG3100 CG3771
58	1	8	0	1	0	1	1	6	2	2	X	1565094	1610195	CG3795 CG14808
59	1	2	0	0	0	0	1	2	2	2	X	1687478	1715107	CG14801 CG14812
60	2	1	0	0	0	0	2	1	1	1	X	1715299	1717948	CG14813
61	1	2	0	0	0	0	1	2	1	1	X	1718134	1721991	CG14814
62	4	3	0	1	1	0	3	2	1	3	X	1722065	1728507	CG14802 CG14815 CG14803
63	6	1	0	0	0	0	6	1	1	1	X	1730019	1732637	CG14804
64	1	2	0	0	0	1	1	1	1	1	X	1732861	1733354	CG14817
65	6	4	0	0	1	1	5	3	1	2	X	1733475	1735738	CG14805 CG14818
66	6	2	2	0	2	0	2	2	4	5	X	1736453	1758094	CG14806 CG3848 CG3109 CG11579 CG32803
67	4	2	0	0	0	2	4	0	1	2	X	1758308	1764412	CG32801 CG3810
68	3	2	0	0	3	0	0	2	2	3	X	1764413	1779017	CG3480 CG17766 CG3806
69	2	6	0	0	0	1	2	5	1	1	X	1779161	1783678	CG3573
70	6	2	1	0	2	2	3	0	3	3	X	1783836	1797697	CG11596 CG3857 CG3587
71	4	1	2	1	2	0	0	0	3	3	X	1849379	1865499	CG3600 CG16902 CG4406
72	1	1	1	1	0	0	0	0	1	1	X	1868480	1878814	CG4399
73	1	4	1	0	0	1	0	3	6	7	X	1881250	1921292	CG4376 CG4380 CG4325 CG4322 CG4313 CG4290 CG4281
74	6	6	0	0	0	1	6	5	1	2	X	1928569	1932020	CG4061 CG4045
75	3	8	0	1	0	2	3	5	1	2	X	1933138	1936539	CG4025 CG16903
76	8	7	0	1	2	1	6	5	2	2	X	1936768	1969820	CG3981 CG3954
77	2	3	0	1	0	1	2	1	3	4	X	1982360	2005756	CG18412 CG3835 CG3724 CG3717
78	2	3	0	0	0	0	2	3	1	1	X	2006258	2015139	CG3707
79	4	7	2	1	0	0	2	6	2	2	X	2015298	2028437	CG3656 CG3630
80	7	2	3	1	1	1	3	0	1	1	X	2029653	2031469	CG3540
81	2	2	1	1	1	1	0	0	1	2	X	2037250	2040806	CG3461 CG3460
82	3	2	0	0	3	2	0	0	4	5	X	2043978	2078615	CG3457 CG3456 CG18031 CG33548 CG3299
83	2	3	0	0	2	0	0	3	1	1	X	2080007	2080821	CG14052
84	2	5	0	1	0	1	2	3	1	2	X	2081867	2098194	CG3443 CG3228
85	4	1	0	0	1	0	3	1	3	3	X	2098260	2106137	CG3218 CG3206 CG3193
86	1	1	0	0	0	0	1	1	2	2	X	2106295	2110286	CG3191 CG3091
87	1	3	0	1	0	0	1	2	2	2	X	2110555	2118683	CG3078 CG3073
88	2	2	1	0	0	0	1	2	7	7	X	2118998	2181846	CG3071 CG2924 CG2918 CG2879 CG32798 CG2865 CG14050
89	3	2	0	0	0	0	3	2	2	2	X	2196282	2200793	CG2845 CG14048
90	1	4	0	1	0	0	1	3	4	4	X	2201289	2267055	CG2841 CG14047 CG14045 CG12496
91	2	3	0	0	0	2	2	1	6	7	X	2300320	2441855	CG32796 CG7803 CG33950 CG13758 CG8310 CG13759 CG13760
92	4	5	1	1	0	0	3	4	1	1	X	2442133	2444049	CG17437
93	5	7	0	3	1	2	4	2	1	1	X	2448279	2454761	CG9659
94	2	8	0	2	1	3	1	3	2	3	X	2460347	2466518	CG9900 CG13761 CG8636
95	8	3	0	0	2	1	6	2	2	2	X	2474497	2478301	CG10742 CG9904
96	5	2	1	0	1	0	3	2	2	2	X	2481174	2534013	CG10260 CG2621
97	3	2	0	0	0	0	3	2	2	2	X	2536430	2539088	CG2655 CG2652
98	1	1	0	0	0	0	1	1	2	3	X	2541736	2554371	CG2647 CG2650 CG2658
99	5	1	1	1	0	0	4	0	2	2	X	2554860	2559932	CG2662 CG2675
100	1	1	1	0	0	0	0	1	2	2	X	2560732	2563591	CG2677 CG2680
101	1	1	0	0	0	0	1	1	2	2	X	2564840	2570113	CG2681 CG2685
102	1	5	0	3	0	0	1	2	1	2	X	2570237	2576481	CG2694 CG2701
103	5	5	3	0	0	2	2	3	1	1	X	2580442	2582737	CG2707
104	6	4	0	0	2	1	4	3	1	1	X	2582863	2583645	CG2709
105	4	2	0	0	1	2	3	0	1	2	X	2586375	2590482	CG2713 CG2712
106	3	1	1	0	2	0	0	1	21	21	X	2590483	2829988	CG2714 CG2715 CG32795 CG2759 CG12498 CG14416 CG14418 CG14419 CG3526 CG3588 CG14424 CG32793 CG3592 CG3598 CG14420 CG14421 CG14422 CG14423 CG17959 CG3603 CG4125
107	1	1	0	0	0	0	1	1	1	1	X	2922924	2923718	CG4116
108	1	1	0	0	0	0	1	1	1	1	X	2956234	2988959	CG3653
109	3	3	0	1	0	0	3	2	2	2	X	2991028	3029278	CG3936 CG18508
110	3	2	2	0	0	0	1	2	1	1	X	3029532	3030390	CG4015
111	1	7	0	2	0	1	1	4	2	5	X	3031275	3195502	CG3939 CG32498 CG10790 CG12181 CG10793
112	4	1	1	0	0	0	3	1	2	2	X	3229339	3249570	CG10798 CG12535
113	1	1	0	0	0	0	1	1	1	1	X	3291244	3291923	CG14269
114	1	1	0	1	0	0	1	0	1	1	X	3315429	3316395	CG16782
115	1	5	1	1	0	1	0	3	4	4	X	3321893	3341530	CG12206 CG10804 CG10802 CG14270
116	5	6	1	2	1	0	3	4	3	4	X	3341809	3427916	CG10803 CG14271 CG32791 CG32792
117	2	2	1	0	0	0	1	2	1	1	X	3427917	3429776	CG2875
118	3	3	1	0	0	0	2	3	3	3	X	3430694	3517293	CG2872 CG13317 CG2864
119	1	1	0	0	0	0	1	1	2	2	X	3535090	3565367	CG13316 CG2849
120	2	10	0	2	0	1	2	7	2	2	X	3594297	3633912	CG32781 CG32782
121	3	5	0	0	1	1	2	4	2	2	X	3647794	3655746	CG32779 CG12632
122	3	2	0	1	1	0	2	1	2	2	X	3673539	3702862	CG2901 CG2904
123	3	1	2	0	0	0	1	1	2	2	X	3708200	3725533	CG2913 CG2930
124	1	2	0	0	0	0	1	2	2	2	X	3725977	3735724	CG2934 CG15239
125	2	3	0	2	0	0	2	1	4	4	X	3740264	3785243	CG32776 CG15240 CG2938 CG2941
126	4	5	3	0	0	0	1	5	1	1	X	3794213	3799342	CG5014
127	5	7	0	1	1	2	4	4	1	1	X	3810663	3813801	CG6428
128	4	1	0	0	1	0	3	1	5	5	X	3915559	3946272	CG33220 CG32790 CG32778 CG15376 CG6379
129	1	2	0	0	0	0	1	2	1	1	X	3948251	3949434	CG6358
130	2	3	0	0	0	0	2	3	5	6	X	3949581	3971984	CG4934 CG4944 CG6133 CG4865 CG6121 CG4857
131	4	1	0	1	0	0	4	0	1	1	X	3976483	3978084	CG32775
132	1	4	1	0	0	0	0	4	8	8	X	3979609	4167438	CG3665 CG15571 CG15570 CG15573 CG32774 CG3697 CG2982 CG3712
133	8	2	0	0	0	2	8	0	1	2	X	4167863	4207691	CG3620 CG12693
134	2	5	1	1	1	1	0	3	4	4	X	4211656	4385873	CG3626 CG3578 CG3556 CG11427
135	1	5	0	1	0	1	1	3	2	2	X	4386147	4389747	CG3564 CG3568
136	7	3	2	0	1	1	4	2	1	1	X	4391757	4394403	CG17592
137	4	8	0	0	1	3	3	5	1	2	X	4394404	4397117	CG15912 CG11436
138	7	2	3	0	0	0	4	2	2	2	X	4397204	4399582	CG3527 CG11444
139	6	4	0	0	1	2	5	2	2	2	X	4403309	4471460	CG3546 CG12212
140	7	5	0	0	2	1	5	4	5	6	X	4481567	4495069	CG3346 CG3081 CG3062 CG3052 CG7038 CG3024
141	5	1	0	1	2	0	3	0	1	2	X	4495258	4503245	CG7035 CG15473
142	1	6	1	1	0	2	0	3	2	2	X	4503389	4522768	CG3009 CG3000
143	3	4	0	1	1	0	2	3	1	1	X	4525637	4532108	CG2984
144	4	1	1	0	0	0	3	1	3	3	X	4547600	4573981	CG7010 CG7024 CG6986
145	1	1	0	0	0	0	1	1	2	2	X	4615793	4628201	CG2932 CG15471
146	1	1	0	0	0	1	1	0	3	3	X	4739926	4750543	CG15470 CG32771 CG32770
147	1	4	0	0	1	2	0	2	2	2	X	4752149	4760225	CG6927 CG32772
148	3	2	0	0	1	2	2	0	2	2	X	4760655	4766885	CG4041 CG6903
149	3	6	1	0	2	2	0	4	1	1	X	4771898	4781387	CG4068
150	3	1	1	0	1	0	1	1	3	3	X	4784369	4915082	CG6899 CG15468 CG6824
151	2	1	0	0	0	0	2	1	1	1	X	4919871	4929964	CG32767
152	8	5	1	1	1	0	6	4	10	10	X	4977135	5154165	CG6789 CG15465 CG5062 CG15464 CG6775 CG15786 CG3323 CG15785 CG17764 CG3319
153	4	1	1	0	0	0	3	1	2	2	X	5154484	5157125	CG4528 CG3315
154	1	1	0	0	0	0	1	1	3	4	X	5157610	5164234	CG4193 CG4198 CG15930 CG4202
155	1	4	0	1	0	0	1	3	1	1	X	5164235	5167947	CG3312
156	6	2	1	0	0	0	5	2	3	3	X	5169123	5177668	CG4206 CG3309 CG4208
157	1	1	0	0	0	0	1	1	2	2	X	5177982	5246379	CG4209 CG10706
158	2	1	0	0	0	0	2	1	2	2	X	5250469	5265573	CG3252 CG3249
159	8	2	1	0	0	1	7	1	1	1	X	5267441	5272145	CG4165
160	2	2	0	0	1	0	1	2	3	3	X	5272754	5338794	CG16756 CG15784 CG16752
161	5	1	2	0	0	0	3	1	2	2	X	5345502	5347812	CG32762 CG4151
162	1	2	0	0	0	0	1	2	1	1	X	5362498	5364007	CG12730
163	2	4	0	0	0	0	2	4	2	2	X	5374164	5457470	CG33980 CG4136
164	6	3	0	2	0	0	6	1	1	1	X	5461839	5464038	CG3208
165	4	4	1	1	0	0	3	3	1	1	X	5464371	5467795	CG3201
166	4	6	1	0	1	0	2	6	5	5	X	5472890	5507289	CG11473 CG17761 CG17758 CG15777 CG15776
167	10	1	4	0	1	0	5	1	8	9	X	5509865	5538251	CG3187 CG4119 CG3129 CG4111 CG3171 CG15779 CG15778 CG3160 CG12410
168	4	2	1	0	0	0	3	2	1	1	X	5538252	5540443	CG3149
169	2	1	0	1	0	0	2	0	2	2	X	5544424	5563015	CG4096 CG33080
170	1	2	1	0	0	2	0	0	3	4	X	5564972	5597018	CG32758 CG15773 CG3125 CG4078
171	3	2	1	0	2	1	0	1	4	4	X	5597760	5609419	CG15772 CG15929 CG15771 CG3086
172	2	4	0	1	0	1	2	2	6	6	X	5609803	5633572	CG15770 CG3097 CG15769 CG15768 CG3108 CG4064
173	4	4	1	1	1	0	2	3	1	1	X	5716075	5718600	CG3033
174	6	2	1	0	0	1	5	1	1	1	X	5719071	5722087	CG3025
175	3	1	0	0	2	0	1	1	2	2	X	5722232	5728636	CG3016 CG16721
176	3	1	0	0	1	0	2	1	3	4	X	5746100	5762029	CG4027 CG4020 CG12236 CG3011
177	1	1	0	0	0	0	1	1	1	1	X	5762413	5786906	CG3726
178	1	2	0	0	0	1	1	1	9	10	X	5790946	5858414	CG32756 CG6041 CG32755 CG6048 CG6067 CG4790 CG14447 CG5966 CG4766 CG4746
179	4	2	1	0	2	1	1	1	2	2	X	5883121	5893746	CG5941 CG5937
180	2	1	0	0	1	0	1	1	1	1	X	5905146	5909527	CG5921
181	1	1	0	0	0	0	1	1	5	7	X	5913196	5949209	CG5928 CG4690 CG4666 CG4660 CG4317 CG4320 CG5905
182	2	1	0	0	0	1	2	0	7	7	X	5952289	6070399	CG15899 CG32750 CG32751 CG32754 CG3599 CG3774 CG3595
183	2	1	0	1	2	0	0	0	1	1	X	6071411	6076554	CG14446
184	1	2	1	0	0	0	0	2	2	2	X	6082553	6098490	CG14445 CG3585
185	1	3	0	1	0	1	1	1	1	1	X	6101069	6102655	CG3780
186	3	6	0	1	1	2	2	3	3	5	X	6102894	6124507	CG3576 CG3781 CG12225 CG3566 CG32744
187	5	4	0	0	1	0	4	4	1	1	X	6129374	6133200	CG3458
188	7	6	0	0	1	1	6	5	1	2	X	6133390	6136479	CG15897 CG3455
189	5	1	1	0	0	0	4	1	1	3	X	6136586	6140351	CG15896 CG15891 CG15892
190	1	1	0	0	0	0	1	1	1	1	X	6140627	6144209	CG3815
191	1	5	0	2	0	2	1	1	1	1	X	6144287	6146506	CG12219
192	3	1	1	0	0	0	2	1	4	4	X	6149226	6188599	CG3823 CG15894 CG15893 CG3842
193	1	1	0	0	0	0	1	1	2	2	X	6192339	6195635	CG3847 CG3446
194	1	2	0	0	0	0	1	2	1	1	X	6195865	6206429	CG3861
195	1	1	0	0	0	0	1	1	1	1	X	6208655	6210945	CG3429
196	1	1	0	0	0	0	1	1	2	2	X	6211185	6218077	CG3869 CG12217
197	1	1	0	0	0	0	1	1	2	2	X	6312270	6330302	CG3367 CG12543
198	5	4	1	0	1	0	3	4	6	6	X	6374184	6435883	CG3926 CG3314 CG3929 CG3950 CG3960 CG17717
199	4	1	0	0	0	0	4	1	1	1	X	6436014	6441870	CG10695
200	3	2	0	0	1	0	2	2	3	3	X	6442281	6499422	CG14444 CG3973 CG3226
201	1	2	0	0	0	0	1	2	4	4	X	6499852	6519205	CG32742 CG3224 CG3977 CG3198
202	3	3	0	0	0	0	3	3	3	4	X	6519625	6528866	CG4039 CG3192 CG4094 CG4095
203	2	1	0	0	0	0	2	1	1	1	X	6529052	6532254	CG4523
204	1	1	0	0	0	0	1	1	4	4	X	6532830	6562215	CG3184 CG14442 CG14440 CG14441
205	3	1	1	0	0	0	2	1	1	1	X	6566788	6585222	CG3168
206	4	1	0	0	2	0	2	1	1	1	X	6586773	6589493	CG3203
207	5	2	0	0	1	0	4	2	2	4	X	6616472	6648782	CG14437 CG3135 CG3126 CG14436
208	2	2	0	0	0	1	2	1	3	3	X	6650364	6666151	CG4532 CG4536 CG3075
209	2	1	0	0	1	0	1	1	1	1	X	6666263	6668079	CG4542
210	2	3	0	1	0	0	2	2	1	1	X	6668491	6669293	CG4547
211	7	2	1	0	0	0	6	2	2	3	X	6669874	6688900	CG32743 CG12796 CG14435
212	5	4	0	0	0	1	5	3	2	2	X	6689579	6694723	CG4557 CG3044
213	4	1	0	0	0	0	4	1	2	2	X	6695008	6697859	CG4558 CG14434
214	1	7	0	1	0	1	1	5	1	2	X	6713744	6725755	CG33691 CG33692
215	9	6	4	1	1	0	4	5	1	2	X	6803247	6813949	CG32732 CG14431
216	1	3	0	0	0	0	1	3	2	2	X	6815177	6818646	CG4586 CG3040
217	2	1	0	1	0	0	2	0	5	5	X	6819252	6856371	CG3039 CG14430 CG2977 CG4590 CG3035
218	1	2	1	0	0	0	0	2	2	2	X	6856597	6858898	CG32736 CG3032
219	5	2	1	0	0	0	4	2	3	3	X	6876861	6895620	CG12541 CG14427 CG14426
220	4	1	1	0	0	0	3	1	2	3	X	6914649	6943289	CG4607 CG14425 CG18350
221	2	5	0	1	0	1	2	3	1	1	X	6943809	6947533	CG4615
222	2	6	0	2	0	2	2	2	1	1	X	6947786	6949734	CG4617
223	7	6	2	0	2	0	3	6	2	2	X	7038312	7131429	CG9650 CG1677
224	4	1	0	0	0	0	4	1	2	2	X	7132089	7136540	CG2059 CG1659
225	2	2	0	0	0	0	2	2	2	2	X	7153177	7168976	CG9653 CG1643
226	1	2	0	0	0	1	1	1	1	1	X	7169454	7174051	CG2079
227	3	1	0	0	2	0	1	1	3	3	X	7182606	7224035	CG1435 CG1999 CG15033
228	1	1	0	0	0	0	1	1	1	1	X	7246936	7248410	CG15035
229	1	1	0	0	0	0	1	1	1	1	X	7263830	7266876	CG9657
230	1	1	0	0	0	0	1	1	1	1	X	7419834	7421837	CG11369
231	1	2	0	0	0	0	1	2	1	1	X	7454384	7521259	CG11387
232	1	3	0	0	0	1	1	2	1	1	X	7528694	7541930	CG12690
233	2	2	0	0	1	1	1	1	1	1	X	7558021	7563164	CG15478
234	2	1	0	0	1	0	1	1	2	2	X	7567370	7573558	CG12153 CG32721
235	1	2	0	0	0	0	1	2	2	2	X	7573995	7579638	CG12155 CG12151
236	3	1	0	0	0	0	3	1	1	1	X	7580162	7581713	CG12156
237	1	1	0	0	0	0	1	1	2	2	X	7582589	7612062	CG12157 CG12663
238	1	1	0	1	0	0	1	0	1	1	X	7680215	7685172	CG1402
239	1	1	1	0	0	0	0	1	1	1	X	7697738	7699449	CG10920
240	1	2	0	1	0	0	1	1	1	1	X	7703409	7704035	CG1409
241	2	1	1	0	0	0	1	1	3	3	X	7709826	7722035	CG15326 CG2175 CG15324
242	1	3	0	0	0	2	1	1	1	1	X	7722199	7729340	CG15327
243	2	4	0	2	1	0	1	2	2	2	X	7734302	7738797	CG17256 CG18624
244	4	2	0	2	0	0	4	0	3	3	X	7739273	7748882	CG1422 CG10944 CG1430
245	3	6	3	0	0	1	0	5	4	4	X	7750868	7765367	CG10946 CG1444 CG1514 CG15329
246	7	8	3	0	1	1	3	7	1	1	X	7765697	7767209	CG1515
247	9	1	2	0	1	0	6	1	1	1	X	7769354	7776591	CG10777
248	1	1	0	0	0	1	1	0	2	2	X	7776965	7779916	CG10778 CG1524
249	1	1	0	0	1	0	0	1	3	4	X	7780140	7797481	CG1527 CG1530 CG2206 CG1531
250	2	8	0	2	0	1	2	5	2	2	X	7799180	7831337	CG15332 CG32858
251	6	2	0	0	0	0	6	2	1	1	X	7885179	7901373	CG2252
252	5	1	0	1	0	0	5	0	1	1	X	7906883	7915473	CG1560
253	1	5	1	3	0	2	0	0	1	1	X	7916521	7920711	CG2253
254	3	4	0	0	3	0	0	4	4	4	X	7921113	7937328	CG1571 CG2254 CG2256 CG2257
255	5	2	2	0	1	0	2	2	1	1	X	7941813	7947274	CG2258
256	2	3	0	0	0	0	2	3	1	1	X	7947816	7961380	CG2259
257	8	1	2	0	2	0	4	1	1	2	X	7962299	7966356	CG1575 CG2260
258	3	1	0	0	0	0	3	1	1	4	X	7966512	7982123	CG15335 CG2116 CG10958 CG2120
259	1	2	0	0	0	0	1	2	1	1	X	7983608	7987477	CG2262
260	2	1	0	0	0	0	2	1	1	1	X	7987852	7988757	CG17982
261	1	1	0	0	0	0	1	1	1	1	X	7989137	7990837	CG2263
262	1	2	0	0	0	0	1	2	2	2	X	7991173	7993730	CG2129 CG15336
263	2	3	0	0	0	0	2	3	6	7	X	7994106	8008028	CG10959 CG10763 CG18262 CG10961 CG1583 CG15337 CG10761
264	2	8	0	0	0	1	2	7	3	3	X	8013190	8084690	CG2278 CG2272 CG32717
265	2	2	0	0	0	0	2	2	4	4	X	8085920	8096885	CG2147 CG10964 CG2151 CG2286
266	2	2	0	0	0	0	2	2	5	6	X	8098467	8234740	CG1632 CG10965 CG15343 CG1636 CG2302 CG1387
267	1	1	0	0	0	0	1	1	2	2	X	8244631	8252522	CG10555 CG11190
268	1	3	0	0	0	1	1	2	1	1	X	8270500	8275436	CG18009
269	6	7	2	3	2	0	2	4	2	2	X	8278356	8282036	CG32712 CG12125
270	4	1	0	0	0	1	4	0	2	2	X	8282316	8287577	CG1440 CG12123
271	1	2	0	0	1	0	0	2	1	1	X	8293469	8299530	CG11202
272	2	3	0	0	0	1	2	2	1	1	X	8302242	8302796	CG32713
273	3	2	0	0	1	0	2	2	4	10	X	8306712	8361162	CG1474 CG12117 CG12116 CG33962 CG15350 CG15351 CG1478 CG11213 CG12743 CG33181
274	5	6	0	3	0	0	5	3	2	2	X	8405897	8416171	CG11265 CG12111
275	7	3	3	0	0	0	4	3	1	1	X	8419572	8433763	CG12065
276	7	8	1	3	0	2	6	3	3	3	X	8437289	8495886	CG12737 CG12109 CG12154
277	6	9	0	1	3	0	3	8	1	1	X	8522299	8525954	CG12772
278	8	5	0	0	0	0	8	5	1	1	X	8526818	8533927	CG11284
279	6	6	2	0	1	0	3	6	2	3	X	8533928	8557718	CG12108 CG11294 CG1787
280	7	1	0	1	1	0	6	0	1	2	X	8560187	8565479	CG1785 CG1994
281	1	1	1	1	0	0	0	0	3	3	X	8565793	8717371	CG1789 CG11354 CG12075
282	2	1	2	0	0	1	0	0	7	9	X	8718839	8894208	CG10701 CG1885 CG10648 CG1871 CG15352 CG12660 CG10966 CG10962 CG12662
283	1	2	0	0	1	0	0	2	7	7	X	8894480	8927582	CG33224 CG4040 CG15365 CG10970 CG7267 CG7246 CG7041
284	1	1	0	0	0	0	1	1	1	1	X	8928152	8931093	CG32707
285	11	2	3	0	1	0	7	2	2	2	X	8934752	8948940	CG7033 CG7766
286	2	7	0	0	0	1	2	6	1	1	X	8949539	8951823	CG8264
287	8	1	2	0	3	0	3	1	2	2	X	8952220	8961737	CG7039 CG9113
288	4	2	0	0	0	0	4	2	1	1	X	8970353	8980239	CG12664
289	1	4	0	0	0	0	1	4	2	2	X	8987773	8994280	CG7065 CG8971
290	2	8	0	0	0	1	2	7	1	1	X	8994546	8997199	CG7055
291	8	4	0	0	1	1	7	3	1	1	X	9002143	9003732	CG9022
292	3	6	0	0	1	2	2	4	2	2	X	9003872	9005206	CG15367 CG9034
293	8	8	0	1	1	0	7	7	1	1	X	9005338	9007262	CG9060
294	6	1	1	0	0	0	5	1	3	3	X	9008488	9037770	CG12218 CG12115 CG12057
295	8	1	0	0	3	1	5	0	1	1	X	9037890	9038848	CG12056
296	1	8	0	0	1	1	0	7	1	2	X	9039163	9041682	CG12106 CG12118
297	6	1	0	0	1	0	5	1	1	1	X	9042027	9047037	CG2194
298	1	9	0	2	0	2	1	5	4	4	X	9051341	9062568	CG12119 CG12665 CG15368 CG15369
299	7	3	2	2	2	1	3	0	1	1	X	9062876	9068478	CG12120
300	1	6	0	0	1	1	0	5	6	7	X	9070677	9092557	CG15370 CG15371 CG12121 CG32704 CG12124 CG12058 CG12127
301	3	1	0	0	0	0	3	1	2	2	X	9093016	9101041	CG15793 CG17754
302	1	2	0	0	0	0	1	2	2	2	X	9101412	9112840	CG15797 CG32703
303	1	2	0	1	0	1	1	0	1	1	X	9115996	9118110	CG17446
304	1	4	0	1	1	2	0	1	2	2	X	9118638	9128320	CG16892 CG12132
305	3	1	1	0	1	1	1	0	2	2	X	9129870	9164465	CG1689 CG12135
306	3	1	1	0	2	1	0	0	5	5	X	9171879	9396450	CG32705 CG17252 CG12139 CG12654 CG32700
307	3	5	1	0	2	1	0	4	3	3	X	9396826	9401697	CG32701 CG2998 CG15317
308	9	4	0	0	1	0	8	4	2	2	X	9403886	9425196	CG32702 CG32699
309	3	4	0	0	0	1	3	3	1	1	X	9431106	9433625	CG3001
310	3	4	0	0	0	1	3	3	1	2	X	9446255	9451187	CG3002 CG3004
311	2	4	0	0	1	1	1	3	1	1	X	9451581	9453849	CG12141
312	4	3	1	2	1	1	2	0	3	3	X	9454181	9495978	CG3003 CG3099 CG32697
313	2	1	1	1	1	0	0	0	1	1	X	9504317	9507977	CG3106
314	1	2	1	2	0	0	0	0	1	1	X	9514428	9528097	CG15319
315	1	1	1	0	0	0	0	1	2	2	X	9539409	9600490	CG12653 CG1343
316	2	1	0	0	0	0	2	1	2	2	X	9623967	9694451	CG1354 CG32698
317	1	1	0	0	0	0	1	1	1	1	X	9710439	9712291	CG2045
318	1	1	0	0	0	0	1	1	10	10	X	9713407	9776200	CG15245 CG32696 CG32695 CG15247 CG9686 CG9689 CG9691 CG15249 CG1986 CG1780
319	2	2	0	0	0	0	2	2	6	8	X	9808674	9855074	CG1791 CG1889 CG15250 CG15251 CG15252 CG32694 CG32692 CG33557
320	4	1	0	0	0	0	4	1	3	3	X	9875333	9895636	CG2989 CG15314 CG15313
321	1	3	0	1	0	1	1	1	2	2	X	9896169	9901037	CG2979 CG2985
322	2	9	0	1	1	0	1	8	2	3	X	9902315	9927703	CG15312 CG32693 CG32685
323	12	10	2	2	1	0	9	8	4	4	X	9931754	10057567	CG12094 CG12102 CG15311 CG15309
324	7	3	0	0	1	0	6	3	2	3	X	10109445	10171178	CG12643 CG32684 CG32682
325	9	1	1	1	1	0	7	0	4	5	X	10175377	10216904	CG15306 CG15307 CG12641 CG2221 CG32686
326	1	1	1	1	0	0	0	0	1	3	X	10216905	10228452	CG17841 CG2898 CG32681
327	1	3	1	0	0	0	0	3	1	1	X	10228837	10230355	CG2222
328	4	1	0	0	0	0	4	1	3	3	X	10231154	10304897	CG2096 CG32683 CG15302
329	1	1	0	0	0	1	1	0	2	2	X	10305965	10318803	CG15304 CG17255
330	4	2	3	0	1	1	0	1	1	1	X	10319156	10322420	CG2889
331	4	3	2	1	1	0	1	2	1	1	X	10324585	10327162	CG2890
332	2	1	1	0	0	0	1	1	1	1	X	10327246	10331845	CG32687
333	1	4	0	2	0	1	1	1	3	4	X	10335685	10441034	CG33175 CG32680 CG32678 CG1619
334	2	4	0	3	1	0	1	1	4	5	X	10441295	10554897	CG2124 CG1628 CG9817 CG15295 CG32677
335	3	2	2	1	0	0	1	1	1	1	X	10558336	10589923	CG32676
336	3	4	1	0	0	0	2	4	3	4	X	10589924	10613553	CG1799 CG11556 CG32675 CG32672
337	9	2	1	0	3	0	5	2	1	1	X	10641215	10668000	CG1691
338	1	6	0	2	0	0	1	4	4	7	X	10677967	10700092	CG1664 CG15210 CG15209 CG32669 CG17333 CG2202 CG11207
339	3	1	0	0	0	0	3	1	1	1	X	10702875	10708798	CG2186
340	1	2	0	0	0	0	1	2	1	2	X	10714524	10723025	CG2157 CG1637
341	1	6	0	1	0	0	1	5	2	2	X	10723360	10744520	CG1615 CG1582
342	3	4	0	1	0	2	3	1	4	4	X	10751302	10774930	CG15207 CG11203 CG2155 CG2145
343	3	2	0	0	2	0	1	2	12	13	X	10783667	10937312	CG2174 CG16922 CG1567 CG15204 CG12626 CG11160 CG1552 CG1545 CG1537 CG15203 CG18085 CG2081 CG2076
344	1	6	0	1	0	1	1	4	3	3	X	10937947	10953142	CG2061 CG1961 CG11126
345	4	4	0	0	1	0	3	4	3	3	X	10957613	10974321	CG11122 CG16916 CG2522
346	6	6	0	1	1	1	5	4	7	7	X	10975454	10993807	CG1453 CG18292 CG32667 CG15199 CG15202 CG15201 CG1404
347	3	1	0	0	0	0	3	1	1	2	X	10994667	10998997	CG1908 CG1397
348	2	1	0	0	0	0	2	1	8	9	X	10999619	11167564	CG1938 CG32668 CG1386 CG11105 CG12625 CG15198 CG12624 CG12623 CG1641
349	2	3	0	0	0	0	2	3	2	2	X	11169516	11179292	CG1639 CG1657
350	6	1	0	0	0	0	6	1	3	3	X	11194272	11200516	CG1738 CG11752 CG1737
351	1	1	0	0	0	0	1	1	1	1	X	11201099	11203944	CG18361
352	1	1	0	0	0	0	1	1	1	2	X	11204455	11213315	CG11750 CG1594
353	1	1	0	0	0	0	1	1	1	1	X	11213679	11214401	CG1728
354	2	1	0	0	0	0	2	1	1	1	X	11214855	11254214	CG1725
355	1	1	0	1	0	0	1	0	2	2	X	11258718	11262621	CG32664 CG17867
356	1	5	1	2	0	0	0	3	2	3	X	11268073	11299520	CG1743 CG11727 CG1747
357	1	9	0	0	0	1	1	8	4	4	X	11300009	11328323	CG1745 CG15194 CG1756 CG11715
358	6	12	0	0	2	3	4	9	1	1	X	11338388	11400264	CG32666
359	3	2	0	0	1	0	2	2	1	1	X	11407991	11415540	CG1554
360	4	1	0	0	0	1	4	0	2	2	X	11415842	11418742	CG11699 CG11697
361	2	4	0	2	2	0	0	2	1	2	X	11419019	11421813	CG11696 CG15191
362	5	1	0	0	1	0	4	1	1	1	X	11437621	11443753	CG1697
363	1	4	0	0	0	0	1	4	1	1	X	11444041	11449398	CG2247
364	3	5	0	2	0	0	3	3	2	2	X	11449769	11453592	CG1703 CG15220
365	1	6	0	0	0	4	1	2	1	1	X	11454620	11456839	CG1705
366	3	2	0	0	0	0	3	2	1	1	X	11459780	11514024	CG1817
367	2	3	0	1	0	0	2	2	1	1	X	11515114	11516322	CG2371
368	3	1	1	0	0	0	2	1	1	1	X	11516766	11532504	CG1822
369	1	5	0	0	0	2	1	3	3	4	X	11532902	11552801	CG1830 CG2444 CG2448 CG2446
370	5	2	0	0	1	0	4	2	1	1	X	11554739	11557669	CG1837
371	2	3	0	0	0	0	2	3	6	7	X	11558006	11626190	CG1841 CG2457 CG15221 CG9369 CG9360 CG9355 CG4139
372	5	4	0	0	2	3	3	1	3	3	X	11626472	11650468	CG15224 CG4147 CG1578
373	3	2	1	0	1	1	1	1	1	2	X	11657288	11669662	CG32663 CG32662
374	3	1	0	0	1	0	2	1	2	2	X	11673547	11680102	CG1895 CG15740
375	2	3	0	0	0	0	2	3	1	1	X	11685268	11686452	CG1967
376	1	4	0	0	0	0	1	4	1	1	X	11686629	11688710	CG10347
377	7	1	0	0	0	0	7	1	1	1	X	11688933	11697629	CG1886
378	1	5	0	0	0	0	1	5	1	1	X	11698586	11702821	CG2025
379	6	6	0	1	0	0	6	5	5	5	X	11849442	11862965	CG1803 CG15736 CG15735 CG1796 CG1490
380	4	2	0	0	0	1	4	1	7	7	X	11866569	12166113	CG1786 CG32656 CG11356 CG2750 CG15733 CG12720 CG32659
381	2	1	0	0	1	1	1	0	1	1	X	12242826	12243768	CG2574
382	1	1	0	1	1	0	0	0	1	2	X	12266163	12287587	CG10524 CG11245
383	1	1	1	1	0	0	0	0	1	1	X	12288806	12289375	CG15927
384	1	2	1	0	0	2	0	0	2	2	X	12290341	12297045	CG15731 CG1900
385	1	2	0	0	1	0	0	2	2	2	X	12298036	12311447	CG17788 CG15926
386	1	1	0	0	0	0	1	1	3	3	X	12320910	12350484	CG2560 CG15730 CG2556
387	1	1	0	0	0	0	1	1	1	1	X	12352916	12358229	CG11146
388	1	2	0	0	0	0	1	2	3	3	X	12363111	12399388	CG32653 CG2555 CG15729
389	2	4	0	0	0	0	2	4	2	2	X	12405147	12426130	CG11138 CG1848
390	4	1	0	0	0	0	4	1	1	1	X	12426486	12429576	CG1824
391	1	1	0	0	0	0	1	1	1	2	X	12431290	12445536	CG32654 CG1463
392	1	3	0	1	0	1	1	1	5	5	X	12445851	12465056	CG2543 CG11085 CG15728 CG15727 CG2540
393	5	3	0	1	3	2	2	0	1	1	X	12493299	12513623	CG4070
394	2	3	1	0	1	0	0	3	2	3	X	12519935	12583722	CG4013 CG15725 CG4004
395	3	5	0	1	0	0	3	4	2	2	X	12591679	12604920	CG3989 CG3812
396	3	1	0	1	0	0	3	0	3	4	X	12610509	12665573	CG32647 CG32648 CG3775 CG3754
397	1	1	1	0	0	0	0	1	3	3	X	12731484	12737420	CG32650 CG32649 CG4407
398	2	1	0	1	0	0	2	0	3	3	X	12737680	12743535	CG4404 CG4647 CG4400
399	2	1	2	0	0	0	0	1	6	6	X	12743890	12808425	CG4645 CG4396 CG4395 CG32642 CG32644 CG15721
400	2	2	0	0	0	0	2	2	5	5	X	12808722	12910072	CG12716 CG15719 CG15720 CG12715 CG18646
401	4	1	0	0	0	0	4	1	3	3	X	12913652	12929674	CG4353 CG12244 CG2200
402	1	6	0	1	0	0	1	5	3	3	X	12930029	12948373	CG4351 CG4349 CG12714
403	2	1	0	0	0	0	2	1	1	2	X	12949074	12962731	CG4346 CG32638
404	1	1	0	1	0	0	1	0	1	1	X	12962957	12964228	CG15717
405	1	1	1	0	0	0	0	1	1	1	X	12965475	12968502	CG4330
406	2	1	0	0	0	0	2	1	2	2	X	12988977	12993515	CG4332 CG4303
407	1	9	0	0	0	1	1	8	5	5	X	12993643	13028310	CG12096 CG4187 CG32637 CG12723 CG2453
408	3	3	0	2	0	1	3	0	1	1	X	13046270	13047918	CG1591
409	4	7	3	0	1	2	0	5	2	2	X	13048346	13096431	CG1771 CG1618
410	1	2	0	0	0	1	1	1	1	1	X	13096817	13119258	CG1770
411	2	3	0	0	1	0	1	3	1	1	X	13119967	13121678	CG15743
412	1	9	0	0	0	1	1	8	2	2	X	13122300	13130588	CG15744 CG1764
413	3	1	0	0	0	0	3	1	1	1	X	13131036	13133847	CG1622
414	1	5	0	0	0	1	1	4	3	3	X	13139235	13163254	CG15745 CG12724 CG1630
415	7	1	0	0	3	1	4	0	5	5	X	13163785	13204270	CG1633 CG2033 CG15747 CG10617 CG15749
416	1	2	0	0	1	0	0	2	1	1	X	13204543	13214097	CG1640
417	2	4	0	1	0	1	2	2	5	5	X	13214626	13235166	CG1987 CG1660 CG1989 CG1662 CG1673
418	9	4	1	2	1	1	7	1	1	1	X	13243307	13247011	CG1998
419	6	3	2	0	1	0	3	3	2	2	X	13411367	13436440	CG32632 CG7107
420	2	1	0	0	0	0	2	1	2	2	X	13440108	13445913	CG11178 CG9938
421	4	3	1	0	0	0	3	3	1	1	X	13556226	13561049	CG11156
422	6	2	0	0	2	1	4	1	2	4	X	13561140	13578592	CG10986 CG10988 CG11134 CG11151
423	4	1	1	0	1	0	2	1	2	2	X	13580605	13590740	CG10990 CG32625
424	1	4	0	0	0	2	1	2	2	2	X	13591114	13595113	CG11130 CG11129
425	4	1	0	0	2	0	2	1	1	1	X	13596707	13610686	CG11111
426	1	5	0	0	0	0	1	5	1	1	X	13613955	13616118	CG10992
427	8	4	0	0	1	0	7	4	1	1	X	13616450	13617323	CG11103
428	6	5	0	3	1	0	5	2	1	2	X	13617686	13645438	CG33174 CG10996
429	4	3	2	2	0	1	2	0	1	1	X	13645636	13646815	CG11095
430	1	3	0	0	1	0	0	3	3	3	X	13647379	13664196	CG10997 CG11092 CG11063
431	2	1	0	0	0	0	2	1	7	7	X	13664686	13966705	CG32626 CG11071 CG32611 CG11072 CG11068 CG18319 CG32614
432	1	1	0	0	0	0	1	1	1	1	X	13985627	13985851	CG12479
433	1	1	0	0	0	1	1	0	5	5	X	14003550	14019673	CG12480 CG1368 CG11581 CG11584 CG32603
434	1	5	0	0	1	1	0	4	1	1	X	14021190	14021781	CG12481
435	2	4	0	0	1	0	1	4	3	3	X	14023736	14033896	CG11585 CG13403 CG1372
436	7	2	0	0	1	0	6	2	1	1	X	14034141	14034844	CG11590
437	2	3	0	1	0	1	2	1	1	3	X	14035309	14059821	CG32604 CG32597 CG11674
438	2	4	0	1	1	1	1	2	3	3	X	14060228	14067989	CG15871 CG33249 CG33248
439	3	1	1	0	1	0	1	1	1	1	X	14068343	14071860	CG1839
440	1	5	0	1	0	0	1	4	2	2	X	14071926	14076756	CG1434 CG1810
441	4	8	1	1	0	1	3	6	5	5	X	14081780	14121977	CG12047 CG1461 CG13404 CG1517 CG32602
442	1	7	0	0	0	1	1	6	2	2	X	14666575	14672134	CG14411 CG14407
443	4	1	0	0	1	0	3	1	2	13	X	14673353	14784675	CG32593 CG12539 CG9522 CG9521 CG9519 CG9518 CG9517 CG9514 CG9512 CG9509 CG12398 CG9503 CG9009
444	1	2	0	0	0	0	1	2	1	1	X	14805193	14839263	CG10952
445	1	3	0	0	0	1	1	2	3	5	X	14844620	14900323	CG32592 CG32594 CG5541 CG5548 CG9053
446	1	1	0	0	0	0	1	1	4	4	X	14905393	14918592	CG9057 CG33177 CG33178 CG9065
447	1	1	0	0	0	0	1	1	1	1	X	14919098	14919744	CG15027
448	1	3	0	1	0	0	1	2	7	9	X	14920075	15021644	CG5599 CG5627 CG9072 CG9081 CG33968 CG9091 CG9095 CG15028 CG15029
449	4	3	1	1	1	0	2	2	2	2	X	15044335	15063628	CG5662 CG9101
450	7	6	4	2	1	0	2	4	3	3	X	15126970	15151702	CG5877 CG15032 CG6211
451	3	2	0	0	0	1	3	1	1	2	X	15162283	15167377	CG6157 CG9114
452	5	1	2	0	2	0	1	1	2	3	X	15168415	15178551	CG6170 CG9123 CG12608
453	1	1	0	0	0	0	1	1	1	1	X	15179056	15183958	CG6227
454	1	1	0	0	0	1	1	0	5	6	X	15186294	15283826	CG9151 CG9156 CG9164 CG9176 CG18210 CG9195
455	2	4	1	2	1	0	0	2	2	3	X	15284199	15296272	CG11654 CG11655 CG9198
456	4	2	0	0	0	0	4	2	3	4	X	15296649	15306021	CG6299 CG6294 CG15642 CG9201
457	1	6	0	1	0	2	1	3	2	2	X	15306180	15309314	CG6308 CG9203
458	4	1	0	0	2	1	2	0	1	1	X	15316314	15320546	CG6340
459	4	1	3	0	1	1	0	0	1	1	X	15320859	15344726	CG33206
460	2	5	0	1	2	0	0	4	1	1	X	15344813	15356100	CG9210
461	5	4	1	1	0	0	4	3	1	1	X	15406007	15408522	CG9213
462	7	2	1	0	0	0	6	2	3	3	X	15410922	15416809	CG15645 CG7872 CG9215
463	2	2	0	0	0	2	2	0	2	3	X	15417098	15424865	CG8097 CG9220 CG8105
464	4	5	2	1	2	0	0	4	1	1	X	15438507	15460477	CG9224
465	3	2	0	0	0	0	3	2	5	5	X	15501999	15537702	CG15646 CG12708 CG8128 CG9240 CG9245
466	1	2	0	0	0	2	1	0	2	2	X	15538062	15544535	CG8134 CG9281
467	4	2	2	0	2	0	0	2	1	1	X	15545061	15545946	CG15601
468	1	4	0	1	0	0	1	3	3	5	X	15548052	15571013	CG8184 CG8191 CG12379 CG8198 CG11678
469	5	2	0	0	1	1	4	1	1	1	X	15571426	15572846	CG11679
470	10	10	4	1	0	1	6	8	2	2	X	15573183	15580144	CG8206 CG8944
471	3	4	0	1	0	0	3	3	1	1	X	16256781	16271435	CG32575
472	3	1	1	0	0	0	2	1	1	1	X	16273084	16275217	CG9947
473	1	4	0	0	0	0	1	4	1	1	X	16275370	16279304	CG4420
474	9	8	0	0	3	0	6	8	1	1	X	16297542	16361352	CG9907
475	6	2	0	0	0	0	6	2	1	1	X	16421848	16422873	CG13014
476	3	9	0	0	0	1	3	8	1	1	X	16422939	16427366	CG9802
477	11	7	0	0	0	0	11	7	1	1	X	16430459	16432407	CG9784
478	6	3	0	0	1	0	5	3	1	1	X	16444649	16448795	CG18582
479	2	1	0	1	0	0	2	0	1	1	X	16449447	16455523	CG9782
480	2	4	2	0	0	3	0	1	1	1	X	16459046	16471356	CG9774
481	5	3	1	0	0	1	4	2	2	2	X	16472164	16474350	CG4464 CG9742
482	5	6	0	0	1	0	4	6	1	1	X	16474842	16483634	CG4521
483	7	8	1	2	0	0	6	6	1	1	X	16487156	16488949	CG9723
484	2	2	0	0	0	0	2	2	1	2	X	16489316	16503014	CG18572 CG15865
485	2	8	0	1	0	0	2	7	2	2	X	16513252	16517832	CG13011 CG9703
486	10	2	1	0	1	0	8	2	3	8	X	16545240	16585847	CG13008 CG18358 CG32572 CG9634 CG32571 CG32570 CG32569 CG32574
487	3	8	0	0	0	2	3	6	1	1	X	16586126	16617371	CG9623
488	6	5	1	2	2	0	3	3	2	2	X	16617891	16620915	CG4742 CG9609
489	6	1	0	0	1	0	5	1	2	2	X	16621693	16629960	CG4756 CG4768
490	1	6	0	1	0	0	1	5	1	1	X	16631453	16634621	CG9132
491	2	1	0	0	0	0	2	1	1	1	X	16637617	16639217	CG13005
492	1	8	0	2	0	0	1	6	2	2	X	16640244	16660433	CG4805 CG4829
493	4	1	0	0	0	0	4	1	2	2	X	16806633	16908935	CG9059 CG8949
494	1	1	0	1	0	0	1	0	2	4	X	16911260	16921549	CG34014 CG4949 CG8945 CG4955
495	1	11	1	0	0	4	0	7	3	3	X	16925791	16939789	CG16700 CG4991 CG8936
496	6	3	0	0	1	0	5	3	1	1	X	16941574	16969058	CG5004
497	3	3	0	0	0	0	3	3	2	3	X	16970887	16982191	CG33935 CG8923 CG8922
498	4	3	1	0	1	0	2	3	2	2	X	16982975	16993243	CG5010 CG32562
499	2	3	0	0	0	1	2	2	16	16	X	16994876	17114901	CG5055 CG8918 CG5070 CG32564 CG12995 CG18258 CG5162 CG12998 CG5172 CG12997 CG10598 CG10597 CG8915 CG8675 CG12996 CG5424
500	6	5	1	0	0	2	5	3	1	1	X	17119640	17125605	CG8649
501	6	1	1	0	2	0	3	1	1	1	X	17136413	17139415	CG5445
502	1	1	0	0	0	0	1	1	5	5	X	17148518	17262671	CG5488 CG5529 CG8611 CG12994 CG5613
503	1	1	0	0	0	0	1	1	1	1	X	17280285	17282711	CG12993
504	1	4	0	0	0	1	1	3	1	1	X	17282922	17286480	CG8568
505	5	3	1	0	1	0	3	3	3	3	X	17290481	17403072	CG8557 CG12432 CG8527
506	3	7	0	1	0	0	3	6	1	1	X	17405791	17412835	CG8465
507	7	9	1	3	0	3	6	3	2	2	X	17457151	17465957	CG8408 CG8316
508	4	5	0	0	2	0	2	5	2	2	X	17466026	17469979	CG5703 CG8289
509	3	2	0	0	0	1	3	1	2	2	X	17470220	17486443	CG5800 CG32555
510	3	1	1	0	1	1	1	0	1	2	X	17486705	17503159	CG8211 CG5870
511	1	9	0	2	1	1	0	6	5	5	X	17503160	17543595	CG12990 CG32556 CG8188 CG5884 CG8173
512	8	2	0	1	1	0	7	1	1	3	X	17544723	17585632	CG32560 CG32559 CG15816
513	1	2	0	1	0	0	1	1	3	3	X	17603320	17653552	CG6269 CG6352 CG12986
514	1	7	0	0	0	1	1	6	1	1	X	17656264	17659930	CG8146
515	11	3	0	0	0	1	11	2	1	1	X	17678925	17681593	CG6492
516	7	2	3	0	2	0	2	2	5	6	X	17682046	17694744	CG15814 CG6506 CG32554 CG32557 CG6762 CG7846
517	2	6	0	2	0	1	2	3	1	3	X	17694865	17721144	CG6769 CG7826 CG12985
518	6	4	1	0	3	1	2	3	2	2	X	17733676	17741221	CG32495 CG7772
519	11	1	2	0	3	0	6	1	5	6	X	17741624	17882567	CG6842 CG6847 CG12348 CG12672 CG6867 CG15373
520	2	3	0	1	0	0	2	2	3	4	X	17898539	17924415	CG7092 CG7536 CG7098 CG7206
521	2	6	1	0	0	3	1	3	1	1	X	17925183	17926792	CG7113
522	5	2	0	0	3	0	2	2	1	1	X	17928528	17931354	CG7122
523	1	1	0	0	0	0	1	1	1	1	X	17931771	17935271	CG7192
524	3	7	0	0	0	0	3	7	1	1	X	17935909	17937421	CG7128
525	2	2	0	0	0	0	2	2	1	1	X	17939490	17950759	CG7178
526	5	7	1	4	0	0	4	3	1	1	X	17966073	17971035	CG5659
527	6	1	0	0	2	0	4	1	13	13	X	17989305	18209988	CG5744 CG12611 CG5907 CG5927 CG15064 CG33639 CG5988 CG33542 CG5993 CG6023 CG6123 CG6106 CG6103
528	1	3	0	0	0	2	1	1	1	1	X	18211456	18213788	CG6205
529	3	1	0	0	2	0	1	1	1	1	X	18215484	18219132	CG6223
530	2	1	0	0	0	0	2	1	3	3	X	18221869	18258487	CG6186 CG32549 CG15055
531	1	1	0	0	0	0	1	1	2	4	X	18259870	18274518	CG32550 CG32548 CG6290 CG32551
532	1	2	0	0	0	0	1	2	3	3	X	18278175	18320858	CG32547 CG6361 CG6367
533	1	1	0	0	0	0	1	1	4	4	X	18321585	18333806	CG15046 CG15044 CG15043 CG6394
534	3	4	0	0	0	1	3	3	6	6	X	18339818	18446510	CG6461 CG6470 CG6335 CG15048 CG6500 CG15040
535	6	4	3	2	1	1	2	1	3	4	X	18469571	18487028	CG6606 CG6540 CG6617 CG6632
536	3	1	0	0	2	0	1	1	1	1	X	18487329	18491223	CG6659
537	1	1	0	0	0	0	1	1	3	4	X	18491691	18526682	CG6551 CG6696 CG6578 CG6816
538	1	1	0	0	0	1	1	0	1	1	X	18542601	18560509	CG6857
539	1	1	0	0	1	1	0	0	1	1	X	18573215	18573661	CG6873
540	1	11	0	3	1	0	0	8	2	3	X	18598653	18617425	CG32540 CG6891 CG18259
541	6	8	0	1	0	2	6	5	2	2	X	18664543	18676838	CG7101 CG7103
542	4	2	0	1	1	0	3	1	4	4	X	18678436	18691388	CG7274 CG7280 CG7282 CG7322
543	3	1	1	0	0	0	2	1	3	3	X	18692153	18697653	CG7288 CG32544 CG7326
544	1	4	0	0	0	0	1	4	2	2	X	18699377	18714576	CG17757 CG32542
545	4	5	0	0	0	0	4	5	1	1	X	18718439	18721559	CG7332
546	4	4	0	0	1	0	3	4	1	1	X	18728444	18730520	CG7349
547	2	1	0	0	0	0	2	1	4	5	X	18734347	19004579	CG7378 CG32541 CG7481 CG7502 CG7537
548	2	5	0	0	0	1	2	4	1	1	X	19010934	19013892	CG7556
549	7	1	1	1	2	0	4	0	2	2	X	19026438	19029984	CG7914 CG14194
550	1	2	1	0	0	1	0	1	1	1	X	19029995	19035714	CG7990
551	4	1	1	0	2	0	1	1	2	2	X	19036576	19045295	CG12359 CG14195
552	1	3	0	1	0	0	1	2	4	4	X	19047194	19072404	CG7874 CG7876 CG7884 CG14196
553	11	1	2	0	3	1	6	0	2	3	X	19077570	19085983	CG7889 CG7992 CG7890
554	3	5	1	1	2	2	0	2	1	1	X	19086048	19095163	CG8002
555	3	3	0	0	1	1	2	2	1	2	X	19095768	19107216	CG7893 CG8010
556	6	4	2	2	0	0	4	2	2	2	X	19107722	19110809	CG32537 CG32536
557	2	2	1	0	0	0	1	2	1	1	X	19111193	19114285	CG8028
558	2	1	0	0	0	0	2	1	1	1	X	19116457	19118765	CG8034
559	2	1	0	0	0	0	2	1	1	1	X	19135258	19141861	CG8051
560	4	3	2	0	0	0	2	3	1	1	X	19144965	19156002	CG8062
561	10	1	0	0	2	0	8	1	1	1	X	19187135	19304001	CG12199
562	1	1	0	0	0	0	1	1	3	3	X	19308082	19318580	CG32533 CG32531 CG12202
563	1	1	0	0	0	0	1	1	1	1	X	19319684	19325888	CG3291
564	1	1	0	0	0	0	1	1	1	2	X	19326360	19328338	CG12203 CG12204
565	1	1	0	0	0	0	1	1	4	4	X	19328483	19355747	CG14199 CG3400 CG14200 CG12233
566	1	2	0	0	0	0	1	2	2	3	X	19355964	19381419	CG33525 CG32534 CG32532
567	3	3	0	1	0	1	3	1	1	1	X	19395277	19399533	CG3917
568	2	6	0	0	1	1	1	5	2	2	X	19400137	19413746	CG12230 CG14217
569	8	1	3	0	1	0	4	1	2	2	X	19431968	19435787	CG14206 CG14220
570	1	2	0	0	0	0	1	2	2	2	X	19439095	19449551	CG14207 CG14208
571	1	6	0	2	0	1	1	3	1	3	X	19450144	19452466	CG14210 CG12788 CG17767
572	3	2	0	0	1	0	2	2	1	1	X	19455383	19457009	CG14222
573	2	2	0	1	0	1	2	0	1	1	X	19457051	19459666	CG14211
574	1	7	0	0	1	0	0	7	2	2	X	19459671	19472289	CG14212 CG12238
575	5	3	2	2	0	0	3	1	4	4	X	19480521	19500812	CG12234 CG14215 CG14223 CG14216
576	2	1	1	0	0	0	1	1	1	1	X	19501170	19506289	CG12529
577	1	2	0	0	0	0	1	2	2	2	X	19506573	19517453	CG14225 CG14226
578	3	2	0	0	0	0	3	2	2	2	X	19517685	19527435	CG14224 CG14228
579	2	2	0	0	0	0	2	2	2	2	X	19528130	19533189	CG14229 CG12530
580	1	6	0	3	0	1	1	2	5	5	X	19534007	19560623	CG14231 CG14232 CG14230 CG14233 CG12531
581	3	2	0	0	1	0	2	2	3	4	X	19564940	19578275	CG12532 CG14234 CG14235 CG18809
582	2	1	0	0	0	0	2	1	1	2	X	19578370	19579684	CG33931 CG33932
583	1	5	0	0	0	1	1	4	2	2	X	19579994	19584108	CG32528 CG12534
584	6	1	0	0	1	0	5	1	1	2	X	19584737	19596260	CG12703 CG12702
585	1	3	0	1	0	2	1	0	2	2	X	19609924	19685988	CG12701 CG11940
586	2	1	1	0	1	1	0	0	1	1	X	19686153	19693318	CG11943
587	1	1	0	1	1	0	0	0	1	1	X	19702347	19740624	CG32529
588	1	5	1	0	0	2	0	3	9	9	X	19792437	19996667	CG12655 CG9565 CG17003 CG33517 CG15322 CG18859 CG9572 CG9575 CG9576
589	4	3	0	0	1	0	3	3	2	3	X	20000357	20005211	CG9577 CG9581 CG9578
590	3	1	0	0	0	0	3	1	3	4	X	20038836	20062132	CG18000 CG17052 CG17058 CG17068
591	1	1	0	0	0	0	1	1	1	2	X	20062133	20067806	CG17060 CG17065
592	2	2	0	0	0	0	2	2	2	2	X	20078656	20122349	CG17063 CG1504
593	5	4	0	0	0	1	5	3	1	2	X	20202127	20204456	CG11738 CG1467
594	3	5	0	0	1	1	2	4	7	8	X	20205154	20234675	CG11734 CG15459 CG15458 CG11748 CG1670 CG15457 CG1668 CG32505
595	3	2	0	0	0	0	3	2	1	1	X	20234676	20237088	CG1676
596	1	4	0	0	0	0	1	4	1	1	X	20237322	20237666	CG15456
597	3	2	0	0	0	0	3	2	1	1	X	20238202	20240275	CG11710
598	3	2	0	0	0	0	3	2	1	1	X	20240357	20243886	CG1692
599	2	1	0	0	0	1	2	0	4	4	X	20250017	20301782	CG1695 CG32506 CG1702 CG1412
600	4	1	3	0	1	1	0	0	2	2	X	20322223	20335602	CG1812 CG18492
601	2	1	1	0	1	0	0	1	10	10	X	20351557	20637022	CG15455 CG15454 CG15453 CG1379 CG1829 CG1849 CG15452 CG32508 CG15450 CG12678
602	1	1	0	0	0	0	1	1	1	1	X	20691666	20693302	CG11233
603	1	2	0	0	0	0	1	2	3	3	X	20722357	20750057	CG11229 CG11227 CG12092
604	2	4	0	0	0	1	2	3	2	2	X	20834066	20839022	CG10998 CG1532
605	7	1	1	0	1	0	5	1	1	1	X	20860640	20864792	CG1518
606	1	1	0	0	0	0	1	1	1	2	X	20865227	20889621	CG32513 CG32512
607	3	1	0	0	0	0	3	1	1	3	X	20904520	20927183	CG11566 CG33670 CG1501
608	2	1	0	0	0	0	2	1	3	3	X	20927835	20950803	CG15445 CG32516 CG1819
609	3	1	0	0	0	0	3	1	4	4	X	21015986	21125731	CG32521 CG1494 CG1718 CG1801
610	1	1	0	0	0	0	1	1	3	4	X	21126736	21134709	CG1489 CG33713 CG33714 CG1696
611	2	1	0	0	0	0	2	1	3	3	X	21134721	21155766	CG1486 CG1693 CG1484
612	6	5	1	0	0	0	5	5	1	2	X	21156056	21160515	CG17051 CG1685
613	6	2	0	0	0	0	6	2	1	1	X	21161006	21168586	CG1391
614	5	4	0	3	0	0	5	1	3	4	X	21168952	21195837	CG1403 CG1410 CG1414 CG1417
615	4	2	2	1	0	1	2	0	5	5	X	21199683	21268410	CG1424 CG12794 CG14583 CG12564 CG12565
616	2	12	0	2	2	2	0	8	2	2	X	21411276	21419534	CG14476 CG17450
617	10	2	2	0	1	0	7	2	1	1	X	21653344	21654866	CG14620
618	1	5	0	0	0	1	1	4	3	3	X	21655139	21675374	CG14614 CG14619 CG14613
619	3	2	1	0	1	0	1	2	1	1	X	21678244	21685486	CG12576
620	2	2	0	0	0	2	2	0	1	1	X	21685800	21689519	CG14617
621	4	9	2	1	2	0	0	8	3	5	X	21690582	21747622	CG14616 CG17600 CG17596 CG17598 CG17599
A-cent	10	-	1	-	2	-	7	-
B-telo	-	6	-	0	-	0	-	6
622	4	6	0	0	0	2	4	4	1	1	2L	9836	18583	CG2671
623	6	2	1	1	1	1	4	0	1	1	2L	102382	104054	CG11377
624	2	1	0	0	2	0	0	1	1	2	2L	104055	114433	CG12178 CG2674
625	1	2	0	0	0	0	1	2	9	9	2L	117079	153106	CG4822 CG3164 CG2718 CG31976 CG31975 CG31974 CG11454 CG4648 CG11620
626	1	1	0	0	0	0	1	1	4	4	2L	153535	158603	CG3709 CG11455 CG3436 CG33635
627	1	2	0	0	0	0	1	2	2	3	2L	159040	207297	CG18497 CG11488 CG11617
628	1	3	0	0	0	0	1	3	3	4	2L	207399	252331	CG11490 CG3696 CG13693 CG11606
629	5	1	0	0	0	0	5	1	5	5	2L	277588	294679	CG11561 CG3625 CG11592 CG11562 CG3582
630	2	4	0	0	0	0	2	4	2	2	2L	295109	303955	CG2720 CG2699
631	2	1	0	0	0	1	2	0	2	8	2L	312343	357868	CG4574 CG11912 CG11911 CG33127 CG31920 CG33992 CG31921 CG11907
632	1	1	0	0	1	0	0	1	2	2	2L	378116	402181	CG3935 CG4213
633	1	3	0	0	0	0	1	3	1	1	2L	404286	408035	CG4033
634	2	1	0	0	0	0	2	1	1	2	2L	408036	418536	CG4260 CG4063
635	3	2	0	0	0	0	3	2	3	3	2L	418557	421407	CG13690 CG4087 CG11885
636	3	1	0	0	0	0	3	1	1	1	2L	421800	422435	CG13692
637	1	1	0	0	0	0	1	1	1	1	2L	423452	425291	CG13691
638	1	1	0	0	0	0	1	1	1	2	2L	431253	453023	CG4114 CG4280
639	1	1	0	0	0	0	1	1	6	6	2L	453111	540541	CG4164 CG4133 CG4297 CG4184 CG4427 CG2762
640	2	1	0	0	0	0	2	1	2	2	2L	541235	544627	CG3018 CG11840
641	1	1	0	0	0	0	1	1	3	3	2L	545148	558762	CG11822 CG2914 CG11838
642	1	1	0	0	0	0	1	1	3	4	2L	559611	568162	CG2789 CG11835 CG2794 CG2863
643	1	1	0	0	0	0	1	1	6	6	2L	568346	594687	CG2807 CG13688 CG2813 CG13687 CG2819 CG2851
644	1	4	0	0	0	0	1	4	5	6	2L	640021	790795	CG17941 CG3159 CG3022 CG13948 CG3544 CG3324
645	5	1	0	0	0	0	5	1	6	9	2L	811632	833245	CG3561 CG3883 CG3639 CG15880 CG3876 CG3642 CG3662 CG3862 CG3727
646	1	1	0	0	0	0	1	1	6	6	2L	833584	865861	CG3365 CG4291 CG3943 CG13949 CG13950 CG4276
647	1	2	0	0	0	0	1	2	1	1	2L	868675	869911	CG4258
648	1	4	0	0	0	1	1	3	4	5	2L	870464	958100	CG33526 CG3966 CG15824 CG4226 CG4341
649	1	1	0	0	0	0	1	1	2	3	2L	1011403	1077811	CG31795 CG4415 CG4385
650	1	1	0	0	0	0	1	1	1	1	2L	1077980	1080809	CG4426
651	1	2	0	1	0	0	1	1	3	4	2L	1080913	1112702	CG4428 CG4629 CG4644 CG14339
652	2	3	1	1	0	1	1	1	7	9	2L	1112988	1156306	CG14340 CG4710 CG4552 CG4577 CG4726 CG4749 CG5041 CG4764 CG33979
653	3	1	0	0	1	0	2	1	4	5	2L	1158679	1170079	CG4775 CG5080 CG4785 CG14341 CG5105
654	1	1	0	0	0	0	1	1	6	7	2L	1170234	1199189	CG31922 CG5118 CG4887 CG4896 CG4947 CG5001 CG5139
655	1	1	0	0	0	0	1	1	1	1	2L	1204316	1205081	CG14342
656	1	3	0	0	0	0	1	3	13	13	2L	1240038	1502903	CG5397 CG5423 CG5430 CG5450 CG5561 CG5565 CG31659 CG33126 CG5481 CG31928 CG33128 CG18131 CG7420
657	3	1	0	0	0	0	3	1	3	4	2L	1517532	1614182	CG7428 CG14351 CG31935 CG7361
658	2	2	0	0	0	0	2	2	1	1	2L	1667847	1698632	CG31666
659	3	1	0	0	0	1	3	0	2	2	2L	1704904	1710415	CG17158 CG17660
660	1	7	0	0	1	2	0	5	2	3	2L	1710466	1724391	CG17642 CG17657 CG18317
661	3	2	0	1	0	0	3	1	5	6	2L	1724971	1752116	CG17654 CG31938 CG31937 CG17652 CG17646 CG17712
662	2	1	1	1	0	0	1	0	1	1	2L	1752349	1752851	CG17648
663	1	3	1	0	0	0	0	3	4	5	2L	1831792	1943816	CG15623 CG31665 CG31663 CG7295 CG7337
664	3	1	0	0	0	0	3	1	3	3	2L	1950235	1980612	CG31670 CG10908 CG15356
665	1	1	0	0	0	0	1	1	1	1	2L	1981310	1981927	CG15362
666	1	1	0	1	0	0	1	0	1	2	2L	1982234	1986955	CG7289 CG4233
667	2	1	2	0	0	0	0	1	1	1	2L	1988291	1988949	CG7291
668	1	1	0	0	0	0	1	1	3	3	2L	1997774	2008855	CG33543 CG15353 CG15361
669	1	5	0	0	0	0	1	5	4	4	2L	2024043	2057967	CG4238 CG15378 CG4244 CG15377
670	6	3	0	0	2	1	4	2	1	1	2L	2130815	2137296	CG7254
671	2	1	0	0	1	1	1	0	1	1	2L	2137350	2145175	CG31671
672	1	2	0	0	1	0	0	2	2	3	2L	2145491	2155390	CG11723 CG7261 CG7263
673	1	3	0	0	0	1	1	2	4	5	2L	2155760	2214179	CG15382 CG3166 CG10874 CG15385 CG4265
674	2	6	0	0	1	4	1	2	2	2	2L	2214972	2217168	CG10880 CG15386
675	4	2	0	1	3	0	1	1	6	7	2L	2217363	2239365	CG7074 CG7082 CG15387 CG7085 CG10882 CG31679 CG32463
676	2	1	1	0	0	0	1	1	3	3	2L	2239408	2251270	CG31682 CG4267 CG17240
677	1	1	0	1	0	0	1	0	2	2	2L	2251584	2264239	CG17239 CG4270
678	1	1	1	1	0	0	0	0	1	1	2L	2288495	2289370	CG17237
679	1	2	1	0	0	2	0	0	7	8	2L	2290329	2374511	CG10838 CG16995 CG9967 CG33955 CG3664 CG4272 CG3597 CG3609
680	1	2	0	0	1	2	0	0	1	1	2L	2374689	2375696	CG15390
681	1	1	0	0	1	0	0	1	1	1	2L	2375894	2380514	CG9866
682	1	1	0	0	0	0	1	1	6	6	2L	2381140	2419771	CG9867 CG9870 CG3557 CG9887 CG18641 CG31684
683	1	1	0	0	0	0	1	1	9	9	2L	2420808	2573047	CG9886 CG9885 CG15393 CG3539 CG9884 CG3528 CG3515 CG9964 CG18559
684	3	1	0	0	0	0	3	1	2	2	2L	2575276	2579180	CG3227 CG9883
685	2	1	0	0	0	0	2	1	3	3	2L	2579244	2585448	CG3214 CG9881 CG3210
686	1	1	0	0	0	0	1	1	1	1	2L	2610146	2611285	CG15395
687	1	1	0	0	0	0	1	1	2	2	2L	2646686	2652291	CG9962 CG33125
688	1	1	0	0	0	0	1	1	2	3	2L	2653112	2660830	CG17301 CG9880 CG17302
689	1	1	0	1	0	0	1	0	9	13	2L	2665110	2763610	CG9879 CG15396 CG31690 CG15398 CG31689 CG2903 CG9961 CG2843 CG3127 CG9894 CG9958 CG9960 CG2848
690	1	2	1	2	0	0	0	0	2	3	2L	2764067	2768166	CG3077 CG2855 CG3069
691	1	6	1	2	0	2	0	2	1	1	2L	2768590	2770066	CG3057
692	1	1	0	0	0	0	1	1	3	3	2L	2770137	2799970	CG2862 CG15399 CG3139
693	1	3	0	3	0	0	1	0	1	1	2L	2805518	2812147	CG16987
694	3	2	3	1	0	0	0	1	6	6	2L	2814634	2844276	CG15400 CG3131 CG3119 CG2973 CG2975 CG18558
695	3	2	1	1	1	0	1	1	1	1	2L	2847632	2848734	CG2983
696	4	1	0	0	3	1	1	0	2	2	2L	2849732	2856706	CG3104 CG2986
697	1	1	0	0	1	0	0	1	3	5	2L	2857159	2878149	CG2991 CG31694 CG8813 CG8814 CG3083
698	1	6	0	0	0	0	1	6	1	1	2L	2878593	2878958	CG31950
699	4	2	0	0	0	0	4	2	1	1	2L	2880706	2885208	CG3059
700	3	4	0	0	0	4	3	0	2	2	2L	2888284	2964853	CG8817 CG3151
701	1	1	0	0	1	0	0	1	1	1	2L	2969773	2972676	CG3178
702	1	3	0	0	0	0	1	3	2	2	2L	2972892	2978501	CG3157 CG3165
703	2	1	0	0	0	0	2	1	2	3	2L	2979697	2992761	CG3733 CG18642 CG3736
704	3	3	0	0	0	0	3	3	1	1	2L	2992964	2998614	CG3558
705	3	6	0	4	1	2	2	0	2	2	2L	3013501	3021506	CG17265 CG17264
706	2	1	1	0	1	0	0	1	1	1	2L	3023235	3026450	CG3542
707	1	1	0	0	0	0	1	1	1	2	2L	3026528	3030581	CG3605 CG17219
708	1	1	0	0	0	0	1	1	5	5	2L	3030582	3039720	CG17257 CG17258 CG17259 CG17260 CG17262
709	1	2	0	1	0	1	1	0	1	1	2L	3040112	3041625	CG17221
710	1	3	0	1	1	0	0	2	2	2	2L	3043973	3068184	CG3524 CG3523
711	2	2	0	0	0	0	2	2	1	1	2L	3068339	3144613	CG9660
712	2	1	0	0	0	0	2	1	2	2	2L	3145125	3159630	CG12400 CG12399
713	1	2	0	1	0	1	1	0	1	1	2L	3159956	3162403	CG8825
714	1	9	0	3	1	0	0	6	1	1	2L	3163647	3168999	CG3488
715	4	2	1	0	0	0	3	2	10	10	2L	3309222	3369231	CG15406 CG3277 CG3326 CG8837 CG33281 CG33282 CG3285 CG15408 CG3327 CG3304
716	1	1	0	1	0	0	1	0	2	2	2L	3373781	3376619	CG15412 CG9662
717	1	2	1	0	0	0	0	2	3	3	2L	3377008	3447591	CG3289 CG3254 CG2772
718	7	1	3	0	1	0	3	1	3	3	2L	3449686	3457058	CG2774 CG12795 CG3248
719	1	2	0	0	0	0	1	2	2	3	2L	3457329	3466111	CG8843 CG3246 CG3241
720	2	2	0	0	0	0	2	2	3	3	2L	3466162	3479621	CG8844 CG3238 CG8846
721	2	3	0	0	0	0	2	3	8	9	2L	3480954	3530286	CG15414 CG3234 CG31954 CG33123 CG17593 CG3213 CG8851 CG8852 CG15415
722	1	3	0	0	0	0	1	3	25	26	2L	3530903	3784129	CG8853 CG10016 CG3242 CG3851 CG2788 CG15418 CG10033 CG2808 CG10017 CG16704 CG3513 CG31779 CG16713 CG16712 CG3604 CG10031 CG2816 CG31778 CG31777 CG33122 CG2818 CG2822 CG10019 CG31959 CG31772 CG10021
723	2	5	0	0	0	2	2	3	1	1	2L	3790663	3802245	CG3921
724	6	5	3	0	2	0	1	5	4	4	2L	3810799	3867507	CG3407 CG16738 CG2939 CG3964
725	3	1	0	0	2	0	1	1	9	10	2L	3867714	4121442	CG3980 CG31957 CG3399 CG31774 CG31773 CG15422 CG15423 CG10039 CG12676 CG31962
726	1	1	0	0	0	0	1	1	1	1	2L	4164689	4166101	CG11767
727	1	1	0	0	0	0	1	1	2	2	2L	4186245	4198058	CG31961 CG3714
728	3	1	0	0	0	0	3	1	1	1	2L	4198402	4217852	CG3352
729	2	1	0	0	0	0	2	1	2	2	2L	4224650	4228563	CG3702 CG2960
730	2	3	0	0	0	1	2	2	4	4	2L	4257571	4345411	CG15425 CG15427 CG16857 CG2969
731	1	6	0	6	0	0	1	0	1	2	2L	4352975	4380616	CG15429 CG3048
732	5	6	5	6	0	0	0	0	1	1	2L	4380617	4382719	CG17612
733	6	1	6	0	0	0	0	1	2	2	2L	4382920	4387046	CG3338 CG18013
734	1	6	0	5	0	0	1	1	1	2	2L	4388321	4393814	CG4104 CG3652
735	8	3	7	0	0	2	1	1	6	6	2L	4394198	4444677	CG3054 CG33003 CG3058 CG15431 CG15432 CG15437
736	3	1	0	0	1	1	2	0	1	1	2L	4446662	4448637	CG15438
737	1	2	0	0	1	0	0	2	1	1	2L	4449289	4453004	CG15439
738	1	1	0	0	0	0	1	1	1	1	2L	4453167	4454457	CG15440
739	1	3	0	0	0	0	1	3	2	2	2L	4454665	4456822	CG15434 CG15441
740	1	1	0	0	0	1	1	0	1	1	2L	4457176	4458364	CG15442
741	1	2	0	0	1	1	0	1	1	1	2L	4459004	4459532	CG33002
742	2	3	0	0	1	1	1	2	1	2	2L	4459835	4463437	CG15435 CG15443
743	3	3	0	1	1	1	2	1	10	12	2L	4465200	4794042	CG17840 CG15444 CG33196 CG3355 CG11929 CG12205 CG15634 CG3251 CG15633 CG11928 CG15631 CG15630
744	2	1	0	0	1	0	1	1	1	1	2L	4794549	4796576	CG3294
745	1	1	0	0	0	0	1	1	1	1	2L	4796584	4801923	CG3244
746	1	4	0	0	0	2	1	2	1	2	2L	4813025	4818210	CG15629 CG3225
747	3	2	0	0	1	1	2	1	2	2	2L	4821776	4830670	CG15628 CG2976
748	3	1	0	0	1	0	2	1	1	1	2L	4830968	4834317	CG15627
749	2	2	0	0	0	0	2	2	3	3	2L	4835333	4846764	CG15626 CG12194 CG2950
750	2	7	0	4	0	2	2	1	7	8	2L	4847748	4903889	CG11927 CG2937 CG11926 CG31660 CG11924 CG3008 CG15625 CG3036
751	2	1	0	0	1	1	1	0	3	3	2L	4904068	4936665	CG2837 CG12787 CG15624
752	3	2	2	0	1	1	0	1	2	4	2L	4942748	4949751	CG14044 CG8849 CG3469 CG8873
753	3	3	0	0	1	2	2	1	1	1	2L	4955519	4958292	CG3753
754	2	1	0	0	1	1	1	0	1	1	2L	4958411	4966331	CG31652
755	2	1	0	0	2	0	0	1	1	2	2L	4966332	4968936	CG8882 CG8885
756	2	2	0	0	0	2	2	0	1	2	2L	4969004	4971453	CG3756 CG8886
757	1	2	0	0	1	1	0	1	1	1	2L	4971704	4973687	CG14043
758	2	2	0	0	1	1	1	1	2	2	2L	4973978	4976989	CG3782 CG8890
759	3	3	1	0	1	1	1	2	1	2	2L	4977324	4979377	CG3792 CG8891
760	3	1	0	0	2	1	1	0	3	3	2L	4979536	4991295	CG8892 CG31653 CG3805
761	1	4	0	0	1	1	0	3	1	1	2L	4993641	5009744	CG33113
762	2	2	0	0	1	0	1	2	6	9	2L	5011113	5053027	CG3887 CG16858 CG4145 CG14041 CG31650 CG33995 CG31919 CG9121 CG9124
763	2	1	0	1	0	0	2	0	3	4	2L	5053028	5059816	CG14040 CG14036 CG5825 CG18174
764	1	4	1	0	0	0	0	4	1	1	2L	5060832	5070750	CG14039
765	3	3	0	0	0	0	3	3	2	2	2L	5071038	5093515	CG5827 CG31651
766	2	1	0	0	0	0	2	1	1	1	2L	5094021	5095439	CG5828
767	2	1	0	0	0	0	2	1	1	1	2L	5096227	5098613	CG4230
768	1	3	0	0	0	3	1	0	1	1	2L	5099494	5100178	CG8680
769	1	3	0	0	1	0	0	3	2	2	2L	5102798	5205690	CG14035 CG33715
770	8	1	4	0	0	0	4	1	5	5	2L	5271724	5324927	CG14025 CG14030 CG14029 CG14024 CG14023
771	1	2	0	1	0	0	1	1	2	3	2L	5327241	5338053	CG14028 CG14022 CG14021
772	1	1	0	0	0	0	1	1	2	2	2L	5339225	5365039	CG12512 CG11020
773	1	1	0	0	0	0	1	1	4	4	2L	5404342	5519889	CG6604 CG6634 CG14020 CG7382
774	1	1	0	0	0	0	1	1	1	2	2L	5520258	5523877	CG11024 CG7371
775	1	9	0	1	0	2	1	6	6	11	2L	5525905	5552648	CG31989 CG31648 CG31915 CG7277 CG14016 CG14015 CG7269 CG6944 CG6957 CG14014 CG18269
776	1	1	0	0	0	0	1	1	3	3	2L	5552937	5563502	CG14013 CG6992 CG7234
777	1	1	0	0	0	0	1	1	1	1	2L	5579580	5581116	CG14011
778	1	1	0	0	0	0	1	1	10	10	2L	5587143	5720540	CG7251 CG18266 CG14010 CG31646 CG7235 CG12511 CG7236 CG14007 CG34011 CG11149
779	2	1	0	0	0	0	2	1	1	1	2L	5721059	5723791	CG7238
780	2	1	0	1	0	0	2	0	1	4	2L	5724658	5759810	CG11030 CG14006 CG11147 CG11029
781	2	1	2	0	0	1	0	0	2	3	2L	5762674	5800204	CG11142 CG9171 CG31912
782	1	1	0	0	1	1	0	0	3	3	2L	5800514	5808858	CG14005 CG7239 CG11034
783	1	1	0	0	1	1	0	0	1	1	2L	5817892	5818393	CG31644
784	1	1	0	0	1	1	0	0	4	4	2L	5845352	5904674	CG14004 CG31645 CG8965 CG9021
785	1	1	0	0	1	0	0	1	11	11	2L	5907180	5967498	CG14001 CG9019 CG9042 CG9044 CG13999 CG13998 CG9046 CG13997 CG9048 CG9050 CG13992
786	1	1	0	0	0	0	1	1	1	1	2L	5968597	5969761	CG9064
787	1	1	0	0	0	0	1	1	7	7	2L	5972900	6012338	CG9553 CG9075 CG9078 CG9088 CG9093 CG9092 CG9098
788	1	2	0	0	0	1	1	1	5	5	2L	6013057	6036920	CG11607 CG13996 CG9107 CG9109 CG9115
789	2	1	0	0	1	0	1	1	12	15	2L	6036990	6073962	CG9117 CG31643 CG9127 CG9131 CG12393 CG9135 CG13995 CG9140 CG13994 CG9144 CG9147 CG9150 CG13993 CG9154 CG9159
790	1	1	0	0	0	1	1	0	4	5	2L	6091417	6127762	CG18783 CG9175 CG31641 CG31642 CG9226
791	1	1	0	0	1	0	0	1	1	1	2L	6127866	6130659	CG9227
792	1	1	0	0	0	0	1	1	1	1	2L	6131023	6132484	CG9222
793	1	1	0	0	0	1	1	0	4	4	2L	6139461	6208884	CG13991 CG13990 CG31639 CG31640
794	1	1	0	0	1	1	0	0	1	1	2L	6255876	6256526	CG9486
795	1	2	0	0	1	0	0	2	2	3	2L	6263557	6322251	CG13983 CG33531 CG13984
796	1	1	0	0	0	0	1	1	7	7	2L	6325268	6356498	CG9491 CG9493 CG11567 CG9497 CG9498 CG9499 CG9501
797	1	1	0	0	0	0	1	1	1	1	2L	6367884	6370195	CG9505
798	1	1	0	0	0	0	1	1	11	11	2L	6372415	6455934	CG9506 CG13981 CG33295 CG9507 CG9508 CG9511 CG13982 CG11527 CG9523 CG9527 CG9528
799	1	4	0	2	0	2	1	0	2	2	2L	6456106	6463843	CG9526 CG16947
800	1	1	0	0	1	0	0	1	2	2	2L	6468538	6476972	CG9535 CG9536
801	1	1	0	0	0	0	1	1	6	9	2L	6477178	6526996	CG9539 CG9537 CG9542 CG9543 CG9548 CG31638 CG9547 CG9550 CG31637
802	3	1	0	0	0	0	3	1	5	6	2L	6527449	6564398	CG9554 CG9595 CG11015 CG11043 CG9596 CG31911
803	1	3	0	3	0	0	1	0	1	1	2L	6565170	6566117	CG13766
804	2	6	2	3	0	2	0	1	1	1	2L	6568390	6601066	CG11319
805	1	6	0	1	0	2	1	3	2	2	2L	6611408	6618476	CG11050 CG11320
806	2	2	0	0	0	0	2	2	2	2	2L	6635545	6654583	CG31635 CG11098
807	2	6	0	3	0	0	2	3	2	2	2L	6656670	6662035	CG31636 CG11070
808	1	9	0	4	0	0	1	5	3	6	2L	6663965	6684357	CG11181 CG9232 CG11331 CG11330 CG11329 CG11328
809	1	2	0	0	0	1	1	1	5	6	2L	6684905	6731346	CG11327 CG11326 CG11325 CG11188 CG11324 CG11199
810	2	7	0	2	1	1	1	4	7	8	2L	6732866	6796780	CG11201 CG11323 CG11221 CG31910 CG11321 CG17378 CG9258 CG9261
811	4	1	0	0	2	0	2	1	4	4	2L	6801363	6839005	CG17377 CG11236 CG17375 CG31632
812	1	1	0	0	0	0	1	1	1	1	2L	6852324	6853876	CG10800
813	1	2	0	0	0	0	1	2	4	4	2L	6854170	6907817	CG10805 CG10806 CG13772 CG13773
814	1	2	0	0	0	0	1	2	1	1	2L	6911338	6914137	CG4488
815	1	2	0	2	0	0	1	0	2	4	2L	6914300	6926122	CG10203 CG32829 CG10206 CG10377
816	1	1	1	0	0	0	0	1	4	4	2L	6932685	6950135	CG18304 CG10158 CG9211 CG9207
817	1	2	0	2	0	0	1	0	1	2	2L	6950440	6956872	CG3423 CG13775
818	2	3	2	2	0	0	0	1	1	1	2L	6957010	6958970	CG3430
819	2	2	1	0	0	0	1	2	5	6	2L	6958971	6971736	CG9200 CG10399 CG9188 CG3433 CG4494 CG8749
820	1	3	0	0	0	0	1	3	1	1	2L	6973530	6985013	CG9138
821	3	4	0	3	0	1	3	0	4	5	2L	7013496	7028959	CG13776 CG31628 CG3440 CG31908 CG3476
822	2	2	0	0	2	0	0	2	3	4	2L	7030480	7054854	CG9100 CG11266 CG13777 CG31630
823	2	1	0	0	0	1	2	0	6	7	2L	7056306	7156697	CG13778 CG13779 CG8902 CG11289 CG13780 CG31629 CG13783
824	2	2	1	0	1	0	0	2	3	4	2L	7182236	7204259	CG4495 CG4496 CG4497 CG4502
825	2	1	0	0	0	0	2	1	11	11	2L	7205250	7388248	CG13784 CG4567 CG31906 CG4675 CG13786 CG4698 CG4889 CG4969 CG4971 CG5125 CG5149
826	1	1	0	1	0	0	1	0	12	12	2L	7388676	7462247	CG5155 CG5160 CG5171 CG5177 CG5181 CG5229 CG5261 CG5958 CG5973 CG12789 CG13787 CG13788
827	1	2	1	1	0	0	0	1	1	1	2L	7466550	7472205	CG6055
828	2	4	1	0	0	0	1	4	2	3	2L	7472505	7483823	CG15819 CG6441 CG6630
829	4	2	0	0	0	1	4	1	4	4	2L	7497805	7616528	CG33529 CG13790 CG13791 CG6739
830	2	1	0	0	1	0	1	1	3	5	2L	7643527	7692676	CG13792 CG6772 CG6976 CG18585 CG7025
831	1	1	0	0	0	1	1	0	1	1	2L	7693800	7701585	CG7052
832	1	2	0	0	1	0	0	2	3	3	2L	7702807	7732656	CG7068 CG7075 CG13796
833	1	2	0	1	0	1	1	0	4	4	2L	7734411	7747874	CG31904 CG7216 CG7214 CG7211
834	3	3	1	0	2	0	0	3	4	5	2L	7752168	7778027	CG7203 CG7196 CG14538 CG7191 CG7179
835	3	1	0	0	0	0	3	1	1	1	2L	7781503	7782627	CG7164
836	1	2	0	0	0	0	1	2	1	1	2L	7782857	7786063	CG7154
837	1	1	0	0	0	0	1	1	5	5	2L	7786157	7810697	CG7149 CG7144 CG14536 CG7138 CG7134
838	1	2	0	0	0	0	1	2	1	1	2L	7811440	7820774	CG7123
839	1	2	0	0	0	1	1	1	2	2	2L	7821534	7827252	CG7115 CG7111
840	4	2	1	1	1	0	2	1	1	1	2L	7827743	7832745	CG7109
841	2	2	1	1	0	0	1	1	1	1	2L	7840481	7841262	CG14537
842	2	3	1	0	0	0	1	3	7	8	2L	7846818	7976190	CG14535 CG14534 CG7105 CG7104 CG7102 CG18591 CG7093 CG7233
843	5	1	1	0	1	0	3	1	3	3	2L	7983920	7998139	CG7231 CG7228 CG7227
844	3	2	0	0	0	0	3	2	2	2	2L	8011407	8028379	CG7356 CG7367
845	2	2	0	0	0	0	2	2	2	2	2L	8029464	8038517	CG7380 CG7392
846	1	4	0	0	0	0	1	4	1	2	2L	8041115	8042856	CG7429 CG7424
847	2	1	0	0	0	0	2	1	5	6	2L	8043715	8124001	CG7466 CG14472 CG7562 CG7586 CG31605 CG8683
848	1	6	0	0	0	2	1	4	1	1	2L	8127024	8133990	CG8668
849	2	1	0	0	0	1	2	0	1	3	2L	8134247	8159575	CG8552 CG31607 CG31900
850	1	1	0	0	1	0	0	1	2	2	2L	8159839	8162325	CG8506 CG8498
851	1	1	0	0	0	0	1	1	2	3	2L	8173070	8196893	CG8486 CG18103 CG8475
852	1	1	0	0	0	0	1	1	4	5	2L	8197196	8210920	CG8460 CG8455 CG8451 CG8419 CG8409
853	1	3	0	0	0	1	1	2	6	7	2L	8211363	8220737	CG8396 CG8372 CG8360 CG8353 CG8349 CG8292 CG8282
854	2	1	0	0	0	0	2	1	5	5	2L	8221119	8302983	CG8222 CG14277 CG8086 CG8049 CG7870
855	1	2	0	0	0	0	1	2	1	1	2L	8303433	8305376	CG7851
856	2	3	0	0	0	0	2	3	2	5	2L	8305590	8316862	CG7840 CG7830 CG7818 CG7810 CG7806
857	2	1	0	0	0	0	2	1	1	1	2L	8316863	8319920	CG7795
858	1	2	0	0	0	0	1	2	1	2	2L	8320324	8325299	CG7787 CG7781
859	1	3	0	0	0	0	1	3	5	5	2L	8327458	8355173	CG14275 CG14274 CG14273 CG7778 CG31901
860	5	2	0	0	1	0	4	2	5	5	2L	8355674	8374257	CG7627 CG13389 CG13383 CG17291 CG17292
861	2	2	0	1	0	0	2	1	1	2	2L	8374481	8376777	CG17293 CG13390
862	4	1	2	1	0	0	2	0	1	1	2L	8377051	8378208	CG17294
863	3	1	3	0	0	0	0	1	3	4	2L	8378256	8384132	CG13391 CG13392 CG17295 CG13393
864	2	2	0	1	0	1	2	0	3	3	2L	8384467	8399972	CG13384 CG17814 CG13386
865	1	2	0	0	1	0	0	2	4	4	2L	8401446	8415245	CG13396 CG13387 CG13397 CG13398
866	1	1	0	0	0	1	1	0	2	2	2L	8415690	8433598	CG13388 CG17610
867	1	3	0	0	1	0	0	3	3	4	2L	8434058	8445660	CG13400 CG13399 CG10890 CG31897
868	3	4	0	0	0	0	3	4	1	1	2L	8445861	8449571	CG13401
869	5	1	0	1	0	0	5	0	7	7	2L	8449683	8514864	CG17608 CG9233 CG13087 CG10595 CG13094 CG13096 CG13097
870	1	2	1	0	0	0	0	2	1	2	2L	8515098	8517377	CG13089 CG13098
871	1	1	0	0	0	0	1	1	1	1	2L	8517446	8519180	CG13090
872	1	2	0	0	0	0	1	2	2	2	2L	8521899	8528618	CG10593 CG18042
873	1	2	0	0	0	1	1	1	1	1	2L	8529143	8541462	CG17834
874	3	1	1	0	1	0	1	1	1	1	2L	8543333	8667428	CG18405
875	1	1	0	0	0	1	1	0	1	1	2L	8672043	8676811	CG9280
876	1	2	0	0	1	1	0	1	1	1	2L	8676848	8679782	CG9287
877	2	1	0	1	1	0	1	0	2	2	2L	8681403	8685954	CG9289 CG9296
878	1	3	1	1	0	2	0	0	1	1	2L	8686280	8687034	CG9298
879	2	1	0	0	2	1	0	0	1	1	2L	8687281	8691213	CG9310
880	1	1	0	0	1	1	0	0	1	1	2L	8705572	8707442	CG9314
881	1	1	0	1	1	0	0	0	1	1	2L	8709870	8735793	CG12437
882	2	1	2	0	0	0	0	1	2	2	2L	8752400	8829670	CG12438 CG18024
883	1	1	0	0	0	0	1	1	1	1	2L	8862807	8863679	CG32986
884	1	1	0	0	0	0	1	1	8	9	2L	8863842	8943264	CG32987 CG32983 CG9483 CG15867 CG9487 CG9494 CG9496 CG9510 CG9515
885	3	1	1	0	1	0	1	1	1	1	2L	8943454	8951200	CG9520
886	1	2	0	1	0	0	1	1	9	10	2L	8953481	8993310	CG31886 CG9525 CG32985 CG32984 CG18088 CG9541 CG13101 CG18662 CG9552 CG9555
887	3	1	2	1	0	0	1	0	3	5	2L	8994463	9011344	CG17906 CG9556 CG18661 CG9564 CG9568
888	1	1	1	1	0	0	0	0	1	1	2L	9012193	9014151	CG13102
889	1	1	1	1	0	0	0	0	9	10	2L	9024450	9251008	CG9582 CG31708 CG12439 CG31609 CG13106 CG32982 CG13108 CG9586 CG13109 CG17009
890	1	1	1	1	0	0	0	0	1	1	2L	9251455	9253116	CG4454
891	1	2	1	0	0	1	0	1	2	2	2L	9256561	9330033	CG3694 CG17005
892	2	3	0	2	1	0	1	1	2	2	2L	9330767	9341625	CG3738 CG3747
893	2	6	1	3	0	3	1	0	7	7	2L	9373025	9435341	CG13111 CG4450 CG3752 CG3759 CG3763 CG4435 CG3766
894	2	3	1	0	1	2	0	1	2	2	2L	9435510	9463293	CG3769 CG3779
895	3	2	1	0	1	1	1	1	2	2	2L	9491918	9520714	CG4422 CG33298
896	2	2	0	1	0	0	2	1	1	1	2L	9521215	9540045	CG3811
897	2	2	1	0	0	0	1	2	4	4	2L	9540644	9547297	CG17855 CG3818 CG13113 CG13114
898	1	3	0	0	0	0	1	3	1	1	2L	9547762	9566750	CG4405
899	2	2	0	0	0	0	2	2	7	8	2L	9568892	9623115	CG3838 CG4389 CG12245 CG3841 CG4382 CG3858 CG31884 CG3881
900	1	3	0	0	0	1	1	2	3	3	2L	9641350	9699293	CG15828 CG33299 CG4379
901	3	2	0	1	1	0	2	1	11	15	2L	9699834	9775030	CG3949 CG3959 CG4364 CG18660 CG13116 CG13117 CG3998 CG4079 CG4008 CG13120 CG4017 CG17633 CG13121 CG34059 CG34058
902	2	2	1	0	0	2	1	0	1	1	2L	9782390	9788496	CG4026
903	1	5	0	0	1	1	0	4	3	3	2L	9790952	9886214	CG4036 CG13123 CG4128
904	7	3	3	0	1	0	3	3	2	3	2L	9888034	9893419	CG4535 CG4537 CG5924
905	1	2	0	0	0	0	1	2	1	1	2L	9895289	9896106	CG4539
906	1	1	0	0	0	0	1	1	1	1	2L	9896263	9897542	CG5920
907	1	2	0	0	0	0	1	2	10	12	2L	9903386	9933092	CG13124 CG5899 CG4602 CG4600 CG5885 CG4598 CG4594 CG4592 CG13125 CG31711 CG31878 CG31876
908	1	1	0	0	0	0	1	1	14	18	2L	9934749	10055935	CG31712 CG31713 CG4619 CG5853 CG13126 CG4709 CG5846 CG4658 CG5850 CG5838 CG4651 CG4722 CG31755 CG4747 CG4758 CG13131 CG4778 CG33302
909	1	1	0	0	0	0	1	1	2	2	2L	10056906	10063837	CG4799 CG4804
910	1	4	0	0	0	1	1	3	12	12	2L	10064340	10202233	CG31714 CG13133 CG13134 CG13128 CG13129 CG12441 CG34048 CG13136 CG4839 CG5772 CG18145 CG4897
911	5	11	0	8	0	1	5	2	1	1	2L	10419211	10420612	CG5313
912	4	1	0	0	0	0	4	1	1	2	2L	10423315	10426791	CG5168 CG5352
913	1	5	0	0	0	1	1	4	1	1	2L	10426867	10428159	CG5183
914	4	4	0	0	0	0	4	4	1	2	2L	10431344	10435679	CG5193 CG5337
915	5	9	0	0	2	3	3	6	1	1	2L	10435991	10437317	CG5198
916	4	2	0	0	0	0	4	2	1	1	2L	10437551	10439244	CG5203
917	4	1	0	0	2	0	2	1	1	1	2L	10439529	10440626	CG13142
918	1	1	0	0	0	0	1	1	1	1	2L	10442741	10450082	CG6232
919	3	3	1	0	1	0	1	3	1	1	2L	10450134	10452201	CG34042
920	4	1	0	0	1	1	3	0	1	2	2L	10507117	10510461	CG6094 CG7384
921	3	2	0	0	3	0	0	2	1	1	2L	10511252	10517216	CG7400
922	1	2	0	1	0	0	1	1	15	17	2L	10517337	10728560	CG6098 CG6113 CG18301 CG18302 CG31721 CG6138 CG7329 CG31872 CG18284 CG17104 CG7299 CG17108 CG7300 CG7279 CG17116 CG6415 CG6431
923	2	1	1	0	0	0	1	1	2	3	2L	10728975	10732406	CG6443 CG17118 CG6750
924	1	1	0	0	0	0	1	1	2	2	2L	10732818	10736053	CG6444 CG6743
925	2	1	0	0	0	0	2	1	2	2	2L	10737347	10743934	CG12299 CG6729
926	1	1	0	1	0	0	1	0	2	2	2L	10744075	10764972	CG17124 CG6495
927	1	2	1	0	0	0	0	2	9	11	2L	10765562	10850340	CG6720 CG6724 CG17127 CG31869 CG31870 CG6713 CG6700 CG17139 CG17140 CG17137 CG6647
928	2	1	0	0	0	1	2	0	3	4	2L	10851332	10862015	CG17085 CG17086 CG6627 CG6521
929	1	4	0	0	1	1	0	3	1	2	2L	10870240	10876530	CG12517 CG31723
930	2	1	0	0	0	1	2	0	3	3	2L	10982205	10995024	CG6122 CG12253 CG16833
931	2	7	1	0	1	1	0	6	1	1	2L	10997816	11001489	CG6137
932	3	2	1	2	0	0	2	0	5	7	2L	11014031	11090782	CG31868 CG4605 CG14913 CG14915 CG14919 CG14920 CG16854
933	1	2	1	0	0	1	0	1	5	7	2L	11091446	11120314	CG4705 CG6181 CG6192 CG4713 CG6201 CG14916 CG6230
934	1	2	0	1	0	0	1	1	2	4	2L	11120641	11130645	CG14921 CG6249 CG4738 CG6258
935	2	1	1	1	0	0	1	0	3	4	2L	11130741	11148875	CG4751 CG4779 CG33114 CG31867
936	1	10	1	5	0	0	0	5	13	15	2L	11151506	11499119	CG6287 CG33305 CG6320 CG16874 CG4788 CG4807 CG32830 CG33694 CG33695 CG4851 CG16928 CG14925 CG4881 CG6464 CG6488
937	7	1	1	0	0	1	6	0	3	3	2L	11523300	11626136	CG31705 CG31706 CG4977
938	1	1	0	0	1	1	0	0	1	1	2L	11645133	11648839	CG6614
939	1	1	0	0	1	0	0	1	2	2	2L	11652448	11744161	CG4983 CG12602
940	2	4	0	0	0	0	2	4	2	2	2L	11788676	11792365	CG14931 CG14936
941	1	1	0	0	0	0	1	1	2	2	2L	11792402	11809433	CG14937 CG14938
942	1	1	0	0	0	0	1	1	6	13	2L	11810092	11946805	CG14939 CG14940 CG14941 CG31757 CG31704 CG31758 CG14933 CG14934 CG14935 CG14943 CG14944 CG5006 CG16963
943	1	4	0	0	0	1	1	3	2	2	2L	11982003	11988035	CG16965 CG6686
944	3	1	0	0	1	0	2	1	1	1	2L	11988735	11989861	CG12314
945	1	3	0	0	0	1	1	2	2	2	2L	11989964	11992827	CG16969 CG5202
946	3	1	0	0	0	0	3	1	1	2	2L	11999654	12002276	CG12264 CG6746
947	1	2	0	0	0	0	1	2	2	2	2L	12008376	12020938	CG5279 CG6734
948	1	2	0	0	0	1	1	1	2	3	2L	12027440	12038339	CG5304 CG18788 CG6756
949	2	1	0	0	1	0	1	1	2	2	2L	12038613	12045200	CG6766 CG6785
950	1	6	0	0	0	2	1	4	2	2	2L	12045346	12048918	CG6770 CG6792
951	2	2	0	0	0	0	2	2	4	6	2L	12125098	12170656	CG17211 CG17212 CG17213 CG31760 CG31860 CG6583
952	1	2	0	0	0	1	1	1	1	1	2L	12170657	12171196	CG17217
953	2	1	0	0	1	0	1	1	4	5	2L	12172984	12397534	CG17218 CG6579 CG31762 CG31761 CG31763
954	1	1	0	0	0	0	1	1	1	1	2L	12398383	12401636	CG6504
955	1	2	0	0	0	1	1	1	3	3	2L	12403270	12427663	CG31764 CG6405 CG5446
956	2	1	0	0	1	0	1	1	6	7	2L	12428032	12452053	CG6388 CG5435 CG5442 CG6382 CG5427 CG5421 CG6417
957	1	1	0	0	0	0	1	1	1	3	2L	12456577	12540570	CG5461 CG31858 CG31857
958	1	1	0	0	0	0	1	1	3	4	2L	12593788	12686313	CG15489 CG6246 CG12287 CG15485
959	1	1	0	0	0	0	1	1	2	2	2L	12690325	12694984	CG5525 CG5780
960	1	1	0	0	0	1	1	0	1	2	2L	12695038	12698917	CG6167 CG5781
961	3	2	2	0	1	1	0	1	2	2	2L	12699061	12704423	CG17036 CG5776
962	3	2	1	0	1	0	1	2	2	2	2L	12704723	12708684	CG12292 CG6180
963	1	2	0	0	0	0	1	2	1	1	2L	12708785	12712468	CG5787
964	1	3	0	0	0	0	1	3	2	2	2L	12713275	12744809	CG5792 CG6214
965	1	2	0	2	0	0	1	0	1	1	2L	12818930	12822787	CG12283
966	2	2	2	2	0	0	0	0	1	1	2L	12966830	12967788	CG16800
967	2	1	2	0	0	0	0	1	14	14	2L	12974322	13178978	CG3762 CG5075 CG12404 CG12403 CG5092 CG9934 CG9933 CG9932 CG5182 CG5204 CG9828 CG5216 CG16975 CG5439
968	2	6	0	1	0	1	2	4	2	4	2L	13179245	13191949	CG5287 CG31849 CG5458 CG16974
969	1	2	0	0	0	0	1	2	2	4	2L	13192206	13211814	CG5682 CG16972 CG5547 CG15482
970	1	2	0	1	0	0	1	1	2	3	2L	13216290	13222315	CG9426 CG5705 CG15481
971	3	1	2	0	0	0	1	1	4	4	2L	13222561	13230484	CG16812 CG15480 CG16813 CG16815
972	1	1	0	0	0	0	1	1	1	1	2L	13233975	13234595	CG15479
973	1	1	0	0	0	0	1	1	3	3	2L	13236493	13250193	CG5867 CG5945 CG16820
974	1	4	0	3	0	0	1	1	2	2	2L	13255637	13258294	CG31728 CG31851
975	3	2	2	0	0	0	1	2	1	4	2L	13261010	13286409	CG6043 CG31848 CG6108 CG9414
976	3	1	0	0	0	0	3	1	5	6	2L	13286790	13348959	CG6116 CG31729 CG15639 CG16825 CG16970 CG16826
977	1	1	0	1	0	0	1	0	1	1	2L	13350867	13354449	CG9395
978	1	1	1	1	0	0	0	0	1	1	2L	13359901	13361527	CG9377
979	1	1	1	0	0	0	0	1	3	3	2L	13363300	13368936	CG12396 CG6523 CG31852
980	1	1	0	0	0	0	1	1	5	5	2L	13369233	13378546	CG31855 CG9306 CG9305 CG6565 CG9302
981	1	1	0	0	0	1	1	0	3	3	2L	13378897	13387299	CG6699 CG6866 CG9293
982	1	4	0	3	1	0	0	1	12	12	2L	13387636	13500424	CG7099 CG9282 CG16957 CG7110 CG9271 CG16848 CG16956 CG7121 CG9267 CG16849 CG16850 CG31847
983	7	7	5	0	0	4	2	3	1	11	2L	13502656	13547771	CG9239 CG33640 CG33641 CG33642 CG33643 CG33644 CG33645 CG15638 CG16852 CG9263 CG16853
984	10	6	4	1	1	1	5	4	6	7	2L	13550141	13736793	CG7147 CG9031 CG18507 CG31814 CG7311 CG9014 CG31813
985	1	1	0	0	0	0	1	1	3	4	2L	13771087	13783457	CG7364 CG9008 CG7393 CG16890
986	1	1	0	0	0	0	1	1	1	1	2L	13784170	13790569	CG31731
987	1	1	0	0	0	0	1	1	3	4	2L	13790963	13811472	CG16863 CG7578 CG7820 CG16889
988	2	1	0	0	0	0	2	1	1	1	2L	13811526	13812686	CG16865
989	2	1	0	0	0	0	2	1	3	3	2L	13813828	13827793	CG7793 CG7811 CG8987
990	2	2	0	1	0	0	2	1	1	1	2L	13827932	13829739	CG8978
991	2	1	1	0	0	0	1	1	1	3	2L	13829856	13833167	CG7833 CG33649 CG33650
992	1	1	0	0	0	0	1	1	5	12	2L	13833339	13911640	CG7885 CG31842 CG31811 CG33307 CG33306 CG8997 CG7916 CG7953 CG7968 CG8954 CG8827 CG16869
993	1	1	0	0	0	0	1	1	10	14	2L	13914725	14001252	CG17988 CG16886 CG16885 CG16884 CG31841 CG31765 CG33119 CG31839 CG34003 CG33115 CG16873 CG8942 CG18146 CG8930
994	1	1	0	0	0	0	1	1	1	2	2L	14013748	14020301	CG4501 CG16880
995	1	1	0	0	0	0	1	1	10	11	2L	14027010	14328265	CG4500 CG18095 CG16876 CG32975 CG16879 CG15293 CG17341 CG32972 CG4551 CG15288 CG32970
996	1	2	0	1	0	0	1	1	1	1	2L	14328429	14333867	CG15287
997	2	2	1	0	0	0	1	2	3	4	2L	14334160	14351510	CG33090 CG15286 CG18124 CG7532
998	2	1	0	0	0	0	2	1	2	2	2L	14352590	14358400	CG7516 CG4212
999	1	1	0	0	0	0	1	1	1	1	2L	14359218	14361443	CG7480
1000	1	1	0	0	0	0	1	1	1	1	2L	14362068	14365699	CG4215
1001	1	8	0	6	0	2	1	0	6	6	2L	14387122	14549075	CG4220 CG15284 CG3474 CG15283 CG4491 CG4218
1002	1	7	0	5	1	2	0	0	1	3	2L	14599776	14689311	CG3479 CG3484 CG3481
1003	1	4	0	0	1	2	0	2	2	2	2L	14735951	14737766	CG31835 CG31775
1004	4	2	0	0	1	0	3	2	1	1	2L	14758790	14759884	CG4697
1005	2	4	0	1	0	0	2	3	2	2	2L	14761837	14798912	CG4701 CG33308
1006	3	4	1	1	0	0	2	3	1	1	2L	14840925	14847678	CG15279
1007	3	2	1	0	0	0	2	2	3	3	2L	14867108	14877581	CG4480 CG15278 CG4479
1008	2	1	0	0	0	0	2	1	6	6	2L	14878030	15003333	CG4478 CG15277 CG33515 CG4482 CG10846 CG4140
1009	1	1	0	0	0	0	1	1	2	2	2L	15003748	15005526	CG4185 CG4103
1010	1	1	0	0	0	0	1	1	2	3	2L	15005870	15028120	CG3688 CG15274 CG33310
1011	1	1	0	0	0	0	1	1	3	4	2L	15031400	15053777	CG4182 CG4180 CG3497 CG7595
1012	1	6	0	0	0	1	1	5	7	10	2L	15054848	15243761	CG3710 CG3506 CG4170 CG33678 CG15270 CG15269 CG3647 CG4168 CG3994 CG33911
1013	1	1	0	0	0	0	1	1	7	7	2L	15252580	15332079	CG15266 CG31732 CG11861 CG15261 CG15262 CG15259 CG3758
1014	1	1	0	0	0	0	1	1	1	1	2L	15356927	15357517	CG15258
1015	1	1	0	0	0	0	1	1	2	2	2L	15382264	15421514	CG18482 CG4158
1016	1	1	0	0	0	0	1	1	1	1	2L	15429291	15431179	CG4161
1017	1	1	0	0	0	0	1	1	1	1	2L	15472522	15474198	CG3956
1018	1	2	0	0	0	0	1	2	1	1	2L	15480697	15490133	CG15257
1019	2	1	0	1	0	0	2	0	7	7	2L	15495039	15612262	CG4162 CG15256 CG4192 CG15255 CG11864 CG15254 CG15253
1020	1	1	1	1	0	0	0	0	1	1	2L	15624613	15625445	CG7631
1021	1	1	1	0	0	0	0	1	1	1	2L	15626013	15628554	CG18480
1022	1	2	0	0	0	2	1	0	3	3	2L	15643764	15746983	CG4587 CG3938 CG13240
1023	1	1	0	0	1	1	0	0	4	5	2L	15748182	15769048	CG4152 CG3903 CG3793 CG18801 CG31826
1024	2	2	1	1	1	0	0	1	1	1	2L	15848602	15849993	CG13243
1025	2	1	1	0	0	0	1	1	1	1	2L	15850055	15852383	CG4767
1026	1	1	0	0	0	0	1	1	6	11	2L	15896970	16044555	CG31821 CG7644 CG4793 CG12448 CG18063 CG31736 CG10839 CG4838 CG13245 CG31820 CG4824
1027	1	1	0	0	0	0	1	1	2	2	2L	16045924	16091873	CG4846 CG4891
1028	1	1	0	0	0	0	1	1	2	2	2L	16129437	16133442	CG4892 CG4959
1029	1	2	0	0	0	0	1	2	2	2	2L	16166586	16241388	CG4894 CG12455
1030	1	1	0	0	0	0	1	1	1	1	2L	16241755	16253532	CG4993
1031	2	3	0	0	0	0	2	3	1	2	2L	16253922	16257804	CG4930 CG4965
1032	2	3	0	0	0	1	2	2	2	2	2L	16258052	16283657	CG4935 CG7664
1033	7	1	0	0	1	0	6	1	5	6	2L	16284221	16298881	CG4132 CG13258 CG4163 CG5876 CG17328 CG5869
1034	3	3	0	0	0	0	3	3	4	6	2L	16299189	16321372	CG4249 CG5861 CG4214 CG5855 CG4274 CG5848
1035	1	6	0	0	0	3	1	3	1	2	2L	16323000	16325057	CG4278 CG5818
1036	7	1	2	0	2	0	3	1	7	9	2L	16338357	16481599	CG5813 CG4455 CG5809 CG17330 CG5888 CG4472 CG4475 CG4559 CG4952
1037	1	1	0	0	0	0	1	1	3	3	2L	16487471	16539194	CG4599 CG5953 CG31816
1038	3	2	0	0	0	0	3	2	6	7	2L	16545229	16676674	CG5968 CG13260 CG31815 CG4631 CG31738 CG5996 CG4711
1039	4	1	0	0	1	0	3	1	1	1	2L	16676675	16695855	CG17161
1040	1	2	0	0	0	2	1	0	1	5	2L	16711787	16726889	CG13263 CG17903 CG17332 CG31812 CG17996
1041	1	5	0	1	1	2	0	2	1	1	2L	16727142	16728058	CG17331
1042	3	1	0	0	1	1	2	0	10	11	2L	16734781	16797514	CG17905 CG13277 CG17912 CG17914 CG13278 CG17927 CG13279 CG17928 CG13270 CG13271 CG17932
1043	1	2	0	1	1	1	0	0	3	6	2L	16797950	16829829	CG13280 CG13272 CG31991 CG13281 CG31739 CG13282
1044	1	3	0	1	1	1	0	1	1	1	2L	16831189	16833147	CG13283
1045	2	1	0	1	1	0	1	0	3	3	2L	16839121	16857348	CG13284 CG31809 CG6012
1046	1	2	1	0	0	0	0	2	1	1	2L	16874530	16875204	CG32832
1047	2	1	0	0	0	0	2	1	2	2	2L	16875446	16883870	CG31743 CG6115
1048	3	1	0	0	1	0	2	1	4	5	2L	16884932	16988971	CG15133 CG15134 CG4841 CG33179 CG31806
1049	1	2	0	0	0	0	1	2	1	1	2L	17007476	17008983	CG6304
1050	2	1	0	0	0	0	2	1	3	3	2L	17098361	17256661	CG31784 CG12621 CG15138
1051	1	2	0	0	0	0	1	2	1	1	2L	17287099	17288136	CG6380
1052	2	2	0	1	0	0	2	1	1	1	2L	17363438	17380076	CG6860
1053	2	1	1	0	0	0	1	1	1	2	2L	17380862	17406297	CG5020 CG6840
1054	1	2	0	0	0	0	1	2	1	3	2L	17406586	17424124	CG15141 CG31803 CG6794
1055	2	5	0	0	0	1	2	4	1	1	2L	17456763	17469184	CG6605
1056	2	3	0	0	0	0	2	3	2	2	2L	17469412	17473815	CG5094 CG6582
1057	2	1	0	0	0	0	2	1	3	3	2L	17474370	17480231	CG6549 CG5110 CG6453
1058	3	1	0	0	0	0	3	1	16	18	2L	17480447	18079537	CG5131 CG6433 CG15142 CG6412 CG5526 CG15143 CG5545 CG6870 CG5559 CG15147 CG7100 CG7527 CG5674 CG15148 CG31740 CG15151 CG5711 CG31783
1059	1	1	0	0	0	0	1	1	2	2	2L	18080197	18088167	CG31741 CG15153
1060	1	1	0	0	0	0	1	1	1	1	2L	18110612	18110950	CG15152
1061	1	1	0	0	0	1	1	0	2	3	2L	18118475	18134139	CG5758 CG31785 CG7210
1062	1	2	0	1	1	0	0	1	1	1	2L	18134597	18148339	CG15154
1063	2	2	0	0	0	0	2	2	1	2	2L	18151972	18154605	CG5783 CG7200
1064	1	1	0	0	0	1	1	0	4	5	2L	18157358	18211782	CG31746 CG7180 CG15157 CG31802 CG31786
1065	1	1	0	0	1	1	0	0	1	1	2L	18280865	18281613	CG31787
1066	1	1	0	1	1	0	0	0	2	3	2L	18290833	18388519	CG5790 CG5803 CG7157
1067	1	1	1	0	0	0	0	1	1	1	2L	18438427	18439166	CG10305
1068	1	1	0	0	0	0	1	1	1	1	2L	18440436	18444925	CG12750
1069	1	2	0	0	0	0	1	2	1	1	2L	18445443	18450516	CG10302
1070	2	1	0	0	0	0	2	1	4	4	2L	18468882	18509266	CG10283 CG10176 CG10275 CG10178
1071	2	5	0	1	0	0	2	4	7	8	2L	18513422	18608171	CG10211 CG10231 CG15159 CG15160 CG10393 CG10413 CG10333 CG10414
1072	3	6	1	0	0	2	2	4	4	5	2L	18610268	18671023	CG15161 CG15162 CG10391 CG31790 CG31791
1073	2	1	0	1	0	0	2	0	4	6	2L	18673132	18694500	CG31751 CG10387 CG10385 CG10336 CG10383 CG10338
1074	1	2	1	0	0	0	0	2	2	3	2L	18694648	18700386	CG10341 CG10376 CG10343
1075	5	2	0	0	1	0	4	2	1	1	2L	18700499	18701628	CG10373
1076	1	2	0	1	0	0	1	1	3	3	2L	18702190	18709464	CG10372 CG10346 CG10369
1077	3	2	0	1	0	0	3	1	8	9	2L	18710759	18827070	CG10348 CG15167 CG31753 CG10570 CG17325 CG17324 CG17323 CG17322 CG17597
1078	2	2	1	0	0	0	1	2	1	1	2L	18827145	18829562	CG17320
1079	5	3	0	0	0	0	5	3	1	1	2L	18830427	18835596	CG10600
1080	4	1	2	0	1	1	1	0	1	1	2L	18837328	18840486	CG33120
1081	1	3	0	0	1	0	0	3	2	2	2L	18841113	18855141	CG17321 CG10602
1082	2	4	0	0	0	1	2	3	2	2	2L	18855444	18939877	CG10619 CG18397
1083	2	1	0	0	0	0	2	1	5	5	2L	18944826	18964650	CG10428 CG10679 CG10621 CG10623 CG10637
1084	1	2	0	0	0	0	1	2	6	7	2L	18964961	18991859	CG18398 CG10639 CG10431 CG10641 CG15168 CG15170 CG10650
1085	4	4	0	0	1	0	3	4	2	2	2L	19023641	19029424	CG10446 CG10653
1086	1	2	0	0	0	1	1	1	1	1	2L	19029586	19030385	CG31800
1087	3	1	0	0	1	0	2	1	2	3	2L	19037643	19044108	CG10449 CG15173 CG10473
1088	1	1	0	0	0	0	1	1	1	2	2L	19045008	19047535	CG10470 CG10655
1089	2	3	0	0	0	1	2	2	3	3	2L	19047759	19058978	CG10484 CG10492 CG10493
1090	6	5	0	0	2	0	4	5	1	1	2L	19059254	19060655	CG10495
1091	3	7	0	0	0	2	3	5	3	3	2L	19060922	19070075	CG17343 CG10702 CG17572
1092	2	2	0	0	1	0	1	2	7	9	2L	19075163	19127881	CG10699 CG17344 CG10501 CG10561 CG10697 CG10691 CG10689 CG10563 CG10687
1093	1	2	0	0	0	0	1	2	3	3	2L	19128258	19168501	CG17347 CG10685 CG10719
1094	1	3	0	0	0	0	1	3	13	16	2L	19179886	19426199	CG17566 CG10739 CG17348 CG17564 CG10750 CG17559 CG13086 CG17349 CG17350 CG15825 CG17549 CG17544 CG31794 CG9976 CG33533 CG13085
1095	3	3	0	0	0	1	3	2	3	4	2L	19426586	19439330	CG9987 CG9994 CG10237 CG10234
1096	3	2	0	0	1	0	2	2	5	5	2L	19439331	19480631	CG9999 CG10223 CG10026 CG10034 CG10195
1097	1	1	0	0	0	0	1	1	7	8	2L	19480902	19504689	CG13084 CG13083 CG10194 CG18094 CG10189 CG10084 CG10123 CG10188
1098	7	1	0	0	2	0	5	1	3	3	2L	19504878	19522253	CG10186 CG10132 CG10166
1099	3	2	0	0	0	0	3	2	1	2	2L	19522615	19528921	CG10137 CG10165
1100	2	4	0	2	0	0	2	2	5	7	2L	19529402	19552384	CG33116 CG31697 CG13082 CG13081 CG10360 CG10337 CG10363
1101	3	2	1	0	0	0	2	2	4	4	2L	19560267	19575041	CG13078 CG13077 CG10334 CG10364
1102	3	2	0	0	0	1	3	1	1	2	2L	19575042	19578426	CG10268 CG10263
1103	5	1	0	0	3	0	2	1	1	1	2L	19578955	19579856	CG10262
1104	2	1	0	0	0	0	2	1	2	3	2L	19580188	19727491	CG10366 CG10443 CG31695
1105	1	1	0	0	0	0	1	1	10	10	2L	19728097	19791758	CG10462 CG10447 CG10631 CG10628 CG10463 CG31692 CG10604 CG10538 CG10466 CG10528
1106	1	4	0	0	0	0	1	4	9	11	2L	19823203	19967745	CG13958 CG33316 CG10481 CG13964 CG10662 CG10664 CG13965 CG16772 CG18806 CG10658 CG13966
1107	1	1	0	1	0	0	1	0	2	2	2L	20023844	20056904	CG13968 CG10726
1108	2	1	2	0	0	0	0	1	2	4	2L	20057406	20071408	CG10895 CG10728 CG13969 CG16784
1109	2	1	0	0	0	0	2	1	1	3	2L	20071685	20087149	CG10718 CG10746 CG10747
1110	2	1	0	0	0	0	2	1	1	2	2L	20087622	20089775	CG10721 CG10756
1111	3	1	0	0	0	0	3	1	1	1	2L	20089893	20092182	CG10722
1112	2	3	0	0	0	0	2	3	3	3	2L	20092360	20099992	CG10757 CG10723 CG13970
1113	1	1	0	0	0	1	1	0	2	3	2L	20282300	20337603	CG12617 CG10076 CG10922
1114	1	1	0	0	1	0	0	1	4	4	2L	20341563	20404511	CG10043 CG16798 CG10947 CG10949
1115	1	1	0	0	0	0	1	1	2	2	2L	20404654	20412192	CG10954 CG15130
1116	2	7	0	0	0	1	2	6	3	3	2L	20416620	20440131	CG31688 CG31683 CG31687
1117	5	1	0	0	0	0	5	1	1	1	2L	20629896	20630837	CG17470
1118	1	1	0	0	0	0	1	1	4	5	2L	20630941	20646768	CG2488 CG2608 CG2611 CG2478 CG2614
1119	1	1	0	0	0	0	1	1	1	2	2L	20646769	20666901	CG31678 CG2615
1120	1	1	0	0	0	0	1	1	3	3	2L	20669963	20714144	CG2617 CG1864 CG9316
1121	1	2	0	0	0	0	1	2	1	1	2L	20714736	20717845	CG9317
1122	1	2	0	0	0	0	1	2	2	2	2L	20718238	20727372	CG9318 CG2637
1123	1	1	0	1	0	0	1	0	1	1	2L	20738527	20739933	CG9319
1124	1	8	1	4	0	4	0	0	1	2	2L	20739993	20745584	CG9320 CG9323
1125	2	3	0	0	2	0	0	3	2	3	2L	20745959	20776472	CG1768 CG1759 CG9324
1126	2	2	0	0	0	0	2	2	1	1	2L	20776473	20784633	CG9326
1127	5	1	0	0	2	0	3	1	5	5	2L	20797708	20820376	CG9328 CG33322 CG9331 CG31673 CG31674
1128	1	5	0	1	0	2	1	2	9	9	2L	20820451	20910443	CG9333 CG31676 CG9335 CG9336 CG9338 CG31675 CG14401 CG9339 CG9342
1129	2	5	0	0	1	1	1	4	1	1	2L	20912568	20913737	CG9273
1130	5	5	1	0	1	5	3	0	9	10	2L	21040425	21091922	CG1762 CG9265 CG9264 CG33511 CG33510 CG33509 CG33508 CG9259 CG12050 CG9257
1131	2	9	0	1	2	1	0	7	2	2	2L	21092192	21129945	CG9256 CG1099
1132	1	1	0	0	0	0	1	1	2	3	2L	21194113	21208160	CG8681 CG8678 CG8679
1133	1	3	0	0	0	0	1	3	1	2	2L	21208929	21221628	CG8677 CG31626
1134	1	2	0	0	0	1	1	1	1	1	2L	21224830	21245814	CG8676
1135	2	2	0	0	1	1	1	1	1	1	2L	21248752	21249880	CG8674
1136	3	2	1	2	1	0	1	0	2	3	2L	21250554	21297599	CG8671 CG18362 CG31622
1137	2	3	2	0	0	2	0	1	7	7	2L	21298447	21377940	CG8669 CG8667 CG8666 CG31623 CG31620 CG8665 CG8663
1138	2	1	0	0	1	0	1	1	2	2	2L	21560971	21576948	CG3305 CG12548
1139	4	1	1	0	1	0	2	1	5	5	2L	21602356	21664823	CG2201 CG2207 CG1506 CG1512 CG2225
1140	1	2	0	0	0	0	1	2	1	1	2L	21665690	21669743	CG2238
1141	1	10	0	3	0	1	1	6	1	1	2L	21672129	21716644	CG31619
1142	5	1	1	0	2	0	2	1	1	1	2L	21728844	21745054	CG11628
1143	1	3	0	0	0	1	1	2	10	10	2L	21745595	22060268	CG1416 CG31612 CG1374 CG11629 CG1421 CG1428 CG11634 CG12630 CG31601 CG31702
1144	3	4	0	0	1	1	2	3	1	1	2L	22067265	22068312	CG6691
1145	3	3	0	0	1	0	2	3	1	1	2L	22092473	22093099	CG15219
1146	2	2	0	0	0	0	2	2	1	1	2L	22096557	22097942	CG6675
1147	2	1	0	0	0	0	2	1	2	2	2L	22109429	22117735	CG3651 CG15218
1148	1	1	0	0	0	0	1	1	2	2	2L	22121944	22150580	CG6448 CG15216
1149	1	2	0	0	0	0	1	2	1	1	2L	22153557	22156735	CG1832
1150	2	8	0	1	0	1	2	6	2	2	2L	22175481	22201858	CG5929 CG5922
B-cent	9	-	4	-	1	-	4	-
C-cent	-	8	-	4	-	1	-	3
1151	2	7	0	0	0	3	2	4	1	1	2R	1205242	1207608	CG17337
1152	3	2	0	0	0	0	3	2	2	2	2R	1209495	1234218	CG8390 CG8376
1153	1	2	0	0	0	0	1	2	1	1	2R	1261916	1263441	CG12792
1154	1	2	0	0	0	1	1	1	1	1	2R	1265443	1267779	CG7791
1155	3	1	1	0	0	0	2	1	10	12	2R	1268256	1522141	CG7897 CG11163 CG12754 CG7796 CG14469 CG14470 CG7881 CG7838 CG11680 CG7873 CG14471 CG12051
1156	1	1	0	0	0	0	1	1	1	1	2R	1522142	1527537	CG7865
1157	2	1	0	0	0	1	2	0	2	2	2R	1533661	1547723	CG33131 CG14591
1158	1	1	0	0	1	0	0	1	1	1	2R	1550043	1552352	CG7861
1159	2	1	0	0	0	0	2	1	6	6	2R	1564745	1593008	CG7856 CG14593 CG7845 CG7849 CG14590 CG7843
1160	1	1	0	0	0	0	1	1	4	5	2R	1598168	1703395	CG1765 CG14589 CG8343 CG11211 CG11212
1161	1	1	0	0	0	0	1	1	1	1	2R	1710131	1712591	CG30431
1162	1	1	0	0	0	0	1	1	2	2	2R	1714606	1721506	CG17994 CG8325
1163	1	1	0	0	0	0	1	1	2	2	2R	1721961	1762654	CG8276 CG12110
1164	1	4	0	0	0	1	1	3	4	4	2R	2014072	2148075	CG9397 CG9403 CG3161 CG3152
1165	2	4	0	0	1	2	1	2	1	1	2R	2148331	2154174	CG3274
1166	3	1	0	0	2	1	1	0	1	1	2R	2154230	2156893	CG3174
1167	1	1	0	0	1	0	0	1	1	1	2R	2160554	2164644	CG33134
1168	1	2	0	0	0	1	1	1	2	2	2R	2165046	2168263	CG30443 CG3183
1169	2	4	0	0	1	0	1	4	1	1	2R	2169141	2172437	CG3273
1170	1	3	0	0	0	0	1	3	1	1	2R	2172463	2173931	CG3189
1171	3	2	0	0	1	0	2	2	10	14	2R	2174082	2227678	CG15845 CG15908 CG9410 CG3194 CG3271 CG17266 CG9422 CG30445 CG15909 CG30446 CG3270 CG3403 CG3269 CG3409
1172	1	1	0	0	0	1	1	0	11	13	2R	2228158	2321542	CG9428 CG9430 CG9432 CG3268 CG3267 CG3265 CG3420 CG9436 CG3427 CG9438 CG15235 CG3283 CG15237
1173	1	1	0	0	1	1	0	0	1	1	2R	2321888	2322250	CG3450
1174	1	1	0	0	1	0	0	1	2	2	2R	2322833	2328818	CG3287 CG18584
1175	1	2	0	0	0	1	1	1	1	1	2R	2340171	2350173	CG15236
1176	2	1	0	0	1	0	1	1	6	6	2R	2373814	2436494	CG9446 CG9447 CG9453 CG9460 CG30158 CG3358
1177	1	1	0	0	0	1	1	0	2	6	2R	2438294	2486799	CG33558 CG33351 CG33350 CG33349 CG3567 CG30157
1178	1	1	0	0	1	0	0	1	3	5	2R	2487095	2516074	CG3572 CG30156 CG17002 CG18817 CG30159
1179	1	1	0	0	0	0	1	1	1	1	2R	2518260	2520435	CG12847
1180	1	1	0	0	0	0	1	1	1	1	2R	2521673	2523667	CG12846
1181	1	1	0	1	0	0	1	0	24	27	2R	2524069	2735193	CG10106 CG12845 CG12142 CG12844 CG12843 CG33914 CG12143 CG12841 CG12840 CG2374 CG12839 CG12838 CG4471 CG4445 CG12832 CG12837 CG12836 CG12831 CG12833 CG12835 CG4486 CG12172 CG1865 CG1859 CG1857 CG30384 CG11084
1182	1	1	1	0	0	0	0	1	8	8	2R	2744652	2825163	CG1854 CG1851 CG11086 CG1850 CG1845 CG12165 CG11101 CG12164
1183	2	1	0	0	1	0	1	1	3	6	2R	2831367	2904962	CG17800 CG30500 CG30501 CG1708 CG11107 CG1712
1184	1	1	0	0	0	0	1	1	1	1	2R	2905359	2907761	CG1707
1185	2	1	0	0	0	0	2	1	1	1	2R	2910037	2919634	CG11166
1186	1	1	0	0	0	0	1	1	3	5	2R	2930845	2956439	CG11121 CG11145 CG11123 CG11124 CG30503
1187	3	2	0	0	0	0	3	2	3	4	2R	2956836	2970676	CG1669 CG30502 CG11125 CG11143
1188	4	2	0	0	1	0	3	2	1	1	2R	2972240	2975196	CG11141
1189	4	5	0	3	0	2	4	0	5	6	2R	2975197	3008279	CG11127 CG11139 CG11140 CG1624 CG1621 CG1620
1190	1	2	0	0	1	0	0	2	2	2	2R	3008514	3020389	CG1616 CG2146
1191	2	6	0	3	0	1	2	2	1	2	2R	3020390	3024537	CG12736 CG1605
1192	8	1	3	0	3	0	2	1	3	4	2R	3025883	3037521	CG1603 CG1602 CG2144 CG10667
1193	2	2	0	0	0	1	2	1	1	1	2R	3037931	3041098	CG1600
1194	2	2	0	0	1	1	1	1	1	1	2R	3047732	3050110	CG2137
1195	2	1	0	0	1	0	1	1	2	2	2R	3066686	3077562	CG2105 CG30499
1196	1	2	0	0	0	0	1	2	6	9	2R	3077683	3164596	CG30498 CG2093 CG1363 CG1360 CG2092 CG1358 CG30492 CG30494 CG1341
1197	1	1	0	0	0	0	1	1	2	4	2R	3164597	3175072	CG17985 CG30491 CG30495 CG2070
1198	1	2	0	0	0	0	1	2	2	3	2R	3175599	3180842	CG2065 CG2064 CG12042
1199	2	2	0	0	0	0	2	2	3	4	2R	3182363	3188165	CG12826 CG1577 CG12107 CG1406
1200	1	1	0	0	0	0	1	1	1	1	2R	3188880	3198897	CG1399
1201	1	1	0	0	0	0	1	1	1	2	2R	3211094	3215316	CG30493 CG30496
1202	1	2	0	0	0	0	1	2	1	1	2R	3216986	3221004	CG1389
1203	5	1	0	0	0	0	5	1	5	5	2R	3227692	3299953	CG1946 CG18812 CG30497 CG1555 CG11217
1204	1	2	0	0	0	0	1	2	1	2	2R	3305065	3318212	CG1925 CG1553
1205	2	4	0	0	0	1	2	3	4	4	2R	3318291	3335381	CG1891 CG1550 CG1882 CG1548
1206	2	1	0	0	1	0	1	1	2	3	2R	3337305	3342210	CG11205 CG18495 CG18853
1207	2	3	0	1	0	0	2	2	12	12	2R	3342324	3444199	CG30382 CG12822 CG12821 CG18654 CG12820 CG30377 CG12159 CG1877 CG15835 CG8791 CG30381 CG8729
1208	2	1	1	0	0	0	1	1	1	1	2R	3444239	3448668	CG8730
1209	1	6	0	4	0	2	1	0	3	6	2R	3448670	3458379	CG8728 CG30380 CG30379 CG14766 CG11165 CG30378
1210	1	4	0	0	1	1	0	3	1	1	2R	3458380	3467580	CG14764
1211	5	2	1	0	2	1	2	1	2	5	2R	3467581	3483862	CG2906 CG2915 CG2910 CG14763 CG8726
1212	3	3	0	1	2	0	1	2	7	7	2R	3483988	3525567	CG8725 CG11198 CG8722 CG11194 CG11191 CG8719 CG14762
1213	2	2	1	0	0	0	1	2	1	1	2R	3543446	3554349	CG18455
1214	1	2	0	0	0	0	1	2	4	4	2R	3565639	3594183	CG12769 CG8715 CG12770 CG8717
1215	1	1	0	1	0	0	1	0	3	4	2R	3594791	3610267	CG8714 CG17975 CG8713 CG8712
1216	1	1	1	0	0	0	0	1	3	3	2R	3610498	3634665	CG11210 CG8711 CG30372
1217	1	1	0	0	0	0	1	1	1	2	2R	3634829	3639055	CG2158 CG8710
1218	1	2	0	0	0	0	1	2	5	6	2R	3639444	3668463	CG2160 CG11508 CG2163 CG2297 CG8709 CG11546
1219	1	1	0	0	0	0	1	1	1	1	2R	3673492	3675326	CG8707
1220	4	1	0	0	1	0	3	1	1	1	2R	3675761	3676479	CG30373
1221	1	1	0	0	0	0	1	1	1	1	2R	3676698	3679582	CG2173
1222	1	1	0	0	0	0	1	1	2	3	2R	3679760	3685426	CG2183 CG11482 CG14757
1223	2	1	0	0	0	0	2	1	3	3	2R	3718331	3752143	CG33087 CG8704 CG8705
1224	1	1	0	0	0	0	1	1	1	1	2R	3766069	3768549	CG14760
1225	1	1	0	0	0	0	1	1	12	12	2R	3772459	3908111	CG2291 CG30376 CG30375 CG30371 CG14755 CG11635 CG30364 CG30366 CG30363 CG30362 CG2127 CG11641
1226	1	2	0	2	0	0	1	0	5	5	2R	3908206	3947831	CG2121 CG2038 CG11650 CG8697 CG2043
1227	2	2	2	2	0	0	0	0	3	4	2R	3949470	3959281	CG2044 CG2110 CG2060 CG8696
1228	3	1	3	1	0	0	0	0	1	1	2R	3959282	3961558	CG2062
1229	2	5	2	0	0	1	0	4	8	8	2R	3965445	4083958	CG8694 CG8695 CG8693 CG30359 CG30360 CG11669 CG30361 CG2397
1230	3	3	1	0	0	1	2	2	5	5	2R	4085181	4111744	CG14748 CG14747 CG14752 CG8736 CG8735
1231	3	3	0	0	1	0	2	3	1	2	2R	4112246	4125724	CG8643 CG8642
1232	2	1	0	0	0	0	2	1	2	2	2R	4127921	4137997	CG8639 CG14750
1233	1	1	0	1	0	0	1	0	4	4	2R	4139690	4194604	CG14749 CG8635 CG2411 CG8732
1234	1	1	1	1	0	0	0	0	4	4	2R	4203263	4213607	CG8579 CG8586 CG8738 CG8584
1235	1	1	1	1	0	0	0	0	2	2	2R	4213648	4224530	CG12376 CG14743
1236	1	4	1	0	0	0	0	4	3	4	2R	4225257	4235650	CG8577 CG14745 CG14767 CG30357
1237	4	1	0	1	0	0	4	0	3	6	2R	4236073	4367450	CG8411 CG8739 CG8740 CG33141 CG30352 CG30350
1238	1	1	1	0	0	0	0	1	4	5	2R	4372204	4412014	CG10844 CG8272 CG8269 CG8266 CG8262
1239	1	1	0	0	0	0	1	1	2	2	2R	4412376	4416604	CG13746 CG8261
1240	1	2	0	0	0	0	1	2	3	4	2R	4416655	4425939	CG8258 CG30349 CG8252 CG8251
1241	5	2	0	0	0	0	5	2	3	3	2R	4426341	4434564	CG11770 CG8248 CG8247
1242	2	1	0	0	0	0	2	1	2	2	2R	4434601	4438703	CG8243 CG8237
1243	1	2	0	0	0	1	1	1	3	3	2R	4438826	4445921	CG8235 CG8232 CG13749
1244	3	1	0	0	0	0	3	1	1	1	2R	4446430	4451566	CG13745
1245	3	1	0	0	0	0	3	1	4	5	2R	4452282	4464002	CG13748 CG8230 CG8229 CG33199 CG8226
1246	1	2	0	0	0	0	1	2	1	1	2R	4464156	4473449	CG8224
1247	1	1	0	0	0	0	1	1	5	5	2R	4474977	4525321	CG8216 CG8213 CG11824 CG8181 CG8172
1248	1	1	0	1	0	0	1	0	6	6	2R	4526319	4571719	CG13744 CG13747 CG8170 CG8196 CG8193 CG13743
1249	1	2	1	0	0	1	0	1	4	4	2R	4572436	4599370	CG8197 CG8084 CG8083 CG13742
1250	1	1	0	0	0	1	1	0	2	4	2R	4599674	4610280	CG12759 CG8080 CG13741 CG8078
1251	1	3	0	1	1	0	0	2	3	3	2R	4610383	4621536	CG8777 CG8075 CG8073
1252	3	1	1	0	0	1	2	0	2	2	2R	4623314	4627850	CG8070 CG8069
1253	1	1	0	1	1	0	0	0	2	3	2R	4627939	4643794	CG8068 CG11784 CG18659
1254	1	4	1	1	0	0	0	3	1	2	2R	4644352	4649763	CG8058 CG8057
1255	1	2	0	0	0	0	1	2	5	5	2R	4653957	4676763	CG8055 CG30342 CG30344 CG8008 CG8046
1256	1	3	0	0	0	0	1	3	2	3	2R	4677548	4688993	CG2412 CG8016 CG8014
1257	2	3	0	0	0	1	2	2	2	2	2R	4689677	4703908	CG8024 CG8026
1258	3	2	0	0	0	2	3	0	1	1	2R	4707027	4711685	CG1650
1259	1	2	0	0	1	0	0	2	1	1	2R	4716221	4718934	CG8027
1260	2	6	0	0	0	3	2	3	4	7	2R	4719376	4796910	CG8029 CG2040 CG1944 CG10842 CG10843 CG30343 CG2049
1261	3	1	0	0	1	0	2	1	2	2	2R	4803670	4820489	CG1975 CG2078
1262	2	1	0	0	0	1	2	0	3	3	2R	4829354	4910563	CG13739 CG13954 CG8801
1263	1	1	0	0	1	0	0	1	1	1	2R	4910902	4911567	CG13951
1264	1	3	0	0	0	0	1	3	2	2	2R	4912360	4929661	CG8804 CG8805
1265	3	2	0	0	0	0	3	2	8	8	2R	4938255	5015003	CG8808 CG11804 CG13952 CG33758 CG33757 CG13953 CG8809 CG1916
1266	2	2	0	0	0	0	2	2	4	4	2R	5021703	5049289	CG12933 CG12932 CG30336 CG30337
1267	2	4	0	0	0	1	2	3	6	7	2R	5056985	5096358	CG1888 CG12931 CG1809 CG1884 CG1874 CG1814 CG1868
1268	5	1	0	0	0	0	5	1	14	15	2R	5096480	5122097	CG1818 CG12929 CG1821 CG12928 CG1827 CG1825 CG12927 CG1863 CG33479 CG30338 CG30340 CG30339 CG1902 CG30000 CG12926
1269	1	4	0	0	0	0	1	4	7	9	2R	5123504	5318678	CG1794 CG1782 CG1772 CG30004 CG1776 CG18345 CG1690 CG1688 CG1698
1270	1	1	0	0	0	0	1	1	3	3	2R	5323198	5330348	CG1648 CG1652 CG1656
1271	1	3	0	0	0	0	1	3	2	2	2R	5334890	5345361	CG1625 CG1623
1272	2	2	0	0	1	0	1	2	2	3	2R	5350246	5354322	CG12924 CG1665 CG1599
1273	2	5	0	2	0	0	2	3	3	5	2R	5354511	5368221	CG1667 CG1584 CG1519 CG1671 CG1516
1274	2	2	0	0	0	0	2	2	1	2	2R	5375633	5377396	CG30010 CG10536
1275	2	2	0	0	0	0	2	2	1	1	2R	5377462	5378347	CG1675
1276	10	1	0	0	2	1	8	0	4	5	2R	5410807	5471425	CG1441 CG2346 CG12140 CG1429 CG15863
1277	1	3	0	0	1	0	0	3	1	2	2R	5471426	5476875	CG12130 CG1418
1278	4	1	0	0	2	0	2	1	2	2	2R	5480773	5484596	CG12131 CG12134
1279	1	3	0	0	0	0	1	3	1	1	2R	5491054	5492592	CG2328
1280	3	2	0	0	1	0	2	2	2	2	2R	5500974	5537848	CG2331 CG15862
1281	1	2	0	0	0	0	1	2	1	2	2R	5538654	5544701	CG12128 CG1407
1282	1	3	0	1	0	2	1	0	1	1	2R	5545107	5546514	CG12129
1283	1	1	0	0	1	1	0	0	3	4	2R	5561296	5575526	CG2249 CG12918 CG1385 CG2264
1284	1	1	0	0	1	0	0	1	1	1	2R	5579030	5580507	CG1362
1285	1	1	0	0	0	0	1	1	1	2	2R	5580922	5587455	CG12920 CG1371
1286	1	1	0	1	0	0	1	0	1	1	2R	5590178	5596032	CG12919
1287	1	2	1	0	0	0	0	2	1	1	2R	5599387	5608229	CG2269
1288	2	1	0	1	0	0	2	0	2	2	2R	5610329	5621500	CG1381 CG17870
1289	1	6	1	0	0	2	0	4	1	1	2R	5621553	5629004	CG4001
1290	3	3	0	0	0	0	3	3	1	1	2R	5629506	5633272	CG11866
1291	3	2	0	0	0	0	3	2	1	1	2R	5633299	5634375	CG17753
1292	2	1	0	0	0	0	2	1	9	12	2R	5637159	5773089	CG30011 CG33478 CG18011 CG33135 CG12214 CG33183 CG3454 CG12209 CG12914 CG12913 CG12210 CG12911
1293	1	3	0	1	0	0	1	2	12	13	2R	5778682	5939726	CG12910 CG18408 CG3298 CG12909 CG12905 CG12908 CG12904 CG12901 CG12900 CG12899 CG12898 CG12897 CG12896
1294	3	1	1	0	0	0	2	1	3	4	2R	5941525	5974512	CG11763 CG12895 CG2204 CG18377
1295	1	1	0	0	0	0	1	1	1	1	2R	5977956	5980302	CG12892
1296	1	2	0	0	0	0	1	2	1	1	2R	5980432	5981374	CG11777
1297	2	2	0	0	0	0	2	2	6	7	2R	5981375	6161323	CG12891 CG11761 CG17765 CG12052 CG2368 CG11883 CG16728
1298	1	1	0	1	0	0	1	0	6	7	2R	6161632	6254283	CG11887 CG12934 CG11895 CG7576 CG12309 CG12338 CG7220
1299	1	2	1	0	0	0	0	2	3	3	2R	6254524	6324832	CG7614 CG33144 CG12340
1300	1	7	0	3	0	1	1	3	2	4	2R	6325300	6329237	CG12935 CG7637 CG12936 CG12341
1301	6	1	2	0	2	0	2	1	2	2	2R	6329458	6335780	CG7222 CG12342
1302	1	1	0	0	0	0	1	1	3	3	2R	6335871	6339170	CG12323 CG12938 CG12343
1303	1	2	0	0	0	0	1	2	2	3	2R	6339507	6354633	CG12325 CG12344 CG7686
1304	2	1	0	0	0	1	2	0	1	1	2R	6355001	6390612	CG30015
1305	1	1	0	0	1	1	0	0	1	1	2R	6390882	6391278	CG30016
1306	1	3	0	1	1	1	0	1	2	4	2R	6391661	6400799	CG6751 CG7704 CG11919 CG18003
1307	5	3	0	0	1	0	4	3	2	3	2R	6402722	6413790	CG30020 CG12942 CG7712
1308	3	2	0	0	0	0	3	2	1	1	2R	6419568	6421398	CG12943
1309	1	4	0	1	0	3	1	0	3	3	2R	6425830	6615910	CG12944 CG7722 CG33473
1310	3	1	0	0	3	1	0	0	7	8	2R	6651835	6738389	CG13232 CG13229 CG13231 CG12391 CG13230 CG7734 CG9084 CG7736
1311	1	1	0	0	1	0	0	1	1	1	2R	6742364	6748408	CG30021
1312	1	1	0	0	0	0	1	1	14	14	2R	6749171	6782768	CG13218 CG13228 CG13227 CG13217 CG13216 CG13215 CG9080 CG13226 CG13225 CG9079 CG13224 CG9077 CG9076 CG13222
1313	2	1	0	0	0	0	2	1	9	13	2R	6782997	6813382	CG13214 CG9073 CG9070 CG9067 CG13221 CG9062 CG13220 CG13213 CG18335 CG12390 CG18336 CG13211 CG13210
1314	1	4	0	0	0	1	1	3	5	7	2R	6817828	6851884	CG7741 CG13208 CG12389 CG7745 CG13207 CG13206 CG13209
1315	6	1	0	0	2	0	4	1	4	4	2R	6875426	6886191	CG13201 CG12352 CG30030 CG13204
1316	5	1	0	0	0	0	5	1	1	1	2R	6886193	6887077	CG9035
1317	2	1	0	0	0	0	2	1	6	7	2R	6889886	6923992	CG13203 CG9033 CG13200 CG9027 CG30023 CG30022 CG7759
1318	1	1	0	0	0	0	1	1	2	2	2R	6927849	6958130	CG9023 CG7777
1319	2	2	0	0	0	0	2	2	6	6	2R	6958433	7134917	CG33472 CG7776 CG17835 CG9015 CG10897 CG9006
1320	3	2	0	0	0	0	3	2	2	2	2R	7136095	7161556	CG9005 CG9003
1321	1	3	0	0	0	0	1	3	1	3	2R	7168733	7195259	CG8998 CG13198 CG30035
1322	1	1	0	0	0	1	1	0	1	2	2R	7195380	7204666	CG8238 CG13196
1323	1	1	0	0	1	1	0	0	7	7	2R	7204834	7342704	CG8996 CG13197 CG13195 CG13194 CG13193 CG12443 CG13192
1324	1	3	0	0	1	0	0	3	3	3	2R	7343070	7368231	CG8991 CG8988 CG8271
1325	2	1	0	0	0	0	2	1	1	1	2R	7368526	7376766	CG8274
1326	1	1	0	1	0	0	1	0	1	1	2R	7378440	7379155	CG8986
1327	1	6	1	1	0	1	0	4	1	1	2R	7381102	7382290	CG18188
1328	1	1	0	0	0	0	1	1	8	10	2R	7383783	7484750	CG13185 CG13190 CG8983 CG8280 CG30038 CG8981 CG13189 CG13183 CG13188 CG8979
1329	1	5	0	0	0	1	1	4	4	4	2R	7486581	7504663	CG8290 CG33145 CG8975 CG8972
1330	1	1	0	0	0	0	1	1	1	1	2R	7505040	7507348	CG8298
1331	1	1	0	0	0	0	1	1	1	1	2R	7517385	7535731	CG8967
1332	1	1	0	0	0	0	1	1	1	1	2R	7539053	7541177	CG8964
1333	1	2	0	0	0	0	1	2	3	3	2R	7541488	7552167	CG8889 CG17509 CG8321
1334	1	2	0	0	0	0	1	2	7	7	2R	7553213	7634779	CG8340 CG8344 CG8357 CG8364 CG8888 CG13186 CG30040
1335	2	3	0	0	0	0	2	3	1	1	2R	7655291	7655969	CG8881
1336	2	3	0	0	0	0	2	3	2	2	2R	7656512	7660341	CG8378 CG13178
1337	3	1	0	0	0	0	3	1	4	6	2R	7661633	7687198	CG12367 CG8878 CG8407 CG8877 CG16747 CG8427
1338	1	4	0	1	0	0	1	3	1	2	2R	7690683	7694437	CG8439 CG8862
1339	2	1	0	0	0	0	2	1	12	14	2R	7696547	7813620	CG13176 CG13175 CG33964 CG16792 CG8453 CG8859 CG8457 CG8858 CG8857 CG8854 CG13170 CG13168 CG8472 CG13165
1340	1	3	0	1	0	1	1	1	6	7	2R	7814685	7842165	CG8850 CG13164 CG17739 CG30203 CG30046 CG13163 CG8841
1341	4	7	0	3	1	3	3	1	1	1	2R	7842581	7849729	CG8487
1342	5	2	1	0	3	1	1	1	2	2	2R	7851256	7853448	CG8490 CG34021
1343	2	1	0	0	1	0	1	1	2	2	2R	7853709	7860520	CG8493 CG8839
1344	3	2	0	0	0	0	3	2	12	12	2R	7887503	7925561	CG13160 CG30045 CG30042 CG13155 CG8501 CG8502 CG8836 CG13158 CG8505 CG8510 CG8511 CG30050
1345	1	4	0	0	0	2	1	2	5	5	2R	7925986	7938390	CG33626 CG33627 CG8515 CG13157 CG8834
1346	3	2	0	0	1	1	2	1	1	1	2R	7938892	7941371	CG8520
1347	2	2	0	0	1	0	1	2	1	1	2R	7944354	7947002	CG8831
1348	3	3	0	0	0	0	3	3	1	2	2R	7947809	7952754	CG8830 CG30051
1349	1	2	0	0	0	0	1	2	1	1	2R	7953242	7968830	CG8529
1350	1	2	0	0	0	0	1	2	1	2	2R	7969098	7986114	CG12369 CG8828
1351	1	1	0	0	0	0	1	1	5	5	2R	7986115	8017374	CG8545 CG8550 CG12370 CG8824 CG30044
1352	1	4	0	0	0	0	1	4	2	3	2R	8027437	8034825	CG8819 CG13151 CG8818
1353	6	1	0	0	1	0	5	1	1	3	2R	8044963	8080093	CG8581 CG33752 CG30056
1354	2	2	0	0	0	0	2	2	1	2	2R	8080131	8084942	CG33775 CG8587
1355	2	1	0	0	0	1	2	0	3	4	2R	8084943	8108799	CG8816 CG8592 CG8594 CG8815
1356	1	5	0	0	1	0	0	5	4	4	2R	8109490	8148193	CG8604 CG17759 CG30054 CG8811
1357	3	1	0	0	0	0	3	1	2	4	2R	8148581	8152068	CG33792 CG12372 CG33671 CG33672
1358	6	1	0	0	1	0	5	1	2	2	2R	8152563	8161045	CG8625 CG8785
1359	1	1	0	1	0	0	1	0	1	1	2R	8167212	8168389	CG8778
1360	1	2	1	0	0	0	0	2	2	2	2R	8168714	8175255	CG8632 CG8646
1361	2	2	0	0	0	0	2	2	3	3	2R	8175489	8202072	CG8776 CG8772 CG8771
1362	2	2	0	0	0	0	2	2	8	10	2R	8202516	8273430	CG13148 CG30053 CG30052 CG8768 CG12442 CG12488 CG8767 CG8766 CG12373 CG8764
1363	1	3	0	0	0	0	1	3	1	2	2R	8273453	8276674	CG8657 CG8759
1364	3	1	0	0	1	0	2	1	2	2	2R	8278019	8316997	CG12374 CG17579
1365	1	1	0	0	0	1	1	0	6	6	2R	8356743	8388010	CG17577 CG17584 CG17575 CG30488 CG17574 CG3644
1366	1	2	0	0	1	1	0	1	4	4	2R	8388691	8415302	CG3790 CG3798 CG3821 CG3830
1367	2	1	0	0	1	0	1	1	6	6	2R	8431904	8456278	CG3845 CG13319 CG3850 CG17019 CG13322 CG13320
1368	1	2	0	0	0	0	1	2	4	5	2R	8456279	8523721	CG3879 CG3884 CG13321 CG3886 CG3905
1369	1	1	0	0	0	0	1	1	5	5	2R	8562785	8648362	CG13323 CG13324 CG3915 CG3955 CG13326
1370	1	2	0	0	0	0	1	2	1	1	2R	8649026	8658727	CG17054
1371	2	1	0	0	0	0	2	1	2	3	2R	8658739	8674997	CG3969 CG33007 CG3991
1372	1	5	0	0	0	1	1	4	2	2	2R	8675645	8682513	CG4007 CG4604
1373	3	3	0	2	0	0	3	1	1	2	2R	8735397	8736885	CG4646 CG17059
1374	2	4	1	3	0	0	1	1	1	1	2R	8736886	8738335	CG4643
1375	5	2	4	0	0	0	1	2	1	2	2R	8738336	8746135	CG4654 CG4663
1376	7	1	0	0	1	0	6	1	9	9	2R	8755635	8817379	CG4688 CG4696 CG4712 CG4714 CG17041 CG17042 CG32843 CG4734 CG17047
1377	2	1	0	0	0	0	2	1	2	2	2R	8869716	8893621	CG17048 CG10814
1378	2	1	0	0	0	0	2	1	2	3	2R	8905760	8910539	CG17050 CG17049 CG4740
1379	1	3	0	0	0	0	1	3	1	1	2R	8910540	8915275	CG4744
1380	2	3	0	0	1	0	1	3	3	4	2R	8930882	8952704	CG17034 CG30060 CG4812 CG30061
1381	1	3	0	0	0	0	1	3	2	3	2R	8955218	8969300	CG4832 CG30062 CG4840
1382	4	2	0	1	2	0	2	1	2	2	2R	8969540	9001303	CG5912 CG5970
1383	2	2	1	0	0	1	1	1	3	3	2R	9001508	9018726	CG13329 CG6016 CG6033
1384	5	1	2	0	1	1	2	0	1	3	2R	9018727	9029019	CG17064 CG6061 CG6050
1385	2	3	1	0	1	2	0	1	6	8	2R	9031166	9073254	CG13330 CG33528 CG13331 CG13332 CG6145 CG33156 CG6155 CG13333
1386	3	1	0	0	2	1	1	0	2	2	2R	9087291	9109243	CG13335 CG6191
1387	1	2	0	1	1	0	0	1	2	2	2R	9109556	9114657	CG6197 CG18369
1388	3	1	1	1	0	0	2	0	1	1	2R	9124572	9125085	CG12464
1389	1	1	1	0	0	0	0	1	13	17	2R	9138995	9370207	CG17716 CG13337 CG18368 CG6220 CG6280 CG13338 CG13340 CG6305 CG12295 CG6315 CG13339 CG6329 CG6337 CG6347 CG6357 CG10808 CG6543
1390	1	2	0	0	0	0	1	2	2	3	2R	9372050	9377909	CG13345 CG13343 CG16935
1391	1	1	0	0	0	0	1	1	2	2	2R	9377919	9441410	CG13344 CG18076
1392	1	2	0	0	0	0	1	2	3	5	2R	9458441	9476311	CG6646 CG6671 CG30481 CG33155 CG13349
1393	3	1	0	0	0	0	3	1	1	1	2R	9477088	9483898	CG6692
1394	1	2	0	0	0	2	1	0	1	1	2R	9484254	9485809	CG13348
1395	3	2	0	0	3	0	0	2	3	3	2R	9487504	9499381	CG18568 CG6701 CG13350
1396	3	4	0	0	0	0	3	4	1	2	2R	9499559	9506593	CG8067 CG8085
1397	5	2	0	0	0	0	5	2	1	2	2R	9525105	9576263	CG8118 CG18371
1398	2	1	0	0	0	0	2	1	2	3	2R	9577386	9668590	CG30483 CG13353 CG8233
1399	1	3	0	1	0	0	1	2	1	2	2R	9669063	9673311	CG8241 CG13018
1400	3	4	1	0	0	2	2	2	1	1	2R	9673678	9675344	CG13016
1401	2	1	0	0	1	0	1	1	2	2	2R	9677342	9680776	CG12366 CG8309
1402	4	1	0	0	0	0	4	1	7	8	2R	9684763	9727272	CG18324 CG8331 CG8338 CG8367 CG30069 CG8394 CG8404 CG30071
1403	2	1	0	0	0	0	2	1	1	1	2R	9730098	9731490	CG8415
1404	1	1	0	0	0	0	1	1	1	2	2R	9734785	9750311	CG8468 CG8479
1405	1	2	0	1	0	0	1	1	1	1	2R	9750644	9754290	CG8485
1406	2	1	1	0	0	1	1	0	2	2	2R	9754800	9760929	CG8494 CG8503
1407	1	1	0	0	1	0	0	1	9	9	2R	9761829	9817216	CG8523 CG8542 CG8531 CG8536 CG8547 CG8553 CG8561 CG8585 CG8589
1408	1	1	0	0	0	0	1	1	2	2	2R	9840689	9866670	CG13942 CG8603
1409	1	1	0	1	0	0	1	0	3	3	2R	9867102	9875157	CG8613 CG8617 CG12505
1410	1	2	1	0	0	1	0	1	11	12	2R	9877957	9938510	CG8151 CG30070 CG30067 CG30073 CG30072 CG30074 CG13939 CG8422 CG10104 CG17385 CG10105 CG17386
1411	2	1	0	0	1	0	1	1	1	1	2R	9942199	9947198	CG10108
1412	1	2	0	0	0	0	1	2	2	2	2R	9957102	9980320	CG17388 CG17390
1413	1	1	0	0	0	0	1	1	2	2	2R	9996066	10018336	CG10109 CG10110
1414	1	1	0	0	0	1	1	0	1	1	2R	10018872	10027309	CG8787
1415	1	1	0	0	1	0	0	1	1	2	2R	10027405	10030071	CG10112 CG30197
1416	1	1	0	0	0	0	1	1	1	3	2R	10041434	10100184	CG10117 CG30076 CG10119
1417	1	2	0	0	0	0	1	2	1	1	2R	10106066	10110477	CG12869
1418	2	2	0	0	0	0	2	2	2	3	2R	10110478	10119215	CG10122 CG30077 CG10128
1419	1	1	0	0	0	1	1	0	3	3	2R	10119499	10121822	CG12868 CG33469 CG33468
1420	1	1	0	0	1	0	0	1	1	1	2R	10122280	10132908	CG12864
1421	1	2	0	0	0	0	1	2	1	1	2R	10133590	10134547	CG10130
1422	1	3	0	0	0	2	1	1	1	1	2R	10134658	10136175	CG12863
1423	3	3	0	0	2	0	1	3	8	10	2R	10255229	10284285	CG12858 CG10146 CG18372 CG10149 CG30476 CG10151 CG12859 CG10153 CG12857 CG10155
1424	1	2	0	0	0	1	1	1	8	9	2R	10285333	10367513	CG10159 CG10197 CG12856 CG10200 CG10202 CG10205 CG10207 CG10209 CG10212
1425	2	1	0	0	0	0	2	1	2	4	2R	10367828	10373469	CG10215 CG12797 CG12855 CG33506
1426	2	2	0	0	0	0	2	2	2	2	2R	10373704	10385931	CG33505 CG10228
1427	6	1	0	0	1	0	5	1	3	3	2R	10386555	10392517	CG10240 CG10241 CG10242
1428	1	3	0	0	0	1	1	2	1	1	2R	10392651	10394618	CG10243
1429	6	1	0	0	1	0	5	1	1	1	2R	10396983	10398911	CG10245
1430	2	1	0	0	0	0	2	1	1	1	2R	10400125	10401814	CG10247
1431	3	2	0	0	0	0	3	2	6	8	2R	10402031	10477809	CG10248 CG17453 CG10249 CG10253 CG10255 CG10257 CG10261 CG30475
1432	1	2	0	0	0	0	1	2	1	1	2R	10479051	10495447	CG12424
1433	2	3	0	0	0	0	2	3	1	2	2R	10496158	10507086	CG7761 CG7639
1434	2	1	0	0	0	0	2	1	1	1	2R	10507189	10510065	CG10265
1435	1	2	0	0	0	0	1	2	2	2	2R	10526261	10659646	CG7449 CG11798
1436	1	1	0	0	0	0	1	1	6	6	2R	10662740	10730463	CG7544 CG18285 CG8090 CG11807 CG8092 CG8093
1437	1	3	0	0	0	1	1	2	1	2	2R	10731072	10732476	CG11808 CG12954
1438	5	2	1	0	0	0	4	2	1	3	2R	10733244	10756442	CG8079 CG8094 CG33466
1439	2	1	0	0	0	0	2	1	7	7	2R	10763648	10837032	CG8095 CG30079 CG30078 CG8102 CG8152 CG8153 CG8155
1440	1	3	0	0	0	0	1	3	2	2	2R	10837337	10854183	CG8156 CG16801
1441	4	1	0	0	0	0	4	1	1	1	2R	10865017	10883050	CG8166
1442	1	2	0	0	0	0	1	2	13	15	2R	10883051	11047101	CG8169 CG8171 CG8174 CG18625 CG12958 CG12959 CG8179 CG30470 CG8180 CG12964 CG30469 CG30468 CG30464 CG8182 CG8183
1443	1	1	0	0	0	1	1	0	1	1	2R	11050058	11052513	CG30471
1444	1	2	0	0	1	0	0	2	4	6	2R	11053076	11077309	CG30467 CG8187 CG8186 CG8190 CG8192 CG12963
1445	1	1	0	0	0	0	1	1	1	1	2R	11077557	11080649	CG8195
1446	7	1	3	0	1	0	3	1	4	5	2R	11087999	11203848	CG8204 CG8205 CG8207 CG33139 CG8214
1447	5	3	3	0	1	2	1	1	2	2	2R	11242261	11331672	CG30089 CG30084
1448	3	2	0	0	1	0	2	2	2	2	2R	11370824	11376883	CG12970 CG8256
1449	1	5	0	0	0	0	1	5	1	1	2R	11379167	11384008	CG30085
1450	3	1	1	0	0	0	2	1	2	3	2R	11386282	11446792	CG33464 CG8355 CG8291
1451	2	2	0	0	0	1	2	1	1	1	2R	11447027	11449606	CG8293
1452	2	2	0	0	1	0	1	2	1	2	2R	11449751	11454936	CG8297 CG8295
1453	4	2	0	0	0	0	4	2	1	1	2R	11455564	11456346	CG8299
1454	2	2	0	0	1	0	1	2	6	7	2R	11458975	11507214	CG30093 CG8302 CG18255 CG8366 CG15699 CG8314 CG8315
1455	2	3	0	0	0	0	2	3	1	2	2R	11515986	11522518	CG8370 CG8386
1456	2	6	0	0	0	0	2	6	1	3	2R	11523235	11529643	CG8389 CG8388 CG8392
1457	4	2	0	0	0	0	4	2	6	7	2R	11532602	11617466	CG8399 CG8400 CG8401 CG8403 CG8405 CG18250 CG8414
1458	2	2	0	0	0	0	2	2	2	2	2R	11617780	11624878	CG8416 CG8418
1459	3	10	0	0	0	1	3	9	5	5	2R	11625348	11653101	CG8421 CG8424 CG8425 CG30095 CG8428
1460	4	1	1	0	0	0	3	1	1	1	2R	11657095	11657801	CG30094
1461	3	1	0	0	0	1	3	0	1	2	2R	11658013	11662174	CG8431 CG8433
1462	1	1	0	0	1	0	0	1	3	4	2R	11662175	11691516	CG10731 CG8434 CG8435 CG18243
1463	1	3	0	0	0	0	1	3	2	2	2R	11693667	11700864	CG8440 CG8441
1464	2	1	0	0	0	0	2	1	1	2	2R	11701448	11711165	CG8443 CG8445
1465	1	1	0	1	0	0	1	0	1	1	2R	11711254	11714242	CG8446
1466	1	3	1	0	0	1	0	2	2	2	2R	11714286	11725262	CG18247 CG8448
1467	1	1	0	0	0	0	1	1	2	4	2R	11737044	11748949	CG7798 CG15706 CG3666 CG15701
1468	1	3	0	0	0	0	1	3	3	3	2R	11749221	11755580	CG7786 CG3687 CG15707
1469	1	3	0	0	0	0	1	3	4	4	2R	11755798	11779479	CG15708 CG7779 CG15709 CG7773
1470	3	2	0	0	0	0	3	2	2	2	2R	11779538	11786841	CG3730 CG7765
1471	2	3	0	1	0	0	2	2	1	1	2R	11792652	11793221	CG7760
1472	2	1	1	1	0	0	1	0	3	4	2R	11794877	11803096	CG15704 CG15705 CG7755 CG30324
1473	1	2	1	0	0	1	0	1	4	4	2R	11803134	11808989	CG30099 CG3767 CG30100 CG7747
1474	3	1	0	0	1	0	2	1	4	4	2R	11809265	11835580	CG3615 CG15924 CG3896 CG8060
1475	2	1	0	0	0	0	2	1	4	5	2R	11836412	11859042	CG30096 CG4282 CG8048 CG4311 CG7997
1476	1	4	0	1	0	3	1	0	1	2	2R	11859240	11862361	CG6251 CG7989
1477	1	1	0	0	1	0	0	1	2	4	2R	11874593	11945626	CG6262 CG33960 CG7969 CG7964
1478	1	1	0	0	0	0	1	1	3	3	2R	11948711	11962377	CG7848 CG4409 CG15925
1479	1	1	0	0	0	0	1	1	2	2	2R	11999704	12008099	CG15712 CG4439
1480	1	1	0	0	0	0	1	1	1	1	2R	12011752	12014292	CG7813
1481	1	4	0	0	0	0	1	4	5	6	2R	12031069	12086100	CG4700 CG4750 CG4905 CG8380 CG4945 CG8332
1482	3	2	0	0	0	0	3	2	3	3	2R	12086962	12100311	CG4927 CG8317 CG5072
1483	1	3	0	0	0	1	1	2	1	1	2R	12101908	12104031	CG8311
1484	2	2	1	2	0	0	1	0	1	1	2R	12104382	12109576	CG8306
1485	1	1	1	1	0	0	0	0	1	1	2R	12113611	12115278	CG5089
1486	1	2	1	0	0	0	0	2	10	13	2R	12115279	12280845	CG8303 CG5065 CG8250 CG18471 CG8221 CG8178 CG8098 CG5197 CG30463 CG5210 CG15617 CG8566 CG5267
1487	3	1	0	0	0	0	3	1	1	1	2R	12287779	12288771	CG8905
1488	1	2	0	0	0	0	1	2	3	3	2R	12289283	12298038	CG5409 CG33544 CG15920
1489	4	3	0	0	0	0	4	3	3	3	2R	12298554	12309852	CG5522 CG15919 CG15615
1490	3	1	0	0	1	0	2	1	6	8	2R	12383056	12416441	CG6341 CG6426 CG6421 CG6429 CG6435 CG8910 CG6472 CG6518
1491	1	1	0	0	0	1	1	0	4	4	2R	12439817	12470018	CG6622 CG15614 CG33456 CG33455
1492	1	2	0	0	1	1	0	1	6	7	2R	12470327	12516789	CG6657 CG6665 CG9010 CG6702 CG9002 CG9001 CG9000
1493	2	1	0	0	1	1	1	0	1	2	2R	12516877	12519962	CG6796 CG8980
1494	1	1	0	0	1	0	0	1	1	1	2R	12520316	12522467	CG6805
1495	2	2	0	0	0	0	2	2	1	1	2R	12522769	12530749	CG15609
1496	1	6	0	2	0	1	1	3	3	4	2R	12531189	12559523	CG8963 CG6829 CG9635 CG30459
1497	3	1	0	0	0	0	3	1	2	2	2R	12559819	12563370	CG9640 CG9642
1498	2	2	0	0	0	2	2	0	2	3	2R	12563738	12574168	CG9646 CG6953 CG8961
1499	2	1	0	1	2	0	0	0	2	3	2R	12574726	12590981	CG8950 CG6967 CG30460
1500	1	1	1	0	0	0	0	1	1	1	2R	12603297	12606519	CG8946
1501	1	1	0	0	0	0	1	1	14	14	2R	12606873	12922288	CG6984 CG8938 CG30456 CG15611 CG15605 CG15918 CG11395 CG17290 CG30458 CG30457 CG10953 CG33197 CG10939 CG6568
1502	3	1	0	0	0	0	3	1	1	1	2R	12923258	12925063	CG30101
1503	1	1	0	0	0	0	1	1	2	2	2R	12927637	12934462	CG10938 CG6556
1504	3	1	0	0	0	0	3	1	2	3	2R	12935296	12944174	CG4798 CG6550 CG4802
1505	2	1	0	0	0	0	2	1	5	7	2R	12944212	12984039	CG6546 CG18468 CG6542 CG18467 CG10751 CG14478 CG6522
1506	1	2	0	2	0	0	1	0	5	5	2R	12984495	13010862	CG4816 CG6520 CG4827 CG30104 CG30103
1507	2	2	2	2	0	0	0	0	1	2	2R	13017591	13023510	CG18431 CG4844
1508	2	1	2	0	0	0	0	1	1	1	2R	13027098	13028722	CG4847
1509	1	1	0	0	0	0	1	1	3	4	2R	13029113	13050512	CG4853 CG11419 CG4866 CG33130
1510	2	3	0	0	0	0	2	3	3	3	2R	13051076	13059221	CG4878 CG18432 CG18631
1511	1	2	0	0	0	2	1	0	1	1	2R	13059755	13061258	CG4886
1512	3	1	0	0	3	0	0	1	1	2	2R	13061259	13070517	CG6510 CG4903
1513	1	1	0	0	0	0	1	1	4	5	2R	13071770	13087617	CG15844 CG14480 CG6501 CG4909 CG14482
1514	2	5	0	0	0	2	2	3	1	2	2R	13087745	13096369	CG4921 CG6493
1515	3	1	0	0	1	0	2	1	3	3	2R	13096775	13105745	CG6484 CG14483 CG6477
1516	1	1	0	0	0	0	1	1	4	7	2R	13105829	13169159	CG4924 CG30105 CG4943 CG11423 CG10936 CG10683 CG30106
1517	1	1	0	0	0	0	1	1	1	1	2R	13180541	13184107	CG4954
1518	1	2	0	0	0	1	1	1	2	2	2R	13185045	13187498	CG30109 CG6459
1519	2	2	0	0	1	1	1	1	3	3	2R	13187700	13205415	CG6446 CG14481 CG4966
1520	2	1	0	0	1	0	1	1	1	2	2R	13205416	13213224	CG14485 CG17818
1521	3	1	0	0	1	1	2	0	3	3	2R	13218200	13241663	CG6424 CG10933 CG6410
1522	1	2	0	0	1	0	0	2	2	2	2R	13241835	13247852	CG4975 CG4984
1523	2	3	0	1	0	0	2	2	1	2	2R	13248118	13252127	CG4989 CG6406
1524	4	2	0	0	0	2	4	0	1	1	2R	13252715	13254520	CG6401
1525	1	2	0	0	1	0	0	2	1	1	2R	13254756	13258838	CG4996
1526	1	3	0	0	0	0	1	3	1	1	2R	13259525	13260724	CG14487
1527	6	1	1	0	2	0	3	1	8	10	2R	13263881	13296775	CG10931 CG5002 CG5005 CG5009 CG6370 CG14488 CG18635 CG6362 CG33981 CG6355
1528	1	1	0	0	0	1	1	0	6	9	2R	13301000	13380755	CG5032 CG5788 CG5033 CG5036 CG5058 CG11430 CG14489 CG14490 CG5785
1529	1	1	0	0	1	0	0	1	1	1	2R	13381882	13386873	CG5784
1530	1	1	0	1	0	0	1	0	1	5	2R	13388810	13440455	CG5076 CG30325 CG5779 CG14492 CG14491
1531	1	2	1	0	0	1	0	1	16	17	2R	13491254	13640695	CG33996 CG5084 CG10910 CG5773 CG5770 CG5767 CG34005 CG14495 CG5765 CG10911 CG10912 CG14496 CG14497 CG5757 CG5098 CG5756 CG5753
1532	3	4	0	0	1	1	2	3	1	1	2R	13641168	13643082	CG10913
1533	1	1	0	0	0	0	1	1	4	4	2R	13643363	13661101	CG12767 CG5748 CG5109 CG5119
1534	1	1	0	0	0	0	1	1	1	1	2R	13662160	13662857	CG17680
1535	1	1	0	0	0	0	1	1	1	1	2R	13663309	13666250	CG5742
1536	1	1	0	0	0	0	1	1	1	1	2R	13666567	13668709	CG5124
1537	1	1	0	0	0	0	1	1	1	1	2R	13669184	13673055	CG5738
1538	2	1	0	0	0	0	2	1	1	1	2R	13673130	13675173	CG10914
1539	2	2	0	0	0	0	2	2	2	2	2R	13675580	13681992	CG10915 CG5733
1540	2	1	0	0	0	0	2	1	1	1	2R	13682140	13683243	CG5134
1541	1	5	0	0	0	2	1	3	1	1	2R	13683271	13687470	CG5729
1542	2	1	0	0	0	1	2	0	2	2	2R	13688534	13695032	CG10916 CG5726
1543	1	1	0	0	1	1	0	0	1	2	2R	13695359	13698976	CG5140 CG5721
1544	1	1	0	0	1	0	0	1	24	26	2R	13699649	13955344	CG33958 CG10917 CG5581 CG33198 CG5580 CG14502 CG18536 CG18537 CG18538 CG18539 CG15066 CG18108 CG15067 CG18106 CG16836 CG5154 CG17522 CG17530 CG17531 CG17533 CG17534 CG5576 CG5170 CG5174 CG12263 CG30118
1545	2	1	0	1	0	0	2	0	1	1	2R	13955820	13960395	CG5186
1546	3	2	3	0	0	0	0	2	5	7	2R	13961433	14019707	CG5189 CG5519 CG30120 CG5190 CG17669 CG30116 CG5224
1547	2	2	0	0	0	0	2	2	4	4	2R	14029439	14061871	CG5226 CG10924 CG17725 CG15069
1548	5	1	1	0	2	0	2	1	1	1	2R	14068975	14076498	CG30115
1549	1	1	0	0	0	0	1	1	1	2	2R	14127945	14129879	CG10927 CG5497
1550	2	2	0	0	0	2	2	0	2	5	2R	14129944	14139911	CG5323 CG5327 CG5493 CG5489 CG5335
1551	1	3	0	0	1	1	0	2	1	1	2R	14140130	14142607	CG5341
1552	5	5	0	0	1	2	4	3	1	1	2R	14147192	14154131	CG30122
1553	1	1	0	0	0	0	1	1	2	2	2R	14155886	14175067	CG5473 CG5469
1554	1	1	0	0	0	0	1	1	5	6	2R	14179825	14220675	CG33136 CG15085 CG15086 CG15072 CG15071 CG18604
1555	1	1	0	1	0	0	1	0	1	2	2R	14220845	14225723	CG15073 CG15087
1556	1	1	1	0	0	0	0	1	10	14	2R	14232992	14317262	CG33147 CG15088 CG33998 CG18609 CG17821 CG15077 CG34020 CG15092 CG33148 CG33146 CG15093 CG15080 CG15094 CG15095
1557	1	1	0	0	0	1	1	0	1	1	2R	14323199	14329872	CG15096
1558	1	1	0	1	1	0	0	0	5	6	2R	14334348	14360726	CG15081 CG15097 CG15082 CG15098 CG15083 CG15099
1559	1	1	1	0	0	0	0	1	1	1	2R	14361721	14365542	CG15100
1560	1	3	0	0	0	1	1	2	16	17	2R	14365724	14636821	CG15084 CG18190 CG15101 CG15102 CG15106 CG12763 CG10794 CG30329 CG12758 CG18608 CG15104 CG18605 CG15105 CG15113 CG30126 CG15109 CG16720
1561	8	2	2	2	2	0	4	0	1	2	2R	14644457	14652030	CG15110 CG15118
1562	1	4	1	0	0	0	0	4	1	1	2R	14652240	14655901	CG15111
1563	6	2	0	1	0	0	6	1	2	2	2R	14670059	14693091	CG15112 CG10737
1564	3	3	1	0	0	0	2	3	9	9	2R	14693617	14807066	CG7097 CG7137 CG11949 CG7225 CG7229 CG7230 CG11906 CG11001 CG15119
1565	5	2	2	0	0	0	3	2	1	1	2R	14807431	14818887	CG7417
1566	2	2	0	0	0	0	2	2	1	1	2R	14822303	14825555	CG9834
1567	3	2	0	0	1	0	2	2	9	10	2R	14827005	14904187	CG9811 CG30127 CG34045 CG9975 CG11961 CG10051 CG9416 CG10062 CG10073 CG10081
1568	1	1	0	0	0	0	1	1	1	1	2R	14905044	14906706	CG11257
1569	1	2	0	0	0	2	1	0	2	2	2R	14906719	14911623	CG17246 CG10460
1570	1	4	0	0	1	1	0	3	1	1	2R	14914380	14939812	CG9325
1571	1	2	0	0	0	0	1	2	3	3	2R	14939936	14956762	CG7563 CG10023 CG7626
1572	3	2	0	0	0	1	3	1	2	3	2R	14971037	15001698	CG8201 CG7753 CG11242
1573	2	1	0	0	1	0	1	1	3	3	2R	15001907	15011730	CG11237 CG8432 CG11228
1574	1	1	0	1	0	0	1	0	2	3	2R	15012617	15019131	CG15120 CG16926 CG11007
1575	1	1	1	0	0	0	0	1	4	5	2R	15023030	15146365	CG15121 CG15122 CG15904 CG9218 CG16716
1576	1	1	0	0	0	0	1	1	1	1	2R	15151523	15152161	CG18367
1577	1	1	0	0	0	1	1	0	1	1	2R	15157901	15158476	CG15124
1578	1	1	0	0	1	1	0	0	1	1	2R	15161615	15162431	CG15905
1579	1	1	0	0	1	0	0	1	9	9	2R	15172646	15218658	CG15125 CG9854 CG11025 CG15128 CG15126 CG11797 CG30129 CG30128 CG11218
1580	1	1	0	0	0	0	1	1	1	1	2R	15227208	15227824	CG8462
1581	1	1	0	0	0	0	1	1	10	10	2R	15228939	15727482	CG8517 CG12501 CG13873 CG13874 CG8595 CG13872 CG8654 CG8896 CG11041 CG16894
1582	1	1	0	0	0	0	1	1	1	1	2R	15746694	15749796	CG11044
1583	1	1	0	0	0	0	1	1	2	4	2R	15751098	15760262	CG11099 CG13869 CG11048 CG11208
1584	2	1	0	0	0	0	2	1	3	3	2R	15762993	15776599	CG9864 CG9204 CG11055
1585	1	2	0	0	0	0	1	2	3	3	2R	15776617	15779757	CG9193 CG9183 CG8900
1586	2	3	0	0	0	1	2	2	2	2	2R	15779795	15789388	CG8908 CG10444
1587	2	3	0	0	0	1	2	2	1	1	2R	15789549	15790919	CG11788
1588	2	3	0	0	1	1	1	2	2	3	2R	15790920	15801942	CG9143 CG9090 CG16868
1589	2	1	0	0	1	0	1	1	2	3	2R	15803218	15823502	CG9036 CG8914 CG11200
1590	1	1	0	0	0	0	1	1	2	2	2R	15823575	15833833	CG13868 CG13871
1591	1	5	0	1	0	2	1	2	1	2	2R	15834070	15841669	CG8920 CG13867
1592	4	1	0	0	3	0	1	1	3	3	2R	15842130	15860742	CG8929 CG16739 CG13870
1593	1	1	0	0	0	0	1	1	1	1	2R	15869077	15869886	CG11192
1594	1	1	0	0	0	1	1	0	5	5	2R	15939198	16041689	CG33041 CG30143 CG13421 CG13426 CG13422
1595	1	1	0	0	1	1	0	0	2	2	2R	16048237	16050218	CG30154 CG18067
1596	1	1	0	0	1	0	0	1	5	6	2R	16051441	16066949	CG13423 CG13427 CG30148 CG18066 CG13430 CG18065
1597	3	2	0	0	1	0	2	2	1	2	2R	16071722	16077190	CG13424 CG13431
1598	1	1	0	0	0	1	1	0	2	2	2R	16077898	16102070	CG13432 CG13434
1599	1	1	0	0	1	0	0	1	5	8	2R	16102368	16155549	CG13425 CG30147 CG9945 CG11180 CG16742 CG11175 CG30149 CG13436
1600	1	1	0	0	0	0	1	1	9	10	2R	16155834	16182148	CG9954 CG11110 CG33785 CG33786 CG11132 CG16799 CG11159 CG11136 CG13437 CG9025
1601	1	2	0	0	0	0	1	2	1	1	2R	16183213	16185353	CG8994
1602	1	3	0	0	0	0	1	3	2	2	2R	16186066	16201773	CG30152 CG13441
1603	1	1	0	0	0	0	1	1	3	4	2R	16207733	16289976	CG13438 CG13439 CG13442 CG13443
1604	1	1	0	0	0	0	1	1	2	2	2R	16295899	16301268	CG15226 CG15225
1605	1	1	0	0	0	0	1	1	12	13	2R	16328848	16481574	CG11312 CG9985 CG17999 CG9993 CG15227 CG33990 CG30295 CG9236 CG10036 CG9235 CG10052 CG33152 CG15649
1606	1	1	0	0	0	0	1	1	2	2	2R	16484638	16485819	CG9344 CG15650
1607	7	1	0	0	2	0	5	1	1	1	2R	16486926	16491520	CG9313
1608	2	1	0	0	0	0	2	1	4	5	2R	16491521	16517155	CG15651 CG3216 CG9327 CG10543 CG30291
1609	1	2	0	1	0	0	1	1	3	4	2R	16517348	16532492	CG33133 CG9346 CG3295 CG30296
1610	2	1	1	1	0	0	1	0	2	2	2R	16532662	16564741	CG9350 CG3722
1611	1	1	1	0	0	1	0	0	4	5	2R	16565373	16572545	CG10540 CG15653 CG9353 CG9357 CG30293
1612	2	1	1	0	1	0	0	1	2	2	2R	16572962	16576854	CG3986 CG10531
1613	1	1	0	0	0	0	1	1	1	1	2R	16577645	16580367	CG10527
1614	1	1	0	0	0	0	1	1	2	2	2R	16591923	16598584	CG9364 CG4030
1615	1	1	0	0	0	0	1	1	5	8	2R	16600082	16650779	CG15654 CG15655 CG9398 CG9394 CG4050 CG9401 CG30388 CG9406
1616	1	2	0	0	0	0	1	2	6	7	2R	16651127	16678177	CG9415 CG9418 CG15657 CG30389 CG4266 CG9437 CG4279
1617	1	6	0	3	0	1	1	2	2	3	2R	16678585	16690198	CG9433 CG9441 CG4286
1618	1	2	0	0	0	1	1	1	9	10	2R	16691014	16793251	CG9450 CG15658 CG9480 CG4302 CG15661 CG18375 CG30391 CG15660 CG33949 CG10069
1619	1	5	0	2	0	1	1	2	1	1	2R	16799896	16801058	CG30390
1620	3	3	0	0	2	1	1	2	1	1	2R	16801976	16803169	CG9752
1621	4	1	1	1	2	0	1	0	1	1	2R	16817943	16819930	CG9754
1622	1	2	1	0	0	0	0	2	1	3	2R	16819931	16827151	CG30387 CG30386 CG9485
1623	2	2	0	0	0	0	2	2	1	1	2R	16827620	16831133	CG30394
1624	2	1	0	1	0	0	2	0	6	6	2R	16849567	16893797	CG15666 CG9822 CG17974 CG15671 CG10795 CG9841
1625	1	1	1	0	0	0	0	1	2	2	2R	16893936	16900022	CG9707 CG9709
1626	1	1	0	0	0	0	1	1	5	6	2R	16901199	17026688	CG10497 CG15667 CG9847 CG10496 CG15669 CG10494
1627	2	4	0	0	0	0	2	4	6	6	2R	17055151	17124449	CG10079 CG10440 CG30222 CG10433 CG15673 CG18870
1628	3	2	1	0	1	1	1	1	2	2	2R	17124638	17132024	CG9858 CG9856
1629	1	1	0	0	0	0	1	1	6	8	2R	17132617	17169826	CG10080 CG15674 CG10321 CG10082 CG30284 CG10320 CG9862 CG15678
1630	3	1	0	0	0	1	3	0	2	2	2R	17175109	17179175	CG9865 CG10318
1631	1	1	0	0	1	1	0	0	2	3	2R	17183903	17195222	CG30263 CG10306 CG9874
1632	1	2	0	0	1	0	0	2	1	2	2R	17196494	17198691	CG10307 CG9878
1633	3	1	0	0	1	1	2	0	1	1	2R	17199172	17200311	CG30290
1634	1	1	0	0	1	0	0	1	5	7	2R	17200312	17231641	CG17922 CG17921 CG30403 CG17950 CG30404 CG30398 CG17952
1635	1	1	0	0	0	0	1	1	1	1	2R	17265009	17265560	CG7975
1636	1	1	0	0	0	0	1	1	8	8	2R	17297198	17369546	CG4402 CG18735 CG4386 CG13492 CG34040 CG4363 CG4377 CG9294
1637	1	1	0	0	0	0	1	1	1	1	2R	17372449	17374441	CG13493
1638	1	2	0	0	0	0	1	2	3	3	2R	17388934	17452058	CG3245 CG4054 CG13487
1639	2	2	0	0	0	0	2	2	1	1	2R	17459209	17459986	CG13488
1640	2	2	0	0	0	0	2	2	2	2	2R	17471755	17476862	CG13489 CG13490
1641	1	1	0	0	0	1	1	0	1	1	2R	17480708	17483787	CG9304
1642	1	1	0	0	1	0	0	1	5	6	2R	17484244	17542502	CG13491 CG13495 CG30401 CG33227 CG34004 CG13499
1643	1	1	0	0	0	0	1	1	1	1	2R	17542503	17543531	CG9308
1644	1	2	0	0	0	0	1	2	2	2	2R	17564049	17568242	CG13500 CG13501
1645	2	1	0	0	0	0	2	1	1	1	2R	17577305	17578868	CG11475
1646	1	2	0	0	0	0	1	2	2	4	2R	17578869	17582919	CG6393 CG30327 CG11474 CG2921
1647	1	1	0	0	0	0	1	1	2	3	2R	17583624	17595213	CG6437 CG6562 CG13502
1648	1	2	0	0	0	0	1	2	1	1	2R	17599066	17607308	CG11073
1649	2	1	0	0	0	0	2	1	1	4	2R	17610770	17629901	CG6613 CG13503 CG30280 CG30281
1650	1	1	0	0	0	0	1	1	1	1	2R	17629902	17632150	CG5303
1651	2	2	0	0	0	0	2	2	1	1	2R	17632152	17635079	CG11061
1652	1	2	0	0	0	0	1	2	1	1	2R	17635390	17637770	CG6698
1653	2	2	0	0	0	2	2	0	1	4	2R	17644573	17682320	CG6741 CG11269 CG6727 CG3045
1654	2	2	0	0	2	0	0	2	2	2	2R	17682488	17690232	CG6758 CG11275
1655	1	2	0	0	0	0	1	2	1	1	2R	17690728	17693474	CG5465
1656	4	3	0	0	2	3	2	0	2	3	2R	17693560	17713158	CG5625 CG3074 CG3292
1657	1	2	0	0	1	1	0	1	8	8	2R	17720423	17819502	CG5709 CG30278 CG30277 CG3382 CG3380 CG5799 CG5819 CG3413
1658	2	1	0	1	1	0	1	0	3	4	2R	17830485	17862286	CG5820 CG3425 CG11206 CG11298
1659	1	2	1	0	0	0	0	2	8	8	2R	17882674	17923124	CG10955 CG10382 CG13506 CG3624 CG6044 CG3584 CG11301 CG3613
1660	1	2	0	0	0	2	1	0	2	2	2R	17923395	17927953	CG5821 CG3633
1661	1	2	0	0	1	2	0	0	1	1	2R	17928621	17933064	CG6339
1662	1	2	0	1	1	0	0	1	2	2	2R	17933329	17937166	CG10344 CG10972
1663	2	2	1	0	0	1	1	1	2	2	2R	17974053	17984852	CG10384 CG3701
1664	3	1	1	0	1	0	1	1	1	1	2R	17985969	17990636	CG4752
1665	1	2	0	0	0	0	1	2	1	1	2R	17990923	17999615	CG4554
1666	1	1	0	0	0	0	1	1	1	1	2R	17999796	18001877	CG4610
1667	1	1	0	0	0	0	1	1	4	5	2R	18004080	18113217	CG4444 CG6018 CG12489 CG4269 CG4294
1668	1	1	0	0	0	1	1	0	1	1	2R	18113703	18115583	CG4046
1669	3	1	2	0	1	0	0	1	4	7	2R	18116115	18147745	CG4071 CG4329 CG33143 CG17807 CG5179 CG4207 CG3732
1670	1	2	0	0	0	0	1	2	1	1	2R	18148103	18149000	CG3751
1671	1	2	0	0	0	0	1	2	2	2	2R	18149478	18153928	CG4414 CG2852
1672	1	2	0	0	0	0	1	2	9	9	2R	18154195	18168969	CG30195 CG30219 CG3746 CG4373 CG30196 CG30217 CG13510 CG13511 CG13512
1673	2	1	0	0	0	0	2	1	5	5	2R	18174753	18196555	CG30273 CG30269 CG13516 CG12190 CG9952
1674	1	1	0	0	0	0	1	1	12	14	2R	18200106	18292516	CG13521 CG30259 CG13517 CG13518 CG13524 CG13519 CG30275 CG30268 CG30092 CG3536 CG13526 CG13527 CG13530 CG30270
1675	1	1	0	0	0	0	1	1	2	2	2R	18306636	18314567	CG3612 CG3510
1676	1	1	0	0	0	0	1	1	5	5	2R	18318974	18336445	CG3622 CG30271 CG30266 CG30274 CG30264
1677	1	1	0	0	0	1	1	0	5	6	2R	18337297	18355437	CG30272 CG30265 CG12490 CG9825 CG9826 CG3649
1678	1	1	0	0	1	0	0	1	1	1	2R	18355438	18361297	CG13531
1679	1	1	0	0	0	1	1	0	5	7	2R	18361978	18393932	CG3661 CG3504 CG3668 CG13532 CG3682 CG3501 CG3499
1680	1	1	0	0	1	1	0	0	1	1	2R	18393998	18395177	CG13533
1681	4	1	3	0	1	0	0	1	2	3	2R	18395178	18403346	CG3495 CG3695 CG3700
1682	1	2	0	0	0	0	1	2	1	1	2R	18403773	18424324	CG12781
1683	2	1	1	0	0	0	1	1	6	8	2R	18426536	18506483	CG3820 CG30193 CG30190 CG3800 CG9849 CG3831 CG9897 CG9896
1684	1	3	0	0	0	2	1	1	4	5	2R	18519719	18571864	CG9895 CG2956 CG30194 CG9893 CG9890
1685	2	2	0	0	1	0	1	2	1	2	2R	18582669	18586628	CG3085 CG9882
1686	2	1	0	0	0	0	2	1	13	13	2R	18588161	18752886	CG30189 CG9877 CG9876 CG30186 CG30330 CG12192 CG13545 CG9899 CG30188 CG13548 CG3162 CG3092 CG13549
1687	1	1	0	0	0	0	1	1	2	2	2R	18771869	18781875	CG12782 CG3134
1688	1	1	0	0	0	0	1	1	1	1	2R	18790343	18791703	CG3124
1689	1	1	0	0	0	0	1	1	1	1	2R	18816254	18817416	CG9868
1690	1	2	0	0	0	0	1	2	4	6	2R	18825787	18862830	CG30412 CG9861 CG30417 CG3502 CG9863 CG30409
1691	2	1	0	0	0	0	2	1	1	1	2R	18862831	18863798	CG30410
1692	1	1	0	0	0	0	1	1	1	1	2R	18863969	18865165	CG3500
1693	2	3	0	0	1	0	1	3	1	2	2R	18866358	18873854	CG11079 CG3496
1694	2	1	0	0	1	0	1	1	1	2	2R	18874489	18884612	CG13550 CG3493
1695	1	4	0	0	0	0	1	4	1	1	2R	18885460	18891021	CG13551
1696	2	1	0	0	1	1	1	0	1	1	2R	18893272	18894025	CG30415
1697	1	1	0	0	1	1	0	0	17	20	2R	18894126	19046093	CG10315 CG3530 CG3520 CG9812 CG30411 CG9815 CG9820 CG5357 CG13552 CG3569 CG17226 CG13557 CG18679 CG18678 CG13556 CG13558 CG3906 CG3870 CG5360 CG17632
1698	2	1	1	0	1	0	0	1	1	1	2R	19046231	19048373	CG30181
1699	2	2	0	0	0	1	2	1	3	4	2R	19048654	19055567	CG33151 CG33150 CG30185 CG3957
1700	2	1	0	0	1	0	1	1	5	7	2R	19055840	19107300	CG17280 CG3941 CG5370 CG3931 CG5373 CG30184 CG5393
1701	1	1	0	0	0	1	1	0	8	8	2R	19110185	19192264	CG5398 CG17664 CG17662 CG4019 CG5403 CG5411 CG5428 CG5431
1702	1	1	0	0	1	1	0	0	4	7	2R	19192265	19210001	CG4533 CG11293 CG5472 CG30183 CG12273 CG5479 CG4091
1703	6	2	4	0	2	0	0	2	4	6	2R	19210079	19254425	CG11295 CG4084 CG5504 CG11299 CG18128 CG4051
1704	5	2	0	0	1	0	4	2	4	5	2R	19260364	19316595	CG5532 CG9850 CG13561 CG5539 CG4817
1705	1	2	0	0	0	1	1	1	1	1	2R	19316845	19318984	CG5543
1706	3	1	0	0	2	0	1	1	3	3	2R	19319785	19344940	CG4797 CG4763 CG5549
1707	1	1	0	0	0	0	1	1	2	2	2R	19349057	19352325	CG4735 CG11173
1708	2	2	0	0	0	0	2	2	1	1	2R	19352492	19354624	CG5554
1709	1	6	0	1	0	1	1	4	1	2	2R	19354770	19358696	CG18426 CG17611
1710	1	1	0	0	0	0	1	1	2	3	2R	19359183	19366391	CG5562 CG30170 CG30176
1711	1	2	0	0	0	0	1	2	2	3	2R	19370559	19376216	CG4585 CG5569 CG4581
1712	1	2	0	0	0	0	1	2	1	1	2R	19377875	19385042	CG5575
1713	1	2	0	0	0	0	1	2	1	1	2R	19388417	19390031	CG4882
1714	1	1	0	0	0	1	1	0	1	2	2R	19390032	19391912	CG11303 CG11182
1715	2	1	1	0	1	1	0	0	2	3	2R	19396542	19402587	CG11183 CG5602 CG11184
1716	2	1	1	1	1	0	0	0	1	1	2R	19404490	19405834	CG5339
1717	1	3	1	2	0	0	0	1	1	1	2R	19406179	19411264	CG5591
1718	3	3	2	1	0	1	1	1	1	1	2R	19411577	19412693	CG13562
1719	5	2	1	1	3	1	1	0	1	1	2R	19415728	19432666	CG5594
1720	3	4	1	2	2	2	0	0	1	1	2R	19432839	19434510	CG2812
1721	2	3	1	1	1	2	0	0	1	1	2R	19435080	19441147	CG3725
1722	3	2	2	1	1	1	0	0	1	1	2R	19448013	19449714	CG2827
1723	3	4	1	2	2	2	0	0	1	1	2R	19450141	19454539	CG2835
1724	3	5	2	3	1	2	0	0	1	1	2R	19456801	19460061	CG2970
1725	3	1	2	0	1	0	0	1	1	1	2R	19460117	19461615	CG3803
1726	2	5	0	2	0	2	2	1	1	2	2R	19461693	19465003	CG2980 CG16787
1727	6	4	2	4	2	0	2	0	1	1	2R	19472301	19474348	CG3017
1728	2	6	2	3	0	3	0	0	1	1	2R	19475544	19476544	CG3029
1729	3	7	2	5	1	1	0	1	2	2	2R	19476661	19479833	CG10904 CG3065
1730	5	6	2	1	1	3	2	2	1	1	2R	19480033	19483012	CG3060
1731	4	6	1	4	1	2	2	0	1	1	2R	19486821	19492777	CG3090
1732	2	5	0	2	2	2	0	1	1	1	2R	19496317	19499650	CG3105
1733	9	8	6	7	2	0	1	1	1	1	2R	19503143	19520272	CG33519
1734	10	5	5	3	3	2	2	0	1	1	2R	19525021	19527495	CG3121
1735	6	9	5	8	1	0	0	1	1	1	2R	19527498	19529856	CG3907
1736	9	6	5	4	2	2	2	0	1	1	2R	19538242	19538801	CG30172
1737	3	4	1	4	2	0	0	0	1	1	2R	19539139	19541368	CG3924
1738	4	8	4	7	0	1	0	0	1	1	2R	19541809	19544308	CG3167
1739	6	9	4	7	2	1	0	1	1	1	2R	19544383	19545278	CG13567
1740	3	8	0	5	2	1	1	2	1	1	2R	19545584	19552038	CG3173
1741	6	5	3	4	1	1	2	0	1	1	2R	19568000	19569116	CG3195
1742	4	3	3	2	1	1	0	0	1	1	2R	19569450	19570029	CG3997
1743	3	6	2	6	1	0	0	0	1	1	2R	19570653	19573005	CG3204
1744	4	3	4	1	0	2	0	0	1	1	2R	19573580	19576085	CG4005
1745	7	5	5	2	2	1	0	2	1	1	2R	19576510	19581074	CG3209
1746	6	6	2	4	1	1	3	1	1	1	2R	19585934	19588076	CG10339
1747	9	9	4	3	2	2	3	4	1	1	2R	19590335	19593760	CG16786
1748	4	3	1	2	2	0	1	1	1	1	2R	19594206	19599619	CG3231
1749	2	2	1	0	0	0	1	2	1	1	2R	19599677	19606234	CG4012
1750	11	9	6	4	1	2	4	3	1	1	2R	19607481	19614634	CG11290
1751	10	5	6	0	2	0	2	5	1	1	2R	19615506	19621870	CG4049
1752	2	1	0	0	0	0	2	1	7	10	2R	19624389	19682037	CG3257 CG13569 CG4057 CG3260 CG4065 CG3318 CG12240 CG13570 CG3328 CG4326
1753	6	1	0	0	1	0	5	1	7	8	2R	19682325	19762693	CG3333 CG3363 CG3362 CG3356 CG11406 CG30419 CG30418 CG13576
1754	1	1	0	0	0	0	1	1	9	10	2R	19762989	19910288	CG13575 CG3376 CG3385 CG3394 CG3401 CG4354 CG3411 CG13578 CG4356 CG4527
1755	1	3	0	1	0	0	1	2	2	2	2R	19910571	19918147	CG3416 CG4545
1756	2	1	1	0	0	1	1	0	6	6	2R	19919491	19940296	CG3419 CG30165 CG30164 CG4556 CG30166 CG15874
1757	1	1	0	0	1	1	0	0	1	1	2R	19953100	19954439	CG3483
1758	1	1	0	0	1	0	0	1	1	1	2R	19958682	19960637	CG4563
1759	1	1	0	0	0	0	1	1	2	2	2R	19980312	19982781	CG3492 CG3494
1760	1	2	0	1	0	0	1	1	4	4	2R	19983026	20009834	CG16837 CG13579 CG13580 CG4569
1761	2	2	1	1	0	0	1	1	1	1	2R	20014475	20015313	CG13581
1762	2	2	1	0	0	0	1	2	2	2	2R	20017362	20028747	CG4589 CG13582
1763	5	1	0	0	2	0	3	1	2	3	2R	20033837	20043022	CG30169 CG13585 CG4622
1764	1	1	0	0	0	0	1	1	3	3	2R	20043788	20068687	CG11413 CG13586 CG4634
1765	1	3	0	0	0	0	1	3	4	6	2R	20069228	20085734	CG11414 CG11416 CG12252 CG3511 CG3522 CG33527
1766	1	2	0	0	0	0	1	2	3	4	2R	20085839	20107421	CG4681 CG3541 CG13587 CG4692
1767	2	3	0	0	0	0	2	3	2	2	2R	20107566	20111088	CG3548 CG3565
1768	4	1	0	0	0	1	4	0	1	2	2R	20111212	20114618	CG3570 CG4707
1769	1	2	0	0	1	0	0	2	5	7	2R	20114966	20149837	CG3579 CG13588 CG4741 CG3608 CG13594 CG3616 CG4781
1770	1	2	0	0	0	0	1	2	2	2	2R	20169124	20171006	CG3663 CG30163
1771	1	2	0	0	0	0	1	2	3	3	2R	20171128	20175930	CG30161 CG3683 CG4806
1772	1	1	0	0	0	0	1	1	3	5	2R	20176073	20244253	CG33228 CG3691 CG4859 CG4871 CG33988
1773	3	1	0	0	0	0	3	1	2	2	2R	20251412	20268066	CG30421 CG9196
1774	2	2	0	0	0	0	2	2	3	4	2R	20268363	20275752	CG3880 CG12848 CG3894 CG16936
1775	1	1	0	0	0	0	1	1	10	12	2R	20275914	20306213	CG16932 CG30426 CG30422 CG16914 CG3594 CG16912 CG3589 CG16910 CG2928 CG18105 CG2917 CG12849
1776	1	1	0	0	0	0	1	1	1	1	2R	20306398	20307162	CG3611
1777	1	1	0	0	0	0	1	1	1	1	2R	20322430	20342763	CG3629
1778	2	4	0	0	0	0	2	4	1	2	2R	20379006	20383436	CG16896 CG30423
1779	4	1	0	0	0	1	4	0	6	8	2R	20389169	20435871	CG9047 CG32836 CG10142 CG9071 CG9083 CG2857 CG18506 CG15860
1780	1	1	0	0	1	0	0	1	6	7	2R	20436347	20455975	CG30427 CG3760 CG2811 CG2803 CG15861 CG3770 CG2790
1781	3	1	0	0	0	0	3	1	2	2	2R	20457233	20472683	CG12851 CG2765
1782	3	1	0	0	0	0	3	1	5	6	2R	20476045	20498086	CG2746 CG3776 CG9358 CG2736 CG2727 CG3829
1783	2	5	0	0	0	1	2	4	1	1	2R	20498546	20519073	CG15792
1784	3	2	0	0	0	0	3	2	8	8	2R	20519650	20696437	CG3533 CG3441 CG2692 CG3388 CG2679 CG16778 CG34038 CG9380
1785	7	1	0	0	0	1	7	0	1	1	2R	20734215	20737134	CG3340
1786	1	1	0	0	1	1	0	0	1	1	2R	20754129	20755104	CG30429
1787	1	4	0	0	1	0	0	4	1	1	2R	20756606	20757916	CG33680
1788	1	4	0	0	0	0	1	4	1	1	2R	20760914	20764924	CG30428
C-telo	10	-	2	-	3	-	5	-
D-telo	-	6	-	1	-	1	-	4
1789	1	5	0	2	0	0	1	3	7	7	3L	6478	159758	CG32475 CG13405 CG1210 CG6845 CG7051 CG1212 CG7049
1790	5	1	0	1	1	0	4	0	1	1	3L	159841	162161	CG7047
1791	1	6	1	1	0	2	0	3	1	1	3L	163826	166060	CG13875
1792	3	1	1	0	0	0	2	1	1	2	3L	166061	169849	CG7042 CG6851
1793	2	1	0	0	0	0	2	1	1	1	3L	172081	182119	CG7036
1794	2	3	0	0	0	1	2	2	4	6	3L	183712	196219	CG1216 CG18374 CG7067 CG13876 CG7028 CG17143
1795	2	5	0	0	0	2	2	3	1	1	3L	196241	200015	CG16940
1796	6	1	0	0	3	0	3	1	1	1	3L	217633	230433	CG32346
1797	1	1	0	0	0	0	1	1	3	4	3L	231027	247910	CG32476 CG7020 CG13879 CG7008
1798	2	7	0	2	0	1	2	4	7	7	3L	248314	288826	CG13880 CG1221 CG18321 CG12313 CG13881 CG13882 CG1225
1799	1	6	0	0	0	1	1	5	1	3	3L	313352	330441	CG17084 CG17061 CG6936
1800	7	3	0	0	1	0	6	3	1	2	3L	341370	344915	CG6905 CG16988
1801	4	1	0	0	0	1	4	0	1	1	3L	345010	349213	CG1233
1802	1	1	0	0	1	0	0	1	2	2	3L	350055	376356	CG6883 CG13885
1803	2	4	0	1	0	0	2	3	1	1	3L	417790	524121	CG17046
1804	6	1	1	0	0	0	5	1	1	1	3L	524383	525682	CG17180
1805	1	3	0	0	0	0	1	3	3	3	3L	529603	572804	CG17090 CG12169 CG17181
1806	1	4	0	0	0	0	1	4	1	2	3L	576778	587533	CG12031 CG13893
1807	1	5	0	0	0	2	1	3	1	1	3L	588697	590090	CG3200
1808	1	1	0	0	0	0	1	1	4	4	3L	632049	641507	CG12030 CG3402 CG17183 CG12189
1809	1	4	0	0	0	0	1	4	10	11	3L	664180	816934	CG3386 CG3371 CG3344 CG32483 CG12015 CG3279 CG13894 CG13895 CG13897 CG1007 CG13900
1810	3	2	0	0	0	0	3	2	4	4	3L	817626	824893	CG13886 CG13901 CG13887 CG13902
1811	5	1	1	0	0	0	4	1	3	3	3L	825250	836205	CG13888 CG13889 CG13890
1812	5	5	0	0	1	1	4	4	2	2	3L	836245	854128	CG12191 CG12502
1813	2	4	0	1	0	0	2	3	6	7	3L	855435	975996	CG32479 CG13907 CG34056 CG13905 CG13906 CG1086 CG13908
1814	3	3	1	0	0	2	2	1	1	1	3L	977520	979243	CG12038
1815	2	1	0	0	1	0	1	1	1	2	3L	979510	1019830	CG18214 CG9205
1816	1	1	0	0	0	0	1	1	1	1	3L	1019901	1084621	CG9097
1817	1	2	0	0	0	0	1	2	4	4	3L	1123981	1182873	CG9102 CG13912 CG9122 CG1200
1818	1	1	0	1	0	0	1	0	1	1	3L	1186838	1188324	CG9119
1819	1	3	1	3	0	0	0	0	2	2	3L	1189597	1191400	CG34022 CG1179
1820	3	3	3	3	0	0	0	0	3	3	3L	1194257	1202228	CG9118 CG1180 CG9116
1821	2	4	2	3	0	1	0	0	2	2	3L	1211300	1215943	CG1165 CG13913
1822	1	1	0	0	1	0	0	1	3	5	3L	1216436	1229471	CG33965 CG33966 CG9194 CG9192 CG9191
1823	1	1	0	0	0	0	1	1	1	1	3L	1230598	1231206	CG9187
1824	2	1	0	1	0	0	2	0	2	2	3L	1231551	1235314	CG9128 CG9129
1825	1	1	1	1	0	0	0	0	1	2	3L	1235544	1239520	CG9130 CG9133
1826	1	3	1	0	0	0	0	3	3	3	3L	1239984	1282029	CG9134 CG32333 CG9139
1827	2	1	0	1	0	0	2	0	4	4	3L	1282216	1290949	CG9148 CG2248 CG9149 CG2277
1828	1	3	1	0	0	0	0	3	2	3	3L	1291085	1301860	CG2469 CG9186 CG9153
1829	2	1	0	1	0	0	2	0	2	2	3L	1305314	1313155	CG9184 CG9155
1830	1	4	1	0	0	0	0	4	3	4	3L	1313338	1318622	CG9160 CG13914 CG2213 CG2211
1831	2	1	0	0	0	0	2	1	1	2	3L	1318623	1325935	CG9165 CG2199
1832	1	1	0	0	0	0	1	1	2	2	3L	1327140	1336385	CG9181 CG9166
1833	4	1	0	0	0	0	4	1	8	8	3L	1354152	1486109	CG1214 CG9169 CG13916 CG1004 CG32319 CG33166 CG12084 CG12085
1834	1	3	0	0	0	2	1	1	4	5	3L	1486745	1520363	CG12086 CG1009 CG12090 CG33971 CG12091
1835	2	1	0	0	1	0	1	1	1	1	3L	1520681	1528358	CG7852
1836	2	3	0	0	0	0	2	3	1	2	3L	1537025	1541842	CG18330 CG12099
1837	2	2	0	0	0	0	2	2	1	3	3L	1541843	1552140	CG7864 CG7879 CG12003
1838	3	3	0	0	0	1	3	2	1	1	3L	1552716	1558268	CG12004
1839	3	3	0	0	1	0	2	3	4	5	3L	1576794	1601634	CG13917 CG12104 CG33791 CG12105 CG13926
1840	2	3	0	0	0	1	2	2	1	2	3L	1601924	1606944	CG7955 CG33230
1841	2	1	0	0	1	0	1	1	2	2	3L	1615213	1622763	CG17248 CG13929
1842	1	1	0	0	0	0	1	1	2	2	3L	1623234	1628624	CG7959 CG7961
1843	1	1	0	0	0	0	1	1	4	6	3L	1629074	1637642	CG13919 CG17249 CG7960 CG13920 CG7967 CG7970
1844	1	5	0	0	0	2	1	3	8	8	3L	1637775	1698426	CG7971 CG7974 CG7977 CG7980 CG13930 CG12011 CG13931 CG7991
1845	5	2	0	0	1	0	4	2	1	1	3L	1699121	1714575	CG2086
1846	1	2	0	0	0	0	1	2	4	5	3L	1714576	1739195	CG2069 CG18173 CG7995 CG13921 CG2054
1847	2	1	0	0	0	0	2	1	1	1	3L	1742704	1755182	CG15804
1848	2	2	0	1	0	0	2	1	1	1	3L	1755341	1758675	CG13933
1849	3	1	2	1	0	0	1	0	1	2	3L	1759165	1760895	CG12018 CG2021
1850	2	1	2	1	0	0	0	0	1	1	3L	1760973	1761879	CG13922
1851	1	1	1	0	0	0	0	1	1	2	3L	1762643	1778851	CG1977 CG32315
1852	1	1	0	0	0	0	1	1	1	2	3L	1778958	1782142	CG12019 CG12020
1853	1	2	0	2	0	0	1	0	3	5	3L	1782341	1806435	CG12021 CG1935 CG12022 CG13923 CG12023
1854	1	2	1	2	0	0	0	0	3	3	3L	1807952	1825612	CG13934 CG13935 CG1919
1855	1	3	1	0	0	0	0	3	3	3	3L	1834880	1845766	CG13936 CG12024 CG1956
1856	2	4	0	0	0	1	2	3	4	4	3L	1846415	1859868	CG1898 CG12025 CG13924 CG1828
1857	3	1	0	0	1	0	2	1	3	3	3L	1860087	1875002	CG13937 CG18315 CG12026
1858	2	1	0	0	0	1	2	0	5	6	3L	1877412	1931493	CG1887 CG13925 CG12361 CG5687 CG1017 CG1960
1859	1	1	0	0	1	0	0	1	2	3	3L	1931494	1946445	CG5690 CG11814 CG5691
1860	1	1	0	0	0	0	1	1	8	10	3L	1948002	2154486	CG1140 CG1927 CG1139 CG1915 CG32307 CG33484 CG32310 CG15822 CG15879 CG5704
1861	1	1	0	0	0	0	1	1	2	2	3L	2156527	2171181	CG15820 CG13810
1862	1	2	0	0	0	0	1	2	7	7	3L	2172690	2232015	CG5707 CG8960 CG15878 CG13809 CG9018 CG5712 CG32301
1863	2	1	0	0	0	0	2	1	2	3	3L	2236294	2246193	CG1275 CG2034 CG32300
1864	2	1	0	0	0	1	2	0	2	2	3L	2246505	2249343	CG13807 CG5714
1865	1	2	0	0	1	2	0	0	10	12	3L	2249926	2360964	CG13806 CG32302 CG5717 CG13804 CG13803 CG13802 CG8985 CG1317 CG8993 CG1320 CG9004 CG15877
1866	1	4	0	0	1	1	0	3	9	12	3L	2373132	2537809	CG32299 CG32298 CG13800 CG32306 CG33231 CG16762 CG16761 CG33232 CG1146 CG16758 CG16757 CG32295
1867	3	6	0	1	0	1	3	4	1	1	3L	2539307	2570072	CG16973
1868	3	1	0	0	0	0	3	1	1	1	3L	2571011	2572529	CG1263
1869	1	2	0	0	0	0	1	2	9	12	3L	2572934	2638987	CG1044 CG16984 CG12182 CG16985 CG16986 CG12002 CG1244 CG14949 CG1143 CG1246 CG12186 CG32297
1870	7	3	0	0	0	0	7	3	8	9	3L	2641013	2757533	CG14950 CG33233 CG33234 CG16976 CG12187 CG32296 CG1240 CG9977 CG12093
1871	2	1	0	0	0	0	2	1	8	9	3L	2764453	2947148	CG2101 CG2103 CG2083 CG9973 CG9972 CG1066 CG32846 CG9965 CG9969
1872	1	1	0	0	0	0	1	1	1	1	3L	2964555	2967083	CG2107
1873	1	6	0	3	0	1	1	2	3	3	3L	2978712	2999601	CG2113 CG2114 CG32488
1874	3	2	0	0	2	2	1	0	1	1	3L	3018730	3024003	CG2162
1875	1	3	0	0	1	0	0	3	1	2	3L	3026133	3030342	CG1274 CG1893
1876	1	3	0	2	0	1	1	0	5	5	3L	3030488	3054371	CG32484 CG32485 CG1271 CG16753 CG32486
1877	3	1	0	0	3	0	0	1	4	4	3L	3054660	3110748	CG11486 CG1869 CG14955 CG7740
1878	1	1	0	0	0	1	1	0	3	3	3L	3112364	3131890	CG11537 CG1291 CG12082
1879	2	1	0	0	2	0	0	1	4	6	3L	3132232	3149248	CG11494 CG14956 CG12079 CG15812 CG11495 CG14962
1880	1	5	0	0	0	0	1	5	1	1	3L	3149249	3152612	CG32280
1881	3	2	0	0	0	0	3	2	2	4	3L	3152819	3161438	CG32278 CG32281 CG14963 CG14964
1882	3	1	0	0	0	0	3	1	2	2	3L	3162466	3176000	CG12734 CG14965
1883	4	1	0	0	0	0	4	1	2	2	3L	3176559	3181052	CG1242 CG14966
1884	1	1	0	0	0	0	1	1	1	9	3L	3181394	3202336	CG32276 CG17569 CG32271 CG33159 CG32277 CG33160 CG32269 CG32270 CG14967
1885	3	2	0	0	1	1	2	1	1	1	3L	3202656	3204451	CG12034
1886	1	1	0	0	0	0	1	1	2	3	3L	3204452	3215852	CG12740 CG17737 CG11505
1887	2	2	0	0	0	0	2	2	4	4	3L	3220474	3259791	CG17746 CG12078 CG14959 CG14960
1888	1	3	0	0	0	0	1	3	3	3	3L	3263779	3285948	CG12017 CG12009 CG14968
1889	7	1	0	0	1	1	6	0	1	3	3L	3303089	3312403	CG12016 CG11526 CG12013
1890	1	3	0	0	1	0	0	3	1	1	3L	3313674	3316474	CG14961
1891	5	2	2	0	2	1	1	1	1	1	3L	3316644	3318510	CG14969
1892	4	2	1	0	1	0	2	2	1	1	3L	3335059	3351668	CG12008
1893	2	1	0	0	1	1	1	0	7	7	3L	3354633	3451591	CG12076 CG12012 CG12014 CG1921 CG10840 CG11513 CG10308
1894	2	1	0	0	2	1	0	0	1	2	3L	3451592	3455645	CG14971 CG32267
1895	1	1	0	0	1	0	0	1	6	6	3L	3469174	3601359	CG14972 CG14973 CG1934 CG10579 CG10359 CG10357
1896	1	1	0	0	0	0	1	1	7	9	3L	3630698	3797499	CG12029 CG10862 CG32264 CG10858 CG32266 CG10855 CG1120 CG32262 CG12006
1897	1	1	0	0	0	0	1	1	5	5	3L	3797717	3880204	CG1065 CG10847 CG1072 CG1079 CG14979
1898	1	2	0	0	0	0	1	2	2	3	3L	3880431	3886452	CG14977 CG14980 CG11624
1899	2	2	0	0	0	0	2	2	2	3	3L	3887043	3893122	CG10849 CG10850 CG14981
1900	2	1	0	0	0	0	2	1	3	3	3L	3893498	3925993	CG15855 CG10866 CG10863
1901	1	1	0	0	0	0	1	1	7	7	3L	3926382	4004711	CG14982 CG10853 CG14984 CG12605 CG1130 CG14985 CG1132
1902	2	2	0	0	1	0	1	2	1	2	3L	4004971	4009541	CG1134 CG11594
1903	3	1	1	0	0	0	2	1	10	12	3L	4012137	4055245	CG32257 CG32256 CG14987 CG32258 CG32255 CG11593 CG1135 CG1136 CG11591 CG18869 CG12028 CG10776
1904	1	4	0	0	0	1	1	3	5	5	3L	4055562	4090653	CG14993 CG14994 CG14989 CG14995 CG14991
1905	2	1	0	0	0	0	2	1	1	1	3L	4091737	4097693	CG14992
1906	9	1	4	0	0	1	5	0	2	2	3L	4097821	4118082	CG14996 CG14998
1907	1	1	0	0	1	1	0	0	1	1	3L	4118385	4119571	CG14999
1908	1	1	0	0	1	0	0	1	6	6	3L	4122610	4150993	CG1167 CG1171 CG32260 CG1299 CG33545 CG15002
1909	1	2	0	1	0	0	1	1	10	17	3L	4153798	4209482	CG1333 CG18675 CG15003 CG15004 CG18676 CG11589 CG1232 CG1308 CG15005 CG1295 CG15006 CG15007 CG15008 CG1259 CG1332 CG32252 CG15009
1910	4	1	1	0	0	0	3	1	1	1	3L	4223841	4226135	CG14997
1911	2	1	0	1	0	0	2	0	1	1	3L	4226268	4229768	CG1258
1912	1	1	1	0	0	0	0	1	1	1	3L	4229858	4235651	CG15010
1913	1	1	0	0	0	0	1	1	5	8	3L	4238306	4266330	CG1265 CG15011 CG1309 CG11586 CG1268 CG1273 CG1311 CG11583
1914	1	2	0	0	0	0	1	2	4	5	3L	4266600	4275921	CG11582 CG1316 CG1276 CG1318 CG15012
1915	1	2	0	0	0	0	1	2	4	5	3L	4276029	4305762	CG1319 CG15013 CG32251 CG32250 CG15014
1916	3	3	0	0	0	0	3	3	1	1	3L	4307066	4346719	CG15015
1917	7	1	3	0	0	1	4	0	2	2	3L	4347154	4349277	CG15016 CG33514
1918	1	1	0	0	1	0	0	1	5	5	3L	4349297	4387768	CG11342 CG18314 CG32240 CG7447 CG7452
1919	2	1	0	0	0	0	2	1	1	1	3L	4387960	4388569	CG15019
1920	2	2	0	0	0	0	2	2	46	53	3L	4389744	4977724	CG11347 CG15020 CG11348 CG15021 CG12607 CG11345 CG15022 CG15023 CG15024 CG32241 CG32248 CG11349 CG7465 CG11350 CG13722 CG13721 CG13720 CG32242 CG32244 CG7525 CG11353 CG11357 CG32245 CG7524 CG7471 CG13717 CG13716 CG13715 CG32234 CG18296 CG32238 CG32236 CG7514 CG18418 CG32239 CG15876 CG13713 CG13712 CG13711 CG7509 CG18808 CG7507 CG7479 CG13708 CG13707 CG32237 CG17150 CG13705 CG13704 CG7499 CG7503 C…
1921	2	1	0	0	1	1	1	0	1	1	3L	5103621	5104187	CG4597
1922	1	1	0	0	1	0	0	1	4	4	3L	5105497	5110180	CG15212 CG15213 CG4603 CG10674
1923	2	1	0	0	0	0	2	1	2	2	3L	5110329	5113301	CG4611 CG10673
1924	2	1	0	0	0	0	2	1	1	4	3L	5113611	5120073	CG4618 CG10672 CG4623 CG10671
1925	1	1	0	0	0	0	1	1	1	2	3L	5120074	5126294	CG4633 CG10670
1926	1	5	0	0	0	1	1	4	1	1	3L	5126516	5128726	CG4659
1927	3	1	0	0	1	0	2	1	1	2	3L	5134622	5251891	CG32423 CG4669
1928	1	4	0	0	0	3	1	1	5	6	3L	5317564	5341955	CG10645 CG10642 CG4769 CG10640 CG4780 CG10635
1929	4	4	1	0	1	2	2	2	1	1	3L	5352733	5356768	CG10633
1930	4	3	1	1	0	1	3	1	2	2	3L	5406954	5413539	CG4814 CG15214
1931	2	2	1	0	0	0	1	2	1	1	3L	5454083	5457610	CG4835
1932	2	1	0	0	0	0	2	1	6	6	3L	5479850	5535544	CG32422 CG10629 CG10626 CG13285 CG10625 CG10624
1933	1	1	0	0	0	0	1	1	4	5	3L	5535636	5564315	CG10622 CG4852 CG4867 CG10596 CG5146
1934	1	1	0	1	0	0	1	0	3	3	3L	5566688	5573636	CG10592 CG5150 CG10591
1935	1	1	1	0	0	0	0	1	1	1	3L	5575029	5577922	CG10590
1936	1	1	0	0	0	0	1	1	1	1	3L	5581106	5582187	CG12756
1937	1	1	0	0	0	0	1	1	4	5	3L	5604930	5721986	CG5249 CG17334 CG10583 CG5406 CG32414
1938	2	1	0	0	0	1	2	0	3	3	3L	5723969	5739653	CG10578 CG5486 CG10576
1939	1	1	0	0	1	0	0	1	1	1	3L	5739794	5741060	CG5495
1940	1	1	0	0	0	1	1	0	1	1	3L	5741083	5742706	CG10575
1941	1	1	0	0	1	0	0	1	2	2	3L	5742949	5751236	CG5505 CG32418
1942	1	2	0	0	0	1	1	1	2	4	3L	5751419	5758632	CG32417 CG33718 CG33717 CG10546
1943	3	1	0	0	0	0	3	1	1	1	3L	5764121	5768138	CG10542
1944	1	1	0	0	0	0	1	1	3	6	3L	5768347	5787030	CG10541 CG10539 CG32416 CG32415 CG5537 CG17498
1945	1	1	0	0	0	0	1	1	1	1	3L	5787637	5819561	CG10491
1946	1	1	0	1	0	0	1	0	3	3	3L	5856354	5871326	CG13287 CG32408 CG10489
1947	1	3	1	0	0	1	0	2	9	10	3L	5871595	5906614	CG5592 CG32409 CG32412 CG32413 CG10486 CG13288 CG10483 CG32407 CG33523 CG10480
1948	4	3	0	0	1	0	3	3	13	14	3L	5906980	6045318	CG33993 CG10479 CG32406 CG6457 CG6462 CG6467 CG6483 CG6580 CG10475 CG6586 CG6592 CG10472 CG6596 CG6600
1949	1	1	0	0	0	0	1	1	1	1	3L	6046091	6047401	CG6602
1950	1	1	0	0	0	1	1	0	1	1	3L	6047436	6049187	CG13295
1951	1	2	0	0	1	1	0	1	25	26	3L	6049506	6147813	CG6610 CG6619 CG13293 CG10469 CG10467 CG10733 CG7018 CG12755 CG18779 CG18778 CG10534 CG10530 CG10529 CG32405 CG32404 CG6955 CG6956 CG18773 CG32400 CG18777 CG7287 CG10297 CG13297 CG12330 CG13296 CG10289
1952	3	1	1	0	1	0	1	1	1	2	3L	6148195	6155730	CG7376 CG10274
1953	1	5	0	3	0	0	1	2	1	1	3L	6156121	6158985	CG10270
1954	4	2	2	2	0	0	2	0	1	1	3L	6159782	6163048	CG10269
1955	2	1	2	0	0	0	0	1	6	6	3L	6163761	6213536	CG7386 CG13298 CG7398 CG10236 CG13299 CG10226
1956	1	1	0	0	0	0	1	1	8	8	3L	6214447	6459003	CG10181 CG10173 CG10163 CG10160 CG32403 CG13300 CG14910 CG14911
1957	1	3	0	0	0	0	1	3	2	2	3L	6460882	6464900	CG10147 CG8270
1958	1	1	0	0	0	0	1	1	1	1	3L	6465174	6469319	CG10144
1959	2	2	0	0	0	0	2	2	1	1	3L	6469677	6523193	CG8339
1960	1	1	0	0	0	0	1	1	4	6	3L	6524686	6592129	CG18769 CG32397 CG10129 CG10125 CG8368 CG8398
1961	1	3	0	0	0	1	1	2	1	1	3L	6597981	6609013	CG8442
1962	3	3	0	0	1	3	2	0	6	6	3L	6638175	6716690	CG10124 CG10121 CG8519 CG10118 CG32394 CG32393
1963	1	1	0	0	1	1	0	0	1	1	3L	6718373	6726233	CG10107
1964	1	1	0	0	1	1	0	0	1	2	3L	6726860	6730466	CG8549 CG10103
1965	1	3	0	0	1	0	0	3	6	6	3L	6730570	6929851	CG32392 CG10037 CG10078 CG14820 CG14821 CG10077
1966	3	1	0	0	0	0	3	1	6	9	3L	6930107	6968391	CG9948 CG10075 CG9943 CG10072 CG10064 CG9953 CG10063 CG10060 CG18647
1967	4	2	0	0	2	2	2	0	7	8	3L	6986173	7067790	CG8647 CG33171 CG17744 CG8641 CG14823 CG8640 CG8638 CG8634
1968	1	2	0	0	1	0	0	2	9	10	3L	7068765	7131020	CG33556 CG8631 CG14825 CG8629 CG15829 CG8628 CG8627 CG8624 CG32390 CG32386
1969	4	2	0	0	1	0	3	2	3	3	3L	7135304	7157849	CG17742 CG32389 CG32387
1970	1	2	0	0	0	2	1	0	2	2	3L	7208731	7211983	CG14826 CG14829
1971	4	2	2	0	2	0	0	2	1	2	3L	7212489	7215296	CG8616 CG8615
1972	2	2	0	0	1	0	1	2	1	2	3L	7215639	7217879	CG8614 CG8612
1973	2	1	0	0	1	0	1	1	3	3	3L	7218335	7224470	CG14827 CG8610 CG8609
1974	3	1	0	0	1	0	2	1	4	5	3L	7224659	7300205	CG14830 CG32381 CG8607 CG8606 CG8605
1975	1	2	0	0	0	1	1	1	2	2	3L	7300220	7307418	CG8602 CG8601
1976	2	1	0	0	1	0	1	1	2	2	3L	7307489	7312935	CG8600 CG8598
1977	1	3	0	0	0	1	1	2	4	6	3L	7313419	7330643	CG8597 CG8596 CG14834 CG4457 CG8593 CG8591
1978	5	1	0	0	1	0	4	1	2	2	3L	7334510	7343164	CG8583 CG8582
1979	1	1	0	0	0	1	1	0	1	1	3L	7343746	7346965	CG8580
1980	1	1	0	0	1	1	0	0	1	1	3L	7347989	7355464	CG32380
1981	1	1	0	0	1	0	0	1	21	22	3L	7355800	7512226	CG8571 CG8564 CG8563 CG32379 CG8562 CG18417 CG8560 CG8556 CG33277 CG33278 CG33279 CG8546 CG16991 CG8543 CG8541 CG8540 CG4321 CG8539 CG7548 CG7546 CG32372 CG8532
1982	1	1	0	0	0	0	1	1	2	2	3L	7515529	7534160	CG32376 CG14837
1983	1	2	0	0	0	1	1	1	4	4	3L	7557454	7614448	CG14838 CG7716 CG33275 CG33276
1984	2	1	0	0	1	0	1	1	1	9	3L	7614740	7700389	CG7506 CG7496 CG7492 CG18768 CG32377 CG7462 CG32375 CG12262 CG7457
1985	3	1	0	0	1	1	2	0	1	4	3L	7702111	7729121	CG8492 CG7422 CG13685 CG7409
1986	1	2	0	0	1	0	0	2	7	7	3L	7734424	7885898	CG7399 CG7391 CG32369 CG17888 CG32365 CG8277 CG8114
1987	2	1	0	0	0	0	2	1	2	2	3L	7886410	7889063	CG8281 CG8111
1988	1	3	0	0	0	0	1	3	4	4	3L	7900539	7946396	CG8110 CG8268 CG8254 CG8194
1989	3	1	0	0	0	0	3	1	3	5	3L	7946397	8024297	CG8042 CG8044 CG8209 CG8038 CG7892
1990	1	2	0	1	0	0	1	1	1	1	3L	8028277	8032658	CG7574
1991	2	3	1	0	0	1	1	2	5	5	3L	8045747	8083995	CG13681 CG7565 CG13680 CG7915 CG7919
1992	2	1	0	0	1	0	1	1	3	3	3L	8084210	8095528	CG7927 CG7558 CG7935
[truncated: 1,103 more rows]

## Sheet: GOO tree & order
(dwil:1049,(((dmel:2,(dere:9,dyak:24)A10:9)A11:237,dana:268)A15:158,dpse:393)A14:178,((dmoj:124,dvir:102)A12:48,dgri:210)A13:570)A16;
dmel	dere	dyak	dana	dpse*	dwil	dvir	dmoj	dgri	A10	A11	A12	A13	A14	A15	A16
A-telo	A-telo	A-telo	A-telo	A-telo	A-telo	A-telo	A-telo	A-telo	A-telo	A-telo	A-telo	A-telo	A-telo	A-telo	A-telo
1	1	1	224	609	608	-58	-58	-298	1	1	-58	-58	512	291	512
2	2	2	225	610	609	-57	-57	-297	2	2	-57	-57	-513	292	-513
3	3	3	227	267	611	-56	-56	296	3	3	-56	-56	514	301	514
4	4	4	228	268	357	-55	-55	-295	4	4	-55	-55	-21	302	-21
5	5	5	229	269	-485	-54	-54	104	5	5	-54	-54	-20	303	-20
6	6	6	230	-506	-484	-53	-53	-105	6	6	-53	-53	1	304	1
7	7	7	231	-505	-275	52	52	425	7	7	52	52	2	305	2
8	8	8	232	-518	502	-126	-126	426	8	8	-126	-126	3	306	3
9	9	9	233	139	-503	-125	-125	-427	9	9	-125	-125	4	307	4
10	10	10	234	-212	504	-124	-124	292	10	10	-124	-124	-204	-115	-204
11	11	11	235	-211	505	-123	-123	-604	11	11	-123	-123	-203	-114	-203
12	12	12	477	159	-261	-615	-122	-603	12	12	-122	-122	-202	-113	-202
13	13	13	-511	160	263	-614	121	-602	13	13	121	121	-201	-112	-201
14	14	14	-510	161	-34	-613	359	-601	14	14	359	359	195	-111	195
15	15	15	209	162	35	509	360	600	15	15	360	360	-200	-110	-200
16	16	16	210	-464	36	345	-20	-599	16	16	-20	-20	469	-109	469
17	17	17	211	-463	167	-574	343	-598	17	17	343	343	-64	-108	-64
18	18	18	-516	-462	-98	186	344	595	18	18	344	344	-63	-107	-63
19	19	19	-515	-166	342	464	-94	596	19	19	510	510	-88	-106	-88
20	20	20	226	-165	343	6	-140	597	20	20	594	594	-87	-105	-87
21	21	21	22	-164	270	7	-466	-324	21	21	-518	-518	-86	104	-86
22	22	22	123	163	271	8	-465	-528	22	22	10	10	-85	-103	-85
23	23	23	124	465	272	9	36	-527	23	23	11	11	-84	-102	-84
24	24	24	125	466	273	-254	561	555	24	24	-139	-139	-83	-101	-83
25	25	25	244	467	-420	-412	-562	283	25	25	183	183	-82	-100	-82
26	26	26	245	468	-193	244	563	284	26	26	184	184	-81	-99	-81
27	27	27	246	-402	-192	-571	564	548	27	27	185	185	-80	168	-80
28	28	28	-163	-401	92	-570	565	311	28	28	-573	-573	-73	266	-73
29	29	29	-162	-492	-24	-569	566	-618	29	29	-572	-572	-72	611	-72
30	30	30	-161	-491	221	-580	567	-617	30	30	-369	-369	-71	357	-71
31	31	31	-160	301	527	-579	-84	81	31	31	-368	-368	-70	-290	-70
32	32	32	-159	302	-528	-578	-83	21	32	32	-367	-367	37	-289	37
33	33	33	23	303	529	-577	581	-137	33	33	-366	-366	38	-288	38
34	34	34	59	304	-460	-576	582	-188	34	34	-187	-187	39	-287	39
35	35	35	60	305	-459	-575	583	-415	35	35	148	148	40	-286	40
36	36	36	61	306	-458	-461	415	-583	36	36	-33	-33	41	-285	41
37	37	37	62	307	-455	481	188	-582	37	37	44	44	42	-284	42
38	38	38	-79	-115	-454	478	137	-581	38	38	45	45	43	-283	43
39	39	39	-78	-114	575	479	-21	83	39	39	-242	-242	44	-282	-32
40	40	40	172	-113	576	-122	-79	84	40	40	-241	-241	45	-281	-31
41	41	41	173	-112	451	121	-80	543	41	41	-240	-240	46	-280	-30
42	42	42	174	483	452	359	-341	544	42	42	-239	-239	47	279	-29
43	43	43	175	308	453	360	-340	-435	43	43	-238	-238	48	-278	-28
44	44	44	446	-367	93	-20	-339	434	44	44	-237	-237	49	-358	-27
45	45	45	447	-366	166	343	377	-433	45	45	-236	-236	50	-120	-26
46	46	46	448	-365	-161	344	378	-432	46	46	-235	-235	51	-119	-25
47	47	47	449	364	461	510	442	-431	47	47	-234	-234	52	-118	-24
48	48	48	450	377	-462	594	-133	-430	48	48	-149	-149	617	-117	221
49	49	49	451	-147	-323	-518	-132	-67	49	49	-517	394	618	-116	-16
50	50	50	-452	-146	-604	10	-131	-66	50	50	-516	395	619	324	-15
51	51	51	453	145	435	11	-130	500	51	51	245	-90	620	-597	-22
52	52	52	454	-144	-603	-139	-129	-476	52	52	127	-89	621	-596	-214
53	53	53	455	-92	-602	183	-128	-475	53	53	449	413	-460	-595	-213
54	54	54	-243	255	-601	184	-171	-61	54	54	-448	414	-459	598	252
55	55	55	-242	297	-600	185	-392	-60	55	55	-447	512	-458	599	253
56	56	56	-241	298	-599	-573	-391	-59	56	56	-446	-513	-457	600	254
57	57	57	240	593	-100	-572	-390	-23	57	57	-175	514	-456	601	-9
58	58	58	-239	594	-99	-369	-389	159	58	58	-409	-521	-411	602	-8
59	59	59	-238	325	551	-368	-388	-22	59	59	-393	-520	-410	603	-7
60	60	60	-237	326	552	-367	-387	542	60	60	-70	-519	216	604	-6
61	61	61	-236	327	560	-366	-386	-567	61	61	-94	223	408	605	-464
62	62	62	478	-445	559	-187	-385	-566	62	62	-140	224	409	606	-463
63	63	63	479	192	-558	148	-182	-565	63	63	-466	225	-292	607	-462
64	64	-380	480	193	23	-33	406	-564	64	64	-465	226	-291	608	161
65	65	-379	-481	194	59	44	407	-563	65	65	36	1	-511	609	-166
66	66	181	188	196	-60	45	180	562	66	66	561	2	-510	610	-250
67	67	182	189	486	61	-242	181	-561	67	67	-562	3	-509	267	-249
68	68	183	190	487	522	-241	-405	-36	68	68	563	4	613	268	-248
69	69	184	-48	-37	414	-240	-404	465	69	69	564	-204	614	269	-247
70	70	185	-47	488	368	-239	-403	466	70	70	565	-203	615	-485	488
71	71	186	-46	-490	369	-238	-199	140	71	71	566	-202	616	-484	-490
72	72	187	-45	-489	189	-237	-198	94	72	72	567	-201	-300	-275	-489
73	73	188	-44	-59	-497	-236	-468	70	73	73	-84	195	-299	-274	496
74	74	189	-43	-23	-542	-235	-467	393	74	74	-83	-200	295	493	497
75	75	190	-42	-210	-212	-234	516	-142	75	75	581	-469	296	494	310
76	76	191	-41	-209	-159	-149	517	397	76	76	582	-64	297	495	419
77	77	192	-40	-208	-498	-517	149	398	77	77	583	-63	298	491	420
78	78	193	-39	-207	-468	-516	234	-450	78	78	415	-88	285	492	-273
79	79	194	-621	206	232	245	235	179	79	79	188	-87	286	350	-272
80	80	195	-620	-205	328	127	236	93	80	80	137	-86	553	351	-271
81	81	196	-619	-95	-330	449	237	-125	81	81	-21	-85	554	352	-270
82	82	197	-618	18	-329	-448	238	-124	82	82	-81	568	555	353	347
83	83	198	-617	19	331	-447	-240	-123	83	83	-511	-82	556	354	348
84	84	199	-52	-220	333	-446	-239	-122	84	84	-593	411	557	355	349
85	85	200	-51	-121	334	-175	241	121	85	85	592	456	558	356	-421
86	86	201	-50	359	335	-409	242	359	86	86	-591	457	-559	612	-322
87	87	202	-166	-361	443	-393	-45	360	87	87	-590	-134	-560	-508	-321
88	88	203	-165	-360	444	-70	-44	-20	88	88	-589	34	-552	-507	-320
89	89	204	-164	-526	445	-94	33	343	89	89	-480	35	-551	-506	-319
90	90	205	247	96	176	-140	-148	344	90	90	-479	-163	-550	-505	-318
91	91	206	248	97	177	-466	187	510	91	91	-478	164	-549	-504	-317
92	92	207	249	-363	178	-465	366	594	92	92	-481	165	-548	503	-316
93	93	208	250	-362	198	36	367	-518	93	93	461	-92	-284	-502	-315
94	94	209	251	-254	594	561	368	-185	94	94	575	192	-283	-501	-314
95	95	210	252	-253	-185	-562	369	-184	95	95	576	193	-282	-500	-313
96	96	211	253	-252	593	563	572	138	96	96	577	194	-281	-499	-312
97	97	212	254	-336	543	564	573	-251	97	97	578	196	-280	-498	-311
98	98	213	362	-335	544	565	-185	-524	98	98	579	197	279	-309	-418
99	99	-172	363	-90	441	566	-184	-523	99	99	580	135	-278	-308	223
100	100	-171	257	-89	-279	567	-183	-522	100	100	569	306	-358	-296	224
101	101	-170	258	413	-278	-84	139	-454	101	101	570	-504	-504	-295	225
102	102	-169	259	414	-467	-83	-11	-453	102	102	571	503	503	-294	226
103	103	-168	-262	415	-466	581	-10	-452	103	103	-244	-502	-502	-293	227
104	104	-167	-261	416	88	582	518	53	104	104	412	-501	-501	-300	228
105	105	-166	-260	417	-20	583	-594	54	105	105	254	-429	-500	-299	229
106	106	-165	263	-444	-152	415	-510	55	106	106	-9	-428	-499	-298	-230
107	107	-164	-219	-443	-336	188	167	56	107	107	-8	-291	-498	-297	231
108	108	-163	220	-442	396	137	-98	211	108	108	-7	277	-309	-323	232
109	109	-162	-19	-378	397	-21	342	212	109	109	-6	-379	-308	-277	233
110	110	-161	404	479	-209	-81	-402	-384	110	110	-464	471	-323	-276	234
111	111	-160	405	480	-208	-511	-401	383	111	111	-186	472	-277	-483	235
112	112	-159	406	-481	568	-593	-400	-382	112	112	574	473	-276	486	236
113	113	-158	407	461	97	592	-399	381	113	113	-345	-474	350	487	237
114	114	-157	152	575	-110	-591	-398	-380	114	114	-509	-459	351	488	238
115	115	-156	153	345	111	-590	-397	451	115	115	613	257	352	-490	239
116	116	-155	154	-574	325	-589	-396	243	116	116	614	258	353	-489	240
117	117	-154	155	-573	326	-480	77	-455	117	117	615	259	354	496	241
118	118	-153	156	-572	327	150	153	-585	118	118	150	260	355	497	242
119	119	-152	157	-571	-129	151	154	-584	119	119	151	261	356	310	243
120	120	-151	158	-570	-128	217	155	416	120	120	217	262	612	419	-455
121	121	-150	-17	-569	-126	218	156	417	121	121	218	263	-508	420	-454
122	122	-149	222	561	-125	-219	157	52	122	122	-219	264	-507	-273	-453
123	123	-148	223	-562	-47	220	158	-126	123	123	220	362	-506	272	-452
124	124	-147	-616	563	-46	-19	-17	-494	124	124	-19	363	-505	-271	-451
125	125	-146	-615	564	-45	-18	222	-493	125	125	-18	-97	-518	-270	380
126	126	-145	-614	565	44	-215	136	274	126	126	-215	-96	-139	347	381
127	127	-144	-192	566	286	167	62	-483	127	127	167	549	-212	348	382
128	128	-143	-191	28	-116	-98	-81	279	128	128	-98	550	-211	349	383
129	129	-142	-53	30	-283	342	-511	-278	129	129	342	-300	-210	421	384
130	130	-141	-54	31	-282	198	-593	-545	130	130	198	334	-209	422	385
131	131	-140	49	32	-281	199	592	541	131	131	199	335	-208	423	386
132	132	-139	167	33	-280	403	-591	-75	132	132	403	336	-207	424	387
133	133	-138	-98	34	-155	404	-590	74	133	133	404	-14	206	425	388
134	134	-137	-97	35	-53	405	-589	-208	134	134	405	-13	-205	426	389
135	135	-136	387	36	-52	-181	-480	-207	135	135	-181	-12	526	427	390
136	136	-135	388	38	-477	-180	-479	-65	136	136	-180	167	-361	428	391
137	137	-134	389	39	-83	-407	-478	209	137	137	-407	-98	-360	429	392
138	138	-133	390	40	-82	-406	-481	210	138	138	-406	342	-359	430	105
139	139	-132	391	41	-81	182	575	57	139	139	182	198	121	431	106
140	140	-131	392	42	-80	385	576	58	140	140	385	199	122	432	107
141	141	-130	393	43	524	386	577	-250	141	141	386	403	123	433	108
142	142	-129	394	44	415	387	578	-249	142	142	387	404	124	434	109
143	143	-128	395	45	416	388	579	-586	143	143	388	405	125	435	110
144	144	-127	396	46	534	389	580	467	144	144	389	-181	126	-544	111
145	145	-126	397	47	465	390	569	468	145	145	390	-180	127	-543	555
146	146	-125	398	48	-10	391	570	-402	146	146	391	-407	128	-542	-499
147	147	-124	399	-49	482	392	571	-401	147	147	392	-406	129	-541	-498
148	148	-123	400	50	-346	-616	-244	-400	148	148	171	182	130	545	-309
149	149	-122	401	51	109	-233	412	-399	149	149	128	385	131	546	-308
150	150	-121	402	52	-363	147	254	-183	150	150	129	386	132	547	-115
151	151	-120	-412	53	-362	-170	-9	139	151	151	130	387	189	548	-114
152	152	-119	-411	54	579	-169	-8	-11	152	152	131	388	190	549	-113
153	153	-118	-410	55	580	-265	-7	-10	153	153	132	389	191	550	-112
154	154	-117	216	56	581	-525	23	-573	154	154	133	390	-91	551	483
155	155	-116	408	57	199	91	59	-572	155	155	-442	391	525	552	-269
156	156	-115	409	58	403	-372	60	-369	156	156	-378	392	265	560	-268
157	157	-114	-215	152	404	68	61	-368	157	157	-377	171	169	559	-267
158	158	-113	-214	153	405	69	475	72	158	158	339	128	170	-558	-610
159	159	-112	-213	154	-181	-174	476	73	159	159	340	129	171	-557	-609
160	160	-111	-212	155	-180	-173	-500	141	160	160	341	130	-77	-556	-608
161	161	-110	517	-340	-179	255	556	-396	161	161	79	131	396	-555	-607
162	162	-109	140	-339	-134	256	557	77	162	162	-62	132	397	-554	-606
163	163	-108	141	-338	-133	376	558	-346	163	163	-136	133	398	-553	-605
164	164	-107	142	133	-132	-375	-559	76	164	164	-222	-442	399	436	-357
165	165	-106	143	134	-131	-374	-560	-80	165	165	17	-378	400	437	-611
166	166	-105	202	198	-332	-445	-552	-172	166	166	-158	-377	401	438	-266
167	167	-104	203	-394	-130	-444	-551	78	167	167	-157	339	402	439	-168
168	168	-103	204	-393	127	-443	106	-371	168	168	-156	340	-468	440	99
169	169	-102	205	-392	555	206	107	-370	169	169	-155	341	-467	441	100
170	170	-101	-206	-391	-495	-205	108	-515	170	170	-154	79	-466	561	101
171	171	-100	207	-388	-494	526	109	-477	171	171	-153	-62	-465	-562	102
172	172	-99	334	390	-202	-361	110	-482	172	172	-152	-136	36	563	103
173	173	-98	335	-389	136	-410	111	-178	173	173	373	-222	-69	564	-104
174	174	-97	336	-387	-184	216	-322	-177	174	174	176	17	-68	565	393
175	175	-96	-369	-386	-183	408	536	-176	175	175	177	-158	-67	566	394
176	176	-95	-368	-385	-182	394	537	-373	176	176	178	-157	-66	567	395
177	177	-94	-367	-384	203	395	538	152	177	177	482	-156	-65	568	-90
178	178	-93	35	-383	251	-90	-539	153	178	178	477	-155	-470	569	-89
179	179	-92	5	-382	-138	-89	540	154	179	179	515	-154	133	570	413
180	180	-91	6	-381	-523	413	-429	155	180	180	370	-153	134	571	414
181	-378	-90	7	-380	-519	414	-243	156	-378	181	371	-152	198	572	-58
182	-377	-89	8	-73	-563	512	-451	157	-377	182	-78	373	199	573	-57
183	-376	-88	9	-72	562	-513	380	158	-376	183	172	176	403	574	-56
184	-375	-87	10	-71	-561	514	-381	-17	-375	184	-417	177	404	461	-55
185	-374	-86	11	-70	374	-521	382	222	-374	185	-416	178	405	575	-54
186	-373	-85	76	247	-373	-520	383	-244	-373	186	584	482	-181	576	-53
187	-372	-84	77	248	-372	-519	384	412	-372	187	585	477	-180	577	52
188	-371	-83	-171	249	-257	152	-212	254	-371	188	455	515	-179	578	-126
189	-370	-82	-170	250	408	153	-211	-9	-370	189	-243	370	-178	579	-125
190	-369	-81	-169	369	409	154	-210	8	-369	190	-451	371	-177	580	-124
191	-368	-80	-476	370	-118	155	-209	-7	-368	191	380	-78	-176	581	-123
192	-367	-79	-475	371	489	455	65	-6	-367	192	-381	172	-445	582	-122
193	-366	-78	-132	-78	490	-243	207	588	-366	193	382	-417	-444	583	-121
194	-365	-77	-131	172	-276	-451	208	-16	-365	194	383	-416	-443	584	359
195	-364	-76	-130	173	-488	380	-74	-310	-364	195	384	584	-442	585	360
196	-363	-75	-129	174	-487	-381	75	-497	-363	196	-212	585	-378	586	361
197	-362	-74	-128	175	156	382	-250	-496	-362	197	-211	455	-377	587	-526
198	-361	-73	-127	446	55	383	-249	-495	-361	198	-210	-243	-364	588	205
199	-360	-72	-134	447	545	384	-586	409	-360	199	-209	-451	365	589	-206
200	-359	-71	-133	448	154	-212	615	175	-359	200	65	380	366	590	207
201	-358	-70	512	-449	54	-211	150	446	-358	201	207	-381	367	591	208
202	-357	-69	-513	450	-442	-210	151	447	-357	202	208	382	368	592	209
203	-356	-68	514	-511	-378	-209	217	448	-356	203	-74	383	369	593	210
204	-355	-67	-68	-510	-377	65	218	449	-355	204	75	384	370	594	211
205	-354	-66	-67	-509	-135	207	-219	-127	-354	205	-250	-212	371	325	212
206	-353	-65	-66	613	-197	208	220	-245	-353	206	-249	-211	-78	326	139
207	-352	-64	-65	614	-196	-74	-19	136	-352	207	-586	-210	172	327	518
208	-351	381	470	615	-194	75	-18	62	-351	208	467	-209	173	328	505
209	-350	382	-366	616	419	-250	-215	-79	-350	209	468	65	174	329	506
210	-349	383	-365	618	-541	-249	70	-341	-349	210	-402	207	175	330	507
211	-348	384	364	619	348	-586	393	-340	-348	211	-401	208	446	331	508
212	-347	385	377	620	349	467	409	-339	-347	212	-400	-74	447	332	-612
213	-346	386	378	621	-421	468	175	377	-346	213	-399	75	448	333	-356
214	-345	387	442	-460	139	-402	446	378	-345	214	-398	-541	-449	334	-355
215	-344	388	443	-459	518	-401	447	442	-344	215	-397	545	450	335	-354
216	-343	389	-594	-458	-14	-400	448	-133	-343	216	-396	278	451	336	-353
217	-342	390	373	-457	-13	-399	-449	-132	-342	217	77	-279	452	337	-352
218	-341	391	374	-456	-12	-398	-127	615	-341	218	-346	535	453	338	-351
219	-340	392	375	-411	-473	-397	-245	150	-340	219	76	486	454	339	-350
220	-339	393	-376	-410	407	-396	-614	151	-339	220	-80	487	455	340	-117
221	-338	394	-256	216	-389	77	-613	217	-338	221	-93	-424	-243	341	-116
222	-337	395	-255	408	-388	-346	509	110	-337	222	-179	-423	-242	342	324
223	-336	396	-417	409	-387	76	345	111	-336	223	450	-303	-241	343	-597
224	-335	397	-416	617	-386	-80	-574	-2	-335	224	92	-302	-240	344	-596
225	-334	398	-415	-215	-385	-93	186	-1	-334	225	-165	-301	-239	345	-595
226	-333	399	-414	20	-384	-179	464	-226	-333	226	-164	491	-238	346	598
227	-332	400	-413	21	-383	450	6	-225	-332	227	163	492	-237	-482	599
228	-331	401	-385	-3	-382	92	159	-224	-331	228	-35	-485	-236	-187	600
229	-330	402	-384	-2	-381	-164	-22	-223	-330	229	-34	-484	-235	-186	601
230	-329	403	-383	-1	-380	163	542	88	-329	230	134	-275	-234	-185	602
231	-328	404	-382	4	577	-35	543	63	-328	231	-457	-274	-233	-184	603
232	-327	405	-381	-204	225	-34	544	64	-327	232	-456	493	-232	-183	604
233	-326	406	-380	-203	226	134	-435	469	-326	233	-411	494	-231	-182	-441
234	-325	407	-379	-202	227	-457	434	200	-325	234	82	495	-230	-181	-440
235	-324	408	471	-201	-228	-456	-433	-195	-324	235	-568	496	-229	-180	-439
236	-323	409	472	195	229	-411	-432	201	-323	236	85	497	-228	-179	-438
237	-322	410	473	-200	-230	82	-431	202	-322	237	86	310	-227	-178	-437
238	-321	411	-474	469	231	-568	-430	203	-321	238	87	16	-226	-177	-436
239	-320	412	-265	-64	-277	85	-67	204	-320	239	88	-588	-225	-176	287
240	-319	413	-525	-63	309	86	-66	-4	-319	240	63	-587	-224	-445	288
241	-318	414	-524	-88	140	87	459	-3	-318	241	64	-248	-223	-444	289
242	-317	415	-523	-87	-338	88	474	553	-317	242	469	-247	-222	-443	290
243	-316	416	-522	-86	-337	63	-473	546	-316	243	200	-24	17	-442	422
244	-315	417	-521	-85	-65	64	-472	547	-315	244	-195	221	-158	-378	423
245	-314	418	-520	-84	-74	469	-471	-294	-314	245	201	337	-157	-377	424
246	-313	419	-519	-83	220	200	379	-120	-313	246	202	338	-156	-364	425
247	-312	420	-518	-82	-19	-195	-277	-119	-312	247	203	-364	-155	365	426
248	-311	421	-139	-81	-18	201	291	-118	-311	248	204	365	-154	366	-427
249	-310	422	-138	-80	-215	202	428	276	-310	249	-4	5	-153	367	428
250	-309	423	-137	138	-16	203	450	269	-309	250	-3	-162	-152	368	429
251	-308	424	-136	213	-15	204	92	-15	-308	251	-2	-160	-58	369	430
252	-307	425	-135	214	-22	-4	-165	160	-307	252	-214	15	-57	370	431
253	-306	426	-197	567	-21	-3	-164	162	-306	253	-213	419	-56	371	432
254	-305	427	-196	568	406	-2	163	-5	-305	254	252	420	-55	372	433
255	-304	428	-194	-128	-472	-214	-35	-365	-304	255	253	-273	-54	373	434
256	-303	429	-193	238	469	-213	-34	364	-303	256	-616	271	-53	374	435
257	-302	430	613	239	-64	252	134	464	-302	257	-233	272	34	375	-544
258	-301	431	509	240	-63	253	-457	-587	-301	258	147	-270	35	-376	-543
259	-300	432	-208	241	-618	171	-456	-248	-300	259	-170	347	-163	-256	-542
260	-299	433	-333	242	-617	128	-411	-247	-299	260	-169	348	164	-255	-470
261	-298	434	-332	243	619	129	82	12	-298	261	-265	349	165	-417	189
262	-297	435	-331	-455	448	130	-568	13	-297	262	-525	-421	166	-416	190
263	-296	436	-330	-454	449	131	85	220	-296	263	91	-322	462	-415	191
264	-295	437	-329	-453	450	132	86	-19	-295	264	-372	536	463	-414	-91
265	-294	438	-328	-452	-511	133	87	-18	-294	265	68	537	464	-413	525
266	-293	439	-327	-451	-510	-442	88	521	-293	266	69	538	-162	-412	265
267	-292	440	-326	512	-509	-378	63	-514	-292	267	-174	-539	-161	-411	169
268	-291	441	-325	-513	-613	-377	64	513	-291	268	-173	540	-160	-410	170
269	-290	442	444	514	-285	339	469	-379	-290	269	255	-323	-159	216	171
270	-289	443	445	515	-423	340	200	471	-289	270	256	-517	23	408	-77
271	-288	444	176	516	395	341	-195	472	-288	271	376	-516	59	409	396
272	-287	445	177	517	-90	79	201	473	-287	272	-375	-571	60	-215	397
273	-286	446	178	140	211	-62	202	-474	-286	273	-374	-570	61	-214	398
274	-285	447	179	141	-210	-136	203	-459	-285	274	-445	-569	62	-213	399
275	-284	448	121	142	-582	331	204	-252	-284	275	-444	38	-79	-212	400
276	-283	449	122	124	-223	73	-4	213	-283	276	-443	39	-341	-211	401
277	-282	450	15	125	224	141	-3	214	-282	277	206	40	-340	-210	402
278	-281	451	16	126	-249	142	-2	-470	-281	278	-205	41	-339	-209	-468
279	-280	452	-221	127	-248	452	-214	189	-280	279	526	42	-338	-208	-467
280	-279	453	24	-237	-515	453	-213	190	-279	280	-361	43	-337	-207	-466
281	-278	454	25	-236	222	454	252	191	-278	281	-410	-32	-94	206	-465
282	-277	455	26	-235	174	522	253	-186	-277	282	216	-31	-93	-205	36
283	-276	456	27	-234	66	523	179	574	-276	283	408	-30	-92	-204	-69
284	-275	457	28	-233	-101	524	93	-345	-275	284	394	-29	192	-203	-68
285	-274	458	29	-232	-598	251	-76	-509	-274	285	395	-28	193	-202	-67
286	-273	459	30	-231	-345	-138	346	613	-273	286	-90	-27	194	-201	-66
287	-272	460	31	-230	354	192	-152	614	-272	287	-89	-26	196	195	-65
288	-271	461	32	-229	355	193	373	-131	-271	288	413	-25	197	-200	-74
289	-270	462	33	-228	356	194	176	-130	-270	289	414	529	135	-199	75
290	-269	463	-34	-227	37	196	177	-129	-269	290	512	530	136	-198	553
291	-268	464	55	-226	-39	197	178	-128	-268	291	-513	531	137	-134	554
292	475	465	56	-225	-38	135	482	-171	-267	292	514	532	-379	-133	486
293	476	466	57	-224	-42	325	477	-392	-266	293	-521	533	471	-477	487
294	477	467	58	-223	40	-326	515	-391	-265	294	-520	534	472	478	187
295	478	468	-38	-222	41	327	370	-390	-264	295	-519	280	473	479	366
296	479	469	-37	17	43	328	371	-389	-263	296	223	281	-474	480	367
297	480	470	-36	-158	-32	329	-78	-388	-262	297	224	282	-476	-481	368
298	481	471	-4	-157	-31	-330	172	-387	-261	298	225	-499	-475	188	369
299	482	472	-3	-156	-30	-222	-417	-386	-260	299	226	-498	-188	189	370
300	483	473	-2	-274	-29	17	-416	-385	-259	300	1	-437	346	190	371
301	484	474	-1	294	425	-158	584	-182	-258	301	-470	-436	482	191	-78
302	485	475	20	-547	426	-157	585	406	-257	302	189	-290	-187	192	172
303	486	476	21	-546	-554	-156	455	407	-256	303	190	-289	-186	193	173
304	487	477	69	-545	-553	-585	-303	180	-255	304	191	-288	-185	194	174
305	488	478	70	541	175	-584	-302	181	-254	305	12	-287	-184	196	175
306	489	479	71	542	446	416	-301	-405	-253	306	13	299	-183	197	446
307	490	480	72	543	585	417	491	-549	-252	307	14	-333	-182	135	447
308	491	481	73	-186	586	-172	492	96	-251	308	-336	-332	406	136	448
309	492	482	80	-185	587	78	-485	97	-250	309	-335	-331	407	137	-449
310	493	483	81	-184	588	-371	-484	-363	-249	310	71	330	-250	138	450
311	494	484	82	-183	85	-370	-275	-362	-248	311	72	-329	-249	139	138
312	495	-362	83	-182	86	-515	276	-264	-247	312	73	-328	-248	518	-251
313	496	-361	84	406	-68	-477	-173	-263	-246	313	141	-327	-247	519	-524
314	497	-360	-85	407	-67	-482	255	-262	-245	314	142	-326	488	520	-523
315	498	-359	86	-368	94	-178	256	-261	-244	315	452	-325	-490	521	-522
316	499	-358	87	309	-95	-177	376	-260	-243	316	453	505	-489	522	-521
317	500	-357	88	498	-247	-176	-375	-259	-242	317	454	506	496	523	-520
318	501	-356	89	-604	48	-373	-374	-258	-241	318	522	507	497	524	-519
319	502	-355	90	-603	49	223	-445	-257	-240	319	523	-408	310	525	549
320	503	-354	91	-602	-371	224	-444	253	-239	320	524	-216	419	265	550
321	504	-353	92	-601	266	225	-443	-616	-238	321	251	410	420	169	551
322	505	-352	93	-600	610	226	206	-233	-237	322	-138	361	-273	170	552
323	506	-351	94	-599	267	1	-205	147	-236	323	192	-526	272	171	560
324	507	-350	-14	-598	268	-470	526	-170	-235	324	193	205	-271	-77	559
325	508	-349	-13	595	-358	189	330	526	-234	325	194	-206	-270	-76	-558
326	509	-348	-12	596	360	190	-329	-143	-233	326	196	443	347	-75	-557
327	510	-347	-75	597	361	191	-328	46	-232	327	197	444	348	74	-556
328	511	-346	74	-324	-526	12	-327	47	-231	328	135	445	349	63	500
329	512	-345	63	116	205	13	326	48	-230	329	325	374	421	64	501
330	513	-344	64	117	-206	14	-325	49	-229	330	-326	375	422	-469	502
331	514	-343	-469	118	-359	-336	-135	281	-228	331	327	-376	423	403	-503
332	515	-342	403	119	121	-335	-197	-490	-227	332	328	-256	424	404	504
333	516	-341	-18	120	476	71	-196	-489	-226	333	329	-255	425	405	358
334	517	-340	95	-439	17	72	-194	460	-225	334	-330	173	426	406	546
335	518	-589	96	-438	-158	332	-193	-621	-224	335	331	174	-427	407	547
336	519	-588	-386	-437	-457	333	-192	-335	-223	336	332	-69	428	152	-294
337	520	-587	-468	553	-456	-299	138	429	-222	337	333	-68	429	153	-293
338	521	-586	-467	554	-616	287	-251	501	-221	338	-299	372	430	154	-33
339	522	-585	-466	555	-615	288	-524	502	-220	339	287	-91	431	155	44
340	523	-584	-465	556	390	289	-523	-503	-219	340	288	525	432	156	45
341	524	-583	-464	557	391	290	-522	504	-218	341	289	265	433	157	46
342	525	-582	-463	558	-564	436	-454	-306	-217	342	290	169	434	158	47
343	526	-581	-462	-559	370	437	-453	-135	-216	343	436	170	435	-17	48
344	527	-580	-460	-560	-168	498	-452	-197	-215	344	437	-147	-544	222	49
345	528	-579	-459	-552	595	499	-142	-196	-214	345	498	233	-543	223	50
346	529	-578	-458	-551	-597	-282	-141	-194	-213	346	499	616	-542	224	51
347	530	-577	-457	-550	596	-281	-73	-193	-212	347	-282	-253	-541	225	34
348	531	-576	456	-549	-324	-280	-72	-192	-211	348	-281	-252	545	226	35
349	532	-575	126	-548	-486	-534	-71	92	-210	349	-280	213	546	227	-163
350	533	-574	198	-284	-565	-533	335	-165	-209	350	-534	214	547	228	164
351	534	-573	199	-283	392	-532	336	-164	-208	351	-533	-470	-294	229	165
352	535	-572	200	-282	105	-531	-14	163	-207	352	-532	189	-293	230	-92
353	536	-571	-195	-281	106	-530	-13	-35	-206	353	-531	190	-33	231	192
354	537	-570	201	-280	-107	-529	441	-34	-205	354	-530	191	-32	232	193
355	538	-569	144	-279	108	25	-460	-488	-204	355	-529	215	-31	233	194
356	539	-568	-145	-278	496	26	489	418	-203	356	25	18	-30	234	196
357	540	-567	146	-277	-310	27	490	-293	-202	357	26	19	-29	235	197
358	541	-566	147	-276	-298	28	-488	508	-201	358	27	-220	-28	236	135
359	542	-565	148	485	-297	29	617	-612	-200	359	28	219	-27	237	136
360	543	-564	149	143	-246	30	618	116	-199	360	29	-218	-26	238	137
361	544	-563	150	93	-501	-31	-311	569	-198	361	30	-217	-25	239	323
362	545	-562	151	94	-307	32	-548	570	-197	362	31	-151	-24	240	-540
363	546	-561	217	337	-306	-43	-284	571	-196	363	32	-150	221	241	-539
364	547	-560	218	584	-305	-42	-283	285	-195	364	-43	-615	-16	242	-538
365	548	-559	264	585	-304	-41	-555	286	-194	365	-42	-614	-15	243	-537
366	549	-558	526	586	-303	47	527	-103	-193	366	-41	-613	-22	-455	-536
367	550	-557	-361	587	-492	48	528	-115	-192	367	-40	509	527	-454	-535
368	551	-556	-360	588	-319	49	324	356	-191	368	-39	345	528	-453	-534
369	552	-555	-359	589	-318	116	-597	-438	-190	369	-38	-574	529	-452	-533
370	553	-554	180	590	-317	117	-596	-309	-189	370	-37	186	530	-451	-532
371	554	-553	181	591	-316	350	-595	-308	-188	371	-463	464	531	-450	-531
372	555	-552	182	592	-315	351	598	-358	-187	372	-462	6	532	-449	-530
373	556	-297	183	285	-314	352	599	-357	-186	373	161	7	533	-448	-529
374	557	-296	184	286	-313	353	-600	-611	-185	374	-166	8	534	-447	-528
375	558	-295	185	-436	-312	354	601	-266	-184	375	-51	9	535	-446	-527
376	559	-294	186	287	-235	355	602	-168	-183	376	-50	-254	536	-175	215
377	560	-293	187	288	234	356	603	-25	-182	377	-95	-412	537	-174	18
378	561	-292	482	289	-233	612	604	529	-181	378	-458	244	538	-173	19
379	562	-291	-346	290	200	-508	-292	530	379	379	227	245	539	-172	-220
380	563	-290	-345	291	-195	293	427	531	380	380	228	127	540	78	219
381	564	-289	-344	292	201	294	-426	532	381	381	229	449	418	79	-218
382	565	-288	-343	293	-84	-547	-425	533	382	382	-230	-448	311	-62	-217
383	566	-287	569	-123	186	-546	105	534	383	383	231	-447	312	-61	-151
384	567	-286	570	-122	-589	-553	-104	280	384	384	232	-446	313	-60	-150
385	568	-285	571	219	103	-111	295	-312	385	385	-146	-175	314	-59	-149
386	569	-284	572	-218	104	-110	-296	619	386	386	145	-409	315	-23	-148
387	570	-283	573	-217	393	-109	297	620	387	387	-144	-393	316	159	-147
388	571	-282	574	-151	394	-108	298	-246	388	388	-143	-70	317	160	-146
389	572	-281	461	-150	-353	-107	-541	-457	389	389	46	-94	318	161	145
390	573	-280	575	-149	-352	-106	545	-456	390	390	47	-140	319	162	-144
391	574	-279	576	-148	351	-102	278	-411	391	391	48	-466	320	163	-143
392	575	-278	577	-251	-350	-101	-279	82	392	392	49	-465	321	-35	-142
393	576	-277	578	-478	606	-100	535	-568	393	393	116	36	322	-34	-141
394	577	-276	579	-470	-607	-471	-323	85	394	394	117	561	605	53	-140
395	578	-275	-370	-583	-493	379	-12	86	395	395	350	-562	606	54	-517
396	579	-274	337	-582	344	-277	-191	87	396	396	351	563	607	55	-516
397	580	-273	338	-581	-521	291	-190	519	397	397	352	564	608	56	-515
398	581	-272	371	429	-514	428	-189	520	398	398	353	565	609	57	-477
399	582	-271	372	430	513	429	331	-215	399	399	354	566	610	58	-482
400	583	-270	-593	431	-512	-540	332	-24	400	400	355	567	267	-621	-127
401	584	-269	-592	432	-464	539	333	221	401	401	356	-84	268	-620	246
402	585	-268	-591	433	-463	-538	-299	-437	402	402	612	-83	269	-619	5
403	586	-267	-590	434	-149	-537	287	-436	403	403	-508	581	-483	-618	-162
404	587	-266	-589	435	-148	-536	288	-290	404	404	293	582	112	-617	-160
405	588	-265	-588	350	-147	322	289	-289	405	405	294	583	113	-52	-159
406	589	-264	-587	351	-146	421	290	-288	406	406	-547	415	114	-51	23
407	590	-263	-586	352	145	-349	436	-287	407	407	-546	188	115	-50	59
408	591	-262	-585	353	-144	-348	437	-552	408	408	-553	137	-307	-49	60
409	592	-261	-584	354	-411	-347	498	-551	409	409	-111	-21	-306	-48	61
410	593	-260	-583	355	58	270	499	106	410	410	-110	-81	-305	-47	475
411	594	-259	-582	356	470	-272	-282	107	411	411	-109	-511	-304	-46	476
412	595	-258	-581	612	151	-271	-281	108	412	412	-108	-593	-303	-45	474
413	596	-257	-580	395	217	273	-280	109	413	413	-107	592	-302	-44	-473
414	256	-256	339	-334	218	-420	-534	576	414	414	-106	-591	-301	-43	-472
415	257	-255	340	-333	-219	-419	-533	577	415	415	551	-590	491	-42	-471
416	258	-254	341	-332	-376	-15	-532	578	416	416	552	-589	492	-41	379
417	259	-253	342	-331	-256	160	-531	579	417	417	560	-480	-485	-40	-277
418	260	-252	-568	-330	-255	162	-530	580	418	418	559	-479	-484	-39	-276
419	261	-251	-567	-329	-417	-5	-529	419	419	419	-558	-478	-275	-38	118
420	262	-250	-566	-328	-583	-365	25	420	420	420	-557	-481	-274	-37	119
421	263	-249	-565	176	398	364	26	-273	421	421	-556	461	493	-36	120
422	264	-248	-564	-177	399	-338	27	271	422	422	500	575	494	164	-548
423	265	-247	-563	178	252	-337	28	272	423	423	-476	576	495	165	-284
424	266	-246	562	179	253	-221	29	-270	424	424	-475	577	-215	166	-283
425	267	-245	-561	180	254	24	30	347	425	425	-61	578	-214	167	-282
426	-474	-244	490	181	-9	247	31	348	426	426	-60	579	-213	-98	-281
427	-473	-243	-488	-405	-8	248	32	349	427	427	-59	580	-138	-97	-280
428	-472	-242	-487	-404	-7	587	-43	-421	428	428	-23	-37	380	-96	279
429	-471	-241	-486	-403	-6	588	-42	-322	429	429	159	-463	381	-95	-278
430	-470	-240	483	-199	530	-16	-41	536	430	430	-22	-462	382	18	-545
431	-469	-239	276	-524	-531	-310	-40	537	431	431	542	161	383	19	541
432	-468	-238	277	-523	532	-497	-39	538	432	432	543	-166	384	-220	76
433	-467	-237	-119	-522	533	-496	-38	-539	433	433	544	-51	385	219	-511
434	-466	-236	-118	-521	471	-495	-37	540	434	434	-435	-50	386	-218	-510
435	-465	-235	-117	-520	401	-494	-463	-299	435	435	434	-95	387	-217	-509
436	-464	-234	-116	-519	474	-493	-462	112	436	436	-433	-458	388	-151	613
437	-463	-233	324	440	213	274	-461	113	437	437	-432	227	389	-150	614
438	-462	-232	-597	441	214	275	161	114	438	438	-431	228	390	-149	615
439	-461	-231	294	428	-188	484	-166	-355	439	439	-430	229	391	-148	616
440	-460	-230	295	507	-274	485	-51	-354	440	440	-67	-230	392	-147	-300
441	-459	-229	296	508	500	557	-50	-353	441	441	-66	231	393	-146	-299
442	-458	-228	308	-14	-483	558	-95	-352	442	442	459	232	394	145	295
443	-457	-227	309	-13	292	-559	-458	-351	443	443	474	-146	395	-144	296
444	-456	-226	498	-12	481	-560	227	-350	444	444	-473	145	-90	-143	297
445	-455	-225	499	-11	-480	-552	228	-117	445	445	-472	-144	-89	-142	298
446	-454	-224	500	-10	-479	-551	229	-323	446	446	-471	-143	413	-141	-442
447	-453	-223	501	-9	-478	103	-230	-517	447	447	379	46	414	-140	-378
448	-452	-222	502	-8	556	-286	231	-516	448	448	-277	47	415	-517	-377
449	-451	-221	-503	-7	-570	-285	232	556	449	449	291	48	416	-516	339
450	-450	-220	504	-6	173	-269	-146	557	450	450	428	49	417	-515	340
451	-449	-219	505	-5	-367	315	145	558	451	451	429	116	255	22	341
452	-448	-218	506	-264	-366	316	-144	-559	452	452	-540	117	256	15	79
453	-447	-217	-425	-263	-590	317	-143	-560	453	453	539	350	376	16	-62
454	-446	-216	-424	-262	573	318	46	-395	454	454	-538	351	-375	-221	-188
455	-445	-215	-423	-261	574	319	47	-394	455	455	-537	352	-374	24	584
456	-444	-214	-422	-260	-400	320	48	149	456	456	-536	353	-373	25	585
457	-443	173	-421	-259	-264	321	49	234	457	457	322	354	-372	26	586
458	-442	174	-349	-258	76	-554	116	235	458	458	421	355	257	27	587
459	-441	175	-348	-257	-73	305	117	236	459	459	-349	356	258	28	588
460	-440	176	-347	372	-72	-307	350	237	460	460	-348	612	259	29	589
461	-439	177	270	373	-71	96	351	238	461	461	-347	-508	260	30	590
462	-438	178	271	374	-70	97	352	239	462	462	270	293	261	31	591
463	-437	179	-272	375	436	-363	353	240	463	463	-272	294	262	32	-592
464	-436	180	273	-376	437	-362	354	241	464	464	-271	-547	263	33	593
465	-435	-378	-420	-256	438	-264	355	242	465	465	273	-546	264	-616	594
466	-434	-377	-419	295	-550	-263	356	-45	466	466	-420	-553	-487	-615	325
467	-433	-376	-310	296	-549	-262	612	-44	467	467	-419	-111	-486	-614	326
468	-432	-375	-497	-275	284	-261	-508	33	468	468	-15	-110	-111	-613	327
469	-431	-374	-496	-341	548	-260	293	-148	469	469	160	-109	-110	509	328
470	-430	-373	489	79	-87	-259	294	187	470	470	162	-108	-109	510	329
471	-429	-372	-441	-62	69	-258	-547	366	471	471	-5	-107	-108	511	330
472	-428	-371	-426	-61	516	-257	-546	367	472	472	-365	-106	-107	512	331
473	-427	-370	507	-60	290	-483	-553	-71	473	473	364	551	-106	-513	332
474	-426	-369	508	496	291	112	421	336	474	474	-338	552	-105	514	333
475	-425	-368	-612	497	-447	113	-349	-14	475	475	-337	560	104	-21	334
476	-424	-367	-356	310	-584	114	-348	219	476	476	-221	559	-103	-20	335
477	-423	-366	-355	419	620	115	-347	-218	477	477	24	-558	-102	1	336
478	-422	-365	-537	420	621	-304	270	-575	478	478	247	-557	-101	2	-14
479	-421	-364	-536	-273	569	-422	-272	-461	479	479	248	-556	-100	3	-13
480	-420	-363	-535	272	-172	-268	-271	481	480	480	587	500	-99	4	-12
481	-419	485	-534	-271	-89	-267	273	478	481	481	588	-476	168	247	-11
482	-418	486	-533	-270	236	-610	-420	479	482	482	-16	-475	266	248	-10
483	-417	487	-315	347	141	-609	-419	480	483	483	-310	-61	611	249	362
484	-416	488	-314	348	142	-608	-15	589	484	484	-497	-60	357	250	363
485	-415	489	-313	484	143	-607	160	590	485	485	-496	-59	-290	251	-97
486	-414	490	-312	-544	-79	-606	162	591	486	486	-495	-23	-289	252	-96
487	-413	491	-311	187	-341	-605	-5	-592	487	487	-494	159	-288	253	-95
488	-412	492	-418	-482	-340	549	-365	593	488	488	-493	-22	-287	254	-495
489	-411	493	527	-346	-339	550	364	511	489	489	274	542	436	362	-494
490	-410	494	528	188	-300	-300	-338	-134	490	490	275	543	437	363	-493
491	-409	495	529	136	-299	334	-337	282	491	491	484	544	438	257	274
492	-408	496	530	137	295	621	-221	-499	492	492	485	-435	439	258	275
493	-407	497	531	-379	296	-460	24	-498	493	493	-492	434	440	259	484
494	-406	498	532	471	499	489	247	337	494	494	-491	-433	441	260	485
495	-405	499	-357	472	422	490	248	338	495	495	301	-432	-604	261	-492
496	-404	500	-611	473	-302	-488	587	167	496	496	302	-431	-603	262	-491
497	-403	501	-266	474	-301	418	588	-98	497	497	303	-430	-602	263	301
498	-402	502	-168	-476	491	-120	-16	342	498	498	423	-67	-601	264	302
499	-401	503	99	-475	320	-119	-310	198	499	499	424	-66	-600	526	303
500	-400	504	100	-135	321	-118	-497	199	500	500	-487	285	-599	-361	304
501	-399	505	101	-197	322	276	-496	403	501	501	-486	286	-598	-360	305
502	-398	506	102	-111	566	-492	-495	404	502	502	501	-103	595	-359	306
503	-397	507	103	-110	567	-491	-494	550	503	503	502	-102	596	121	307
504	-396	508	-104	-109	-207	301	-493	-300	504	504	-503	-101	597	122	-222
505	-395	509	105	-108	153	302	274	334	505	505	504	-100	-324	123	17
506	-394	510	106	-107	-475	303	118	-333	506	506	-306	-99	116	124	-158
507	-393	511	107	-106	-546	423	119	-332	507	507	505	168	117	125	-157
508	-392	512	108	-105	547	424	120	-331	508	508	506	266	118	126	-156
509	-391	513	109	-104	-294	-487	554	330	509	509	507	611	119	127	-155
510	-390	514	110	-103	-508	-486	312	-329	510	510	323	357	120	128	-154
511	-389	515	111	-102	431	501	-438	-328	511	511	-535	358	519	129	-153
512	-388	516	112	-101	432	502	-309	-327	512	512	279	308	520	130	-152
513	-387	517	-113	-100	433	-503	-308	-326	513	513	-278	309	521	131	415
514	-386	518	114	-99	434	504	-358	-325	514	514	-545	438	522	132	416
515	-385	519	115	168	78	-306	-357	505	515	515	541	-312	523	475	417
516	-384	520	-307	266	-614	505	-611	506	516	516	-298	619	524	476	255
517	-383	521	-306	611	-520	506	-266	43	517	517	-297	620	251	474	256
518	-382	522	-305	357	-413	507	-168	-32	518	518	296	-246	252	-473	376
519	-381	523	-352	-358	-311	323	99	-31	519	519	-295	617	253	-472	-375
520	-380	524	-351	-504	-418	-535	100	-30	520	520	104	618	254	-471	-374
521	-379	525	-350	503	-347	279	101	-29	521	521	-105	-311	362	379	-373
522	181	526	-492	-502	-293	-278	102	-28	522	522	425	-548	363	380	-372
523	182	527	-491	-501	-427	-545	103	-27	523	523	426	-284	-97	381	257
524	183	528	-495	-500	-250	541	-286	-26	524	524	-427	-283	-96	382	258
525	184	529	-494	-499	-578	-298	-285	173	525	525	292	-555	-95	383	259
526	185	530	-493	427	157	-297	-269	174	526	526	-604	527	18	384	260
527	186	531	274	-426	-96	296	174	-69	527	527	-603	528	19	385	261
528	187	532	275	-425	571	-295	-69	-68	528	528	-602	324	-220	386	262
529	188	533	484	-424	62	104	-68	372	529	529	-601	-597	219	387	263
530	189	534	485	-423	592	-105	372	-91	530	530	600	-596	-218	388	264
531	190	535	-269	-422	-591	425	-91	525	531	531	-599	-595	-217	389	-186
532	191	536	-268	-421	-187	426	525	265	532	532	-598	598	-151	390	-185
533	192	537	-267	-349	612	-427	265	169	533	533	595	599	-150	391	-184
534	193	538	-610	299	428	292	169	205	534	534	596	-600	-149	392	-183
535	194	539	-609	300	429	-604	170	-206	535	535	597	601	-148	393	-182
536	195	540	-608	-495	430	-603	-147	443	536	536	-324	602	-147	394	406
537	196	541	-607	-494	379	-602	233	444	537	537	-528	603	-146	395	407
538	197	542	-606	-493	11	-601	616	445	538	538	-527	604	145	396	93
539	198	543	-605	-580	-517	166	-361	374	539	539	555	-292	-144	397	94
540	199	544	-604	-579	-289	-161	-410	375	540	540	283	427	-143	398	337
541	200	545	-603	-578	-288	462	216	-376	541	541	284	-426	-142	399	338
542	201	546	602	-577	-287	463	408	-256	542	542	548	-425	-141	400	-364
543	202	547	-601	-576	117	37	394	-255	543	543	311	105	-140	401	365
544	203	548	-600	-344	-605	38	395	99	544	544	-618	-104	-517	402	478
545	204	549	-599	-343	-216	39	-90	100	545	545	-617	295	-516	-468	479
546	205	550	-427	-342	410	40	-89	101	546	546	246	-296	-515	-467	480
547	206	551	-440	98	-57	-46	413	102	547	547	-620	297	-477	-466	-481
548	207	298	-439	-167	-56	143	414	275	548	548	-619	298	478	-465	461
549	208	299	-438	-76	-364	144	512	484	549	549	312	-250	479	-464	575
550	209	300	437	-74	365	-145	-513	485	550	550	-438	-249	480	-463	576
551	210	301	-436	75	51	146	514	-492	551	551	-309	-586	-481	-462	577
552	211	302	553	-412	-50	-232	-521	-491	552	552	-308	467	461	-460	578
553	212	303	554	244	402	-231	-520	301	553	553	-358	468	575	-459	579
554	213	304	555	245	-412	230	-519	302	554	554	-357	-402	576	-458	580
555	214	305	556	246	244	-229	223	303	555	555	-611	-401	577	-457	581
556	215	306	557	-69	245	-228	224	423	556	556	-266	-400	578	-456	582
557	216	307	558	-68	-243	-227	225	424	557	557	-168	-399	579	244	583
558	217	308	-559	-67	242	458	226	-487	558	558	99	-398	580	245	346
559	218	309	-560	-66	-241	95	1	-486	559	559	100	-397	581	246	128
560	219	310	-552	-65	-240	50	-470	-535	560	560	101	-396	582	5	129
561	220	311	-551	477	-239	51	423	-90	561	561	102	77	583	6	130
562	221	312	-550	129	-238	165	424	-89	562	562	103	-346	584	7	131
563	222	313	-549	130	-237	600	-487	413	563	563	-286	76	585	8	132
564	223	314	-548	-16	137	-599	-486	414	564	564	-285	-80	586	9	133
565	224	315	-547	-15	204	-598	501	512	565	565	-269	-93	587	10	134
566	225	316	546	-22	-4	595	502	-277	566	566	-276	-179	588	11	198
567	226	317	-545	527	-3	596	-503	291	567	567	118	450	589	12	199
568	227	318	541	528	-2	597	504	428	568	568	119	138	590	13	403
569	228	319	542	529	-1	-324	-306	38	569	569	120	-251	591	14	404
570	229	320	543	530	-375	-528	505	39	570	570	-418	-524	592	-94	405
571	230	321	544	531	572	-527	506	40	571	571	488	-523	593	-93	-181
572	231	322	-435	532	424	555	507	41	572	572	-490	-522	594	-92	-180
573	232	323	-434	533	160	283	-440	42	573	573	-489	-454	325	-91	-179
574	233	324	-433	534	162	284	-439	507	574	574	460	-453	326	-90	-178
575	234	325	432	-311	-5	548	313	-408	575	575	-621	-452	327	-89	-177
576	235	326	-431	-418	507	311	314	-216	576	576	-334	-142	328	-88	-176
577	236	327	302	-540	262	-618	315	410	577	577	300	-141	329	-87	-445
578	237	328	303	-539	-260	-617	316	361	578	578	-550	-73	330	-86	-444
579	238	329	304	-538	259	246	317	144	579	579	-549	-72	331	-85	-443
580	239	330	353	-537	-258	-620	318	-145	580	580	605	-71	332	-84	285
581	240	331	354	-536	-308	-619	319	146	581	581	606	621	333	-83	286
582	241	332	538	-535	-115	312	320	-232	582	582	607	-460	334	-82	-412
583	242	333	539	312	-114	-438	321	-231	583	583	608	489	335	-81	244
584	243	334	540	313	-113	-309	619	230	584	584	609	490	336	-80	245
585	244	335	291	314	-112	-308	620	-229	585	585	610	-488	-14	-73	617
586	245	336	292	315	439	-358	-246	-228	586	586	267	418	-13	-72	618
587	246	337	301	316	440	-357	418	-227	587	587	268	-120	-12	-71	619
588	247	338	-430	317	-506	-611	305	458	588	588	422	-119	-11	-70	620
589	248	339	-429	318	-28	-266	-307	95	589	589	304	-118	-10	-69	621
590	249	590	-428	319	-27	-168	96	50	590	590	-115	276	-9	-68	-460
591	250	591	-598	320	-26	99	97	51	591	591	-114	269	-8	-67	-459
592	251	592	595	321	-25	472	-363	166	592	592	-113	-483	-7	-66	-458
593	252	593	596	322	165	473	-362	-161	593	593	-112	112	-6	-65	-457
594	253	594	-293	605	164	-474	-264	462	594	594	483	113	-5	470	-456
595	254	595	-300	606	163	-459	-263	463	595	595	257	114	-246	-540	-411
596	255	596	-299	607	535	66	-262	37	596	596	258	115	-245	-539	-410
597	597	597	-298	608	-536	67	-261	-304	597	597	259	-304	-244	-538	216
598	598	598	-297	-323	537	430	-260	-422	598	598	260	-422	412	-537	408
599	599	599	-323	-400	538	431	-259	-268	599	599	261	-268	-75	-536	409
600	600	600	288	-399	539	432	-258	-267	600	600	262	-267	74	-535	-292
601	601	601	-287	-398	540	433	-257	-610	601	601	263	-610	76	-534	-291
602	602	602	-286	-397	119	-434	-483	-609	602	602	264	-609	167	-533	167
603	603	603	-285	-396	120	435	112	-608	603	603	362	-608	-98	-532	-98
604	604	604	-284	77	269	-544	113	-607	604	604	363	-607	342	-531	342
605	605	605	-283	-171	122	-543	114	-606	605	605	-97	-606	343	-530	343
606	606	606	-282	-170	123	-542	115	-605	606	606	-96	-605	344	-529	344
607	607	607	-281	-169	124	22	-304	307	607	607	307	307	345	-528	345
608	608	608	-280	-265	77	-159	-422	-305	608	608	-305	-305	-574	-527	-574
609	609	609	279	-525	-171	23	-268	554	609	609	554	554	-573	418	-573
610	610	610	-289	91	-170	59	-267	-321	610	610	-321	-321	-572	311	-572
611	611	611	290	-191	-169	60	-610	-320	611	611	-320	-320	-571	312	-571
612	612	612	316	-190	-265	61	-609	-319	612	612	-319	-319	-570	313	-570
613	613	613	-317	-189	525	475	-608	-318	613	613	-318	-318	-569	314	-569
614	614	614	318	-132	91	476	-607	-317	614	614	-317	-317	-568	315	-568
615	615	615	-319	-131	-191	-500	-606	-316	615	615	-316	-316	-567	316	-567
616	616	616	-278	29	-190	556	-605	-315	616	616	-315	-315	-566	317	-566
617	617	617	-358	-221	-102	-314	549	-314	617	617	-314	-314	-565	318	-565
618	618	618	-120	24	75	313	550	-313	618	618	-313	-313	-564	319	-564
619	619	619	320	25	557	439	-300	439	619	619	439	439	-563	320	-563
620	620	620	-321	-26	150	440	334	440	620	620	440	440	562	321	562
621	621	621	322	27	-33	441	621	441	621	621	441	441	-561	322	-561
A-cent	A-cent	A-cent	A-cent	A-cent	A-cent	A-cent	A-cent	A-cent	A-cent	A-cent	A-cent	A-cent	A-cent	A-cent	A-cent
B-telo	B-telo	B-telo	B-telo	B-telo	B-telo	B-telo	B-telo	B-telo	B-telo	B-telo	B-telo	B-telo	B-telo	B-telo	B-telo
622	622	622	-809	-624	1038	622	622	622	622	622	622	622	622	622	622
623	623	623	820	-623	661	624	624	624	623	623	624	624	623	623	623
624	624	624	821	-622	-715	625	625	625	624	624	625	625	624	624	624
625	625	625	822	625	932	728	728	728	625	625	728	728	625	625	625
626	626	626	1030	728	933	729	729	729	626	626	729	729	728	728	728
627	627	627	1031	729	-929	730	730	730	627	627	730	730	729	729	729
628	628	628	-1029	730	-928	-831	-831	-831	628	628	-831	-831	730	730	730
629	629	629	-1028	-648	630	-830	-830	-830	629	629	-830	-830	-648	-648	-648
630	630	630	-1027	-658	771	-746	-746	-746	630	630	-746	-746	-647	-647	-647
631	631	631	-1026	-1035	-710	-1054	-1054	-1054	631	631	-1054	-1054	-646	-646	-646
632	632	632	-1025	-1034	-709	-1053	-1053	-1053	632	632	-1053	-1053	-645	-645	-645
633	633	633	-1024	-1033	-653	-1052	-932	-1052	633	633	-1052	-1052	-644	-644	-644
634	634	634	-1023	-1032	-868	-1051	715	-1051	634	634	-1051	-1051	-643	-643	-643
635	635	635	-1022	823	-867	-1050	716	-1050	635	635	-1050	-1050	-642	-642	-642
636	636	636	693	824	-866	-1049	717	-1049	636	636	-1049	-1049	-641	-641	-641
637	637	637	694	-950	-865	-1048	951	-1048	637	637	-1048	-1048	-640	-640	-640
638	638	638	-695	-949	-864	757	952	757	638	638	757	757	-639	-639	-639
639	639	639	696	-948	-910	-754	1062	-754	639	639	-754	-754	-638	-638	-638
640	640	640	697	-947	909	-753	-1076	-753	640	640	-753	-753	637	-637	637
641	641	641	699	-913	-908	929	-1075	929	641	641	929	929	-636	-636	-636
642	642	642	700	-912	898	-1032	-674	-1032	642	642	-1032	-1032	-635	-635	-635
643	643	643	701	914	703	823	-673	823	643	643	823	823	-634	-634	-634
644	644	644	702	-946	969	-751	-672	-751	644	644	-751	-751	-633	-633	-633
645	645	645	-1011	1047	970	-920	-747	-920	645	645	-920	-920	-632	-632	-632
646	646	646	-1010	1048	971	956	-660	956	646	646	956	956	-631	-631	-631
647	647	647	-1009	1049	-972	957	762	957	647	647	957	957	829	-630	829
648	648	648	-1008	743	973	958	763	958	648	648	958	958	830	-629	830
649	649	649	-1007	-1055	-948	959	764	959	649	649	959	959	831	-628	831
650	650	650	-1006	-745	-714	960	-765	960	650	650	960	960	832	-627	832
651	651	651	-1005	-744	-713	-961	766	-961	651	651	-961	-961	833	-626	833
652	652	652	-1004	-1056	920	962	-683	735	652	652	962	962	834	-727	834
653	653	653	-1003	1057	921	963	-682	737	653	653	963	963	835	-726	835
654	654	654	-1002	1058	662	964	-851	738	654	654	964	964	836	-725	836
655	655	655	-1001	1059	663	-836	-850	739	655	655	-836	-836	837	1080	-964
656	656	656	-1000	1060	-1070	-835	-680	740	656	656	-835	-835	838	1081	-963
657	657	657	-999	1061	-1069	-834	681	1114	657	657	-834	-834	839	1082	-962
658	658	658	-998	1062	1068	-1131	852	1115	658	658	-1131	-1131	840	-1072	-961
659	659	659	730	-1076	-1067	671	853	1116	659	659	671	671	841	-1071	-960
660	660	660	-728	-657	-1066	748	-758	-955	660	660	748	748	842	-1070	-959
661	661	661	642	-656	-1065	749	755	-954	661	661	749	749	720	-1069	-958
662	662	662	643	-655	-1064	750	756	-953	662	662	750	750	721	-1068	-957
663	663	663	644	-654	-855	724	744	-1061	663	663	984	-911	722	-1067	-956
664	664	664	622	-653	-1063	-1079	745	-1060	664	664	-805	-916	723	-1066	-955
665	665	665	723	-652	1077	-1078	1055	-1059	665	665	-884	914	724	-1065	-954
666	666	666	724	-651	-1078	-732	-1082	-1058	666	666	-883	912	-1079	-1064	-953
667	667	667	1082	-650	1079	-734	-1081	-1057	667	667	-882	913	-1078	-1063	-952
668	668	668	-625	-649	-717	-733	725	-1056	668	668	-881	-915	-1077	1077	-951
669	669	669	-624	731	-716	-731	726	-1126	669	669	880	917	1063	1078	-717
670	670	670	-623	732	922	649	727	-1125	670	670	-879	918	1064	1079	-716
671	671	671	729	733	-959	650	626	-848	671	671	1138	-919	1065	-724	-715
672	672	672	1063	734	-958	651	627	-847	672	672	-1112	931	1066	-723	932
673	673	673	1064	735	957	652	628	-846	673	673	1110	-930	1067	-722	933
674	674	674	1065	736	-956	-713	629	-845	674	674	1111	934	1068	-721	-929
675	675	675	1066	737	-955	-712	630	-844	675	675	-1109	935	1069	-720	-928
676	676	676	1067	738	954	-711	-720	-1074	676	676	-1108	936	1070	-842	-927
677	677	677	1068	739	-953	772	-842	-1073	677	677	-1107	770	1071	-841	-926
678	678	678	1069	740	-952	773	841	1083	678	678	-801	771	1072	-840	-925
679	679	679	1070	741	-951	774	-840	1084	679	679	-800	-710	-1082	-839	-924
680	680	680	1071	742	-724	775	-1041	-859	680	680	-1022	-873	-1081	-838	-923
681	681	681	1072	-942	722	-833	1042	-858	681	681	693	-872	-1080	-837	-922
682	682	682	1073	644	723	-832	949	-857	682	682	694	-871	725	-836	-921
683	683	683	1074	-669	900	-648	950	-856	683	683	-695	-870	726	-835	-920
684	684	684	647	-668	905	-647	-1080	-855	684	684	885	-869	727	-834	-1116
685	685	685	648	-667	1090	-646	933	-854	685	685	886	-868	626	-833	-1115
686	686	686	645	-666	-638	-645	1033	-719	686	686	887	-867	627	-832	-1114
687	687	687	646	665	637	-644	1034	-718	687	687	888	-895	628	-831	-1113
688	688	688	1075	-664	-636	-643	1035	1080	688	688	889	894	629	-830	1013
689	689	689	1076	-663	962	-642	-670	-950	689	689	890	1002	630	-829	1014
690	690	690	-1062	-662	-640	-641	761	-949	690	690	891	984	-828	-828	1015
691	691	691	-1061	-661	-961	-640	-659	-1042	691	691	-700	-805	-827	-827	1016
692	692	692	-1060	-1039	-960	-639	-658	1041	692	692	821	-884	-826	-826	1017
693	693	693	-1059	-1038	923	-638	-657	840	693	693	-623	-883	-825	-825	1018
694	694	694	-1058	-1037	925	637	-656	841	694	694	-1150	-882	-824	-824	1019
695	695	695	-1057	-1036	-721	-636	655	842	695	695	-1149	-881	-823	-823	1020
696	696	696	-1056	-1075	-1128	-635	-654	720	696	696	-1148	880	1032	1032	1021
697	697	697	-1055	-1074	-1127	-634	-708	-630	697	697	-1147	-879	1033	1033	-692
698	698	698	1054	-1073	-1132	-633	-707	-629	698	698	-798	1138	1034	1034	-1047
699	699	699	-1053	1083	776	-632	-706	-628	699	699	797	-1112	1035	1035	-1046
700	700	700	-1052	1084	-777	-1072	834	-627	700	700	-796	1110	1036	1036	-1045
701	701	701	-1051	-859	778	-1071	835	-626	701	701	-795	1111	1037	1037	-1044
702	702	702	-1050	-858	-779	-1070	836	-727	702	702	794	-1109	1038	1038	-1043
703	703	703	-1049	-844	780	-1069	-964	-726	703	703	-793	-1108	1039	1039	-1042
704	704	704	-1048	1117	781	-1068	-963	-725	704	704	792	-1107	1040	1040	-1041
705	705	705	-1047	1118	782	-1067	-962	1081	705	705	-791	-801	1041	1041	-1040
706	706	706	1115	1119	783	-1066	961	1082	706	706	785	-800	1042	1042	-1039
707	707	707	1116	1120	784	1065	-960	-1055	707	707	786	-1022	1043	1043	-660
708	708	708	-936	1121	785	-1064	-959	-745	708	708	787	693	1044	1044	-659
709	709	709	-935	1122	786	-1063	-958	-744	709	709	788	694	1045	1045	-658
710	710	710	-848	1123	787	1077	-957	-756	710	710	-809	-695	1046	1046	-657
711	711	711	-847	1124	788	735	-956	-755	711	711	820	885	1047	1047	-656
712	712	712	944	1125	789	737	920	758	712	712	-1133	886	1048	1048	655
713	713	713	945	1126	790	738	751	-853	713	713	-1132	887	1049	1049	-654
714	714	714	705	1127	791	739	-823	-852	714	714	776	888	1050	1050	-708
715	715	715	706	1128	-792	740	1032	-681	715	715	777	889	1051	1051	-707
716	716	716	707	1129	793	1114	-929	680	716	716	778	890	1052	1052	-706
717	717	717	774	943	794	1115	753	850	717	717	-779	891	1053	1053	-705
718	718	718	775	944	795	1116	754	851	718	718	780	-700	1054	1054	-945
719	719	719	650	945	975	-955	-757	682	719	719	781	821	746	1055	-944
720	720	720	651	705	796	-954	1048	683	720	720	-1134	-623	747	1056	-943
721	721	721	652	706	-797	-953	1049	-766	721	721	-699	-1150	748	1057	-942
722	722	722	653	707	798	-1061	1050	765	722	722	-698	-1149	749	1058	-941
723	723	723	654	708	1147	-1060	1051	-764	723	723	-697	-1148	750	1059	-843
724	724	724	655	709	1148	-1059	1052	-763	724	724	-900	-1147	751	1060	-853
725	725	725	656	710	1149	-1058	718	-762	725	725	-899	-798	752	1061	-852
726	726	726	-1094	-771	1150	-1057	719	660	726	726	-898	797	753	1062	-681
727	727	727	-1093	-770	-1098	-1056	854	747	727	727	908	-796	-757	-1076	-680
728	728	728	-1092	-936	-886	-1126	855	672	728	728	909	-795	-756	-1075	-679
729	729	729	-1091	-935	-885	-1125	856	673	729	729	910	794	-755	-1074	-678
730	730	730	-1090	-934	-804	-848	857	674	730	730	1090	-793	-754	-1073	-677
731	731	731	-1089	-933	-803	-847	858	1075	731	731	1091	792	758	1083	-676
732	732	732	-1088	-932	-802	-846	859	1076	732	732	701	-791	759	1084	-675
733	733	733	-1087	715	-847	-845	-1084	-713	733	733	702	785	760	-859	674
734	734	734	698	716	-846	-844	-1083	-712	734	734	703	786	761	-858	-673
735	735	735	-1086	717	-967	-1074	1073	-711	735	735	969	787	762	-857	-672
736	736	736	-1085	951	-966	-1073	-1045	772	736	736	970	788	763	-856	-671
737	737	737	860	953	-965	1083	1044	773	737	737	971	-809	764	-855	-670
738	738	738	861	954	837	1084	-1043	774	738	738	972	820	-765	-854	-775
739	739	739	862	955	838	-859	-948	775	739	739	973	-1133	766	-853	-774
740	740	740	863	-647	839	-858	-947	932	740	740	974	-1132	767	-852	-773
741	741	741	864	-646	-629	-857	-946	933	741	741	975	776	768	-681	-772
742	742	742	865	-645	-950	-856	-704	1033	742	742	976	777	769	-680	711
743	743	743	-906	750	-949	-855	849	1034	743	743	977	778	-940	-679	712
744	744	744	-905	751	974	-854	-679	1035	744	744	978	-779	-939	-678	713
745	745	745	-904	752	976	-719	678	-670	745	745	979	780	-938	-677	714
746	746	746	720	839	977	-718	-677	761	746	746	980	781	-937	-676	937
747	747	747	721	840	978	923	-676	-659	747	747	981	-1134	-714	-675	938
748	748	748	722	841	979	924	-1071	-658	748	748	-1095	-699	-713	-674	939
749	749	749	1083	842	-980	925	-1070	-657	749	749	-1094	-698	-712	-673	940
750	750	750	1084	720	981	926	-1069	-656	750	750	-1093	-697	-711	-672	-769
751	751	-842	-859	721	982	927	-1068	655	751	751	-1092	-900	772	-671	-768
752	752	-841	-858	722	-983	928	-1067	-654	752	752	-866	-899	773	-670	-767
753	753	-840	-857	723	-1030	-752	975	-708	753	753	-865	-898	774	-669	684
754	754	-839	-856	724	-822	824	976	-707	754	754	-1023	908	775	-668	685
755	755	-838	-855	-1079	-821	825	977	-706	755	755	-1102	909	670	-667	686
756	756	-837	-854	-1078	700	826	-978	-968	756	756	-1101	910	671	-666	687
757	757	-836	853	-1077	701	827	979	-967	757	757	-1100	1090	672	665	688
758	758	-835	-852	1063	-915	828	980	-966	758	758	-1099	1091	673	-664	689
759	759	-834	-681	1064	-911	721	981	-965	759	759	-1098	701	674	-663	690
760	760	-833	-680	1065	-916	722	-1095	837	760	760	822	702	675	-662	691
761	761	-832	-679	1066	914	723	-1094	838	761	761	1030	703	676	-661	1048
762	762	-831	-678	1067	-912	811	-1093	839	762	762	1031	969	677	-660	1049
763	763	-830	-677	1068	913	812	-1092	-1040	763	763	1001	970	678	-659	1050
764	764	-829	-676	1069	-917	813	-866	-1039	764	764	-936	971	679	-658	1051
765	765	-828	-675	670	918	814	-865	769	765	765	-935	972	680	-657	1052
766	766	-827	-674	671	-919	815	-1023	-940	766	766	-934	973	681	-1094	1053
767	767	-826	-673	672	-931	816	-1102	-939	767	767	930	974	852	-1093	1054
768	768	-825	-672	673	-930	817	-1101	938	768	768	-931	975	853	-1092	746
769	769	-824	-671	674	934	-808	1036	-937	769	769	919	976	854	-1091	747
770	770	-823	-670	675	935	-819	1037	816	770	770	-918	977	855	-1090	748
771	771	-822	-669	676	936	-818	1038	817	771	771	-917	978	856	-1089	749
772	772	-821	-668	677	-775	-807	661	818	772	772	915	979	857	-1088	750
773	773	-820	-667	678	-1120	-806	662	863	773	773	-913	980	858	-1087	751
774	774	-819	-666	679	-1122	896	663	864	774	774	-912	981	859	-1086	752
775	775	-818	665	680	1123	897	664	-1024	775	775	-914	-1095	-1084	-1085	753
776	776	-817	-664	681	1124	-907	-665	1025	776	776	916	-1094	-1083	860	-757
777	777	-816	831	852	1125	-906	666	1026	777	777	911	-1093	1073	861	-756
778	778	-815	832	853	1101	-905	-1107	1027	778	778	-1002	-1092	1074	862	-755
779	779	-814	833	854	1102	-904	-801	1028	779	779	-894	-866	1075	863	-754
780	780	-813	834	855	1103	870	-800	1029	780	780	895	-865	1076	864	758
781	781	-812	-1035	856	1104	871	-1022	-1000	781	781	867	-1023	-1062	865	759
782	782	-811	-1034	857	1105	872	693	-999	782	782	868	-1102	-1061	866	760
783	783	-810	-1033	845	1106	873	-810	-998	783	783	869	-1101	-1060	867	761
784	784	-809	-846	846	-660	710	789	-997	784	784	870	-1100	-1059	868	762
785	785	-808	-845	-1071	-659	-771	790	1130	785	785	871	-1099	-1058	869	763
786	786	-807	-844	-1070	-658	-770	-784	921	786	786	872	-1098	-1057	870	764
787	787	-806	-940	-749	-657	-1124	783	922	787	787	873	822	-1056	871	-765
788	998	-805	-939	-748	-656	-1043	-782	923	788	788	710	1030	-1055	872	766
789	999	-804	-938	-747	655	-948	1135	924	789	789	-771	1031	-745	873	-683
790	1000	-803	-937	-746	-654	-947	-1012	925	-915	790	-770	1001	-744	874	-682
791	1001	-802	1117	-1054	-708	-946	-1011	926	-914	791	-1124	-1124	-743	875	-851
792	1002	-801	1118	-1053	-707	-704	-1010	897	-913	792	-1123	-1123	-742	876	-850
793	1003	-800	1119	-1052	705	849	-1009	-907	-912	793	-1122	-1122	-741	877	-849
794	1004	-799	1120	-958	706	-679	-1008	-906	-911	794	-1121	-1121	-740	878	704
795	1005	-798	1121	-957	-945	-678	-1007	-905	-910	795	-1120	-1120	-739	879	946
796	1006	-797	1122	-956	944	-677	-1006	-904	-909	796	-1119	-1119	-738	880	947
797	1007	-796	1123	659	-943	-676	-1005	1142	-908	797	-1118	-1118	-737	881	948
798	1008	-795	1124	660	-942	-675	-1004	1143	-907	798	-1117	-1117	-736	882	949
799	1009	-794	1125	1040	-941	-760	1003	1144	-906	799	-669	-669	-735	883	950
800	1010	-793	1126	1041	-843	-736	-1089	1145	-905	800	-668	-668	-734	884	718
801	1011	-792	1042	1042	-853	-759	-1088	-1146	-904	801	-667	-667	-733	805	719
802	1012	-791	1043	1043	-852	843	-1087	799	-903	802	-666	-666	-732	806	854
803	1013	-790	1044	1044	-681	941	1085	-878	-902	803	665	665	-731	807	855
804	1014	916	1045	1045	-680	942	1086	-877	-901	804	-664	-664	649	-808	856
805	1015	917	1046	1046	-679	943	860	876	-900	805	-663	-663	650	-819	857
806	1016	918	-1114	-704	-678	-945	861	-875	-899	806	-662	-662	651	-818	858
807	1017	919	-1113	849	-677	-944	862	-874	-898	807	-661	-661	652	-817	859
808	1018	920	1013	850	676	705	863	-716	-897	808	-1038	-1038	653	-816	-1084
809	1019	921	1014	-765	-675	1036	864	-715	-896	809	-1037	-1037	654	-815	-1083
810	1020	922	1015	766	674	1037	1024	-833	-895	810	-1036	-1036	655	-814	1073
811	1021	923	1016	767	-672	1038	1025	-832	-894	811	-705	-705	656	-813	1074
812	1022	924	1017	768	-671	661	1026	-648	-893	812	944	944	657	-812	844
813	1023	925	1018	769	673	662	1027	-647	-892	813	945	945	658	-811	845
814	1024	926	-1147	-940	-670	663	1028	-646	-891	814	-943	-943	659	-810	846
815	1025	927	-798	-939	1039	664	1029	-645	-890	815	-942	-942	660	-809	847
816	1026	928	-797	-938	1040	-665	-1000	-644	-889	816	-941	-941	661	820	848
817	1027	929	-796	-937	1041	666	-999	-643	-888	817	-843	-843	662	821	-968
818	1028	930	-795	1072	990	667	-998	-642	-887	818	759	759	663	822	-967
819	1029	931	-794	-1082	-991	668	-997	-641	-886	819	736	736	664	1030	-966
820	1030	932	-793	-1081	992	669	-996	-640	-885	820	760	760	-665	1031	-965
821	1031	933	792	-1080	993	1117	-995	-639	-884	821	675	675	666	-1029	837
822	1032	934	-791	725	994	1118	-994	-638	-883	822	676	676	667	-1028	838
823	1033	935	-790	726	995	1119	-993	637	-882	823	677	677	668	-1027	839
824	1034	936	-789	727	996	1120	-992	-636	-881	824	678	678	669	-1026	840
825	1035	937	996	626	-711	1121	-991	-635	-880	825	679	679	-1131	-1025	-841
826	-1296	938	997	-837	772	1122	1108	-634	-879	826	-849	-849	-1130	-1024	842
827	-1295	939	1077	-836	669	1123	1109	-633	-878	827	704	704	-1129	-1023	720
828	-1294	940	1078	-835	-1117	-1044	-1111	-632	-877	828	946	946	-1128	-1022	-630
829	-1293	941	-1079	-834	1118	1045	-1110	-1072	-876	829	947	947	-1127	693	-629
830	-1292	942	810	-833	1119	1046	1112	-1071	-875	830	948	948	-1126	694	-628
831	-1291	943	811	-832	-1121	1047	-1138	-1070	-874	831	1043	1043	-1125	-695	-627
832	-1290	944	812	-831	-774	692	879	-1069	-873	832	-1044	-1044	-1124	696	-626
833	-1289	945	813	-830	-773	-1021	-880	-1068	-872	833	1045	1045	-1123	697	-727
834	-1288	946	814	-829	-668	-1020	881	-1067	-871	834	1046	1046	-1122	698	-726
835	-1287	947	815	631	-892	-1019	882	-1066	-870	835	1047	1047	-1121	699	-725
836	-1286	948	816	632	-891	-1018	883	1065	-869	836	692	692	-1120	700	1080
837	-1285	949	817	633	-890	-1017	884	-1064	-868	837	-1021	-1021	-1119	701	1081
838	-1284	950	818	634	-889	-1016	805	-1063	-867	838	-1020	-1020	-1118	702	1082
839	-1283	951	819	635	-888	-1015	-892	1077	-866	839	-1019	-1019	-1117	703	-1072
840	-1282	952	808	636	-887	-1014	-1137	1078	-865	840	-1018	-1018	844	969	-1071
841	-1281	953	-807	-637	-1099	-1013	-1136	1079	-864	841	-1017	-1017	845	970	-1070
842	-1280	954	-806	638	-1034	1113	1139	-724	-863	842	-1016	-1016	846	971	-1069
843	-1279	955	-1112	639	926	741	1140	-714	-862	843	-1015	-1015	847	972	-1068
844	-1278	956	1110	640	927	-742	1141	653	-861	844	-1014	-1014	848	973	-1067
845	-1277	957	1111	641	840	743	694	709	-860	845	-1013	-1013	-968	974	-1066
846	-1276	958	-1109	642	-841	-690	-695	717	-859	846	1113	1113	-967	975	-1065
847	-1275	959	-1108	643	842	-689	885	951	-858	847	741	741	-966	976	-1064
848	-1274	960	-1107	-941	720	-688	886	952	-857	848	-742	-742	-965	977	-1063
849	-1273	961	-1106	-843	-968	-687	887	1062	-856	849	743	743	-964	978	1077
850	-1272	962	-1105	-719	830	-686	888	-652	-855	850	-691	-691	-963	979	1078
851	-1271	963	-1104	-718	831	-685	889	-827	-854	851	-690	-690	-962	980	1079
852	-1270	964	-1103	825	832	-684	890	-689	-853	852	-689	-689	-961	981	-724
853	-1269	965	-1102	-860	-765	767	891	-688	-852	853	-688	-688	-960	982	-723
854	-1268	966	1138	1085	766	768	-700	-687	-851	854	-687	-687	-959	983	-722
855	-1267	967	1139	1086	-683	-829	821	-686	-850	855	-686	-686	-958	984	-721
856	-1266	968	1140	1087	-682	631	-623	-685	-849	856	-685	-685	-957	985	-828
857	-1265	969	1141	897	-851	1127	-1150	-684	-848	857	-684	-684	-956	986	-827
858	868	970	1142	898	-850	1128	-1149	767	-847	858	767	767	-955	987	-826
859	869	971	745	899	-849	1130	-1148	768	-846	859	768	768	-954	988	-825
860	870	972	746	900	704	921	-1147	-829	-845	860	-829	-829	-953	989	-824
861	871	973	747	901	946	922	-798	631	-844	861	631	631	-952	990	-823
862	872	974	748	902	947	1080	797	1127	-843	862	1127	1127	-951	991	1032
863	873	975	749	903	739	-950	-796	1128	-842	863	1128	1128	-717	992	1033
864	874	976	-949	904	742	-949	-795	-996	-841	864	1130	1130	-716	993	1034
865	875	977	-948	905	743	-1042	794	-995	-840	865	921	921	-715	994	1035
866	876	978	-947	906	744	1041	-793	-994	-839	866	922	922	932	995	1036
867	877	979	-946	907	745	764	792	-993	-838	867	923	923	933	996	1037
868	878	980	704	908	1055	-765	-791	-992	-837	868	924	924	934	997	1038
869	879	981	849	909	1133	766	785	-991	-836	869	925	925	935	998	661
870	880	982	850	910	-627	-683	786	-990	-835	870	926	926	936	999	662
871	881	983	851	-1150	-626	-682	787	-989	-834	871	927	927	770	1000	663
872	882	984	682	-1149	-727	-851	788	-988	-833	872	928	928	771	1001	664
873	883	985	-710	1105	726	-850	-809	-987	-832	873	-752	-752	-710	1002	-665
874	884	986	-709	976	-725	-680	820	-986	-831	874	824	824	-709	1003	666
875	885	987	-708	-1140	1080	681	-1133	-985	-830	875	825	825	-708	1004	667
876	886	988	-773	-868	1081	852	-1132	-1097	-829	876	826	826	-707	1005	668
877	887	989	-772	811	1082	853	776	-1096	-828	877	827	827	-706	1006	669
878	888	990	-771	812	-1072	-758	777	982	-827	878	828	828	-705	1007	1117
879	889	991	-770	813	859	755	778	-970	-826	879	721	721	-945	1008	1118
880	890	992	-769	814	631	756	-779	-969	-825	880	722	722	-944	1009	1119
881	891	-769	-768	815	632	744	780	-703	-824	881	723	723	-943	1010	1120
882	892	-768	-767	816	-764	745	781	-702	-823	882	811	811	-942	1011	1121
883	893	-767	-766	817	-763	1055	-1134	-701	-822	883	812	812	-941	1012	1122
884	894	-766	866	818	1048	-1082	-699	-1091	-821	884	813	813	-843	-1112	1123
885	895	-765	867	819	-1049	-1081	-698	-1090	-820	885	814	814	-719	1110	1124
886	896	-764	868	808	1050	725	-697	-910	-819	886	815	815	-718	1111	1125
887	897	-763	869	-807	-1051	726	-900	-909	-818	887	816	816	-950	-1109	1126
888	898	-762	870	-806	1052	727	-899	-908	-817	888	817	817	-949	-1108	1056
889	899	-761	871	-805	1111	626	-898	898	-816	889	818	818	-948	-1107	1057
890	900	-760	872	-884	-1109	627	908	899	-815	890	819	819	-947	-1106	1058
891	901	-759	873	-883	-899	628	909	900	-814	891	808	808	-946	-1105	1059
892	902	-758	874	-882	904	629	910	697	-813	892	-807	-807	-704	-1104	1060
893	903	-757	875	-881	719	630	1090	698	-812	893	-806	-806	849	-1103	1061
894	904	-756	876	-880	854	-720	1091	699	-811	894	896	896	850	-1102	1062
895	905	-755	877	-879	-856	-842	701	1134	-810	895	897	897	851	-1101	-1076
896	906	-754	878	-878	-1093	841	702	-781	-809	896	-907	-907	682	-1100	-1075
897	907	-753	879	-877	1094	-840	703	-780	-808	897	-906	-906	683	-1099	-1131
898	908	-752	880	-876	1095	-763	969	779	-807	898	-905	-905	684	-1098	-1130
899	909	-751	881	-875	-986	-762	970	-778	-806	899	-904	-904	685	-1097	1129
900	910	843	882	-874	-985	660	971	-777	-805	900	-799	-799	686	-1096	-1128
901	911	844	883	-1101	-1097	747	972	-776	-804	901	1146	1146	687	-1095	-1127
902	912	845	884	803	628	672	973	1132	-803	902	-1145	-1145	688	-656	-1055
903	913	846	805	804	1075	673	974	1133	-802	903	-1144	-1144	689	-655	-745
904	914	847	-1012	885	1076	674	770	-820	-801	904	-1143	-1143	690	-654	-744
905	915	848	703	886	-1062	1075	771	809	-800	905	-1142	-1142	691	-653	-743
906	-789	849	969	887	-1061	1076	-710	-788	-799	906	-878	-878	692	-652	-742
907	-788	850	-1137	888	-1060	-1062	-873	-787	-798	907	-877	-877	-1021	-651	-741
908	-997	851	-1136	889	1059	-952	-872	-786	-797	908	876	876	-1020	-650	-740
909	-996	852	-1135	890	-1058	-951	-871	-785	-796	909	-875	-875	-1019	-649	-739
910	-995	853	-1134	891	1042	-717	-870	791	-795	910	-874	-874	-1018	731	-738
911	-994	854	-1133	1104	1043	-716	-869	-792	-794	911	-709	-709	-1017	732	-737
912	-993	855	-1132	-1148	1044	-715	-868	793	-793	912	-653	-653	-1016	733	-736
913	-992	856	776	-1147	1045	932	-867	-794	-792	913	714	714	-1015	734	-735
914	-991	857	777	-798	1046	933	-895	795	-791	914	937	937	-1014	735	-734
915	-990	858	778	797	1047	1033	894	796	-790	915	-938	-938	-1013	736	-733
916	-989	859	-779	-796	692	1034	1002	-797	916	916	939	939	1113	737	-732
917	-988	860	780	-795	-1021	1035	-1001	798	917	917	940	940	1114	738	-731
918	-987	861	781	-794	-1020	-670	-1031	1147	918	918	-769	-769	1115	739	649
919	-986	862	782	-793	-1019	761	-1030	1148	919	919	1039	1039	1116	740	650
920	-985	863	783	792	1018	-659	-822	1149	920	920	1040	1040	920	741	651
921	-984	864	784	-791	-1017	-658	1098	1150	921	921	-839	-839	921	742	652
922	-983	865	785	-790	1016	-657	1099	931	922	922	-838	-838	922	743	653
923	-982	866	786	-789	-1015	-656	1100	-930	923	923	-837	-837	923	744	709
924	-981	867	787	-788	1014	655	893	934	924	924	965	965	924	745	710
925	-980	868	788	-787	-1013	-654	984	935	925	925	966	966	925	746	-771
926	-979	869	-995	786	1113	-708	-705	-710	926	926	967	967	926	747	-770
927	-978	870	-994	-785	1114	-707	944	-873	927	927	968	968	927	748	-936
928	-977	871	-993	-784	1115	-706	945	-872	928	928	706	706	928	749	-935
929	-976	872	-992	-783	-1116	-968	-943	-871	929	929	707	707	929	750	-934
930	-975	873	-991	-782	-712	-967	-942	-870	930	930	708	708	930	751	930
931	-974	874	-990	-781	997	966	-941	-869	931	931	654	654	931	752	931
932	-973	875	-989	-780	998	-965	-843	-868	932	932	-655	-655	-919	753	919
933	-972	876	-988	928	-999	837	878	-867	933	933	656	656	-918	-757	-918
934	-971	877	-987	929	1000	838	1142	-895	934	934	657	657	-917	-756	-917
935	-970	878	-986	-1090	-1029	839	1143	1139	935	935	658	658	-916	-755	-913
936	-969	879	-970	-1089	1028	-1040	1144	1140	936	936	659	659	911	-754	-912
937	-968	880	-1101	-1088	-1027	-1039	1145	1141	937	937	-761	-761	912	758	-914
938	-967	881	-1100	-896	-807	769	-1146	-810	938	938	670	670	913	759	916
939	-966	882	-1099	-895	906	-940	799	789	939	939	-1035	-1035	914	760	911
940	-965	883	-1098	-894	907	-939	904	790	940	940	-1034	-1034	915	761	915
941	-964	884	-1097	-893	819	938	905	-784	941	941	-1033	-1033	-1141	762	-1141
942	-963	885	-1096	-892	808	-937	906	783	942	942	-933	-933	-1140	763	-1140
943	-962	886	932	1103	1031	-714	907	-782	943	943	-932	-932	-1139	764	-1139
944	-961	887	933	-1102	1001	653	-897	1135	944	944	715	715	-1012	-765	-1012
945	-960	888	934	-873	1002	709	-896	-1012	945	945	716	716	-1011	766	-1011
946	-959	889	-968	-872	1003	874	806	-1011	946	946	717	717	-1010	767	-1010
947	-958	890	-967	-871	-1004	875	807	-1010	947	947	951	951	-1009	768	-1009
948	-957	891	-966	-870	1005	-876	818	-1009	948	948	952	952	-1008	769	-1008
949	-956	892	-965	-869	1007	877	819	-1008	949	949	1062	1062	-1007	770	-1007
950	-955	893	-964	1142	1006	878	808	-1007	950	950	-1076	-1076	-1006	771	-1006
951	-954	894	-963	1143	1008	1142	-817	-1006	951	951	-1075	-1075	-1005	772	-1005
952	-953	895	-962	-1144	-1009	1143	-816	-1005	952	952	-674	-674	-1004	773	-1004
953	-952	896	-961	1145	1010	1144	-815	-1004	953	953	-673	-673	-1003	774	-1003
954	-951	897	-960	-1146	1011	1145	-814	1003	954	954	-672	-672	-1002	775	-1002
955	-950	898	-959	799	1012	-1146	-813	-1089	955	955	-747	-747	-1001	-1131	-1001
956	-949	899	-958	800	1139	799	-812	-1088	956	956	-660	-660	-1031	-1130	-1031
957	-948	900	-957	801	1140	-861	-811	-1087	957	957	762	762	-1030	-1129	-1030
958	-947	901	-956	802	1141	-860	-723	1085	958	958	763	763	-822	-1128	-822
959	-946	902	-955	-1100	-903	-1086	-722	1086	959	959	764	764	-821	-1127	-821
960	-945	903	-954	-1099	-902	-1085	-721	860	960	960	-765	-765	-820	-1126	700
961	-944	904	-953	-1098	1126	1087	-828	861	961	961	766	766	809	-1125	701
962	-943	905	-952	-984	1056	1088	-827	862	962	962	-683	-683	810	-1124	702
963	-942	906	-951	-983	-762	1089	-826	-1124	963	963	-682	-682	811	-1123	703
964	-941	907	-717	-982	718	-1003	-825	-1123	964	964	-851	-851	812	-1122	969
965	-940	908	-716	-981	-702	1004	-824	-1122	965	965	-850	-850	813	-1121	970
966	-939	909	-715	-980	770	1005	752	-1121	966	966	-680	-680	814	-1120	971
967	-938	910	-885	-979	-848	-1006	-928	-1120	967	967	681	681	815	-1119	972
968	-937	911	-804	-978	860	1007	-927	-1119	968	968	852	852	816	-1118	973
969	-936	912	-803	-977	862	1008	-926	-1118	969	969	853	853	817	-1117	974
970	-935	913	-802	-1012	863	1009	-925	-1117	970	970	-758	-758	818	-1116	975
971	-934	914	-801	-1011	1086	1010	-924	-669	971	971	755	755	819	-1115	976
972	-933	915	759	-1010	1087	1011	-923	-668	972	972	756	756	808	-1114	977
973	-932	-789	760	-1009	1088	1012	-922	-667	973	973	744	744	-807	-1113	978
974	-931	-788	761	-1008	-861	-1135	-921	-666	974	974	745	745	-806	1013	979
975	-930	-787	762	-1007	1089	782	-1130	665	975	975	1055	1055	-805	1014	980
976	-929	-786	763	-1006	869	-783	-1128	-664	976	976	-1082	-1082	-884	1015	981
977	-928	-785	764	1005	870	784	-1127	-663	977	977	-1081	-1081	-883	1016	982
978	-927	-784	-765	-1004	1053	-790	-631	662	978	978	725	725	-882	1017	983
979	-926	-783	907	-952	1054	-789	829	-661	979	979	726	726	-881	1018	1090
980	-925	-782	908	-1003	746	810	-768	-1038	980	980	727	727	-880	1019	1091
981	-924	-781	909	-1002	1057	-780	-767	-1037	981	981	626	626	-879	1020	-805
982	-923	-780	910	-1001	-1085	779	684	-1036	982	982	627	627	-878	1021	-884
983	-922	-779	911	-1031	901	-778	685	-901	983	983	628	628	-877	-692	-883
984	-921	-778	912	-1030	664	-777	686	-696	984	984	629	629	-876	-691	-882
985	-920	-777	913	-822	-665	-776	687	-983	985	985	630	630	-875	-690	-881
986	-919	-776	914	-821	666	1132	688	694	986	986	-720	-720	-874	-689	-880
987	-918	-775	915	-931	667	1133	689	695	987	987	-842	-842	-873	-688	-879
988	-917	-774	916	-930	893	-820	690	885	988	988	841	841	-872	-687	-878
989	-916	-773	917	-919	894	809	691	886	989	989	-840	-840	-871	-686	-877
990	790	-772	918	-918	-810	-788	-743	971	990	990	-1041	-1041	-870	-685	-876
991	791	-771	919	-917	-809	-787	742	972	991	991	1042	1042	-869	-684	-875
992	792	-770	920	-916	820	-786	-741	973	992	992	949	949	-868	-683	-874
993	793	993	921	-911	-1096	-785	-1113	974	993	993	950	950	-867	-682	-873
994	794	994	922	915	987	791	1013	975	994	994	-1080	-1080	-866	-851	-872
995	795	995	923	-820	-988	-792	1014	976	995	995	718	718	-865	-850	-871
996	796	996	924	809	-858	793	1015	977	996	996	719	719	-864	-849	-870
997	797	997	925	810	-857	-794	1016	978	997	997	854	854	-863	704	-869
998	798	998	926	-1141	-1092	795	1017	979	998	998	855	855	-862	946	-868
999	799	999	927	1139	-895	796	1018	980	999	999	856	856	-861	947	-867
1000	800	1000	928	-867	811	-797	1019	981	1000	1000	857	857	-860	948	-866
1001	801	1001	929	-866	-812	798	-1020	-1095	1001	1001	858	858	1085	949	-865
1002	802	1002	930	-865	813	1147	1021	-1094	1002	1002	859	859	1086	950	-864
1003	803	1003	931	-864	-816	1148	-692	-1093	1003	1003	-1084	-1084	1087	718	-863
1004	804	1004	-1095	-863	-815	1149	-1047	-1092	1004	1004	-1083	-1083	1088	719	-862
1005	805	1005	657	-862	814	1150	-1046	-866	1005	1005	1073	1073	1089	843	-861
1006	806	1006	658	-861	817	623	1074	-865	1006	1006	1074	1074	1090	941	-860
1007	807	1007	825	826	818	691	844	-1023	1007	1007	844	844	1091	942	1085
1008	808	1008	826	827	-897	935	845	-1102	1008	1008	845	845	1092	943	1086
1009	809	1009	827	828	-896	936	846	-1101	1009	1009	846	846	1093	944	1087
1010	810	1010	-828	-630	806	983	847	-1100	1010	1010	847	847	1094	945	1088
1011	811	1164	829	-629	-1026	696	848	-1099	1011	1011	848	848	1095	705	1089
1012	812	1165	830	-628	1025	901	1125	-1098	1012	1012	1125	1125	1096	706	984
1013	813	1166	-663	-627	-1024	902	1126	822	1013	1013	1126	1126	1097	707	-910
1014	814	1167	-662	838	-1023	1129	1056	1030	1014	1014	1056	1056	985	708	-909
1015	815	1168	-661	-711	-1022	903	1057	1031	1015	1015	1057	1057	986	709	-908
1016	816	1169	-1038	772	693	1103	1058	1001	1016	1016	1058	1058	987	710	898
1017	817	1170	-1037	773	694	1104	1059	-936	1017	1017	1059	1059	988	711	899
1018	818	1171	-1036	774	-695	1105	1060	-771	1018	1018	1060	1060	989	712	900
1019	819	1172	629	775	696	1106	1061	-770	1019	1019	1061	1061	990	713	901
1020	820	1173	630	-1131	697	802	953	-808	1020	1020	953	953	991	714	902
1021	821	1174	631	-1130	698	803	954	-819	1021	1021	954	954	992	715	903
1022	822	1175	632	1050	924	804	955	-807	1022	1022	955	955	993	716	904
1023	823	1176	633	1051	1033	-911	-1116	-806	1023	1023	-1116	-1116	994	717	905
1024	824	1177	634	959	-1032	-916	-1115	896	1024	1024	-1115	-1115	995	951	906
1025	825	1178	635	960	823	914	-1114	927	1025	1025	-1114	-1114	996	952	907
1026	826	1179	636	961	824	912	-740	928	1026	1026	-740	-740	997	953	-897
1027	827	1180	637	962	825	913	-739	-752	1027	1027	-739	-739	998	954	-896
1028	828	1181	638	963	826	-915	-738	-893	1028	1028	-738	-738	999	955	806
1029	829	1182	639	964	827	917	-737	-892	1029	1029	-737	-737	1000	956	807
1030	830	1183	640	965	828	918	-735	-1137	1030	1030	-735	-735	-1029	957	-808
1031	831	1184	641	966	-1129	-919	-734	-804	1031	1031	-732	-734	-1028	958	-819
1032	832	1185	-1081	967	1130	931	-733	-911	1032	1032	-734	-733	-1027	959	-818
1033	833	1186	-1080	968	1131	-930	-732	-916	1033	1033	-733	-732	-1026	960	-817
1034	834	1187	725	-848	-1037	934	-731	914	1034	1034	-731	-731	-1025	961	-816
1035	835	1188	726	-847	-1036	-821	649	912	1035	1035	649	649	-1024	962	-815
1036	836	1189	727	-714	-1035	700	650	913	-1296	1036	650	650	-1023	963	-814
1037	837	1190	626	-713	-1084	-891	651	-915	-1295	1037	651	651	-1022	964	-813
1038	838	1191	627	-712	-734	-890	652	917	-1294	1038	652	652	693	965	-812
1039	839	1192	628	753	-650	-889	-713	918	-1293	1039	-713	-713	694	966	-811
1040	840	1193	823	-757	-649	888	-712	-919	-1292	1040	-712	-712	-695	967	-810
1041	841	1194	824	-756	731	-887	-711	623	-1291	1041	-711	-711	696	968	-809
1042	842	1195	659	-755	732	-886	772	-821	-1290	1042	772	772	697	-848	820
1043	843	1196	660	-754	733	-885	773	700	-1289	1043	773	773	698	-847	-1133
1044	844	1197	1039	758	651	695	774	-891	-1288	1044	774	774	699	-846	-1132
1045	845	1198	1040	759	-844	-694	775	890	-1287	1045	775	775	700	-845	776
1046	846	1199	1041	760	-1074	-1141	-833	-889	-1286	1046	-833	-833	701	-844	777
1047	847	1200	1127	761	-1073	-1140	-832	-888	-1285	1047	-832	-832	702	-940	778
1048	848	1201	1128	762	1083	-1139	-648	-887	-1284	1048	-648	-648	703	-939	-779
1049	849	1202	1129	763	735	1136	-647	-693	-1283	1049	-647	-647	969	-938	780
1050	850	1203	1130	764	-737	1137	-646	1022	-1282	1050	-646	-646	970	-937	781
1051	851	1204	1131	851	-736	892	-645	800	-1281	1051	-645	-645	971	-936	782
1052	852	1205	-649	682	-741	893	-644	801	-1280	1052	-644	-644	972	-935	783
1053	853	1206	731	683	-740	984	-643	1107	-1279	1053	-643	-643	973	-934	784
1054	854	1207	732	684	738	-805	-642	1108	-1278	1054	-642	-642	974	-933	785
1055	855	1208	733	685	937	-884	-641	1109	-1277	1055	-641	-641	975	-932	786
1056	856	1209	734	686	938	-883	-640	-1111	-1276	1056	-640	-640	976	-931	787
1057	857	1210	735	687	939	-882	-639	-1110	-1275	1057	-639	-639	977	-930	788
1058	858	1211	736	688	-652	-881	-638	1112	-1274	1058	-638	-638	978	-929	789
1059	859	1212	737	689	845	880	637	-1138	-1273	1059	637	637	979	-928	790
1060	860	1213	738	690	-829	-879	-636	879	-1272	1060	-636	-636	980	-927	791
1061	861	1214	739	691	1100	1138	-635	-880	-1271	1061	-635	-635	981	-926	-792
1062	862	1215	740	692	1071	-1112	-634	881	-1270	1062	-634	-634	982	-925	793
1063	863	1216	741	-1021	989	1110	-633	-750	-1269	1063	-633	-633	983	-924	794
1064	864	1217	742	-1020	-1091	1111	-632	-749	-1268	1064	-632	-632	984	-923	795
1065	865	1218	743	-1019	639	-1109	-1072	-748	-1267	1065	-1072	-1072	1098	-922	796
1066	866	1219	744	-1018	634	-1108	-675	-671	-1266	1066	-1071	-1071	1099	-921	-797
1067	867	1220	1143	-1017	833	-1107	-760	1131	-1265	1067	-1070	-1070	1100	-920	798
1068	-1264	1221	-1144	-1016	834	-801	-736	834	-1264	1068	-1069	-1069	1101	-919	1147
1069	-1263	1222	1145	-1015	-835	-800	-759	835	-1263	1069	-1068	-1068	1102	-918	1148
1070	-1262	1223	-1146	-1014	836	-1022	-877	836	-1262	1070	-1067	-1067	1103	-917	1149
1071	-1261	1224	799	-1013	-635	693	876	-964	-1261	1071	-1066	-1066	1104	-916	1150
1072	-1260	1225	800	1113	633	781	-875	-963	-1260	1072	1065	1065	1105	-915	1098
1073	-1259	1226	-758	1114	-645	-1134	-874	-962	-1259	1073	-1064	-1064	1106	-914	1099
1074	-1258	1227	754	1115	643	-699	-709	-732	-1258	1074	-1063	-1063	1107	-913	1100
1075	-1257	1228	755	1116	644	-698	-653	-734	-1257	1075	1077	1077	1108	-912	1101
1076	-1256	1229	756	920	-642	-697	714	-733	-1256	1076	1078	1078	1109	-911	1102
1077	-1255	1230	757	921	-641	-900	937	-731	-1255	1077	1079	1079	-1111	-910	1103
1078	-1254	1231	-753	922	-963	-899	-938	649	-1254	1078	-724	-724	-1110	-909	1104
1079	-1253	1232	-752	923	964	-898	939	650	-1253	1079	-893	-893	1112	-908	1105
1080	-1252	1233	-751	924	646	908	940	651	-1252	1080	-892	-892	-1138	-907	1106
1081	-1251	1234	-750	925	647	909	-769	828	-1251	1081	-1137	-1137	-1137	-906	802
1082	-1250	1235	950	926	648	910	1039	721	-1250	1082	-1136	-1136	-1136	-905	803
1083	-1249	1236	718	927	-730	1090	1040	722	-1249	1083	1139	1139	-1135	-904	804
1084	-1248	1237	719	779	-729	1091	-839	723	-1248	1084	1140	1140	-1134	-903	885
1085	-1247	1238	843	-778	-728	701	-838	811	-1247	1085	1141	1141	-1133	-902	886
1086	-1246	1239	941	-777	-625	702	-837	812	-1246	1086	-810	-810	-1132	-901	887
1087	-1245	1240	942	-776	-624	703	965	813	-1245	1087	789	789	776	-900	888
1088	-1244	1241	943	1132	-623	969	-966	814	-1244	1088	790	790	777	-899	889
1089	-1243	1242	-983	1133	622	970	967	815	-1243	1089	-784	-784	778	-898	890
1090	-1242	1243	-982	1134	-761	971	968	824	-1242	1090	783	783	-779	-897	891
1091	-1241	1244	-981	-1135	-760	972	-1131	825	-1241	1091	-782	-782	780	-896	892
1092	-1240	1245	-980	1136	-755	973	671	826	-1240	1092	1135	1135	781	-895	893
1093	-1239	1246	-979	1137	-754	974	748	690	-1239	1093	-1012	-1012	782	-894	894
1094	-1238	1247	-978	1138	758	975	749	691	-1238	1094	-1011	-1011	783	-893	895
1095	-1237	1248	-977	-1112	759	976	750	-743	-1237	1095	-1010	-1010	784	-892	1092
1096	-1236	1249	-976	1110	749	977	724	742	-1236	1096	-1009	-1009	785	-891	1093
1097	-1235	1250	-975	1111	750	978	-1079	-741	-1235	1097	-1008	-1008	786	-890	1094
1098	-1234	1251	-974	-1109	751	979	-1078	-1113	-1234	1098	-1007	-1007	787	-889	1095
1099	-1233	1252	-973	-1108	752	980	-1077	1013	-1233	1099	-1006	-1006	788	-888	1096
1100	-1232	1253	-972	-1107	753	981	1063	1014	-1232	1100	-1005	-1005	789	-887	1097
1101	-1231	1254	-971	-1106	-757	-1095	1064	1015	-1231	1101	-1004	-1004	790	-886	985
1102	-1230	1255	-985	-975	-756	-1094	-1065	1016	-1230	1102	1003	1003	791	-885	986
1103	-1229	1256	-984	-974	748	-1093	1066	1017	-1229	1103	-1089	-1089	-792	-804	987
1104	-1228	1257	-1032	-973	-747	-1092	-936	1018	-1228	1104	-1088	-1088	793	-803	988
1105	-1227	1258	835	-972	-691	-866	-935	1019	-1227	1105	-1087	-1087	794	-802	989
1106	-1226	1259	836	-971	-690	-865	-934	1020	-1226	1106	1085	1085	795	-801	990
1107	-1225	1260	837	-970	-689	-1023	930	1021	-1225	1107	1086	1086	796	-800	991
1108	-1224	1261	838	-969	688	-1102	-931	-692	-1224	1108	860	860	-797	-799	992
1109	-1223	1262	839	-703	-687	-1101	919	-1047	-1223	1109	861	861	798	1146	993
1110	-1222	1263	840	-702	686	-1100	-918	-1046	-1222	1110	862	862	1147	-1145	994
1111	-1221	1264	841	-701	-685	-1099	-917	-1045	-1221	1111	863	863	1148	1144	995
1112	-1220	1265	842	-700	-767	-1098	915	1044	-1220	1112	864	864	1149	-1143	996
1113	-1219	1266	-903	699	-684	822	-913	-1043	-1219	1113	1024	1024	1150	-1142	997
1114	-1218	1267	-902	-698	768	1030	-912	-948	-1218	1114	1025	1025	-910	-1141	998
1115	-1217	1268	-901	-697	769	1031	-914	-947	-1217	1115	1026	1026	-909	-1140	999
1116	-1216	1269	-900	-696	-940	1001	916	-946	-1216	1116	1027	1027	-908	-1139	1000
1117	-1215	1270	-899	695	984	-1002	911	-704	-1215	1117	1028	1028	-907	-1138	-1029
1118	-1214	1271	-898	-694	-805	-894	-804	849	-1214	1118	1029	1029	-906	-1137	-1028
1119	-1213	1272	-897	-693	-884	895	-803	-679	-1213	1119	-1000	-1000	-905	-1136	-1027
1120	-1212	1273	-896	1022	883	867	-802	-678	-1212	1120	-999	-999	-904	-1135	-1026
1121	-1211	1274	-895	1023	-882	868	-1106	-677	-1211	1121	-998	-998	-903	-1134	-1025
1122	-1210	1275	-894	1024	-881	869	-1105	-676	-1210	1122	-997	-997	-902	-1133	-1024
1123	-1209	1276	-893	1025	-880	862	-1104	-675	-1209	1123	-996	-996	-901	-1132	-1023
1124	-1208	1277	-892	1026	-879	863	-1103	-760	-1208	1124	-995	-995	-900	776	-1022
1125	-1207	1278	-891	1027	-878	864	-903	-736	-1207	1125	-994	-994	-899	777	693
1126	-1206	1279	-890	1028	-877	1024	-1129	-759	-1206	1126	-993	-993	-898	778	694
1127	-1205	1280	-889	1029	875	1025	-902	843	-1205	1127	-992	-992	-897	-779	-695
1128	-1204	1281	-888	-1000	876	1026	-901	941	-1204	1128	-991	-991	-896	780	696
1129	-1203	1282	-887	-999	-874	1027	-696	942	-1203	1129	-990	-990	-895	781	697
1130	-1202	1283	-886	-998	-873	1028	-983	943	-1202	1130	-989	-989	-894	782	698
1131	-1201	1284	-714	-997	-1110	1029	-982	-945	-1201	1131	-988	-988	-893	783	699
1132	-1200	1285	-713	-996	872	-1000	1096	-944	-1200	1132	-987	-987	-892	784	1134
1133	-1199	1286	-712	-995	871	-999	1097	705	-1199	1133	-986	-986	-891	785	1135
1134	-1198	1287	-711	994	1112	-998	985	902	-1198	1134	-985	-985	-890	786	1136
1135	-1197	1288	683	-993	-1138	-997	986	1129	-1197	1135	-1097	-1097	-889	787	1137
1136	-1196	1289	684	-992	-1137	-996	987	903	-1196	1136	-1096	-1096	-888	788	1138
1137	-1195	1290	685	-991	-1136	-995	988	1103	-1195	1137	982	982	-887	789	-1112
1138	-1194	1291	686	-990	-1135	-994	989	1104	-1194	1138	983	983	-886	790	1110
1139	-1193	1292	687	-989	-1134	-993	990	1105	-1193	1139	696	696	-885	791	1111
1140	-1192	1293	688	-988	-699	-992	667	1106	-1192	1140	901	901	-804	-792	-1109
1141	-1191	1294	689	-987	-1108	-991	668	802	-1191	1141	902	902	-803	793	-1108
1142	-1190	1295	690	-986	-1107	-990	669	803	-1190	1142	1129	1129	-802	794	-1107
1143	-1189	1296	691	-985	-801	-989	1117	-1002	-1189	1143	903	903	-801	795	-801
1144	-1188	-1035	692	-1097	-800	-988	1118	-894	-1188	1144	1103	1103	-800	796	-800
1145	-1187	-1034	-1021	-1096	-799	-987	1119	1136	-1187	1145	1104	1104	-799	797	-799
1146	-1186	-1033	-1020	-1095	1146	-986	1120	882	-1186	-1146	1105	1105	1146	798	1146
1147	-1185	-1032	-1019	-1094	-1145	-985	1121	883	-1185	1147	1106	1106	-1145	1147	-1145
1148	-1184	-1031	1148	-1093	1144	-1097	1122	884	-1184	1148	802	802	1144	1148	1144
1149	-1183	-1030	1149	-1092	-1143	-1096	1123	805	-1183	1149	803	803	-1143	1149	-1143
1150	-1182	-1029	-1150	-1091	-1142	982	1124	-984	-1182	1150	804	804	-1142	1150	-1142
B-cent	-1181	-1028	B-cent	B-cent	B-cent	B-cent	B-cent	B-cent	-1181	B-cent	B-cent	B-cent	B-cent	B-cent	B-cent
C-cent	-1180	-1027	C-cent	C-cent	C-cent	C-cent	C-cent	C-cent	-1180	C-cent	C-cent	C-cent	C-cent	C-cent	C-cent
1151	-1179	-1026	-1151	1151	1316	1249	-1496	1546	-1179	1151	-1496	-1496	1151	1151	-1151
1152	-1178	-1025	1152	-1709	-1315	1521	-1495	1337	-1178	1152	-1495	-1495	1152	1152	1152
1153	-1177	-1024	-1153	-1708	1457	-1532	1630	1338	-1177	1153	1630	1630	-1441	-1153	-1441
1154	-1176	-1023	1154	-1707	1458	-1276	1382	1230	-1176	1154	1382	1382	-1440	1154	-1440
1155	-1175	-1022	1155	-1706	-1171	1283	1383	-1543	-1175	1155	1383	1383	-1439	1155	-1439
1156	-1174	-1021	1156	-1705	1353	-1443	-1384	-1560	-1174	1156	-1384	-1384	-1438	1156	-1438
1157	-1173	-1020	1157	-1704	1355	-1442	1385	-1559	-1173	1157	1385	1385	-1230	1157	1155
1158	-1172	-1019	1158	1358	1356	-1153	1341	-1558	-1172	1158	1341	1341	-1338	1158	1156
1159	-1171	-1018	1159	1359	-1216	1154	-1755	1678	-1171	1159	1561	1561	-1337	1159	1328
1160	-1170	-1017	1160	1360	-1215	1544	-1754	1408	-1170	1160	1562	1562	-1546	1160	1329
1161	-1169	-1016	1161	1337	-1214	1545	-1753	1409	-1169	1161	1563	1563	-1545	1161	-1532
1162	-1168	-1015	1162	-1338	1213	1546	-1684	1410	-1168	1162	1564	1564	-1544	1162	-1531
1163	-1167	-1014	1163	1230	-1703	1337	-1683	1597	-1167	1163	1237	1237	-1543	1163	-1530
1164	-1166	-1013	1164	1438	-1702	1338	1450	1598	-1166	1164	1238	1238	-1542	1164	-1529
1165	-1165	-1012	1165	1439	-1701	1663	1451	-1473	-1165	1165	1239	1239	-1541	1165	-1528
1166	-1164	-1011	1166	-1245	-1694	-1611	1512	1472	-1164	1166	1240	1240	-1540	1166	-1527
1167	-1163	-1163	1167	-1379	1696	1559	1513	-1471	-1163	1167	1241	1241	1292	1167	-1289
1168	-1162	-1162	1168	-1378	1697	1560	1514	-1470	-1162	1168	1242	1242	1293	1168	-1288
1169	-1161	-1161	1169	-1377	1698	1543	1158	-1469	-1161	1169	1243	1243	1294	1169	1619
1170	-1160	-1160	1170	-1376	1699	-1230	1159	1672	-1160	1170	1632	1632	1295	1170	1620
1171	-1159	-1159	1171	-1771	1218	-1662	1160	1673	-1159	1171	-1381	-1381	1296	1171	1621
1172	-1158	-1158	1172	1770	1219	-1660	1161	1674	-1158	1172	-1380	-1380	1297	1172	1622
1173	-1157	-1157	1173	1586	-1752	-1659	1162	1675	-1157	1173	-1631	-1631	1298	1173	1623
1174	-1156	-1156	1174	1171	1208	-1658	1163	1676	-1156	1174	-1400	-1400	1299	1174	-1481
1175	-1155	-1155	-1272	1172	1291	-1679	1164	1677	-1155	1175	-1399	-1399	1300	1175	-1480
1176	-1154	-1154	-1306	1173	-1444	-1407	1165	-1557	-1154	1176	-1398	-1398	1301	1176	-1479
1177	-1153	-1153	-1305	1174	-1443	1194	-1323	-1556	-1153	1177	-1397	-1397	1302	1177	-1478
1178	-1152	-1152	-1304	1175	-1442	-1289	-1166	1406	-1152	1178	1785	1785	1303	1178	-1477
1179	-1151	-1151	-1303	1176	-1153	-1288	1324	-1193	-1151	1179	-1786	-1786	1304	1179	-1476
1180	C-cent	C-cent	-1302	1177	1154	1619	1326	-1192	C-cent	1180	1787	1787	1305	-1180	-1475
1181	B-cent	B-cent	-1301	1178	-1230	1621	-1327	-1191	B-cent	1181	1244	1244	1306	1181	1361
1182	1150	-1150	-1300	1179	-1338	1622	-1709	-1190	-1150	1182	-1788	-1788	1272	1182	1362
1183	-1149	-1149	-1299	-1180	-1337	1623	-1708	-1459	-1149	1183	-1784	-1784	1273	1183	-1313
1184	-1148	-1148	-1298	1181	-1546	-1481	-1707	-1458	-1148	1184	1524	1524	1460	1184	-1312
1185	-1147	-1147	-1297	1182	-1545	-1480	-1706	-1457	-1147	1185	-1491	-1491	1274	1185	-1311
1186	1146	1146	-1296	1183	-1544	-1479	1452	-1456	1146	1186	-1490	-1490	1275	1186	-1310
1187	1145	1145	-1295	1185	-1543	-1478	1453	-1455	1145	1187	1358	1358	1461	1187	-1309
1188	-1144	1144	-1294	1186	-1542	-1477	1268	-1454	-1144	1188	1359	1359	1462	1188	-1308
1189	-1143	-1143	1555	-1571	1250	-1620	1269	1780	-1143	1189	1360	1360	1463	-1375	-1352
1190	-1142	-1142	1556	1710	1251	-1697	1270	1781	-1142	1190	-1488	-1488	1464	-1374	-1351
1191	-1141	-1141	1557	1711	-1609	1696	1271	1782	-1141	1191	-1487	-1487	1465	-1373	1363
1192	-1140	-1140	1558	1712	-1608	1694	-1307	1783	-1140	1192	-1486	-1486	1466	1552	1258
1193	-1139	-1139	1559	1713	1521	1701	-1493	-1355	-1139	1193	-1485	-1485	1597	-1617	1259
1194	-1138	-1138	1560	1714	1522	1693	-1498	-1354	-1138	1194	-1484	-1484	1598	-1616	1260
1195	-1137	-1137	1280	1715	1523	-1695	-1497	-1353	-1137	1195	1565	1565	1599	-1615	1276
1196	-1136	-1136	-1256	1716	-1254	-1700	-1290	-1528	-1136	1196	1566	1566	1600	-1614	1277
1197	-1135	-1135	1443	1717	-1253	-1656	-1396	-1527	-1135	1197	-1655	-1655	1601	-1613	-1287
1198	-1134	-1134	1444	1718	-1252	-1346	-1395	1252	-1134	1198	-1654	-1654	1602	-1612	-1286
1199	-1133	-1133	-1291	1719	1610	1567	1492	-1177	-1133	1199	1685	1685	1603	-1611	-1285
1200	-1132	-1132	-1290	1720	1611	1344	-1394	-1176	-1132	1200	1686	1686	1604	-1610	-1284
1201	-1131	-1131	-1396	1721	1612	1345	-1393	-1257	-1131	1201	1687	1687	1605	-1609	-1283
1202	-1130	-1130	-1395	1722	-1613	1347	-1392	-1256	-1130	1202	1688	1688	1606	-1608	-1282
1203	-1129	-1129	-1394	1723	1614	-1357	-1391	-1255	-1129	1203	1689	1689	1255	-1607	1281
1204	-1128	-1128	-1393	1724	-1303	-1356	1547	-1606	-1128	1204	1690	1690	1256	-1606	-1280
1205	-1127	-1314	-1392	1725	-1413	-1483	-1446	-1605	-1127	1205	1691	1691	1257	-1605	-1560
1206	-1126	-1313	-1391	-1726	-1412	-1482	-1373	-1604	-1126	1206	1692	1692	1364	-1604	-1559
1207	-1125	-1312	-1390	1346	-1344	1624	1157	-1603	-1125	1207	1629	1629	1365	-1603	-1558
1208	-1124	-1311	-1389	1347	1217	1625	-1569	-1602	-1124	1208	-1494	-1494	1366	-1602	-1557
1209	-1123	-1310	-1388	-1357	1700	1626	-1568	-1601	-1123	1209	-1586	-1586	1367	-1601	-1556
1210	-1122	-1309	-1387	-1232	1695	1627	-1343	-1600	-1122	1210	-1585	-1585	1368	-1600	-1555
1211	-1121	-1308	-1386	1779	-1693	1402	-1342	-1599	-1121	1211	-1584	-1584	1369	-1599	-1554
1212	-1120	-1307	-1385	1780	-1628	1325	-1399	1474	-1120	1212	-1583	-1583	1370	-1598	-1553
1213	-1119	-1306	-1384	1781	-1424	1403	-1398	1779	-1119	1213	-1582	-1582	1371	-1597	1618
1214	-1118	-1305	-1383	1782	-1509	1404	-1397	-1314	-1118	1214	-1581	-1581	1372	-1466	1278
1215	-1117	-1304	-1382	1783	-1508	1405	1785	-1350	-1117	1215	-1580	-1580	-1205	-1465	1279
1216	-1116	-1303	-1381	-1483	-1507	1406	-1786	-1349	-1116	1216	-1579	-1579	-1204	-1464	1773
1217	-1115	-1302	-1380	-1482	-1506	-1193	1787	-1348	-1115	1217	1578	1578	-1203	-1463	1774
1218	-1114	-1301	-1379	1220	1354	-1192	1244	1265	-1114	1218	-1577	-1577	-1202	-1462	1775
1219	-1113	-1300	-1378	1221	1396	-1191	-1788	1266	-1113	1219	-1576	-1576	-1201	-1461	1776
1220	-1112	-1299	-1377	1222	-1505	-1190	-1784	1267	-1112	1220	-1575	-1575	-1200	-1275	1777
1221	-1111	-1298	-1376	1223	-1527	-1459	1524	1551	-1111	1221	-1574	-1574	-1199	-1274	1778
1222	-1110	-1297	1189	1224	-1602	-1458	-1491	1311	-1110	1222	-1573	-1573	-1198	-1460	1489
1223	-1109	1036	1190	1225	1603	-1457	-1490	1312	-1109	1223	1462	1462	-1197	-1273	-1182
1224	-1108	-1060	1191	1226	-1604	-1456	1358	1313	-1108	1224	1463	1463	-1196	-1272	-1181
1225	-1107	-1059	1192	1227	1605	-1455	1359	-1362	-1107	1225	1464	1464	-1195	-1306	1180
1226	-1106	-1058	-1222	1228	1606	-1454	1360	-1361	-1106	1226	1465	1465	-1194	-1305	-1179
1227	-1105	-1057	-1221	1229	1255	1780	-1488	1475	-1105	1227	1466	1466	-1193	-1304	-1178
1228	-1104	-1056	-1220	1582	1256	1781	-1487	1476	-1104	1228	1411	1411	-1192	-1303	-1177
1229	-1103	-1055	-1219	1684	-1705	1782	-1486	-1286	-1103	1229	1412	1412	-1191	-1302	-1176
1230	-1102	-1054	-1218	1557	1257	1783	-1485	-1285	-1102	1230	1413	1413	-1190	-1301	-1175
1231	-1101	-1053	-1217	1558	1364	-1355	-1484	-1284	-1101	1231	1414	1414	-1189	-1300	-1174
1232	-1100	-1052	-1216	1559	-1175	-1354	1565	1444	-1100	1232	-1633	-1633	1376	-1299	-1173
1233	-1099	-1051	-1215	1372	-1174	-1353	1566	-1291	-1099	1233	1401	1401	1377	-1298	-1172
1234	-1098	-1050	-1214	-1205	-1173	-1528	-1655	1752	-1098	1234	1425	1425	1378	-1297	-1171
1235	-1097	-1049	-1213	-1204	-1172	-1527	-1654	-1219	-1097	1235	1426	1426	1379	-1296	1353
1236	-1096	-1048	-1212	-1203	1666	1211	1685	-1218	-1096	1236	1339	1339	1244	-1295	1354
1237	-1095	-1047	-1211	1398	1667	1210	1686	-1217	-1095	1237	1340	1340	-1788	-1294	1355
1238	-1094	-1046	-1210	1399	-1464	1448	1687	-1216	-1094	1238	1342	1342	-1784	-1293	1356
1239	-1093	-1045	-1209	1400	-1463	1449	1688	-1215	-1093	1239	1343	1343	-1564	-1292	1357
1240	-1092	-1044	-1208	1401	1341	-1682	1689	-1214	-1092	1240	1568	1568	-1563	1540	-1347
1241	-1091	-1043	-1207	1425	-1342	-1681	1690	-1213	-1091	1241	1569	1569	1785	1541	-1346
1242	-1090	-1042	-1206	-1570	1343	-1300	1691	-1212	-1090	1242	-1157	-1157	1786	1542	-1345
1243	-1089	-1041	-1205	-1569	1568	-1299	1692	1763	-1089	1243	1373	1373	1787	1543	-1344
1244	-1088	-1040	-1766	-1568	1399	-1298	1629	1764	-1088	1244	1374	1374	1245	1544	-1567
1245	-1087	-1039	-1765	-1343	1401	-1297	-1494	1765	-1087	1245	1446	1375	1246	1545	1656
1246	-1086	-1038	-1764	1342	1425	-1296	-1586	1766	-1086	1246	-1547	-1187	1247	1546	1657
1247	-1085	-1037	-1763	-1341	1426	-1295	-1585	1767	-1085	1247	1391	-1186	1248	1547	1658
1248	-1084	1061	-1762	-1340	1339	-1294	-1584	-1202	-1084	1248	1392	-1185	1249	1548	1659
1249	-1083	1062	-1761	-1339	-1321	-1293	-1583	-1201	-1083	1249	1393	-1184	1250	1549	1660
1250	-1082	1063	-1760	-1632	-1349	-1292	-1582	-1200	-1082	1250	1394	-1183	1251	1550	1661
1251	-1081	1064	-1759	-1631	1350	1540	-1581	-1199	-1081	1251	-1492	1704	1252	1551	1662
1252	-1080	1065	-1758	-1630	1314	1541	-1580	-1198	-1080	1252	1395	1705	1253	-1372	1663
1253	-1079	1066	-1757	-1629	1454	-1365	-1579	-1197	-1079	1253	1396	1423	1254	-1371	1664
1254	-1078	1067	-1756	-1692	-1242	-1364	1578	-1196	-1078	1254	1290	1510	1607	-1370	1665
1255	-1077	1068	-1755	-1691	1704	-1175	-1577	-1195	-1077	1255	1497	1511	1608	-1369	1666
1256	-1076	1069	-1481	-1690	1706	-1174	-1576	-1260	-1076	1256	1498	1519	1609	-1368	1667
1257	-1075	1070	-1480	-1689	1754	1173	-1575	-1259	-1075	1257	1493	-1641	1610	-1367	1668
1258	-1074	1071	-1479	-1688	1755	-1172	-1609	-1618	-1074	1258	1307	-1640	1611	-1366	1669
1259	-1073	1072	-1478	-1687	1453	-1171	-1608	1553	-1073	1259	-1271	-1639	1612	-1365	1670
1260	-1072	1073	-1477	-1686	-1452	1529	-1607	1554	-1072	1260	-1270	-1638	1613	-1364	1671
1261	-1071	1074	-1476	-1685	-1570	1530	1366	1555	-1071	1261	-1269	-1637	1614	-1363	1445
1262	-1070	1075	-1475	-1556	-1569	1531	1315	-1405	-1070	1262	-1268	-1636	1615	-1362	-1772
1263	-1069	1076	-1474	-1555	-1398	1277	1316	-1404	-1069	1263	-1453	-1635	1616	-1361	-1771
1264	-1068	1077	-1473	-1554	-1397	-1287	1317	-1403	-1068	1264	-1452	-1634	1617	-1360	-1770
1265	-1067	1078	-1472	-1553	1205	-1286	1318	-1325	-1067	1265	1706	1415	-1552	-1359	-1769
1266	-1066	1079	-1471	1618	1370	-1285	1319	-1402	-1066	1266	1707	1416	1373	-1358	-1768
1267	-1065	1080	-1470	1619	-1319	-1284	1320	-1627	-1065	1267	1708	-1417	1374	-1357	1203
1268	-1064	1081	-1469	1620	1528	1444	1321	-1626	-1064	1268	1709	1418	1375	-1356	1204
1269	-1063	1082	1672	1621	1529	-1291	1502	-1625	-1063	1269	-1327	1419	-1188	-1355	1205
1270	-1062	1083	-1691	1622	1530	1752	1503	-1591	-1062	1270	-1326	-1437	-1187	-1354	-1372
1271	-1061	1084	1457	-1481	1531	-1219	1504	-1590	-1061	1271	-1324	-1436	-1186	-1353	-1371
1272	-1060	1085	1458	-1480	1532	-1218	1505	-1589	-1060	1272	1166	-1435	-1185	1307	-1370
1273	-1059	1086	1459	-1479	-1329	-1217	1506	1588	-1059	1273	1323	-1434	-1184	-1271	-1369
1274	-1058	1087	-1773	-1478	-1328	-1216	-1507	-1587	-1058	1274	-1165	-1433	-1183	-1270	-1368
1275	-1057	1088	1279	-1477	-1156	-1215	1508	-1170	-1057	1275	-1164	-1432	-1182	-1269	-1367
1276	-1056	1089	-1278	-1476	-1627	-1214	1509	-1169	-1056	1276	-1163	-1431	-1181	-1268	-1366
1277	-1055	1090	-1277	-1475	1441	-1213	1424	-1386	-1055	1277	-1162	-1430	1180	-1267	-1365
1278	-1054	1091	-1276	-1474	-1152	-1212	-1668	-1552	-1054	1278	-1161	-1429	-1179	-1266	-1364
1279	-1053	1092	-1685	-1473	1151	1763	-1667	-1570	-1053	1279	-1160	-1428	-1178	-1265	-1257
1280	-1052	1093	-1684	-1472	1241	1764	-1666	1515	-1052	1280	-1159	-1427	-1177	1704	-1256
1281	-1051	1094	-1683	-1471	1400	1765	-1665	1516	-1051	1281	-1158	-1229	-1176	1705	-1255
1282	-1050	1095	-1682	-1470	-1211	1766	-1664	1517	-1050	1282	-1514	-1228	-1175	1706	-1606
1283	-1049	1096	-1681	-1469	1731	1767	1500	1518	-1049	1283	-1513	-1227	-1174	1707	-1605
1284	-1048	1097	-1680	1672	1732	-1202	1501	-1422	-1048	1284	-1512	-1226	-1173	1708	-1604
1285	-1047	1098	-1679	1673	-1749	-1201	1322	-1421	-1047	1285	-1451	-1225	-1172	1709	-1603
1286	-1046	1099	-1678	1674	-1750	-1200	1167	-1420	-1046	1286	-1450	-1224	-1171	1710	-1602
1287	-1045	1100	-1677	-1675	-1455	-1199	1168	1231	-1045	1287	1683	-1223	-1586	1711	-1601
1288	-1672	1101	-1676	1676	1243	-1198	1387	1232	-1044	1288	1684	-1222	-1585	1712	-1600
1289	-1671	1102	-1675	1677	1380	-1197	-1388	1233	-1043	1289	1753	-1221	-1584	1713	-1599
1290	-1670	1103	-1674	1678	1381	-1196	1389	-1658	-1042	1290	1754	-1220	-1583	1714	-1598
1291	-1669	1104	1418	1408	-1632	-1195	1390	-1679	-1041	1291	1755	1592	-1582	1715	-1597
1292	-1668	1105	1419	-1463	-1631	-1260	-1336	-1407	-1040	1292	1756	-1593	-1581	1716	-1466
1293	-1667	1106	1420	-1462	-1630	-1259	1335	1194	-1039	1293	-1757	1594	-1580	1717	-1465
1294	-1666	1107	1421	-1461	-1565	-1618	-1334	-1289	-1038	1294	1758	-1595	-1579	1718	-1464
1295	-1665	1108	1422	-1275	1484	1553	-1333	-1293	-1037	1295	1759	1596	-1578	1719	-1463
1296	-1664	1109	1423	-1412	1485	1554	-1332	-1292	-1036	1296	1760	1467	-1577	1720	-1462
1297	-1663	1110	1510	-1411	1486	1555	-1331	1540	1297	1297	1761	1468	-1576	1721	-1461
1298	1509	1111	1511	-1410	-1383	1556	-1330	1541	1298	1298	1762	-1539	-1575	1722	-1275
1299	1510	1112	1512	-1409	-1516	1557	1533	-1365	1299	1299	-1526	-1538	-1574	1723	-1274
1300	1511	1113	-1415	1464	-1515	-1677	1534	-1364	1300	1300	-1525	-1537	-1573	1724	-1460
1301	1512	1114	-1414	1465	-1514	-1676	1535	-1175	1301	1301	1499	-1536	-1572	1725	-1273
1302	1513	1115	-1413	1466	-1297	-1675	1536	-1174	1302	1302	1500	-1535	-1571	1726	-1272
1303	1514	1116	-1412	1597	1295	-1674	1537	1173	1303	1303	1501	-1534	1710	1727	-1306
1304	1515	1117	-1411	1318	1196	-1673	1538	-1172	1304	1304	1322	-1533	1711	1728	-1305
1305	1516	1118	-1410	1319	1188	-1672	1539	-1171	1305	1305	1167	1330	1712	1729	-1304
1306	1517	-1397	-1409	1320	1189	1469	-1468	1529	1306	1306	1168	1331	1713	1730	1615
1307	1518	-1396	-1408	1321	1190	1470	-1467	1530	1307	1307	1387	1332	1714	1731	1616
1308	1519	-1395	-1407	1502	1192	1471	-1596	-1748	1308	1308	1388	1333	1715	1732	1617
1309	1520	-1394	-1406	1503	1193	1472	1595	1749	1309	1309	1389	1334	1716	1733	-1552
1310	1521	-1393	1740	1504	-1540	1473	-1594	-1751	1310	1310	1390	-1335	1717	1734	-1327
1311	1522	-1392	1741	1505	1292	-1598	1593	1734	1311	1311	-1336	1336	1718	1735	-1326
1312	1523	-1391	1742	1506	1293	-1597	-1592	-1736	1312	1312	1335	-1390	1719	1736	-1324
1313	1524	-1390	1743	1507	1294	-1410	1220	-1750	1313	1313	-1334	-1389	1720	1737	-1323
1314	1525	-1389	1744	1508	-1296	-1409	1221	1746	1314	1314	-1333	-1388	1721	1738	-1322
1315	1526	-1388	1745	1509	-1195	-1408	1222	-1745	1315	1315	-1332	-1387	1722	1739	-1501
1316	1527	-1387	1746	1424	1201	-1678	1223	1735	1316	1316	-1331	-1168	1723	1740	-1500
1317	1528	-1386	1747	1628	-1198	1558	1224	-1738	1317	1317	-1330	-1167	1724	1741	-1499
1318	1529	-1385	1748	1693	-1197	-1610	1225	1737	1318	1318	1533	-1322	1725	1742	-1498
1319	1530	-1384	1749	1413	1200	-1609	1226	-1744	1319	1319	1534	-1501	1726	1743	-1497
1320	1531	-1383	1750	1414	-1194	-1608	1228	1747	1320	1320	1535	-1500	1727	1744	-1290
1321	1532	-1382	1751	1415	1541	-1607	1227	1730	1321	1321	1536	-1499	1728	1745	-1396
1322	1533	-1381	1752	1416	-1249	1366	1229	-1732	1322	1322	1537	1525	1729	1746	-1395
1323	1534	-1380	1753	-1417	-1248	1315	1427	1740	1323	1323	1538	1526	1730	1747	-1394
1324	1535	-1379	1754	1418	-1247	1316	1428	1742	1324	1324	1539	-1762	1731	1748	-1393
1325	1536	-1378	1482	-1422	-1607	1317	1429	-1741	1325	1325	-1468	-1761	1732	1749	-1392
1326	1537	-1377	1483	1419	-1246	1318	1430	1743	1326	1326	-1467	-1760	1733	1750	-1391
1327	1538	-1376	1484	1420	-1245	1319	1431	1739	1327	1327	-1596	-1759	1734	1751	1547
1328	1539	-1375	1485	1421	-1379	1320	1432	1733	1328	1328	1595	-1758	1735	1752	-1446
1329	1540	-1374	1486	1423	1378	1321	1433	-1729	1329	1329	-1594	1757	1736	1753	1561
1330	1541	-1373	1487	1510	1377	1502	1434	1731	1330	1330	1593	-1756	1737	1754	1562
1331	1542	-1372	1488	1511	-1376	1503	1435	1727	1331	1331	-1592	-1755	1738	1755	1563
1332	1543	-1371	1489	1512	-1351	1504	1436	-1728	1332	1332	1220	-1754	1739	1756	1564
1333	1544	-1370	1490	1513	1363	1505	1437	-1724	1333	1333	1221	-1753	1740	1757	1237
1334	1545	-1369	1491	1514	1258	1506	-1419	1725	1334	1334	1222	-1684	1741	1758	1238
1335	1546	-1368	1492	-1231	1259	-1507	-1418	1726	1335	1335	1223	-1683	1742	1759	1239
1336	1547	-1367	1493	-1437	1260	1508	1417	-1723	1336	1336	1224	1450	1743	1760	1240
1337	1548	-1366	1494	-1436	-1563	1509	-1416	-1721	1337	1337	1225	1451	1744	1761	1241
1338	1549	-1365	1495	-1433	-1562	1424	-1415	-1722	1338	1338	1226	1512	1745	1762	1242
1339	1550	-1364	1496	1211	-1561	-1668	1634	1720	1339	1339	1227	1513	1746	1763	1243
1340	1551	-1363	1497	1212	1446	-1667	1635	1719	1340	1340	1228	1514	1747	1764	1380
1341	1552	-1362	1498	1213	-1547	-1666	1636	1718	1341	1341	1229	1158	1748	1765	1381
1342	1553	-1361	1499	1214	1391	-1665	1637	-1717	1342	1342	1427	1159	1749	1766	-1632
1343	1554	-1360	1500	1368	-1591	-1664	1638	-1716	1343	1343	1428	1160	1750	1767	-1631
1344	1555	-1359	1501	1369	-1590	1612	1639	1715	1344	1344	1429	1161	1751	1768	-1630
1345	1556	-1358	1322	1370	-1392	1613	1640	-1714	1345	1345	1430	1162	1752	1769	1495
1346	1557	-1357	1323	1371	1388	1614	1641	-1713	1346	1346	1431	1163	-1219	1770	1496
1347	1558	-1356	1324	1560	1389	-1303	-1519	-1712	1347	1347	1432	1164	-1218	1771	1748
1348	1559	-1355	-1361	1280	1497	-1302	-1511	-1711	1348	1348	1433	1165	-1217	1772	1749
1349	1560	-1354	-1360	-1281	1498	-1301	-1510	-1710	1349	1349	1434	-1323	-1216	-1445	-1751
1350	1561	-1353	-1359	1282	1499	1748	-1423	1571	1350	1350	1435	-1166	-1215	-1671	1750
1351	1562	-1352	-1358	1283	1500	1749	-1705	1572	1351	1351	1436	1324	-1214	-1670	-1747
1352	1563	-1351	-1357	1284	1501	-1751	-1704	-1461	1352	1352	1437	1326	-1213	-1669	1746
1353	1564	-1350	-1356	1285	1322	-1750	1183	-1275	1353	1353	-1419	1327	-1212	-1668	1741
1354	1565	-1349	-1355	1498	1323	-1731	1184	-1274	1354	1354	-1418	-1709	-1211	-1667	1742
1355	1566	-1348	-1354	1499	1324	-1735	1185	-1460	1355	1355	1417	-1708	-1210	-1666	1743
1356	1567	-1347	-1353	1500	1326	1745	1186	-1545	1356	1356	-1416	-1707	-1209	-1665	1744
1357	1568	-1346	1307	1530	1327	1746	1187	-1544	1357	1357	-1415	-1706	-1208	-1664	1745
1358	1569	-1345	-1271	1531	-1411	1734	-1375	-1154	1358	1358	1634	1452	-1207	-1663	-1740
1359	1570	-1344	-1270	-1532	-1466	-1736	-1374	1153	1359	1359	1635	1453	-1206	-1662	-1739
1360	1571	-1343	-1269	1198	-1465	-1737	-1617	1442	1360	1360	1636	1268	-1551	-1661	-1738
1361	1572	-1342	1561	-1572	1668	-1744	-1616	1443	1361	1361	1637	1269	-1550	-1660	-1737
1362	1573	-1341	1562	-1202	1669	1742	-1615	-1283	1362	1362	1638	1270	-1549	-1659	-1736
1363	1574	-1340	1446	-1201	-1663	-1739	1304	1276	1363	1363	1639	1271	-1548	-1658	1734
1364	1575	-1339	1447	-1200	-1662	-1730	-1305	1532	1364	1364	1640	-1307	-1547	-1657	1735
1365	1576	-1338	1448	-1199	-1661	1741	1306	-1521	1365	1365	1641	-1493	1391	-1656	-1733
1366	1577	-1337	1449	1573	-1660	1743	-1591	-1249	1366	1366	-1519	-1498	1392	1567	-1732
1367	1578	-1336	1785	-1333	-1659	-1724	-1590	-1248	1367	1367	-1511	-1497	1393	1568	-1731
1368	1579	-1335	1786	-1332	-1658	-1726	-1589	-1247	1368	1368	-1510	-1290	1394	1569	-1730
1369	1580	-1334	1787	-1331	-1657	-1725	1588	-1246	1369	1369	-1423	-1396	1395	1570	-1729
1370	1581	-1333	-1788	-1330	-1656	-1723	-1587	-1245	1370	1370	-1705	-1395	1396	1571	-1728
1371	1582	-1332	-1784	1533	1567	1718	-1170	-1379	1371	1371	-1704	1492	1290	1572	-1727
1372	1583	-1331	-1783	1534	1357	-1719	-1169	-1378	1372	1372	1183	-1394	1291	1573	-1726
1373	1584	-1330	-1782	1535	-1347	1720	-1386	-1377	1373	1373	1184	-1393	-1444	1574	-1725
1374	1585	-1329	-1781	1536	1448	-1722	-1552	-1376	1374	1374	1185	-1392	-1443	1575	-1724
1375	1586	-1328	-1780	1537	1449	1721	-1570	-1250	1375	1375	1186	-1391	-1442	1576	-1723
1376	1587	-1327	-1779	1538	-1682	-1717	1515	1542	1376	1376	1187	1547	-1153	1577	-1722
1377	1588	-1326	-1778	1539	-1681	1716	1516	1280	1377	1377	-1375	-1446	1154	1578	-1721
1378	1589	-1325	-1777	-1468	-1680	1715	1517	-1281	1378	1378	-1617	-1617	1155	1579	-1720
1379	1590	-1324	1776	1373	-1679	-1714	1518	1282	1379	1379	-1616	-1616	1156	1580	-1719
1380	1591	-1323	-1775	1374	-1407	-1713	-1422	1548	1380	1380	-1615	-1615	1157	1581	-1718
1381	1592	-1322	1450	1375	-1406	-1712	-1421	1549	1381	1381	1304	1304	1158	1582	-1717
1382	1593	-1321	1451	-1188	-1405	-1711	-1420	1550	1382	1382	-1305	-1305	1159	1583	-1716
1383	1594	-1320	1452	-1187	-1263	-1710	1231	1367	1383	1383	1306	1306	1160	1584	-1715
1384	1595	-1319	1453	1490	-1262	1571	1232	1368	1384	1384	-1591	-1591	1161	1585	-1714
1385	1596	-1318	1454	1491	-1368	1572	1233	1369	1385	1385	-1590	-1590	1162	1586	-1713
1386	1597	-1317	1455	1492	-1367	-1461	1234	1370	1386	1386	-1589	-1589	1163	1587	-1712
1387	1598	-1316	1456	1292	-1366	-1275	1235	1371	1387	1387	1588	1588	1164	1588	-1711
1388	1599	-1315	1686	1667	-1365	-1274	1236	1372	1388	1388	-1587	-1587	-1165	1589	-1710
1389	1600	-1127	1687	1668	1176	-1460	-1520	-1768	1389	1389	-1170	-1170	1166	1590	1571
1390	1601	-1126	1688	1669	1439	-1273	1642	1203	1390	1390	-1169	-1169	1167	1591	1572
1391	1602	-1125	1689	1670	1440	-1272	1643	1204	1391	1391	-1386	-1386	1168	1592	1573
1392	1603	-1124	1690	-1293	1781	-1653	1644	1205	1392	1392	-1552	-1552	1169	1593	1574
1393	1604	-1123	1774	-1666	-1470	-1652	1645	1769	1393	1393	-1570	-1570	1170	1594	1575
1394	1605	-1122	1563	-1665	-1482	-1651	1646	1770	1394	1394	1515	1515	1587	1595	1576
1395	1606	-1121	1564	-1496	1624	-1650	1647	1771	1395	1395	1516	1516	1588	1596	1577
1396	1607	-1120	-1515	-1495	1625	-1649	1648	1772	1396	1396	1517	1517	1589	1467	1578
1397	1608	-1119	-1652	-1494	1626	-1648	1649	-1445	1397	1397	1518	1518	1590	1468	1579
1398	1609	1398	-1651	-1493	1474	-1647	1650	-1671	1398	1398	-1422	-1422	1591	-1539	1580
1399	1610	1399	-1650	1540	1779	-1646	1651	-1670	1399	1399	-1421	-1421	1592	-1538	1581
1400	1611	1400	-1649	1541	1780	-1645	1652	-1669	1400	1400	-1420	-1420	1593	-1537	1582
1401	1612	1401	-1648	1567	-1473	-1644	1653	-1621	1401	1401	1231	1231	1594	-1536	1583
1402	1613	1402	-1647	1344	-1472	-1643	1272	1628	1402	1402	1232	1232	1595	-1535	1584
1403	1614	1403	-1646	1345	1471	-1642	1273	1702	1403	1403	1233	1233	1596	-1534	1585
1404	1615	1404	-1645	1727	1783	1520	1460	1261	1404	1404	1234	1234	1467	-1533	1586
1405	1616	1405	-1644	1728	1554	-1236	1274	1262	1405	1405	1235	1235	1468	1330	1307
1406	1617	1406	-1643	1729	1555	-1235	1275	1278	1406	1406	1236	1236	-1539	1331	-1271
1407	1618	1407	-1642	1730	1556	-1234	1461	1279	1407	1407	-1520	-1520	-1538	1332	-1270
1408	1619	1408	-1641	1731	1557	-1233	-1572	1773	1408	1408	1642	1642	-1537	1333	-1269
1409	1620	1409	-1640	1732	1558	-1232	-1571	1774	1409	1409	1643	1643	-1536	1334	-1268
1410	1621	1410	1639	1733	1559	-1231	1710	1775	1410	1410	1644	1644	-1535	1335	-1453
1411	1622	1411	-1638	1734	1560	1420	1711	1776	1411	1411	1645	1645	-1534	1336	-1452
1412	1623	1412	1637	1735	-1239	1421	1712	1777	1412	1412	1646	1646	-1533	1337	-1451
1413	1624	1413	-1636	1736	-1238	1422	1713	1778	1413	1413	1647	1647	1330	1338	-1450
1414	1625	1414	-1635	1737	-1237	-1518	1714	1489	1414	1414	1648	1648	1331	1427	1683
1415	1626	1415	-1634	1738	-1564	-1517	-1715	-1182	1415	1415	1649	1649	1332	1428	1684
1416	1627	1416	-1633	1739	-1301	-1516	1716	-1181	1416	1416	1650	1650	1333	1429	1685
1417	1628	1417	-1632	1740	-1308	-1515	1717	1180	1417	1417	1651	1651	1334	1430	1686
1418	1629	1418	-1631	1741	1309	1570	1718	-1179	1418	1418	1652	1652	-1335	1431	1687
1419	1630	1419	-1630	1742	1310	1552	-1719	-1178	1419	1419	1653	1653	1336	1432	1688
1420	1631	1420	-1629	1743	1311	1386	-1720	1253	1420	1420	1272	1272	-1390	1433	1689
1421	1632	1421	-1692	1744	1312	1169	1722	1254	1421	1421	1273	1273	-1389	1434	1690
1422	1633	1422	1673	1745	-1287	1170	1721	-1523	1422	1422	1460	1460	-1388	1435	1691
1423	1634	1423	-1417	1746	-1286	1587	1723	-1522	1423	1423	1274	1274	-1387	1436	1692
1424	1635	1424	-1416	1747	-1285	-1588	1725	-1329	1424	1424	1275	1275	-1386	1437	1629
1425	1636	1425	1513	1748	-1273	1589	1726	-1328	1425	1425	1461	1461	-1385	1438	-1494
1426	1637	1426	1514	1749	-1272	1590	1724	-1156	1426	1426	-1572	-1572	-1384	1439	-1493
1427	1638	1427	1653	1750	-1306	1591	-1728	-1155	1427	1427	-1571	-1571	-1383	1440	-1492
1428	1639	1428	1654	1751	-1305	-1306	-1727	1438	1428	1428	1710	1710	-1382	1441	-1491
1429	1640	1429	1655	1752	-1304	1305	-1747	1439	1429	1429	1711	1711	-1381	1442	-1490
1430	1641	1430	-1566	-1219	1615	-1304	-1740	1440	1430	1430	1712	1712	-1380	1443	1183
1431	1642	1431	-1565	-1184	1539	1615	1732	1441	1431	1431	1713	1713	-1243	1444	1184
1432	1643	1432	1516	-1218	-1468	1616	-1730	-1152	1432	1432	1714	1714	-1242	-1291	1185
1433	1644	1433	1517	-1217	-1467	1617	-1737	1151	1433	1433	-1715	-1715	-1241	-1290	1186
1434	1645	1434	1518	-1216	-1596	1375	-1744	-1680	1434	1434	1716	1716	-1240	-1396	1187
1435	1646	1435	1519	-1215	-1595	-1187	-1743	-1657	1435	1435	1717	1717	-1239	-1395	-1375
1436	1647	1436	1520	-1334	-1594	-1186	1742	1661	1436	1436	1718	1718	-1238	-1394	-1374
1437	1648	1437	1521	1307	1593	-1185	1741	-1699	1437	1437	-1719	-1719	-1237	-1393	-1373
1438	1649	1438	1522	-1271	-1592	-1184	1739	-1698	1438	1438	-1720	-1720	-1236	-1392	1157
1439	1650	1439	1523	-1547	-1387	-1183	-1736	1287	1439	1439	1722	1722	-1235	-1391	1158
1440	1651	1440	1524	1391	-1386	1704	1733	-1277	1440	1440	1721	1721	-1234	-1390	1159
1441	1652	-1652	1525	1392	-1385	1705	1738	-1531	1441	1441	1723	1723	-1233	-1389	1160
1442	1653	-1651	1526	-1381	-1384	1423	1735	1301	1442	1442	-1726	-1726	-1232	-1388	1161
1443	1654	-1650	1527	1382	-1271	1510	-1731	1302	1443	1443	-1725	-1725	-1231	-1387	1162
1444	1655	-1649	1528	1383	-1270	1511	1729	1303	1444	1444	1724	1724	-1437	-1386	1163
1445	1656	-1648	1529	1384	-1269	1519	1745	-1614	1445	1445	-1728	-1728	-1436	-1385	1164
1446	1657	-1647	1530	1385	-1268	-1641	1746	-1613	1446	1446	-1727	-1727	-1435	-1384	-1165
1447	1658	-1646	1531	-1605	-1645	-1640	1750	-1612	1447	1447	-1731	-1731	-1434	-1383	1166
1448	1659	-1645	1532	-1604	-1646	-1639	1734	1664	1448	1448	1729	1729	-1433	-1382	1167
1449	1660	-1644	-1203	-1603	-1644	-1638	1751	1665	1449	1449	-1733	1745	-1432	-1381	1168
1450	1661	-1643	-1202	-1602	1643	-1637	-1749	1666	1450	1450	-1739	-1746	-1431	-1380	1169
1451	1662	-1642	-1201	-1601	-1642	-1636	-1748	1667	1451	1451	-1743	1750	-1430	-1379	1170
1452	-1508	-1641	-1200	-1600	-1641	-1635	1301	1668	1452	1452	1742	1736	-1429	-1378	1587
1453	-1507	-1640	-1199	-1599	-1650	-1634	1302	-1424	1453	1453	-1741	-1739	1427	-1377	1588
1454	-1506	-1639	-1198	-1598	-1640	1415	1303	-1509	1454	1454	-1740	1747	1428	-1376	1589
1455	-1505	-1638	-1197	-1206	1639	1416	-1614	-1508	1455	1455	1732	1730	-1229	1189	1590
1456	-1504	-1637	-1196	-1551	-1638	-1417	-1613	-1507	1456	1456	-1730	-1732	-1228	1190	1591
1457	-1503	-1636	-1195	-1550	-1637	1418	-1612	-1506	1457	1457	-1747	1740	-1227	1191	1592
1458	-1502	-1635	-1194	-1549	-1636	1419	-1499	-1505	1458	1458	1744	1741	-1226	1192	-1593
1459	-1501	-1634	-1193	-1548	1635	-1437	1525	-1504	1459	1459	1737	-1742	-1225	1193	1594
1460	-1500	-1633	1572	-1270	-1634	-1436	1526	-1503	1460	1460	1738	1743	-1224	1194	1595
1461	-1499	-1632	1573	1434	-1633	-1435	-1762	-1502	1461	1461	-1735	1744	-1223	1195	1596
1462	-1498	-1631	1574	1435	1382	-1434	-1761	-1321	1462	1462	1745	1737	-1222	1196	1467
1463	-1497	-1630	1575	1660	1517	-1433	-1760	-1320	1463	1463	-1746	1738	-1221	1197	1468
1464	-1496	-1629	1576	1661	-1518	-1432	-1759	-1319	1464	1464	1750	1735	-1220	1198	-1539
1465	-1495	-1628	1577	1662	1519	-1431	-1758	-1318	1465	1465	1736	-1733	1753	1199	-1538
1466	-1494	-1627	1578	1663	1359	-1430	1757	-1317	1466	1466	-1734	1734	1754	1200	-1537
1467	-1493	-1626	1579	1664	1360	-1429	-1756	-1316	1467	1467	1751	1751	1755	1201	-1536
1468	-1492	-1625	1580	1497	-1488	-1428	1561	-1315	1468	1468	-1749	-1749	1756	1202	-1535
1469	-1491	-1624	1581	-1698	-1487	-1427	1562	-1366	1469	1469	-1748	-1748	1757	1203	-1534
1470	-1490	-1623	1582	-1697	-1307	-1229	1563	1607	1470	1470	1301	1301	1758	1204	-1533
1471	-1489	-1622	1583	-1696	-1586	-1228	1564	1608	1471	1471	1302	1302	1759	1205	1330
1472	-1488	-1621	1584	1694	-1585	-1227	1237	1609	1472	1472	1303	1303	1760	1206	1331
1473	-1487	-1620	-1178	1695	-1584	-1226	1238	1610	1473	1473	-1614	-1614	1761	1207	1332
1474	-1486	-1619	-1177	-1585	-1583	-1225	1239	1611	1474	1474	-1613	-1613	1762	1208	1333
1475	-1485	-1618	-1176	-1584	-1582	-1224	1240	-1663	1475	1475	-1612	-1612	1763	1209	1334
1476	-1484	-1617	-1175	1260	-1581	-1223	1241	-1662	1476	1476	1664	1664	1764	1210	-1335
1477	-1483	-1616	1273	1261	1580	-1222	1242	-1660	1477	1477	1665	1665	1765	1211	1336
1478	-1482	-1615	-1693	1262	-1579	-1221	1243	-1659	1478	1478	1666	1666	1766	1212	-1390
1479	-1481	-1614	-1628	1263	-1578	-1220	1632	1234	1479	1479	1667	1667	1767	1213	-1389
1480	-1480	-1613	-1424	1264	-1577	1592	-1381	-1235	1480	1480	1668	1668	1768	1214	-1388
1481	-1479	-1612	-1509	-1703	1576	-1593	-1380	1236	1481	1481	-1424	-1424	1769	1215	-1387
1482	-1478	-1611	-1508	-1702	-1575	1594	-1631	-1520	1482	1482	-1509	-1509	1770	1216	-1386
1483	-1477	-1610	-1507	-1701	-1574	-1595	-1400	1642	1483	1483	-1508	-1508	1771	1217	-1385
1484	-1476	-1609	-1506	-1700	-1573	1596	-1340	1643	1484	1484	-1507	-1507	1772	1218	-1384
1485	-1475	-1608	-1505	-1699	-1572	1467	-1339	1644	1485	1485	-1506	-1506	-1445	1219	-1383
1486	-1474	-1607	-1504	1286	-1571	1468	-1426	1645	1486	1486	-1505	-1505	-1671	1220	-1382
1487	-1473	-1606	-1503	1287	1710	-1539	-1425	1646	1487	1487	-1504	-1504	-1670	1221	1633
1488	-1472	-1605	1502	1288	1711	-1538	-1401	1647	1488	1488	-1503	-1503	-1669	1222	1634
1489	-1471	-1604	-1321	1289	-1712	-1537	1633	1648	1489	1489	-1502	-1502	-1668	1223	1635
1490	-1470	-1603	-1320	1248	1714	-1536	-1414	1649	1490	1490	-1321	-1321	-1667	1224	1636
1491	-1469	-1602	1767	1249	1715	-1535	-1413	1650	1491	1491	-1320	-1320	-1666	1225	1637
1492	-1468	-1601	-1204	1250	1716	-1534	-1412	1651	1492	1492	-1319	-1319	-1665	1226	1638
1493	-1467	-1600	-1329	1251	1717	-1533	-1411	1652	1493	1493	-1318	-1318	-1664	1227	1639
1494	-1466	-1599	-1328	1252	-1718	1330	-1466	1653	1494	1494	-1317	-1317	-1663	1228	1640
1495	-1465	-1598	-1327	1253	1719	1331	-1465	1272	1495	1495	-1316	-1316	-1662	1229	1641
1496	-1464	-1597	-1326	1254	1720	1332	-1464	1273	1496	1496	-1315	-1315	-1661	1230	1642
1497	-1463	-1596	-1325	1682	1721	1333	-1463	-1309	1497	1497	-1366	-1366	-1660	1231	1643
1498	-1462	-1595	1362	1449	1722	1334	-1462	-1308	1498	1498	1607	1607	-1659	1232	1644
1499	-1461	-1594	1363	-1623	1723	-1335	1573	-1352	1499	1499	1608	1608	-1658	1233	1645
1500	-1460	-1593	1258	-1259	1724	1336	1574	-1351	1500	1500	1609	1609	-1657	1234	1646
1501	-1459	-1592	1259	-1258	1725	-1390	1610	1363	1501	1501	1610	1610	-1656	1235	1647
1502	-1458	-1591	1260	-1588	1726	-1389	1611	1258	1502	1502	1611	1611	1567	1236	1648
1503	-1457	-1590	1261	-1587	1727	-1388	-1663	1263	1503	1503	-1663	-1663	1344	1237	1649
1504	-1456	-1589	1262	1589	1728	-1387	-1662	1264	1504	1504	-1662	-1662	1345	1238	1650
1505	-1455	-1588	1263	1590	1729	-1168	-1660	-1703	1505	1505	-1660	-1660	1346	1239	1651
1506	-1454	-1587	1264	1563	1713	-1167	-1659	-1209	1506	1506	-1659	-1659	1347	1240	1652
1507	-1453	-1586	-1703	1564	1730	-1322	-1658	-1208	1507	1507	-1658	-1658	-1357	1241	1653
1508	-1452	-1585	-1702	1784	-1420	-1501	-1679	-1207	1508	1508	-1679	-1679	-1356	1242	1654
1509	-1451	-1584	-1701	1788	-1419	-1500	-1407	-1206	-1662	1509	-1407	-1407	-1355	1243	1655
1510	-1450	-1583	-1700	-1244	-1418	-1499	1194	-1310	-1661	1510	1194	1194	-1354	1244	-1566
1511	-1449	-1582	-1699	-1787	1417	1525	-1289	-1447	-1660	1511	-1289	-1289	-1353	1245	-1565
1512	-1448	-1581	-1698	-1786	-1416	1526	-1288	-1189	-1659	1512	-1288	-1288	1307	1246	1484
1513	-1447	-1580	-1697	-1785	-1415	-1762	1619	-1188	-1658	1513	1619	1619	-1271	1247	1485
1514	-1446	-1579	-1696	1591	-1414	-1761	1621	1251	-1657	1514	1621	1621	-1270	1248	1486
1515	-1445	-1578	1694	1592	-1302	-1760	1622	1211	-1656	1515	1622	1622	-1269	1249	1487
1516	-1444	-1577	1695	1593	1276	-1759	1623	1210	-1655	1516	1623	1623	-1268	1250	1488
1517	-1443	-1576	1460	1594	1277	-1758	-1481	1448	-1654	1517	-1481	-1481	-1314	1251	-1360
1518	-1442	-1575	1274	1595	-1348	1757	-1480	1449	-1653	1518	-1480	-1480	-1350	1252	-1359
1519	-1441	-1574	1275	1596	1265	-1756	-1479	-1682	-1652	1519	-1479	-1479	-1349	1253	-1358
1520	-1440	-1573	1461	1467	-1225	-1755	-1478	-1681	-1651	1520	-1478	-1478	-1348	1254	1704
1521	-1439	-1572	1462	1552	1224	-1754	-1477	-1300	-1650	1521	-1477	-1477	1265	1255	1705
1522	-1438	-1571	1463	-1522	-1223	-1753	-1620	-1299	-1649	1522	-1620	-1620	1266	1256	1706
1523	-1437	-1570	-1442	-1521	-1222	-1684	-1697	-1298	-1648	1523	-1697	-1697	1267	1257	1707
1524	-1436	-1569	-1441	-1520	1221	-1683	1696	-1297	-1647	1524	1696	1696	1315	1258	1708
1525	-1435	-1568	-1440	-1519	-1220	1466	1694	-1296	-1646	1525	1694	1694	1316	1259	1709
1526	-1434	-1567	-1439	-1518	-1708	1411	1701	-1295	-1645	1526	1701	1701	1317	1260	-1570
1527	-1433	-1566	1658	-1517	1461	1412	1693	-1294	-1644	1527	1693	1693	1318	1261	-1569
1528	-1432	-1565	1659	-1516	1462	1413	-1695	-1288	-1643	1528	-1695	-1695	1319	1262	-1568
1529	-1431	-1564	1660	-1515	1753	1414	-1700	1619	-1642	1529	-1700	-1700	1320	1263	-1343
1530	-1430	-1563	1661	1778	1707	-1633	-1656	1622	-1641	1530	-1656	-1656	1321	1264	1342
1531	-1429	-1562	1662	-1777	-1549	1401	-1346	1623	-1640	1531	-1346	-1346	1502	-1703	-1341
1532	-1428	-1561	1663	-1776	1169	1425	1567	-1481	-1639	1532	1567	1567	1503	-1702	-1340
1533	-1427	-1560	1664	-1775	-1553	1426	1344	-1480	-1638	1533	1344	1344	1504	-1701	-1339
1534	-1426	-1559	1665	-1774	1618	1339	1345	-1479	-1637	1534	1345	1345	1505	-1700	-1426
1535	-1425	-1558	1666	-1773	1278	1340	1347	-1478	-1636	1535	1347	1347	1506	-1699	-1425
1536	-1424	-1557	1667	-1279	1279	1342	-1357	-1477	-1635	1536	-1357	-1357	1507	-1698	-1401
1537	-1423	-1556	1668	-1278	1773	1343	-1356	-1620	-1634	1537	-1356	-1356	1508	-1697	-1400
1538	-1422	-1555	1669	-1277	1774	1568	-1483	-1697	-1633	1538	-1483	-1483	1509	-1696	-1399
1539	-1421	-1554	1670	-1276	1775	1569	-1482	1696	-1632	1539	-1482	-1482	1424	1694	-1398
1540	-1420	-1553	1671	1312	1776	-1157	1624	1694	-1631	1540	1624	1624	1628	1695	-1397
1541	-1419	-1552	1445	1313	1777	1373	1625	1701	-1630	1541	1625	1625	1693	-1693	1785
1542	-1418	-1551	-1772	-1362	1778	1374	1626	1693	-1629	1542	1626	1626	-1695	-1628	1786
1543	-1417	-1550	-1771	-1361	1369	1446	1627	-1695	-1628	1543	1627	1627	-1694	-1424	1787
1544	-1416	-1549	-1770	1489	1371	-1547	1402	-1700	-1627	1544	1402	1402	1696	-1509	1244
1545	-1415	-1548	-1769	-1397	1372	1391	1325	-1656	-1626	1545	1325	1325	1697	-1508	-1788
1546	-1414	-1547	-1768	-1247	1320	1392	1403	-1346	-1625	1546	1403	1403	1698	-1507	-1784
1547	-1413	-1546	1241	-1246	1313	1393	1404	1567	-1624	1547	1404	1404	1699	-1506	1524
1548	-1412	-1545	1609	1440	-1362	1394	1405	1344	-1623	1548	1405	1405	1700	-1505	1525
1549	-1411	-1544	1610	1542	-1475	-1492	1406	1345	-1622	1549	1406	1406	1701	-1504	1526
1550	-1410	-1543	1611	1543	1361	1395	-1193	1347	-1621	1550	-1193	-1193	1702	-1503	-1762
1551	-1409	-1542	1612	1544	1476	1396	-1192	-1357	-1620	1551	-1192	-1192	1703	-1502	-1761
1552	-1408	-1541	1613	1545	1477	1290	1681	-1356	-1619	1552	-1191	1681	-1264	-1321	-1760
1553	-1407	-1540	1614	1546	-1478	1497	1682	-1483	-1618	1553	-1190	1682	-1263	-1320	-1759
1554	-1406	-1539	1615	-1158	1479	1498	-1449	-1482	-1617	1554	-1459	-1449	-1262	-1319	-1758
1555	-1405	-1538	1616	-1157	-1480	1493	-1448	1624	-1616	1555	-1458	-1448	-1261	-1318	-1757
1556	-1404	-1537	1617	-1156	1481	1307	-1210	-1306	-1615	1556	-1457	-1210	-1260	-1317	-1756
1557	-1403	-1536	-1552	-1155	-1623	-1271	-1211	1305	-1614	1557	-1456	-1211	-1259	-1316	-1755
1558	-1402	-1535	1373	-1154	-1622	-1270	1527	-1304	-1613	1558	-1455	1527	-1258	-1315	-1754
1559	-1401	-1534	1374	1153	-1621	-1269	1528	1615	-1612	1559	-1454	1528	-1363	-1314	-1753
1560	-1400	-1533	1375	1442	1620	-1268	1353	1616	-1611	1560	1780	1353	1351	-1313	1220
1561	-1399	-1532	-1188	1443	1600	-1453	1354	1617	-1610	1561	1781	1354	1352	-1312	1221
1562	-1398	-1531	-1187	1444	1203	-1452	1355	1375	-1609	1562	1782	1355	1308	-1311	1222
1563	-1397	-1530	-1186	-1291	1204	1706	-1783	-1187	-1608	1563	1783	-1783	1309	-1310	1223
1564	-1396	-1529	1252	-1290	1785	1707	-1782	-1186	-1607	1564	-1355	-1782	1310	-1309	1224
1565	-1395	-1528	1253	-1396	1786	1708	-1781	-1185	-1606	1565	-1354	-1781	1311	-1308	1225
1566	-1394	-1527	1254	-1395	1787	1709	-1780	-1184	-1605	1566	-1353	-1780	1312	-1352	1226
1567	-1393	-1526	1255	-1394	1244	-1327	1454	-1183	-1604	1567	-1528	1454	1313	-1351	1227
1568	-1392	-1525	1545	1304	-1788	-1326	1455	1704	-1603	1568	-1527	1455	-1362	-1350	1228
1569	-1391	-1524	1546	1305	-1784	-1324	1456	1705	-1602	1569	1211	1456	-1361	-1349	1229
1570	-1390	-1523	1547	1306	1232	1166	1457	1423	-1601	1570	1210	1457	1489	-1348	-1428
1571	-1389	-1522	1548	1272	1233	1323	1458	1510	-1600	1571	1448	1458	1490	-1347	-1427
1572	-1388	-1521	1549	1329	1234	-1165	1459	1511	-1599	1572	1449	1459	1491	-1346	1429
1573	-1387	-1520	1550	-1197	1235	-1164	1190	1519	-1598	1573	-1682	1190	1492	-1345	1430
1574	-1386	-1519	1551	-1196	1236	-1163	1191	-1641	-1597	1574	-1681	1191	1493	-1344	1431
1575	-1385	-1518	-1372	-1195	-1520	-1162	-1300	-1640	-1596	1575	-1300	-1300	1494	-1343	1432
1576	-1384	-1517	-1371	-1194	-1358	-1161	-1299	-1639	-1595	1576	-1299	-1299	1495	-1342	1433
1577	-1383	-1516	-1370	-1193	1212	-1160	-1212	-1638	-1594	1577	-1298	-1298	1496	-1341	1434
1578	-1382	-1515	-1369	-1192	-1264	-1159	1763	-1637	-1593	1578	-1297	-1297	1497	-1340	1435
1579	-1381	-1514	-1368	-1191	-1404	-1158	1764	-1636	-1592	1579	-1296	-1296	1498	-1339	1436
1580	-1380	-1513	-1367	-1190	-1403	-1514	1765	-1635	-1591	1580	-1295	-1295	1499	-1426	1437
1581	-1379	-1512	-1366	-1189	-1325	-1513	1766	-1634	-1590	1581	-1294	-1294	1500	-1425	1231
1582	-1378	-1511	-1365	-1356	-1402	-1512	1767	1415	-1589	1582	-1293	-1293	1501	-1627	1232
1583	-1377	-1510	-1364	-1355	-1155	-1451	-1202	1416	-1588	1583	-1292	-1292	1322	-1626	1233
1584	-1376	-1509	-1257	-1354	1655	-1450	-1201	-1417	-1587	1584	1540	1540	1323	-1625	1234
1585	-1375	1663	-1281	-1353	1438	-1465	-1200	1418	-1586	1585	1541	1541	1324	-1624	1235
1586	-1374	1664	1282	1574	1177	-1464	-1199	1419	-1585	1586	-1365	-1365	1326	-1623	1236
1587	-1373	1665	1283	1575	1178	-1463	-1198	-1437	-1584	1587	-1364	-1364	1327	-1622	-1520
1588	-1372	1666	1284	1576	1179	-1462	-1197	-1436	-1583	1588	-1175	-1175	1328	-1621	-1519
1589	-1371	1667	1285	1577	-1180	1573	-1196	-1435	-1582	1589	-1174	-1174	1329	-1620	-1518
1590	-1370	1668	1286	1578	1181	1574	-1195	-1434	-1581	1590	1173	1173	-1532	-1619	-1517
1591	-1369	1669	1287	1579	1182	1575	-1260	-1433	-1580	1591	-1172	-1172	-1531	-1618	-1516
1592	-1368	1670	1288	1580	-1489	1576	-1259	-1432	-1579	1592	-1171	-1171	-1530	1553	-1515
1593	-1367	1671	1289	1581	-1431	1577	-1618	-1431	-1578	1593	1529	1529	-1529	1554	-1514
1594	-1366	1672	1397	1429	-1430	-1578	1553	-1430	-1577	1594	1530	1530	-1528	1555	-1513
1595	-1365	1673	1398	-1430	-1429	1579	1554	-1429	-1576	1595	1531	1531	-1527	1556	-1512
1596	-1364	1674	1399	1427	-1427	1580	1555	-1428	-1575	1596	1277	1277	-1526	1557	-1511
1597	-1363	1675	1400	1428	1428	1581	1556	-1427	-1574	1597	-1287	-1287	-1525	1558	-1510
1598	-1362	1676	1401	1431	-1229	1582	1557	-1229	-1573	1598	-1286	-1286	-1524	1559	-1423
1599	-1361	-1490	1402	1432	-1228	1583	-1677	-1228	-1572	1599	-1285	-1285	-1523	1560	-1422
1600	-1360	-1489	1403	-1210	-1227	1584	-1676	-1227	-1571	1600	-1284	-1284	-1522	1280	-1421
1601	-1359	-1488	1404	-1209	-1226	1585	-1675	-1226	-1570	1601	1444	1444	-1521	-1281	-1420
1602	-1358	-1487	1405	-1208	1266	1586	-1674	-1225	-1569	1602	-1291	-1291	-1520	1282	-1419
1603	-1357	-1486	-1739	-1207	1267	1494	-1673	-1224	-1568	1603	1752	1752	-1519	1283	-1418
1604	-1356	-1485	-1738	-1317	1456	-1629	-1672	-1223	-1567	1604	-1219	-1219	-1518	1284	1417
1605	-1355	-1484	-1737	-1316	-1289	-1692	1469	-1222	-1566	1605	-1218	-1218	-1517	1285	-1416
1606	-1354	-1483	-1736	-1315	-1288	-1691	1470	-1221	-1565	1606	-1217	-1217	-1516	1286	-1415
1607	-1353	-1482	-1735	-1380	1619	-1690	1471	-1220	-1564	1607	-1216	-1216	-1515	1287	-1414
1608	-1352	-1481	-1734	-1243	-1599	-1689	1472	1592	-1563	1608	-1215	-1215	-1514	1288	-1413
1609	-1351	-1480	-1733	-1242	-1598	-1688	1473	-1593	-1562	1609	-1214	-1214	-1513	1289	-1412
1610	-1350	-1479	-1732	-1241	-1597	-1687	-1598	1594	-1561	1610	-1213	-1213	-1512	1397	-1411
1611	-1349	-1478	-1731	-1240	-1410	-1686	-1597	-1595	-1560	1611	-1212	-1212	-1511	1398	-1410
1612	-1348	-1477	-1730	-1239	-1409	-1685	-1410	1596	-1559	1612	1763	1763	-1510	1399	-1409
1613	-1347	-1476	-1729	1266	-1408	1654	1216	1467	-1558	1613	1764	1764	-1423	1400	-1408
1614	-1346	-1475	-1728	1233	-1678	1655	1217	1468	-1557	1614	1765	1765	-1422	1401	-1678
1615	-1345	-1474	-1727	1234	-1677	-1566	1218	-1539	-1556	1615	1766	1766	-1421	1402	-1677
1616	-1344	-1473	-1726	1235	-1676	-1565	1219	-1538	-1555	1616	1767	1767	-1420	1403	-1676
1617	-1343	-1472	-1725	1236	-1675	1484	-1752	-1537	-1554	1617	-1202	-1202	-1419	1404	-1675
1618	-1342	-1471	-1724	1526	-1674	1485	1291	-1536	-1553	1618	-1201	-1201	-1418	1405	-1674
1619	-1341	-1470	-1723	1237	-1673	1486	-1444	-1535	-1552	1619	-1200	-1200	1417	1406	-1673
1620	-1340	-1469	-1722	1238	-1672	1487	1284	-1534	-1551	1620	-1199	-1199	-1416	1407	-1672
1621	-1339	-1468	-1721	-1265	1469	1488	1285	-1533	-1550	1621	-1198	-1198	-1415	1408	1469
1622	-1338	-1467	-1720	1348	1459	-1360	1286	1330	-1549	1622	-1197	-1197	-1414	1409	1470
1623	-1337	-1466	-1719	1349	-1665	-1359	1287	1331	-1548	1623	-1196	-1196	-1413	1410	1471
1624	-1336	-1465	-1718	1350	-1664	-1358	-1277	1332	-1547	1624	-1195	-1195	-1412	1411	1472
1625	-1335	-1464	-1717	1314	1670	1490	-1531	1333	-1546	1625	-1260	-1260	-1411	1412	1473
1626	-1334	-1463	-1716	1268	1671	1491	-1530	1334	-1545	1626	-1259	-1259	-1410	1413	1474
1627	-1333	-1462	-1715	1269	1445	-1524	-1529	-1335	-1544	1627	-1618	-1618	-1409	1414	1779
1628	1332	-1461	-1714	1367	-1772	1784	1171	1336	-1543	1628	1553	1553	-1408	1415	1780
1629	-1331	-1460	-1713	-1335	-1771	1788	1172	-1390	-1542	1629	1554	1554	-1678	1416	1781
1630	-1330	-1459	-1712	1336	-1770	-1244	-1173	-1389	-1541	1630	1555	1555	-1677	1417	1782
1631	-1329	-1458	-1711	-1390	-1769	-1787	1174	-1388	-1540	1631	1556	1556	-1676	1418	1783
1632	-1328	-1457	-1347	-1389	-1768	1786	1175	-1387	-1539	1632	1557	1557	-1675	1419	-1483
1633	-1327	-1456	-1346	-1388	1601	-1785	1364	-1168	-1538	1633	-1677	-1677	-1674	1420	-1482
1634	-1326	-1455	-1345	-1387	1504	1397	1365	-1167	-1537	1634	-1676	-1676	-1673	1421	1624
1635	-1325	-1454	-1344	-1386	-1318	1398	-1541	-1322	-1536	1635	-1675	-1675	-1672	1422	1625
1636	-1324	-1453	-1343	1606	-1317	1399	-1540	-1501	-1535	1636	-1674	-1674	1469	1423	1626
1637	-1323	-1452	-1342	1255	-1503	1400	1292	-1500	-1534	1637	-1673	-1673	1470	1510	1627
1638	-1322	-1451	-1341	1256	-1502	1631	1293	-1499	-1533	1638	-1672	-1672	1471	1511	1402
1639	-1321	-1450	-1340	1257	1340	1380	1294	1525	-1532	1639	1469	1469	1472	1512	1325
1640	-1320	-1449	-1339	1364	1709	1381	1295	1526	-1531	1640	1470	1470	1473	1513	1403
1641	-1319	-1448	-1426	1365	-1451	-1632	1296	-1762	-1530	1641	1471	1471	1474	1514	1404
1642	-1318	-1447	-1425	1366	-1346	-1243	1297	1761	-1529	1642	1472	1472	1475	1515	1405
1643	-1317	-1446	-1627	-1659	-1510	-1242	1298	-1760	-1528	1643	1473	1473	1476	1516	1406
1644	-1316	-1445	-1626	-1658	1511	-1241	1213	-1759	-1527	1644	-1598	-1598	1477	1517	1407
1645	-1315	-1444	-1625	-1657	1512	-1240	1214	-1758	-1526	1645	-1597	-1597	1478	1518	1679
1646	-1314	-1443	-1624	-1656	1513	-1239	1215	1757	-1525	1646	-1410	-1410	1479	1519	1680
1647	-1313	-1442	-1623	1441	1617	-1238	-1409	-1756	-1524	1647	-1409	-1409	1480	1520	1681
1648	-1312	-1441	-1622	-1152	-1552	1182	-1408	-1755	-1523	1648	-1408	-1408	1481	1521	1682
1649	-1311	1653	-1621	1426	1345	-1489	-1678	-1754	-1522	1649	-1678	-1678	1482	1522	-1449
1650	-1310	1654	-1620	1633	-1651	-1778	1558	-1753	-1521	1650	1558	1558	1483	1523	-1448
1651	-1309	1655	-1619	1634	-1649	-1777	1559	-1684	-1520	1651	1559	1559	-1783	1524	-1447
1652	-1308	1656	-1618	1635	-1495	-1776	1560	-1683	-1519	1652	1560	1560	-1782	1525	1548
1653	-1307	1657	1553	1636	1496	-1775	1543	1450	-1518	1653	1543	1543	-1781	1526	1549
1654	-1306	1658	1554	1637	1748	-1774	-1230	1451	-1517	1654	-1230	-1230	-1780	1527	1550
1655	-1305	1659	-1293	1638	1747	-1773	-1338	1512	-1516	1655	-1338	-1338	-1779	1528	1551
1656	-1304	1660	-1292	1639	1746	-1279	-1337	1513	-1515	1656	-1337	-1337	-1778	1529	1206
1657	-1303	1661	1540	1640	1741	-1278	-1546	1514	-1514	1657	-1546	-1546	-1777	1530	1207
1658	-1302	1662	1541	1641	1742	-1262	-1545	1158	-1513	1658	-1545	-1545	-1776	1531	1208
1659	-1301	-1508	1542	1642	1743	-1261	-1544	1159	-1512	1659	-1544	-1544	-1775	1532	1209
1660	-1300	-1507	1543	1643	1744	-1702	-1154	1160	-1511	1660	-1154	-1154	-1774	-1329	1210
1661	-1299	-1506	1544	1644	1745	-1628	1153	1161	-1510	1661	1153	1153	-1773	-1328	1211
1662	-1298	-1505	1464	1645	1736	1669	1442	1162	-1509	1662	1442	1442	-1279	-1327	1212
1663	-1297	-1504	1465	1646	1737	1670	1443	1163	1663	1663	1443	1443	-1278	-1326	1213
1664	1036	-1503	1466	1647	1738	1671	-1283	1164	1664	1664	-1283	-1283	-1277	-1325	1214
1665	1037	-1502	1597	1626	1739	1445	1276	1165	1665	1665	1276	1276	-1276	-1324	1215
1666	1038	-1501	1598	1627	1740	-1772	1532	-1323	1666	1666	1532	1532	-1459	-1323	1216
1667	1039	-1500	1599	1671	1734	-1771	-1521	-1166	1667	1667	-1521	-1521	-1458	-1322	1217
1668	1040	-1499	1600	1445	1735	-1770	-1249	1324	1668	1668	-1249	-1249	-1457	-1501	1218
1669	1041	-1498	1601	-1772	-1733	-1769	-1248	1326	1669	1669	-1248	-1248	-1456	-1500	1219
1670	1042	-1497	1602	1267	-1751	-1205	-1247	1327	1670	1670	-1247	-1247	-1455	-1499	-1752
1671	1043	-1496	1603	1393	-1240	-1204	-1246	-1709	1671	1671	-1246	-1246	-1454	-1498	1291
1672	1044	-1495	1604	-1303	1280	-1203	-1245	-1708	1672	1672	-1245	-1245	-1453	-1497	-1444
1673	1673	-1494	1605	-1302	-1281	1768	-1379	-1707	1673	1673	-1379	-1379	-1452	-1496	-1443
1674	1674	-1493	1606	-1301	1282	-1372	-1378	-1706	1674	1674	-1378	-1378	-1451	-1495	-1442
1675	1675	-1492	1607	-1300	1283	-1371	-1377	1452	1675	1675	-1377	-1377	-1450	-1494	-1153
1676	1676	-1491	1608	-1299	1284	-1370	-1376	1453	1676	1676	-1376	-1376	1683	-1493	1154
1677	1677	1677	1242	-1298	1460	-1369	-1250	1268	1677	1677	-1250	-1250	1684	-1492	-1230
1678	1678	1678	1243	-1297	1274	-1368	1542	1269	1678	1678	1542	1542	1685	-1491	-1338
1679	1679	1679	1244	-1296	1275	-1367	1280	1270	1679	1679	1280	1280	1686	-1490	-1337
1680	1680	1680	1245	-1295	1550	-1550	-1281	1271	1680	1680	-1281	-1281	1687	-1489	-1546
1681	1681	1681	1246	-1294	1551	-1549	1282	-1307	1681	1681	1282	1282	1688	-1488	-1545
1682	1682	1682	1247	1402	1206	-1548	-1253	-1493	1682	1682	1548	1548	1689	-1487	-1544
1683	1683	1683	1248	1325	1207	-1282	1178	-1498	1683	1683	1549	1549	1690	-1486	-1543
1684	1684	1684	1249	1403	1209	1281	1179	-1497	1684	1684	1550	1550	1691	-1485	-1542
1685	1685	1685	1250	1457	1210	-1280	-1180	-1290	1685	1685	1367	1367	1692	-1484	1250
1686	1686	1686	1251	1523	1290	-1542	1181	-1396	1686	1686	1368	1368	1629	-1483	1251
1687	1687	1687	-1185	1524	1390	1250	1182	-1395	1687	1687	1369	1369	1630	-1482	1252
1688	1688	1688	-1184	1525	1535	1376	-1489	1492	1688	1688	1370	1370	1631	-1481	1253
1689	1689	1689	-1183	1527	1335	1377	-1778	-1394	1689	1689	1371	1371	1632	-1480	1254
1690	1690	1690	-1182	1528	-1334	1378	-1777	-1393	1690	1690	1372	1372	1633	-1479	-1523
1691	1691	1691	-1181	1529	-1333	1379	-1776	-1392	1691	1691	-1768	-1768	1634	-1478	-1522
1692	1692	1692	1180	1501	-1332	1245	-1775	-1391	1692	1692	1203	1203	1635	-1477	-1521
1693	1693	1693	-1179	1322	-1331	1246	-1774	1547	1693	1693	1204	1204	1636	-1476	1607
1694	1694	1694	1585	1323	-1162	1247	-1773	-1446	1694	1694	1205	1205	1637	-1475	1608
1695	1695	1695	1586	1324	1161	1248	-1279	-1374	1695	1695	1769	1769	1638	-1474	1609
1696	1696	1696	1587	1326	-1160	-1738	-1278	-1373	1696	1696	1770	1770	1639	-1473	1610
1697	1697	1697	1588	1327	-1159	-1729	-1262	1157	1697	1697	1771	1771	1640	-1472	1611
1698	1698	1698	1589	1328	-1158	-1728	-1261	-1569	1698	1698	1772	1772	1641	-1471	1612
1699	1699	1699	1590	1273	-1157	1727	-1702	-1568	1699	1699	-1445	-1445	1642	-1470	1613
1700	1700	1700	1591	1460	1373	-1732	-1628	-1343	1700	1700	-1671	-1671	1643	-1469	1614
1701	1701	1701	1592	1274	-1374	1740	1669	-1342	1701	1701	-1670	-1670	1644	1672	-1303
1702	1702	1702	1593	-1769	1375	-1747	1670	-1340	1702	1702	-1669	-1669	1645	1673	-1302
1703	1703	1703	1594	-1768	-1187	1733	1671	-1339	1703	1703	1628	1628	1646	1674	-1301
1704	1704	1704	1595	-1767	-1186	-1496	1445	-1426	1704	1704	1702	1702	1647	1675	-1191
1705	1705	1705	1596	-1766	-1185	-1495	-1772	-1425	1705	1705	1261	1261	1648	1676	-1190
1706	1706	1706	1467	-1765	-1184	1630	-1771	-1401	1706	1706	1262	1262	1649	1677	-1189
1707	1707	1707	1468	-1764	-1183	1382	-1770	1633	1707	1707	1278	1278	1650	1678	-1188
1708	1708	1708	-1539	1168	1490	1383	-1769	-1414	1708	1708	1279	1279	1651	1679	1376
1709	1709	1709	-1538	1169	1491	-1384	-1205	-1413	1709	1709	1773	1773	1652	1680	1377
1710	1710	1710	-1537	1170	1492	1385	-1204	-1412	1710	1710	1774	1774	1653	1681	1378
1711	1711	1711	-1536	-1363	1493	1341	-1203	-1411	1711	1711	1775	1775	1654	1682	1379
1712	1712	1712	-1535	1351	1494	1561	1768	-1466	1712	1712	1776	1776	1655	1683	1245
1713	1713	1713	-1534	1352	-1629	1562	-1372	-1465	1713	1713	1777	1777	-1566	1684	1246
1714	1714	1714	-1533	1455	-1692	1563	-1371	-1464	1714	1714	1778	1778	-1565	1685	1247
1715	1715	1715	1330	1456	-1691	1564	-1370	-1463	1715	1715	1489	1489	1484	1686	1248
1716	1716	1716	1331	1404	-1690	1237	-1369	-1462	1716	1716	-1182	-1182	1485	1687	1249
1717	1717	1717	1332	1405	1689	-1181	-1368	1573	1717	1717	-1181	-1181	1486	1688	-1541
1718	1718	1718	1333	1406	-1688	1180	-1367	1574	1718	1718	1180	1180	1487	1689	-1540
1719	1719	1719	1334	1407	1687	-1179	-1550	1575	1719	1719	-1179	-1179	1488	1690	1292
1720	1720	1720	1335	1679	-1686	-1178	-1549	1576	1720	1720	-1178	-1178	-1360	1691	1293
1721	1721	1721	1336	1680	-1685	1253	-1548	1577	1721	1721	1253	1253	-1359	1692	1294
1722	1722	1722	1337	1681	-1684	1254	1254	-1578	1722	1722	1254	1254	-1358	1629	1295
1723	1723	1723	1338	1607	-1683	-1209	-1523	1579	1723	1723	-1523	-1523	1704	1630	1296
1724	1724	1724	1427	1608	1450	-1208	-1522	1580	1724	1724	-1522	-1522	1705	1631	1297
1725	1725	1725	1428	1609	-1447	1438	-1329	1581	1725	1725	-1329	-1329	1706	1632	1298
1726	1726	1726	1429	1610	1548	1439	-1328	1582	1726	1726	-1328	-1328	1707	1633	1299
1727	1727	1727	1430	1611	-1168	1440	-1156	1583	1727	1727	-1156	-1156	1708	1634	1300
1728	1728	1728	1431	1612	-1167	1441	-1155	1584	1728	1728	-1155	-1155	1709	1635	1192
1729	1729	1729	1432	1613	-1166	-1152	1438	1585	1729	1729	1438	1438	-1570	1636	1193
1730	1730	1730	1433	1614	1165	1151	1439	1586	1730	1730	1439	1439	-1569	1637	1194
1731	1731	1731	1434	1615	-1587	-1680	1440	1494	1731	1731	1440	1440	-1568	1638	1195
1732	1732	1732	1435	1616	-1170	-1657	1441	-1629	1732	1732	1441	1441	-1343	1639	1196
1733	1733	1733	1436	1617	1588	1661	-1152	-1692	1733	1733	-1152	-1152	1342	1640	1197
1734	1734	1734	1437	-1583	1589	-1699	1151	-1691	1734	1734	1151	1151	-1341	1641	1198
1735	1735	1735	1438	-1683	1393	-1698	-1680	-1690	1735	1735	-1680	-1680	-1340	1642	1199
1736	1736	1736	-1657	1450	1394	-1476	-1657	-1689	1736	1736	-1657	-1657	-1339	1643	1200
1737	1737	1737	-1656	1451	1395	-1475	1661	-1688	1737	1737	1661	1661	-1426	1644	1201
1738	1738	1738	1567	1452	1421	1361	-1699	-1687	1738	1738	-1699	-1699	-1425	1645	1202
1739	1739	1739	1568	1160	1422	1362	-1698	-1686	1739	1739	-1698	-1698	-1401	1646	-1767
1740	1740	1740	1569	1161	1423	-1313	-1476	-1685	1740	1740	-1476	-1476	-1400	1647	-1766
1741	1741	1741	1570	1162	1652	-1312	-1475	1654	1741	1741	-1475	-1475	-1399	1648	-1765
1742	1742	1742	1571	1163	1653	-1311	1361	1655	1742	1742	1361	1361	-1398	1649	-1764
1743	1743	1743	1223	1164	1654	-1551	1362	-1566	1743	1743	1362	1362	-1397	1650	-1763
1744	1744	1744	1224	-1165	-1566	-1267	-1313	-1565	1744	1744	-1313	-1313	-1289	1651	-1459
1745	1745	1745	1225	1166	-1432	-1266	-1312	-1485	1745	1745	-1312	-1312	-1288	1652	-1458
1746	1746	1746	1226	1167	-1261	-1265	-1311	1484	1746	1746	-1311	-1311	-1287	1653	-1457
1747	1747	1747	1227	-1763	1782	1348	-1551	1486	1747	1747	-1551	-1551	-1286	1654	-1456
1748	1748	1748	1228	-1762	1483	1349	-1267	1487	1748	1748	-1267	-1267	-1285	1655	-1455
1749	1749	1749	1229	-1761	-1164	1350	-1266	1488	1749	1749	-1266	-1266	-1284	-1566	-1454
1750	1750	1750	1230	-1760	-1163	1314	-1265	-1360	1750	1750	-1265	-1265	-1283	-1565	-1314
1751	1751	1751	1231	-1759	-1330	-1779	1348	1564	1751	1751	1348	1348	-1282	-1564	-1350
1752	1752	1752	1232	-1758	1533	-1474	1349	1237	1752	1752	1349	1349	1281	-1563	-1349
1753	1753	1753	1233	-1757	-1536	1599	1350	1238	1753	1753	1350	1350	-1280	1785	-1348
1754	1754	1754	1234	-1756	1336	1600	1314	1239	1754	1754	1314	1314	-1560	1786	1265
1755	1755	1755	1235	-1755	-1534	1601	-1779	1240	1755	1755	-1779	-1779	-1559	1787	1266
1756	1756	1756	1236	-1754	1537	1602	-1474	1241	1756	1756	-1474	-1474	-1558	-1788	1267
1757	1757	1757	1237	-1753	-1538	1603	1599	1242	1757	1757	1599	1599	-1557	-1784	1315
1758	1758	1758	1238	1458	1616	1604	1600	1243	1758	1758	1600	1600	-1556	-1783	1316
1759	1759	1759	1239	1459	-1299	1605	1601	1632	1759	1759	1601	1601	-1555	-1782	1317
1760	1760	1760	1240	-1311	-1298	1606	1602	-1381	1760	1760	1602	1602	-1554	-1781	1318
1761	1761	1761	-1319	-1310	1300	1255	1603	-1380	1761	1761	1603	1603	-1553	-1780	1319
1762	1762	1762	-1318	-1309	1352	1256	1604	-1631	1762	1762	1604	1604	1618	-1779	1320
1763	1763	1763	-1317	-1308	-1191	1257	1605	-1400	1763	1763	1605	1605	1619	-1778	1321
1764	1764	1764	-1316	-1454	-1199	1176	1606	-1399	1764	1764	1606	1606	1620	-1777	1502
1765	1765	1765	-1315	-1453	1202	1177	1255	-1398	1765	1765	1255	1255	1621	-1776	1503
1766	1766	1766	-1314	-1159	-1767	-1252	1256	-1397	1766	1766	1256	1256	1622	-1775	1504
1767	1767	1767	-1313	-1488	-1766	-1251	1257	1785	1767	1767	1257	1257	1623	-1774	1505
1768	1768	1768	-1312	1487	1763	1188	1176	-1786	1768	1768	1176	1176	1624	-1773	1506
1769	1769	1769	-1311	-1486	1764	1189	1177	1787	1769	1769	1177	1177	1625	-1279	1507
1770	1770	1770	-1310	-1485	1524	1447	-1252	1244	1770	1770	-1252	-1252	1626	-1278	1508
1771	1771	1771	-1309	-1484	1525	1310	-1251	-1788	1771	1771	-1251	-1251	1627	-1277	1509
1772	1772	1772	-1308	1565	1526	1206	1188	-1784	1772	1772	1188	1188	1402	-1276	1424
1773	1773	1773	-1352	1566	-1762	1207	1189	1524	1773	1773	1189	1189	1325	-1459	1628
1774	1774	1774	-1351	-1655	1761	1155	-1209	-1491	1774	1774	1447	-1209	1403	-1458	1693
1775	1775	1775	-1350	-1654	-1760	1156	-1208	-1490	1775	1775	1310	-1208	1404	-1457	-1695
1776	1776	1776	-1349	-1653	1759	1328	-1207	1358	1776	1776	1206	-1207	1405	-1456	-1700
1777	1777	1777	-1348	-1652	-1758	1329	-1206	1359	1777	1777	1207	-1206	1406	-1455	-1699
1778	1778	1778	-1710	-1651	-1757	1522	-1310	-1563	1778	1778	1208	-1310	1407	-1454	-1698
1779	1779	1779	-1709	-1650	-1756	1523	-1447	-1562	1779	1779	1209	-1447	1679	-1453	-1697
1780	1780	1780	-1708	-1649	1647	1703	1703	1561	1780	1780	1703	1703	1680	-1452	-1696
1781	1781	1781	-1707	-1648	1648	-1264	-1264	-1382	1781	1781	-1264	-1264	1681	-1451	1694
1782	1782	1782	-1706	-1625	1433	-1263	-1263	-1630	1782	1782	-1263	-1263	1682	-1450	1701
1783	1783	1783	-1705	-1624	-1434	-1258	-1258	1495	1783	1783	-1258	-1258	-1449	-1449	1702
1784	1784	1784	-1704	-1448	1435	-1363	-1363	1496	1784	1784	-1363	-1363	-1448	-1448	1703
1785	1785	1785	1265	-1447	1436	1351	1351	1385	1785	1785	1351	1351	-1447	-1447	-1264
1786	1786	1786	1266	-1446	-1437	1352	1352	1341	1786	1786	1352	1352	-1446	-1446	-1263
1787	1787	1787	1267	1561	1231	1308	1308	1383	1787	1787	1308	1308	1561	1561	-1262
1788	1788	1788	1268	1562	1765	1309	1309	-1384	1788	1788	1309	1309	1562	1562	-1261
C-telo	C-telo	C-telo	C-telo	C-telo	C-telo	C-telo	C-telo	C-telo	C-telo	C-telo	C-telo	C-telo	C-telo	C-telo	C-telo
D-telo	D-telo	D-telo	D-telo	D-telo	D-telo	D-telo	D-telo	D-telo	D-telo	D-telo	D-telo	D-telo	D-telo	D-telo	D-telo
1789	1789	1789	1800	1870	1796	-1798	1855	-1798	1789	1789	-1798	-1798	1796	1796	1796
1790	1790	1790	1801	-2023	1797	1823	1856	1823	1790	1790	1823	1823	1797	1797	1797
1791	1791	1791	1802	-2022	-1823	-1797	2186	-1797	1791	1791	-1797	-1797	-1823	-1823	-1823
1792	1792	1792	-1803	2017	1798	-1796	-1950	-1796	1792	1792	-1796	-1796	1798	1798	1798
1793	1793	1793	-1789	2018	2189	1790	-1949	1790	1793	1793	1790	1790	-1795	-1795	-1795
1794	1794	1794	1799	2019	-2190	1791	-1948	1891	1794	1794	1791	1791	-1794	-1794	2187
1795	1795	1795	1863	2020	2191	1891	-2206	-1866	1795	1795	1891	1891	-1793	-1793	2188
1796	1796	1796	1864	2021	-2027	-1866	-2199	1845	1796	1796	-1866	-1866	-1817	-1792	2189
1797	1797	1797	1865	-2016	-2026	1845	-2205	1846	1797	1797	1845	1845	-1816	-1791	2190
1798	1798	1798	1866	2322	-2025	1846	-2204	1847	1798	1798	1846	1846	-1815	-1790	2191
1799	1799	1799	-1793	2323	-2024	1847	-2203	1848	1799	1799	1847	1847	-1814	-1789	2192
1800	1800	1800	-1792	1966	1871	1848	-2202	-1849	1800	1800	1848	1848	-1813	1799	2193
1801	1801	1801	-1791	-2333	-1872	1849	1917	-1850	1801	1801	1849	1849	-1812	1800	2194
1802	1802	1802	-1790	-2002	1873	1850	-1834	1851	1802	1802	1850	1850	-1811	1801	2195
1803	1803	1803	-1862	-2001	1874	1851	-1833	1898	1803	1803	1851	1851	1903	1802	2196
1804	1804	1804	-1861	-2000	1875	1898	-1806	1899	1804	1804	1898	1898	1904	1803	2197
1805	1805	1805	-1860	-1999	1920	1899	-1805	1900	1805	1805	1899	1899	-2054	1804	2198
1806	1806	1806	-1859	-1998	-1888	1900	-1804	1901	1806	1806	1900	1900	-2053	1805	2206
1807	1807	1807	-1858	-1997	-1807	1901	-1803	1886	1807	1807	1901	1901	-2052	1806	2207
1808	1808	1808	-1857	-1996	-1832	1886	-1802	1887	1808	1808	1886	1886	-2051	1833	2208
1809	1809	1809	-1856	-2010	2213	1887	1800	1888	1809	1809	1887	1887	-1838	1834	2209
1810	1810	1810	-1855	1954	2028	1888	1801	-1920	1810	1810	1888	1888	-1837	1835	2210
1811	1811	1811	-1854	1955	-2032	-1920	-1799	-1919	1811	1811	-1920	-1920	-1836	1836	2211
1812	1812	1812	-1853	1956	-2031	-1919	1789	-1918	1812	1812	-1919	-1919	-1835	1837	2212
1813	1813	1813	-1852	1957	2035	-1918	1792	1877	1813	1813	-1918	-1918	-1834	1838	-1831
1814	1814	1814	-1851	1958	2036	1877	1818	1878	1814	1814	1877	1877	-1833	1839	-1830
1815	1815	1815	-1850	1959	2037	1878	1819	1815	1815	1815	1878	1878	-1806	1840	-1829
1816	1816	1816	-1849	1800	-2030	1815	1820	1816	1816	1816	1815	1815	-1805	1841	-1828
1817	1817	1817	-1848	-1833	-2062	1816	1821	1817	1817	1817	1816	1816	-1804	1842	-1827
1818	1818	1818	-1847	-1806	2224	1817	-2043	1793	1818	1818	1817	1817	-1803	1843	-1826
1819	1819	1819	-1846	-1805	1845	1793	-1875	1794	1819	1819	1793	1793	-1802	1844	-1825
1820	1820	1820	-1845	-1804	1846	1794	1996	1951	1820	1820	1794	1794	-1801	1845	-1824
1821	1821	1821	-1844	-1803	1848	1951	1997	-2317	1821	1821	1951	1951	-1800	1846	-1822
1822	1822	1822	-1843	-1802	1805	-2317	1998	2022	1822	1822	-2317	-2317	-1799	1847	-1821
1823	1823	1823	-1842	-1801	-2093	2022	1999	1962	1823	1823	2022	2022	1789	1848	-1820
1824	1824	1824	-2103	1834	1967	1962	2000	-1795	1824	1824	1962	1962	1790	1849	-1819
1825	1825	1825	-2102	1835	1968	-1795	2001	2187	1825	1825	-1795	-1795	1791	1850	-1818
1826	1826	1826	-2101	1992	1943	2187	-1975	2188	1826	1826	2187	2187	1792	1851	-1792
1827	1827	1827	-2100	1993	1944	2188	-1974	2189	1827	1827	2188	2188	1818	1852	-1789
1828	1828	1828	-2099	1994	-1945	2189	-1844	2190	1828	1828	2189	2189	1819	1853	1799
1829	1829	1829	-2098	1995	1946	2190	-1843	2191	1829	1829	2190	2190	1820	1854	1800
1830	1830	1830	-2097	1921	1947	2191	-1842	2192	1830	1830	2191	2191	1821	1855	1801
1831	1831	1831	-2096	1922	-1977	2192	-1841	2193	1831	1831	2192	2192	1822	1856	1802
1832	1832	1832	-2095	1923	-1976	2193	-1889	2194	1832	1832	2193	2193	1824	1857	1803
1833	1833	1833	-2094	1924	1975	2194	2219	-2195	1833	1833	2194	2194	1825	1858	1804
1834	1834	1834	-2093	1925	-1974	-2195	1939	2196	1834	1834	-2195	-2195	1826	1859	1805
1835	1835	1835	1967	1926	-2326	2196	1940	2197	1835	1835	2196	2196	1827	1860	1806
1836	1836	1836	1968	-1869	-1809	2197	-2031	2198	1836	1836	2197	2197	1828	1861	1833
1837	1837	1837	1969	-1868	-1808	2198	2038	2200	1837	1837	2198	2198	1829	1862	1834
1838	1838	1838	1970	1867	2015	2200	-1914	-2020	1838	1838	2200	2200	1830	1863	1835
1839	1839	1839	1971	2029	-1886	-2020	-1913	-2019	1839	1839	-2020	-2020	1831	1864	1836
1840	1840	1840	-1867	2030	-1901	-2019	-1912	-2018	1840	1840	-2019	-2019	-2212	1865	-1837
1841	1841	1841	1901	-2028	-1900	-2018	-1911	2049	1841	1841	-2018	-2018	-2211	1866	1838
1842	1842	1842	1902	-2027	2281	2049	-1910	2050	1842	1842	2049	2049	-2210	-1867	2051
1843	1843	1843	-1810	-2026	-2278	2050	-1909	2316	1843	1843	2050	2050	-2209	1868	2052
1844	1844	1844	-1837	-2025	-2092	2316	-1908	-2021	1844	1844	2316	2316	-2208	1869	2053
1845	1845	1845	-1836	-2024	2284	-2021	1907	1906	1845	1845	-2021	-2021	-2207	1870	2054
1846	1846	1846	-1835	-1943	2194	1906	-1906	-1907	1846	1846	2201	2201	-2206	1871	-1904
1847	1847	1847	-1834	-2036	2195	-1907	-2201	1908	1847	1847	1906	1906	-2205	1872	-1903
1848	1848	1848	-1833	-2089	2196	1908	2021	1909	1848	1848	-1907	-1907	-2204	1873	1811
1849	1849	1849	-1806	2011	-2197	1909	-2316	-1911	1849	1849	1908	1908	-2203	1874	1813
1850	1850	1850	-1805	2012	2198	1910	-2050	-1910	1850	1850	1909	1909	-2202	1875	1814
1851	1851	1851	-1804	2013	1883	1911	-2049	1912	1851	1851	1910	1910	-2201	1876	1815
1852	1852	1852	1796	2037	2013	1912	2018	1913	1852	1852	1911	1911	-2200	1877	1816
1853	1853	1853	1797	-2206	2014	1913	2019	1914	1853	1853	1912	1912	-2199	1878	1817
1854	1854	1854	-1823	-2205	-1969	1914	2020	-2038	1854	1854	1913	1913	-2198	1879	1793
1855	1855	1855	1798	-2204	-2045	-2038	-2200	2031	1855	1855	1914	1914	-2197	1880	1794
1856	1856	1856	-1795	-2203	2363	2031	-2198	-1940	1856	1856	-2038	-2038	-2196	1881	-2186
1857	1857	1857	1913	-1913	2364	-1940	-2197	-1939	1857	1857	2031	2031	-2195	1882	1985
1858	1858	1858	1914	-1912	2365	-1939	-2196	-2219	1858	1858	-1940	-1940	-2194	1883	1986
1859	1859	1859	1915	-1911	2366	-2219	2195	1889	1859	1859	-1939	-1939	-2193	1884	1987
1860	1860	1860	1916	-1910	-2367	1889	-2194	1841	1860	1860	-2219	-2219	-2192	1885	1988
1861	1861	1861	1917	-1909	2368	1841	-2193	1842	1861	1861	1889	1889	-2191	1886	1989
1862	1862	1862	1918	-1908	2369	1842	-2192	1843	1862	1862	1841	1841	-2190	1887	1990
1863	1863	-2041	1919	-1907	2370	1843	-2191	1844	1863	1863	1842	1842	-2189	1888	1991
1864	1864	-2040	1920	-1906	-2123	1844	-2190	1974	1864	1864	1843	1843	-2188	1889	1992
1865	1865	-2039	1996	-1905	-2122	1974	-2189	1975	1865	1865	1844	1844	-2187	1890	1993
1866	1866	-2038	1997	2055	-2121	1975	-2188	-2001	1866	1866	1974	1974	-2186	1891	1994
1867	1867	-2037	1998	2181	2120	-2001	-2187	-2000	1867	1867	1975	1975	1985	1892	1995
1868	1868	-2036	1999	-2315	-2119	-2000	1795	-1999	1868	1868	-2001	-2001	1986	1893	1921
1869	1869	-2035	2000	-2314	-2118	-1999	-1962	-1998	1869	1869	-2000	-2000	1987	1894	1922
1870	1870	-2034	-2109	-2313	2357	-1998	-2022	-1997	1870	1870	-1999	-1999	1988	1895	1923
1871	1871	-2033	-2108	-2312	-2169	-1997	2317	-1996	1871	1871	-1998	-1998	1989	1896	1924
1872	1872	-2032	-2107	-2311	2044	-1996	-1951	1875	1872	1872	-1997	-1997	1990	1897	1925
1873	1873	-2031	-2106	-2310	2155	1875	-1794	2043	1873	1873	-1996	-1996	1991	1898	1926
1874	1874	-2030	-1977	-2309	2139	2043	-1793	-1820	1874	1874	1875	1875	1992	1899	2321
1875	1875	-2029	2043	-2308	2141	1819	-1817	-1821	1875	1875	2043	2043	1993	1900	1876
1876	1876	-2028	-2042	-2307	2142	-1821	-1816	-1819	1876	1876	-1821	-1821	1994	1901	1877
1877	1877	-2027	-2041	-2306	-2050	-1820	-1815	-1818	1877	1877	-1820	-1820	1995	1902	1878
1878	1878	-2026	-2040	-2335	-2049	-1818	-1878	-1792	1878	1878	-1819	-1819	1921	-1810	1879
1879	1879	-2025	-2039	-2334	-1983	-1792	-1877	-1791	1879	1879	-1818	-1818	1922	-1809	1880
1880	1880	-2024	-2038	-2277	1982	-1789	1918	-1789	1880	1880	-1792	-1792	1923	-1808	2098
1881	-1996	-2023	2031	-2276	-1981	1799	1919	1799	-1996	1881	-1789	-1789	1924	-1807	2099
1882	-1995	-2022	2032	-2275	-1980	-1801	1920	-1801	-1995	1882	1799	1799	1925	-1832	2100
1883	-1994	-2021	2033	-2274	-1979	-1800	-1888	-1800	-1994	1883	-1801	-1801	1926	-1831	2101
1884	-1993	-2020	2034	-2273	2210	1802	-1887	1802	-1993	1884	-1800	-1800	2321	-1830	2102
1885	-1992	-2019	2035	-2272	2211	1803	-1886	1803	-1992	1885	1802	1802	1876	-1829	2103
1886	-1991	-2018	2036	-2271	2323	1804	-1901	-1827	-1991	1886	1803	1803	1877	-1828	2104
1887	-1990	-2017	2037	-2270	2324	1805	-1900	-1826	-1990	1887	1804	1804	1878	-1827	2105
1888	-1989	-2016	-2030	-2269	-1813	1806	-1899	1825	-1989	1888	1805	1805	1879	-1826	2106
1889	-1988	-2015	2351	-2268	-1811	1833	-1898	-1824	-1988	1889	1806	1806	1880	-1825	2107
1890	-1987	-2014	2352	-2267	2114	1834	-1851	-1822	-1987	1890	1833	1833	1881	-1824	-2109
1891	-1986	-2013	2353	-2266	2115	-1917	-1850	-2042	-1986	1891	1834	1834	1882	-1822	-2108
1892	-1985	-2012	2354	2265	-2116	2201	-1849	-2041	-1985	1892	-1917	-1917	1883	-1821	-2110
1893	-1984	-2011	2355	-2264	-2117	2202	-1848	-2040	-1984	1893	2202	2202	1884	-1820	2111
1894	-1983	-2010	2356	-2263	2356	2203	-1847	-2039	-1983	1894	2203	2203	-1973	-1819	2112
1895	-1982	-2009	-2117	-1880	-2355	2204	-1846	1915	-1982	1895	2204	2204	1972	-1818	2113
1896	-1981	-2008	-2153	2132	1956	2205	-1845	-1810	-1981	1896	2205	2205	-1971	-1817	2285
1897	-1980	-2007	-2152	2133	2186	2199	1866	-1809	-1980	1897	2199	2199	-1970	-1816	2222
1898	-1979	-2006	-2151	-2134	-1794	2206	-1891	-1808	-1979	1898	2206	2206	-1969	-1815	-2007
1899	-1978	-2005	-2150	2126	-1793	1948	-1791	2015	-1978	1899	1948	1948	-1968	-1814	-2006
1900	-1977	-2004	-2149	2127	-1817	1949	-1790	2044	-1977	1900	1949	1949	-1967	-1813	-2005
1901	-1976	-2003	-2148	2128	-1816	1950	1796	2045	-1976	1901	1950	1950	2093	-1812	-2004
1902	-1975	-2002	-2147	2130	-1815	-2186	1797	2182	-1975	1902	-2186	-2186	2094	-1811	-2003
1903	-1974	-2001	-2146	-2360	-1814	-1856	-1823	2183	-1974	1903	-1856	-1856	2095	1903	-2332
1904	-1973	-2000	-2145	-2359	1927	-1855	1798	2184	-1973	1904	-1855	-1855	2096	1904	-2331
1905	-1972	-1999	-2144	-1991	1928	-1854	-1853	-2104	-1972	1905	-1854	-1854	2097	-2054	-2330
1906	-1971	-1998	-2286	-1990	1929	-1853	-1852	-2103	-1971	1906	-1853	-1853	2098	-2053	-2329
1907	-1970	-1997	-2248	-1817	-1930	-1852	-1897	-2102	-1970	1907	-1852	-1852	2099	-2052	-2328
1908	-1969	1881	-2247	1816	1931	-1897	-1896	-2101	-1969	1908	-1897	-1897	2100	-2051	-2327
1909	-1968	1882	-2246	-1815	1932	-1896	-1895	-2100	-1968	1909	-1896	-1896	2101	-2050	-2326
1910	-1967	1883	-2245	-1895	-1939	-1895	2332	-2099	-1967	1910	-1895	-1895	2102	-2049	-2325
1911	-1966	1884	-2244	-1894	-1938	2332	2003	-2098	-1966	1911	2332	2332	2103	-2048	-2324
1912	-1965	1885	-2243	-1893	-1937	2003	2004	-1880	-1965	1912	2003	2003	2104	-2047	-2323
1913	-1964	1886	-2242	1891	1936	2004	2005	-1879	-1964	1913	2004	2004	2105	-2046	-2322
1914	-1963	1887	-2241	1892	-1935	2005	2006	-1967	-1963	1914	2005	2005	2106	-2045	2016
1915	-1962	1888	-2240	1960	-1934	2006	2007	2228	-1962	1915	2006	2006	2107	-2044	2017
1916	-2022	1889	-2239	1961	-1941	2007	-2222	2229	-1961	1916	2007	2007	-2109	2043	-2048
1917	-2021	1890	-2238	1962	-1940	-2222	-2221	-1977	-1960	1917	-2222	-2222	-2108	-2042	-2047
1918	-2020	1891	-2237	1963	1933	-2221	-1869	-1976	-1959	1918	-2221	-2221	-2110	-2041	-2046
1919	-2019	1892	-2236	1964	1942	-1869	-1868	2002	-1958	1919	-1869	-1869	2111	-2040	-2045
1920	-2018	1893	2058	1965	1948	-1868	1867	2333	-1957	1920	-1868	-1868	2112	-2039	-2044
1921	-2017	1894	2059	2207	1949	1867	1892	-1966	-1956	1921	1867	1867	2113	-2038	-2015
1922	-2016	1895	2060	2208	-1953	1892	-1890	-1965	-1955	1922	1892	1892	2114	2031	1808
1923	-2015	1896	2061	2209	-1952	-1890	-1840	1964	-1954	1923	-1890	-1890	2115	2032	1809
1924	-2014	1897	2062	2210	-1951	-1840	-1839	-1963	-1953	1924	-1840	-1840	2116	2033	1810
1925	-2013	1898	2063	-2217	-1950	-1839	1978	1893	-1952	1925	-1839	-1839	2117	2034	-1915
1926	-2012	1899	2064	-2216	1954	1978	1979	2230	-1951	1926	1978	1978	-2356	2035	2039
1927	-2011	1900	2065	-2215	1955	1979	-1980	2231	-1950	1927	1979	1979	-2355	2036	2040
1928	-2010	1901	2066	-2214	2085	-1980	1981	2232	-1949	1928	-1980	-1980	-2354	2037	2041
1929	-2009	1902	2067	-2213	2086	1981	1982	2233	-1948	1929	1981	1981	-2353	-2030	2042
1930	-2008	1903	2068	1832	-2087	1982	1983	2234	-1947	1930	1982	1982	-2352	-2029	-2043
1931	-2007	1904	2069	1807	2143	1983	-2214	2235	-1946	1931	1983	1983	-2351	-2028	-1875
1932	-2006	1905	2070	1808	2287	-2214	-2213	-2014	-1945	1932	-2214	-2214	-2350	-2027	-1874
1933	-2005	1906	2071	1809	2288	-2213	1832	-2013	-1944	1933	-2213	-2213	2286	-2026	-1873
1934	-2004	1907	2072	2078	2289	1832	1807	-2012	-1943	1934	1832	1832	2287	-2025	-1872
1935	-2003	1908	2073	2079	-2290	1807	-2226	-2011	-1942	1935	1807	1807	2288	-2024	-1871
1936	-2002	1909	2074	-2080	2291	-2226	-2225	-2010	-1941	1936	-2226	-2226	2289	-2023	2024
1937	-2001	1910	2075	-2081	2292	-2225	-2224	2093	-1940	1937	-2225	-2225	2290	-2022	2025
1938	-2000	1911	2076	-2182	2293	-2224	-2223	2094	-1939	1938	-2224	-2224	2291	-2021	2026
1939	-1999	1912	2077	2014	2294	-2223	2008	2095	-1938	1939	-2223	-2223	2292	-2020	2027
1940	-1998	1913	2078	-1842	-2295	2008	-2096	2096	-1937	1940	2008	2008	2293	-2019	2028
1941	-1997	1914	2079	-1841	2296	-2096	-2095	-2008	-1936	1941	-2096	-2096	2294	-2018	-2214
1942	1881	1915	-2080	-1840	2297	-2095	-2094	-2329	-1935	1942	-2095	-2095	2295	-2017	-2213
1943	1882	1916	-2081	-1839	2298	-2094	-2093	-1985	-1934	1943	-2094	-2094	2296	-2016	1832
1944	1883	1917	2082	-2050	2299	-2093	2010	1857	-1933	1944	-2093	-2093	2297	-2015	1807
1945	1884	1918	2083	1846	2300	2010	2011	1858	-1932	1945	2010	2010	2298	-2014	-1812
1946	1885	1919	2084	-2361	2301	2011	2012	1992	-1931	1946	2011	2011	2299	-2013	-2014
1947	1886	1920	2085	2131	2302	2012	2013	1993	-1930	1947	2012	2012	2300	-2012	-2013
1948	1887	1921	2086	-1879	2088	2013	2014	1994	-1929	1948	2013	2013	2301	-2011	-2012
1949	1888	1922	2087	-1878	2089	2014	-2235	1995	-1928	1949	2014	2014	2302	-2010	-2011
1950	1889	1923	2143	-1877	2090	-2235	-2234	-1921	-1927	1950	-2235	-2235	2303	-2009	1996
1951	1890	1924	2287	-1876	2091	-2234	-2233	1922	-1926	1951	-2234	-2234	2304	-2008	1997
1952	1891	1925	2288	-2321	-2283	-2233	-2232	1923	-1925	1952	-2233	-2233	2305	2223	1998
1953	1892	1926	2289	-1873	2282	-2232	-2231	1924	-1924	1953	-2232	-2232	2306	2224	1999
1954	1893	1927	2290	-1872	2279	-2231	-2230	1925	-1923	1954	-2231	-2231	2307	2225	2000
1955	1894	1928	2291	-1871	-2247	-2230	-1893	1926	-1922	1955	-2230	-2230	2308	2226	2001
1956	1895	1929	2292	1944	-2098	-1893	1963	1927	-1921	1956	-1893	-1893	2309	2227	2002
1957	1896	1930	2293	1945	1833	1963	-1964	1928	-1920	1957	1963	1963	2310	2228	2333
1958	1897	1931	2294	1946	1834	-1964	1965	2227	-1919	1958	-1964	-1964	2311	2229	-1966
1959	1898	1932	2295	1947	1966	1965	1966	-2009	-1918	1959	1965	1965	2312	2230	-1965
1960	1899	1933	2296	-1977	-2333	1966	-2333	2097	-1917	1960	1966	1966	2313	2231	-1964
1961	1900	1934	2271	-1976	-2002	-2333	-2002	1881	-1916	1961	-2333	-2333	2314	2232	-1963
1962	1901	1935	2167	-1975	-2001	-2002	1976	1882	-1915	1962	-2002	-2002	2315	2233	-1962
1963	1902	1936	-1808	-1974	-2000	1976	1977	1883	-1914	1963	1976	1976	-2181	2234	-1961
1964	1903	1937	-1807	1885	1999	1977	-2229	1884	-1913	1964	1977	1977	-2180	2235	-1960
1965	1904	1938	-1832	1886	-1998	-2229	-2228	-1973	-1912	1965	-2229	-2229	-2179	-2057	-1959
1966	1905	1939	-1831	1887	-2232	-2228	1967	-2033	-1911	1966	-2228	-2228	-2178	-2056	-1958
1967	1906	1940	-1830	1888	-2070	1967	1879	-2032	-1910	1967	1967	1967	-2177	-2055	-1957
1968	1907	1941	-1829	-1920	2069	1879	1880	1941	-1909	1968	1879	1879	-2176	1905	-1956
1969	1908	1942	-1828	-1919	-2068	1880	2098	1942	-1908	1969	1880	1880	-2175	1906	-1955
1970	1909	1943	-1827	-1918	2067	2098	2099	2207	-1907	1970	2098	2098	-2174	1907	-1954
1971	1910	1944	-1826	-1917	2066	2099	2100	2208	-1906	1971	2099	2099	-2173	1908	-1953
1972	1911	1945	-1825	2140	-2065	2100	2101	2209	-1905	1972	2100	2100	-2172	1909	-1952
1973	1912	1946	-1824	2141	2064	2101	2102	2210	-1904	1973	2101	2101	-2171	1910	-1951
1974	1913	1947	-1822	2142	-2063	1994	2103	2211	-1903	1974	2102	2102	-2170	1911	-1950
1975	1914	1948	-1821	2088	-2029	1995	2104	2212	-1902	1975	2103	2103	-2169	1912	-1949
1976	1915	1949	-1820	-2035	2215	-1921	-2184	-1831	-1901	1976	2104	2104	-2168	1913	-1948
1977	1916	1950	-1819	-2034	2144	1922	-2183	-1830	-1900	1977	-2184	-2184	-2167	1914	-1942
1978	1917	1951	-1818	-2033	-2216	1923	-2182	-1829	-1899	1978	-2183	-2183	-2166	1915	-1941
1979	1918	1952	-1817	-2032	-2286	1924	-2045	-1828	-1898	1979	-2182	-2182	-2165	1916	-1940
1980	1919	1953	-1816	-2031	2350	1925	-2044	1804	-1897	1980	-2045	-2045	-2164	1917	-1939
1981	1920	1954	-1815	2038	2351	1926	-2015	1805	-1896	1981	-2044	-2044	-2163	1918	-1938
1982	1921	1955	-1814	-1914	2352	1927	1808	1806	-1895	1982	-2015	-2015	-2162	1919	-1937
1983	1922	1956	-1813	-2202	2353	1928	1809	1833	-1894	1983	1808	1808	2161	1920	-1936
1984	1923	1957	-1812	-2201	2354	2227	1810	1834	-1893	1984	1809	1809	-2160	1996	-1935
1985	1924	1958	-1811	-2200	-2208	-2009	-1915	-1917	-1892	1985	1810	1810	-2159	1997	-1934
1986	1925	1959	1903	-2199	-1844	2097	2039	-1934	-1891	1986	-1915	-1915	-2158	1998	-1933
1987	1926	1960	1904	-2198	-2361	1881	2040	-1933	-1890	1987	2039	2039	-2157	1999	-1932
1988	1927	1961	2219	-2197	2131	1882	2041	-1932	-1889	1988	2040	2040	-2156	2000	-1931
1989	1928	1962	2220	-2196	2132	1883	2042	-1931	-1888	1989	2041	2041	-2155	2001	1930
1990	1929	1963	2221	-2195	2133	1884	1822	1930	-1887	1990	2042	2042	-2154	2002	-1929
1991	1930	1964	2222	-2194	-2134	-1973	1824	1929	-1886	1991	1822	1822	-2153	2333	-1928
[truncated: 1,104 more rows]

## Sheet: GO breaks & genes
Orthologous landmark number	Total number of 5' - end breakpoint events	Total number of 3' - end breakpoint events	Drosohila subgenus 5' - end breakpoint events	Drosohila subgenus 3' - end breakpoint events	Between subgenera 5' - end breakpoint events	Between subgenera 3' - end breakpoint events	Sophophora subgenus 5' - end breakpoint events	Sophophora subgenus 3' - end breakpoint events	Number of IGAs in OL	Number of Genes in OL	Coordinates in D. mel.			Genes (D. melanogaster CG-codes) in OL
A-telo	-	8	-	3	-	1	-	4
1	5	1	0	1	0	0	5	0	1	1	X	63574	87173	CG17131
2	1	1	1	1	0	0	0	0	1	1	X	100872	102655	CG3038
3	1	2	1	0	0	0	0	2	1	1	X	102829	110847	CG2995
4	1	2	0	0	0	0	1	2	1	2	X	112471	120817	CG2945 CG13377
5	6	1	0	0	0	0	6	1	3	3	X	164506	191621	CG12470 CG17885 CG32816
6	3	1	1	1	0	0	2	0	2	2	X	199867	218067	CG3777 CG3757
7	1	3	1	0	0	0	0	3	7	7	X	226853	333414	CG3796 CG3827 CG3839 CG13374 CG3258 CG3972 CG3923
8	4	2	1	0	1	0	2	2	2	2	X	338758	344364	CG3176 CG18273
9	2	6	0	0	0	1	2	5	2	2	X	344761	350316	CG3156 CG17896
10	7	1	1	1	2	0	4	0	1	1	X	351722	353191	CG17778
11	2	1	2	1	0	0	0	0	1	1	X	353293	365902	CG4122
12	1	5	1	0	0	0	0	5	1	3	X	366240	387113	CG18104 CG4262 CG4293
13	5	2	0	1	1	1	4	0	2	2	X	388441	454643	CG7727 CG6172
14	1	7	0	0	1	1	0	6	3	3	X	467367	479869	CG13366 CG13365 CG17828
15	3	2	0	0	0	0	3	2	2	2	X	482385	486228	CG17829 CG7622
16	3	1	1	0	0	0	2	1	1	2	X	486604	492548	CG6189 CG7486
17	1	1	0	0	0	0	1	1	1	1	X	492708	500581	CG6222
18	9	4	0	0	1	2	8	2	1	1	X	501582	503207	CG13367
19	4	8	1	0	2	1	1	7	1	2	X	504108	512863	CG16982 CG13363
20	5	4	0	0	1	1	4	3	3	4	X	543661	615544	CG5227 CG13362 CG13361 CG5254
21	5	1	1	0	0	0	4	1	2	3	X	626849	646910	CG16785 CG12311 CG13360
22	2	3	0	1	0	1	2	1	2	2	X	649989	658278	CG16989 CG7413
23	2	2	0	2	1	0	1	0	7	8	X	662893	789389	CG7359 CG12467 CG14633 CG14632 CG3711 CG3034 CG3708 CG3706
24	1	2	1	0	0	0	0	2	3	5	X	789390	802593	CG32815 CG11642 CG3704 CG3026 CG3703
25	1	2	0	0	0	0	1	2	3	3	X	803474	883524	CG3699 CG3690 CG11638
26	3	1	0	0	0	0	3	1	1	1	X	883678	885113	CG3021
27	2	1	0	0	0	0	2	1	12	13	X	887664	1059742	CG33082 CG14630 CG3019 CG14629 CG3655 CG32859 CG11378 CG11384 CG11379 CG14627 CG14626 CG11380 CG14625
28	6	8	0	0	0	1	6	7	3	3	X	1060600	1068534	CG11381 CG14624 CG11382
29	11	5	1	0	2	0	8	5	1	1	X	1093693	1096680	CG11403
30	3	2	0	0	0	1	3	1	1	1	X	1099561	1108477	CG11405
31	2	4	0	0	1	0	1	4	1	1	X	1146528	1153200	CG14622
32	7	8	0	2	2	2	5	4	1	1	X	1179346	1186275	CG11411
33	8	2	2	0	0	0	6	2	1	1	X	1186335	1190517	CG11409
34	3	2	0	0	0	0	3	2	2	3	X	1198906	1206178	CG11412 CG11418 CG11415
35	2	1	0	1	0	0	2	0	1	1	X	1206708	1210797	CG12773
36	1	2	1	0	0	0	0	2	1	1	X	1210864	1213301	CG11417
37	1	2	0	1	0	0	1	1	1	1	X	1213309	1214434	CG11420
38	2	1	1	0	0	0	1	1	1	1	X	1226181	1226874	CG14770
39	4	2	0	0	0	2	4	0	2	3	X	1227387	1237297	CG3056 CG3051 CG3719
40	1	1	0	1	1	0	0	0	1	1	X	1245480	1249672	CG32813
41	1	5	1	0	0	0	0	5	1	1	X	1249886	1254159	CG11448
42	1	3	0	0	0	0	1	3	4	4	X	1271083	1313875	CG14772 CG3064 CG18531 CG14785
43	2	13	0	2	0	2	2	9	1	1	X	1313996	1317379	CG14786
44	9	7	0	2	1	2	8	3	3	3	X	1317628	1323253	CG14787 CG14788 CG14789
45	4	6	2	0	0	1	2	5	6	6	X	1323574	1333751	CG14777 CG32808 CG14778 CG14779 CG14780 CG14791
46	13	3	3	0	3	0	7	3	2	2	X	1333915	1338243	CG14781 CG14782
47	2	2	0	0	0	0	2	2	3	3	X	1338609	1369620	CG14792 CG33513 CG14795
48	2	1	0	0	0	0	2	1	2	2	X	1408547	1517698	CG14796 CG11491
49	1	1	0	1	0	0	1	0	1	2	X	1521211	1525435	CG3093 CG3740
50	1	1	1	0	0	0	0	1	3	5	X	1525749	1552045	CG3095 CG32809 CG14797 CG3100 CG3771
51	1	8	0	2	0	0	1	6	3	3	X	1565094	1640157	CG3795 CG14808 CG12598
52	1	1	0	0	0	0	1	1	1	1	X	1687478	1709093	CG14801
53	1	3	0	0	0	1	1	2	3	3	X	1714126	1721991	CG14812 CG14813 CG14814
54	5	4	0	1	2	0	3	3	1	3	X	1722065	1728507	CG14802 CG14815 CG14803
55	5	1	0	0	0	0	5	1	1	1	X	1730019	1732637	CG14804
56	1	2	0	0	0	1	1	1	1	1	X	1732861	1733354	CG14817
57	6	2	0	0	1	1	5	1	1	2	X	1733475	1735738	CG14805 CG14818
58	7	2	2	0	1	0	4	2	4	5	X	1736453	1758094	CG14806 CG3848 CG3109 CG11579 CG32803
59	1	2	0	0	0	2	1	0	1	2	X	1758308	1764412	CG32801 CG3810
60	3	2	0	0	3	0	0	2	2	3	X	1764413	1779017	CG3480 CG17766 CG3806
61	2	4	0	0	0	0	2	4	1	1	X	1779161	1783678	CG3573
62	5	3	1	0	1	3	3	0	3	3	X	1783836	1797697	CG11596 CG3857 CG3587
63	5	1	2	1	3	0	0	0	3	3	X	1849379	1865499	CG3600 CG16902 CG4406
64	1	1	1	1	0	0	0	0	1	1	X	1868480	1878814	CG4399
65	1	8	1	0	0	2	0	6	6	7	X	1881250	1921292	CG4376 CG4380 CG4325 CG4322 CG4313 CG4290 CG4281
66	8	6	0	0	0	1	8	5	1	2	X	1928569	1932020	CG4061 CG4045
67	3	6	0	1	0	1	3	4	1	2	X	1933138	1936539	CG4025 CG16903
68	8	9	0	2	2	2	6	5	2	2	X	1936768	1969820	CG3981 CG3954
69	5	4	0	1	0	2	5	1	3	4	X	1982360	2005756	CG18412 CG3835 CG3724 CG3717
70	3	2	0	0	0	0	3	2	1	1	X	2006258	2015139	CG3707
71	4	3	1	1	0	0	3	2	2	2	X	2015298	2028437	CG3656 CG3630
72	8	2	3	1	0	1	5	0	1	1	X	2029653	2031469	CG3540
73	4	2	2	1	2	1	0	0	1	2	X	2037250	2040806	CG3461 CG3460
74	1	1	0	0	1	1	0	0	4	5	X	2043978	2078615	CG3457 CG3456 CG18031 CG33548 CG3299
75	1	3	0	0	1	0	0	3	1	1	X	2080007	2080821	CG14052
76	4	4	0	1	0	1	4	2	1	2	X	2081867	2098194	CG3443 CG3228
77	3	1	0	0	1	0	2	1	3	3	X	2098260	2106137	CG3218 CG3206 CG3193
78	1	1	0	0	0	0	1	1	2	2	X	2106295	2110286	CG3191 CG3091
79	1	2	0	1	0	0	1	1	2	2	X	2110555	2118683	CG3078 CG3073
80	2	4	1	0	0	0	1	4	7	7	X	2118998	2181846	CG3071 CG2924 CG2918 CG2879 CG32798 CG2865 CG14050
81	2	2	0	0	0	0	2	2	2	2	X	2196282	2200793	CG2845 CG14048
82	1	3	0	1	0	0	1	2	4	4	X	2201289	2267055	CG2841 CG14047 CG14045 CG12496
83	2	2	0	0	0	1	2	1	6	7	X	2300320	2441855	CG32796 CG7803 CG33950 CG13758 CG8310 CG13759 CG13760
84	3	5	1	1	0	0	2	4	1	1	X	2442133	2444049	CG17437
85	9	8	0	4	3	2	6	2	1	1	X	2448279	2454761	CG9659
86	2	9	0	2	0	3	2	4	2	3	X	2460347	2466518	CG9900 CG13761 CG8636
87	6	7	0	0	1	5	5	2	2	2	X	2474497	2478301	CG10742 CG9904
88	8	3	1	0	2	0	5	3	2	2	X	2481174	2534013	CG10260 CG2621
89	3	2	0	0	0	0	3	2	2	2	X	2536430	2539088	CG2655 CG2652
90	2	1	0	0	0	0	2	1	2	3	X	2541736	2554371	CG2647 CG2650 CG2658
91	3	1	1	1	0	0	2	0	2	2	X	2554860	2559932	CG2662 CG2675
92	1	1	1	0	0	0	0	1	2	2	X	2560732	2563591	CG2677 CG2680
93	1	1	0	0	0	0	1	1	2	2	X	2564840	2570113	CG2681 CG2685
94	2	6	0	3	0	0	2	3	1	2	X	2570237	2576481	CG2694 CG2701
95	7	2	4	0	0	2	3	0	1	1	X	2580442	2582737	CG2707
96	1	2	0	0	1	1	0	1	2	2	X	2582863	2586215	CG2709 CG2711
97	4	1	0	0	3	1	1	0	1	2	X	2586375	2590482	CG2713 CG2712
98	3	2	1	0	2	0	0	2	24	24	X	2590483	2988959	CG2714 CG2715 CG32795 CG2759 CG12498 CG14416 CG14417 CG14418 CG14419 CG3526 CG3588 CG14424 CG32793 CG3592 CG3598 CG14420 CG14421 CG14422 CG14423 CG17959 CG3603 CG4125 CG4116 CG3653
99	3	2	0	1	0	0	3	1	2	2	X	2991028	3029278	CG3936 CG18508
100	2	8	1	2	0	2	1	4	3	6	X	3029532	3195502	CG4015 CG3939 CG32498 CG10790 CG12181 CG10793
101	4	1	2	1	0	0	2	0	5	5	X	3229339	3320200	CG10798 CG12535 CG14269 CG16782 CG16781
102	1	9	1	2	0	2	0	5	4	4	X	3321893	3341530	CG12206 CG10804 CG10802 CG14270
103	6	2	1	1	1	0	4	1	3	4	X	3341809	3427916	CG10803 CG14271 CG32791 CG32792
104	3	2	2	0	0	0	1	2	1	1	X	3427917	3429776	CG2875
105	3	1	1	0	0	0	2	1	3	3	X	3430694	3517293	CG2872 CG13317 CG2864
106	1	2	0	0	0	0	1	2	2	2	X	3535090	3565367	CG13316 CG2849
107	1	9	0	2	0	2	1	5	2	2	X	3594297	3633912	CG32781 CG32782
108	4	1	1	1	1	0	2	0	2	2	X	3640100	3648990	CG32788 CG32779
109	1	4	1	0	0	1	0	3	1	1	X	3649422	3655746	CG12632
110	4	2	1	1	1	0	2	1	2	2	X	3673539	3702862	CG2901 CG2904
111	3	1	2	0	0	0	1	1	2	2	X	3708200	3725533	CG2913 CG2930
112	2	1	0	0	0	0	2	1	2	2	X	3725977	3735724	CG2934 CG15239
113	1	3	0	2	0	0	1	1	4	4	X	3740264	3785243	CG32776 CG15240 CG2938 CG2941
114	2	4	1	0	0	1	1	3	2	2	X	3790493	3799342	CG32783 CG5014
115	8	7	0	1	1	1	7	5	1	1	X	3810663	3813801	CG6428
116	4	1	0	0	1	0	3	1	5	5	X	3915559	3946272	CG33220 CG32790 CG32778 CG15376 CG6379
117	1	1	0	0	0	0	1	1	1	1	X	3948251	3949434	CG6358
118	1	2	0	0	0	0	1	2	5	6	X	3949581	3971984	CG4934 CG4944 CG6133 CG4865 CG6121 CG4857
119	3	1	0	1	0	0	3	0	1	1	X	3976483	3978084	CG32775
120	1	5	1	0	0	0	0	5	8	8	X	3979609	4167438	CG3665 CG15571 CG15570 CG15573 CG32774 CG3697 CG2982 CG3712
121	5	2	0	0	0	2	5	0	1	2	X	4167863	4207691	CG3620 CG12693
122	3	6	2	1	1	1	0	4	4	4	X	4211656	4385873	CG3626 CG3578 CG3556 CG11427
123	1	8	0	1	0	3	1	4	2	2	X	4386147	4389747	CG3564 CG3568
124	9	5	2	0	3	2	4	3	1	1	X	4391757	4394403	CG17592
125	5	5	0	0	2	2	3	3	1	2	X	4394404	4397117	CG15912 CG11436
126	6	2	2	0	0	0	4	2	2	2	X	4397204	4399582	CG3527 CG11444
127	4	3	0	0	1	1	3	2	2	2	X	4403309	4471460	CG3546 CG12212
128	5	5	0	0	2	0	3	5	5	6	X	4481567	4495069	CG3346 CG3081 CG3062 CG3052 CG7038 CG3024
129	5	1	0	1	1	0	4	0	1	2	X	4495258	4503245	CG7035 CG15473
130	1	6	1	3	0	0	0	3	2	2	X	4503389	4522768	CG3009 CG3000
131	9	7	0	1	1	0	8	6	1	1	X	4525637	4532108	CG2984
132	4	1	1	0	0	0	3	1	3	3	X	4547600	4573981	CG7010 CG7024 CG6986
133	1	1	0	0	0	0	1	1	3	3	X	4615793	4630874	CG2932 CG15471 CG6978
134	1	1	0	0	0	1	1	0	4	4	X	4671241	4750543	CG12682 CG15470 CG32771 CG32770
135	1	6	0	0	1	3	0	3	2	2	X	4752149	4760225	CG6927 CG32772
136	5	4	0	0	4	4	1	0	2	2	X	4760655	4766885	CG4041 CG6903
137	4	4	2	0	2	2	0	2	1	1	X	4771898	4781387	CG4068
138	3	2	1	0	1	0	1	2	4	4	X	4784369	4915082	CG6899 CG15468 CG12680 CG6824
139	1	1	0	0	0	0	1	1	1	1	X	4919871	4929964	CG32767
140	8	3	1	1	1	0	6	2	10	10	X	4977135	5154165	CG6789 CG15465 CG5062 CG15464 CG6775 CG15786 CG3323 CG15785 CG17764 CG3319
141	2	1	1	0	0	0	1	1	2	2	X	5154484	5157125	CG4528 CG3315
142	1	1	0	0	0	0	1	1	3	4	X	5157610	5164234	CG4193 CG4198 CG15930 CG4202
143	1	3	0	1	0	0	1	2	1	1	X	5164235	5167947	CG3312
144	5	3	1	0	0	0	4	3	3	3	X	5169123	5177668	CG4206 CG3309 CG4208
145	3	1	0	0	0	0	3	1	2	2	X	5177982	5246379	CG4209 CG10706
146	1	2	0	0	0	0	1	2	2	2	X	5250469	5265573	CG3252 CG3249
147	4	3	1	0	0	1	3	2	1	1	X	5267441	5272145	CG4165
148	3	2	0	0	1	0	2	2	4	4	X	5272754	5341267	CG16756 CG15784 CG16752 CG3239
149	5	1	2	0	0	0	3	1	2	2	X	5345502	5347812	CG32762 CG4151
150	1	2	0	0	0	0	1	2	1	1	X	5362498	5364007	CG12730
151	2	4	0	0	0	1	2	3	2	2	X	5374164	5457470	CG33980 CG4136
152	2	3	0	2	0	0	2	1	2	2	X	5458674	5464038	CG15780 CG3208
153	3	3	1	1	0	0	2	2	1	1	X	5464371	5467795	CG3201
154	5	4	1	0	2	0	2	4	5	5	X	5472890	5507289	CG11473 CG17761 CG17758 CG15777 CG15776
155	9	1	4	0	0	0	5	1	8	9	X	5509865	5538251	CG3187 CG4119 CG3129 CG4111 CG3171 CG15779 CG15778 CG3160 CG12410
156	3	2	1	0	0	0	2	2	1	1	X	5538252	5540443	CG3149
157	2	1	0	1	0	0	2	0	2	2	X	5544424	5563015	CG4096 CG33080
158	1	1	1	0	0	1	0	0	3	4	X	5564972	5597018	CG32758 CG15773 CG3125 CG4078
159	3	2	1	0	2	1	0	1	4	4	X	5597760	5609419	CG15772 CG15929 CG15771 CG3086
160	2	4	0	1	0	1	2	2	6	6	X	5609803	5633572	CG15770 CG3097 CG15769 CG15768 CG3108 CG4064
161	4	2	1	1	1	0	2	1	1	1	X	5716075	5718600	CG3033
162	2	3	1	0	0	0	1	3	1	1	X	5719071	5722087	CG3025
163	3	1	0	0	1	0	2	1	2	2	X	5722232	5728636	CG3016 CG16721
164	3	4	0	0	1	2	2	2	13	15	X	5746100	5858414	CG4027 CG4020 CG12236 CG3011 CG3726 CG32756 CG6041 CG32755 CG6048 CG6067 CG4790 CG14447 CG5966 CG4766 CG4746
165	6	2	2	0	1	1	3	1	2	2	X	5883121	5893746	CG5941 CG5937
166	2	1	0	0	1	0	1	1	1	1	X	5905146	5909527	CG5921
167	1	1	0	0	0	0	1	1	5	7	X	5913196	5949209	CG5928 CG4690 CG4666 CG4660 CG4317 CG4320 CG5905
168	3	1	0	0	0	1	3	0	7	7	X	5952289	6070399	CG15899 CG32750 CG32751 CG32754 CG3599 CG3774 CG3595
169	2	1	0	1	2	0	0	0	1	1	X	6071411	6076554	CG14446
170	2	3	2	0	0	0	0	3	2	2	X	6082553	6098490	CG14445 CG3585
171	3	3	0	1	0	1	3	1	1	1	X	6101069	6102655	CG3780
172	3	7	0	3	1	1	2	3	3	5	X	6102894	6124507	CG3576 CG3781 CG12225 CG3566 CG32744
173	4	5	0	0	1	0	3	5	1	1	X	6129374	6133200	CG3458
174	7	5	0	0	1	2	6	3	1	2	X	6133390	6136479	CG15897 CG3455
175	6	3	1	0	0	0	5	3	1	3	X	6136586	6140351	CG15896 CG15891 CG15892
176	3	1	0	0	0	0	3	1	1	1	X	6140627	6144209	CG3815
177	1	3	0	1	0	1	1	1	1	1	X	6144287	6146506	CG12219
178	4	1	1	0	0	0	3	1	4	4	X	6149226	6188599	CG3823 CG15894 CG15893 CG3842
179	1	1	0	0	0	0	1	1	2	2	X	6192339	6195635	CG3847 CG3446
180	1	2	0	0	0	0	1	2	1	1	X	6195865	6206429	CG3861
181	1	1	0	0	0	0	1	1	1	1	X	6208655	6210945	CG3429
182	1	1	0	0	0	0	1	1	2	2	X	6211185	6218077	CG3869 CG12217
183	1	2	0	0	0	0	1	2	2	2	X	6312270	6330302	CG3367 CG12543
184	6	3	1	0	2	0	3	3	6	6	X	6374184	6435883	CG3926 CG3314 CG3929 CG3950 CG3960 CG17717
185	3	1	0	0	0	0	3	1	1	1	X	6436014	6441870	CG10695
186	5	2	0	0	1	0	4	2	3	3	X	6442281	6499422	CG14444 CG3973 CG3226
187	1	3	0	0	0	0	1	3	4	4	X	6499852	6519205	CG32742 CG3224 CG3977 CG3198
188	3	3	0	0	0	0	3	3	3	4	X	6519625	6528866	CG4039 CG3192 CG4094 CG4095
189	3	2	0	0	0	0	3	2	1	1	X	6529052	6532254	CG4523
190	4	2	0	0	0	0	4	2	4	4	X	6532830	6562215	CG3184 CG14442 CG14440 CG14441
191	3	3	1	0	0	2	2	1	2	2	X	6566788	6589493	CG3168 CG3203
192	4	2	0	0	1	0	3	2	2	4	X	6616472	6648782	CG14437 CG3135 CG3126 CG14436
193	2	2	0	0	0	1	2	1	3	3	X	6650364	6666151	CG4532 CG4536 CG3075
194	2	2	0	0	1	0	1	2	1	1	X	6666263	6668079	CG4542
195	1	3	0	1	0	0	1	2	1	1	X	6668491	6669293	CG4547
196	4	2	1	0	0	0	3	2	2	3	X	6669874	6688900	CG32743 CG12796 CG14435
197	5	4	0	0	0	1	5	3	2	2	X	6689579	6694723	CG4557 CG3044
198	6	1	0	0	0	0	6	1	2	2	X	6695008	6697859	CG4558 CG14434
199	1	5	0	1	0	0	1	4	1	2	X	6713744	6725755	CG33691 CG33692
200	9	5	3	1	0	0	6	4	1	2	X	6803247	6813949	CG32732 CG14431
201	1	3	0	0	0	0	1	3	2	2	X	6815177	6818646	CG4586 CG3040
202	2	2	0	2	0	0	2	0	5	5	X	6819252	6856371	CG3039 CG14430 CG2977 CG4590 CG3035
203	1	2	1	0	0	0	0	2	2	2	X	6856597	6858898	CG32736 CG3032
204	4	2	1	0	0	0	3	2	3	3	X	6876861	6895620	CG12541 CG14427 CG14426
205	4	1	1	0	0	0	3	1	2	3	X	6914649	6943289	CG4607 CG14425 CG18350
206	4	8	0	1	0	3	4	4	1	1	X	6943809	6947533	CG4615
207	3	7	0	2	0	2	3	3	1	1	X	6947786	6949734	CG4617
208	4	3	2	0	1	0	1	3	3	3	X	7038312	7131429	CG9650 CG1958 CG1677
209	3	1	0	0	0	0	3	1	2	2	X	7132089	7136540	CG2059 CG1659
210	1	1	0	0	0	0	1	1	2	2	X	7153177	7168976	CG9653 CG1643
211	1	8	0	0	0	0	1	8	1	1	X	7169454	7174051	CG2079
212	7	1	0	0	1	0	6	1	9	9	X	7182606	7521259	CG1435 CG1999 CG15033 CG15035 CG9657 CG11368 CG32720 CG11369 CG11387
213	2	3	0	0	0	1	2	2	1	1	X	7528694	7541930	CG12690
214	3	2	0	0	1	1	2	1	1	1	X	7558021	7563164	CG15478
215	2	1	0	0	1	0	1	1	2	2	X	7567370	7573558	CG12153 CG32721
216	1	3	0	0	0	0	1	3	2	2	X	7573995	7579638	CG12155 CG12151
217	2	1	0	0	0	0	2	1	1	1	X	7580162	7581713	CG12156
218	1	1	0	0	0	0	1	1	2	2	X	7582589	7612062	CG12157 CG12663
219	1	1	0	1	0	0	1	0	1	1	X	7680215	7685172	CG1402
220	1	1	1	1	0	0	0	0	2	2	X	7697738	7704035	CG10920 CG1409
221	1	2	1	0	0	2	0	0	4	4	X	7709826	7729340	CG15326 CG2175 CG15324 CG15327
222	1	4	0	2	1	0	0	2	2	2	X	7734302	7738797	CG17256 CG18624
223	4	2	0	2	0	0	4	0	3	3	X	7739273	7748882	CG1422 CG10944 CG1430
224	3	3	3	0	0	1	0	2	4	4	X	7750868	7765367	CG10946 CG1444 CG1514 CG15329
225	6	10	2	0	0	2	4	8	1	1	X	7765697	7767209	CG1515
226	8	2	2	0	2	0	4	2	1	1	X	7769354	7776591	CG10777
227	2	1	0	0	0	1	2	0	2	2	X	7776965	7779916	CG10778 CG1524
228	1	2	0	0	1	0	0	2	3	4	X	7780140	7797481	CG1527 CG1530 CG2206 CG1531
229	1	13	0	2	0	2	1	9	2	2	X	7799180	7831337	CG15332 CG32858
230	6	2	0	0	0	0	6	2	1	1	X	7885179	7901373	CG2252
231	6	1	0	1	0	0	6	0	1	1	X	7906883	7915473	CG1560
232	2	5	2	4	0	1	0	0	1	1	X	7916521	7920711	CG2253
233	2	3	0	0	2	0	0	3	4	4	X	7921113	7937328	CG1571 CG2254 CG2256 CG2257
234	5	2	2	0	1	0	2	2	1	1	X	7941813	7947274	CG2258
235	2	3	0	0	0	0	2	3	1	1	X	7947816	7961380	CG2259
236	9	1	2	0	2	0	5	1	1	2	X	7962299	7966356	CG1575 CG2260
237	2	1	0	0	0	0	2	1	2	5	X	7966512	7987477	CG15335 CG2116 CG10958 CG2120 CG2262
238	1	1	0	0	0	0	1	1	1	1	X	7987852	7988757	CG17982
239	1	1	0	0	0	0	1	1	1	1	X	7989137	7990837	CG2263
240	1	2	0	0	0	0	1	2	2	2	X	7991173	7993730	CG2129 CG15336
241	2	3	0	0	0	0	2	3	6	7	X	7994106	8008028	CG10959 CG10763 CG18262 CG10961 CG1583 CG15337 CG10761
242	2	7	0	0	0	0	2	7	3	3	X	8013190	8084690	CG2278 CG2272 CG32717
243	2	2	0	0	0	0	2	2	4	4	X	8085920	8096885	CG2147 CG10964 CG2151 CG2286
244	2	2	0	0	0	0	2	2	5	6	X	8098467	8234740	CG1632 CG10965 CG15343 CG1636 CG2302 CG1387
245	1	1	0	0	0	0	1	1	2	2	X	8244631	8252522	CG10555 CG11190
246	1	2	0	0	0	1	1	1	1	1	X	8270500	8275436	CG18009
247	5	9	2	2	2	1	1	6	2	2	X	8278356	8282036	CG32712 CG12125
248	2	1	0	0	0	1	2	0	2	2	X	8282316	8287577	CG1440 CG12123
249	1	1	0	0	1	1	0	0	3	3	X	8293469	8306130	CG11202 CG32713 CG15347
250	1	1	0	0	1	0	0	1	4	10	X	8306712	8361162	CG1474 CG12117 CG12116 CG33962 CG15350 CG15351 CG1478 CG11213 CG12743 CG33181
251	6	5	0	2	0	0	6	3	2	2	X	8405897	8416171	CG11265 CG12111
252	5	2	2	0	0	0	3	2	1	1	X	8419572	8433763	CG12065
253	8	8	1	3	0	2	7	3	3	3	X	8437289	8495886	CG12737 CG12109 CG12154
254	4	8	0	1	0	1	4	6	1	1	X	8522299	8525954	CG12772
255	9	6	0	0	3	0	6	6	1	1	X	8526818	8533927	CG11284
256	6	6	2	0	1	0	3	6	2	3	X	8533928	8557718	CG12108 CG11294 CG1787
257	5	2	0	2	1	0	4	0	1	2	X	8560187	8565479	CG1785 CG1994
258	1	1	1	1	0	0	0	0	3	3	X	8565793	8717371	CG1789 CG11354 CG12075
259	1	1	1	0	0	1	0	0	8	10	X	8718839	8894208	CG10701 CG1885 CG10648 CG1871 CG15352 CG12660 CG12661 CG10966 CG10962 CG12662
260	2	3	0	0	2	0	0	3	7	7	X	8894480	8927582	CG33224 CG4040 CG15365 CG10970 CG7267 CG7246 CG7041
261	1	1	0	0	0	0	1	1	1	1	X	8928152	8931093	CG32707
262	13	1	2	0	3	0	8	1	2	2	X	8934752	8948940	CG7033 CG7766
263	1	4	0	0	0	1	1	3	1	1	X	8949539	8951823	CG8264
264	4	3	1	0	1	0	2	3	3	3	X	8952220	8980239	CG7039 CG9113 CG12664
265	1	3	0	0	0	0	1	3	2	2	X	8987773	8994280	CG7065 CG8971
266	2	7	0	0	0	1	2	6	1	1	X	8994546	8997199	CG7055
267	7	5	0	0	0	2	7	3	1	1	X	9002143	9003732	CG9022
268	5	7	0	0	1	2	4	5	2	2	X	9003872	9005206	CG15367 CG9034
269	7	5	0	1	1	0	6	4	1	1	X	9005338	9007262	CG9060
270	7	1	1	0	0	0	6	1	3	3	X	9008488	9037770	CG12218 CG12115 CG12057
271	5	11	0	0	1	0	4	11	2	3	X	9037890	9041682	CG12056 CG12106 CG12118
272	6	1	0	0	0	0	6	1	1	1	X	9042027	9047037	CG2194
273	1	7	0	2	0	0	1	5	4	4	X	9051341	9062568	CG12119 CG12665 CG15368 CG15369
274	6	3	1	2	2	1	3	0	1	1	X	9062876	9068478	CG12120
275	1	5	0	0	1	1	0	4	6	7	X	9070677	9092557	CG15370 CG15371 CG12121 CG32704 CG12124 CG12058 CG12127
276	2	1	0	0	0	0	2	1	2	2	X	9093016	9101041	CG15793 CG17754
277	1	3	0	0	0	0	1	3	2	2	X	9101412	9112840	CG15797 CG32703
278	1	2	0	1	0	1	1	0	1	1	X	9115996	9118110	CG17446
279	1	5	0	2	1	2	0	1	2	2	X	9118638	9128320	CG16892 CG12132
280	5	1	1	0	3	1	1	0	2	2	X	9129870	9164465	CG1689 CG12135
281	3	1	1	0	2	1	0	0	5	5	X	9171879	9396450	CG32705 CG17252 CG12139 CG12654 CG32700
282	3	3	1	0	2	1	0	2	3	3	X	9396826	9401697	CG32701 CG2998 CG15317
283	7	2	0	0	2	0	5	2	2	2	X	9403886	9425196	CG32702 CG32699
284	2	3	0	0	0	1	2	2	1	1	X	9431106	9433625	CG3001
285	2	4	0	0	0	1	2	3	1	2	X	9446255	9451187	CG3002 CG3004
286	3	3	0	0	2	1	1	2	1	1	X	9451581	9453849	CG12141
287	4	2	1	1	1	1	2	0	3	3	X	9454181	9495978	CG3003 CG3099 CG32697
288	1	2	0	2	1	0	0	0	2	2	X	9504317	9528097	CG3106 CG15319
289	1	2	1	0	0	0	0	2	2	2	X	9539409	9600490	CG12653 CG1343
290	2	4	0	0	0	0	2	4	13	13	X	9623967	9776200	CG1354 CG32698 CG2045 CG15245 CG32696 CG32695 CG15247 CG9686 CG9689 CG9691 CG15249 CG1986 CG1780
291	2	3	0	0	0	0	2	3	6	8	X	9808674	9855074	CG1791 CG1889 CG15250 CG15251 CG15252 CG32694 CG32692 CG33557
292	2	1	0	0	0	0	2	1	3	3	X	9875333	9895636	CG2989 CG15314 CG15313
293	1	3	0	1	0	1	1	1	2	2	X	9896169	9901037	CG2979 CG2985
294	2	11	0	1	1	2	1	8	2	3	X	9902315	9927703	CG15312 CG32693 CG32685
295	13	10	4	4	2	1	7	5	4	4	X	9931754	10057567	CG12094 CG12102 CG15311 CG15309
296	4	3	0	0	1	0	3	3	2	3	X	10109445	10171178	CG12643 CG32684 CG32682
297	5	3	1	0	0	0	4	3	6	9	X	10175377	10230355	CG15306 CG15307 CG12641 CG2221 CG17841 CG32686 CG2898 CG32681 CG2222
298	2	1	0	0	0	0	2	1	3	3	X	10231154	10304897	CG2096 CG32683 CG15302
299	1	4	0	3	0	0	1	1	3	3	X	10305965	10322420	CG15304 CG17255 CG2889
300	3	3	2	1	0	0	1	2	1	1	X	10324585	10327162	CG2890
301	2	1	1	0	0	0	1	1	1	1	X	10327246	10331845	CG32687
302	1	3	0	1	0	1	1	1	3	4	X	10335685	10441034	CG33175 CG32680 CG32678 CG1619
303	2	3	0	2	1	0	1	1	5	6	X	10441295	10554897	CG2124 CG1628 CG9817 CG15295 CG12637 CG32677
304	5	2	4	1	0	0	1	1	1	1	X	10558336	10589923	CG32676
305	2	4	1	0	0	0	1	4	3	4	X	10589924	10613553	CG1799 CG11556 CG32675 CG32672
306	6	1	1	0	2	0	3	1	1	1	X	10641215	10668000	CG1691
307	1	6	0	1	0	0	1	5	5	8	X	10677967	10702600	CG1664 CG15210 CG15209 CG32669 CG17333 CG2202 CG11207 CG1655
308	3	1	0	0	0	0	3	1	1	1	X	10702875	10708798	CG2186
309	1	2	0	0	0	0	1	2	1	2	X	10714524	10723025	CG2157 CG1637
310	1	6	0	2	0	0	1	4	2	2	X	10723360	10744520	CG1615 CG1582
311	2	5	0	1	0	3	2	1	4	4	X	10751302	10774930	CG15207 CG11203 CG2155 CG2145
312	2	2	0	0	1	0	1	2	12	13	X	10783667	10937312	CG2174 CG16922 CG1567 CG15204 CG12626 CG11160 CG1552 CG1545 CG1537 CG15203 CG18085 CG2081 CG2076
313	3	6	0	1	0	1	3	4	3	3	X	10937947	10953142	CG2061 CG1961 CG11126
314	4	2	0	0	1	0	3	2	3	3	X	10957613	10974321	CG11122 CG16916 CG2522
315	5	5	0	1	2	1	3	3	7	7	X	10975454	10993807	CG1453 CG18292 CG32667 CG15199 CG15202 CG15201 CG1404
316	4	2	0	0	0	0	4	2	1	2	X	10994667	10998997	CG1908 CG1397
317	1	2	0	0	0	0	1	2	8	9	X	10999619	11167564	CG1938 CG32668 CG1386 CG11105 CG12625 CG15198 CG12624 CG12623 CG1641
318	1	3	0	0	0	0	1	3	2	2	X	11169516	11179292	CG1639 CG1657
319	5	1	0	0	0	0	5	1	5	6	X	11194272	11213315	CG1738 CG11752 CG1737 CG18361 CG11750 CG1594
320	1	2	0	0	0	0	1	2	1	1	X	11213679	11214401	CG1728
321	1	1	0	0	0	0	1	1	1	1	X	11214855	11254214	CG1725
322	1	1	0	1	0	0	1	0	2	2	X	11258718	11262621	CG32664 CG17867
323	1	5	1	3	0	0	0	2	2	3	X	11268073	11299520	CG1743 CG11727 CG1747
324	1	6	0	0	0	0	1	6	4	4	X	11300009	11328323	CG1745 CG15194 CG1756 CG11715
325	7	8	0	0	0	2	7	6	1	1	X	11338388	11400264	CG32666
326	3	2	0	0	1	0	2	2	1	1	X	11407991	11415540	CG1554
327	4	1	0	0	0	1	4	0	2	2	X	11415842	11418742	CG11699 CG11697
328	1	4	0	2	1	0	0	2	1	2	X	11419019	11421813	CG11696 CG15191
329	4	1	0	0	0	0	4	1	1	1	X	11437621	11443753	CG1697
330	1	3	0	0	0	0	1	3	1	1	X	11444041	11449398	CG2247
331	3	6	0	1	0	0	3	5	2	2	X	11449769	11453592	CG1703 CG15220
332	1	3	0	0	0	0	1	3	1	1	X	11454620	11456839	CG1705
333	3	2	0	0	0	0	3	2	1	1	X	11459780	11514024	CG1817
334	1	5	0	1	0	0	1	4	1	1	X	11515114	11516322	CG2371
335	3	1	1	0	0	0	2	1	1	1	X	11516766	11532504	CG1822
336	1	4	0	0	0	0	1	4	3	4	X	11532902	11552801	CG1830 CG2444 CG2448 CG2446
337	4	2	0	0	1	0	3	2	1	1	X	11554739	11557669	CG1837
338	2	2	0	0	0	0	2	2	6	7	X	11558006	11626190	CG1841 CG2457 CG15221 CG9369 CG9360 CG9355 CG4139
339	7	3	0	0	1	2	6	1	3	3	X	11626472	11650468	CG15224 CG4147 CG1578
340	3	2	1	0	1	1	1	1	1	2	X	11657288	11669662	CG32663 CG32662
341	3	1	0	0	1	0	2	1	2	2	X	11673547	11680102	CG1895 CG15740
342	2	2	0	0	0	0	2	2	1	1	X	11685268	11686452	CG1967
343	1	4	0	0	0	0	1	4	1	1	X	11686629	11688710	CG10347
344	4	2	0	0	0	0	4	2	1	1	X	11688933	11697629	CG1886
345	1	5	0	0	0	0	1	5	1	1	X	11698586	11702821	CG2025
346	5	7	0	1	0	1	5	5	5	5	X	11849442	11862965	CG1803 CG15736 CG15735 CG1796 CG1490
347	4	1	0	0	0	0	4	1	7	7	X	11866569	12166113	CG1786 CG32656 CG11356 CG2750 CG15733 CG12720 CG32659
348	1	2	0	0	0	2	1	0	5	6	X	12242826	12297045	CG2574 CG10524 CG11245 CG15927 CG15731 CG1900
349	1	2	0	0	1	0	0	2	2	2	X	12298036	12311447	CG17788 CG15926
350	1	1	0	0	0	0	1	1	3	3	X	12320910	12350484	CG2560 CG15730 CG2556
351	1	1	0	0	0	0	1	1	1	1	X	12352916	12358229	CG11146
352	1	2	0	0	0	0	1	2	3	3	X	12363111	12399388	CG32653 CG2555 CG15729
353	2	3	0	0	0	0	2	3	2	2	X	12405147	12426130	CG11138 CG1848
354	3	1	0	0	0	0	3	1	1	1	X	12426486	12429576	CG1824
355	1	1	0	0	0	0	1	1	1	2	X	12431290	12445536	CG32654 CG1463
356	1	3	0	1	0	1	1	1	5	5	X	12445851	12465056	CG2543 CG11085 CG15728 CG15727 CG2540
357	2	5	0	4	1	1	1	0	1	1	X	12493299	12513623	CG4070
358	5	2	4	0	1	0	0	2	2	3	X	12519935	12583722	CG4013 CG15725 CG4004
359	3	5	0	2	0	0	3	3	2	2	X	12591679	12604920	CG3989 CG3812
360	4	1	0	1	0	0	4	0	3	4	X	12610509	12665573	CG32647 CG32648 CG3775 CG3754
361	1	1	1	0	0	0	0	1	3	3	X	12731484	12737420	CG32650 CG32649 CG4407
362	1	2	0	2	0	0	1	0	3	3	X	12737680	12743535	CG4404 CG4647 CG4400
363	1	1	1	0	0	0	0	1	6	6	X	12743890	12808425	CG4645 CG4396 CG4395 CG32642 CG32644 CG15721
364	2	2	0	0	0	0	2	2	5	5	X	12808722	12910072	CG12716 CG15719 CG15720 CG12715 CG18646
365	2	1	0	0	0	0	2	1	3	3	X	12913652	12929674	CG4353 CG12244 CG2200
366	1	6	0	1	0	0	1	5	3	3	X	12930029	12948373	CG4351 CG4349 CG12714
367	2	1	0	0	0	0	2	1	1	2	X	12949074	12962731	CG4346 CG32638
368	1	1	0	1	0	0	1	0	1	1	X	12962957	12964228	CG15717
369	1	1	1	0	0	0	0	1	1	1	X	12965475	12968502	CG4330
370	2	1	0	0	0	0	2	1	2	2	X	12988977	12993515	CG4332 CG4303
371	1	9	0	0	0	2	1	7	5	5	X	12993643	13028310	CG12096 CG4187 CG32637 CG12723 CG2453
372	2	3	0	1	0	2	2	0	1	1	X	13046270	13047918	CG1591
373	3	7	2	0	1	1	0	6	2	2	X	13048346	13096431	CG1771 CG1618
374	1	3	0	0	0	2	1	1	1	1	X	13096817	13119258	CG1770
375	3	2	0	0	2	0	1	2	1	1	X	13119967	13121678	CG15743
376	1	7	0	0	0	1	1	6	2	2	X	13122300	13130588	CG15744 CG1764
377	4	1	0	0	0	0	4	1	1	1	X	13131036	13133847	CG1622
378	2	3	0	0	0	0	2	3	3	3	X	13139235	13163254	CG15745 CG12724 CG1630
379	4	2	0	0	1	2	3	0	5	5	X	13163785	13204270	CG1633 CG2033 CG15747 CG10617 CG15749
380	1	1	0	0	1	0	0	1	1	1	X	13204543	13214097	CG1640
381	1	6	0	1	0	1	1	4	5	5	X	13214626	13235166	CG1987 CG1660 CG1989 CG1662 CG1673
382	6	4	1	2	0	1	5	1	1	1	X	13243307	13247011	CG1998
383	5	3	1	0	1	0	3	3	8	8	X	13361950	13436440	CG15754 CG15756 CG15757 CG11816 CG32631 CG32633 CG32632 CG7107
384	2	2	0	0	0	0	2	2	2	2	X	13440108	13445913	CG11178 CG9938
385	10	1	1	0	2	0	7	1	1	1	X	13556226	13561049	CG11156
386	3	3	0	0	1	1	2	2	2	4	X	13561140	13578592	CG10986 CG10988 CG11134 CG11151
387	3	1	1	0	1	0	1	1	2	2	X	13580605	13590740	CG10990 CG32625
388	2	4	0	0	0	1	2	3	2	2	X	13591114	13595113	CG11130 CG11129
389	4	1	0	0	1	0	3	1	1	1	X	13596707	13610686	CG11111
390	1	3	0	0	0	0	1	3	1	1	X	13613955	13616118	CG10992
391	6	3	0	0	1	0	5	3	1	1	X	13616450	13617323	CG11103
392	7	3	0	2	1	0	6	1	1	2	X	13617686	13645438	CG33174 CG10996
393	6	3	4	2	0	1	2	0	1	1	X	13645636	13646815	CG11095
394	1	2	0	0	1	0	0	2	3	3	X	13647379	13664196	CG10997 CG11092 CG11063
395	2	5	0	0	0	0	2	5	17	17	X	13664686	14033896	CG32626 CG11071 CG32611 CG11072 CG11068 CG18319 CG32614 CG12479 CG12480 CG1368 CG11581 CG11584 CG32603 CG12481 CG11585 CG13403 CG1372
396	7	2	0	0	2	0	5	2	1	1	X	14034141	14034844	CG11590
397	2	3	0	1	0	1	2	1	1	3	X	14035309	14059821	CG32604 CG32597 CG11674
398	2	4	0	1	1	1	1	2	3	3	X	14060228	14067989	CG15871 CG33249 CG33248
399	5	1	0	0	1	0	4	1	1	1	X	14068343	14071860	CG1839
400	2	3	0	1	0	0	2	2	2	2	X	14071926	14076756	CG1434 CG1810
401	4	1	1	1	0	0	3	0	5	5	X	14077766	14110568	CG32599 CG12047 CG1461 CG13404 CG1517
402	2	12	2	3	0	1	0	8	4	4	X	14111766	14331179	CG32602 CG32600 CG9411 CG12540
403	1	5	0	0	0	1	1	4	2	2	X	14666575	14672134	CG14411 CG14407
404	6	1	0	0	2	0	4	1	2	13	X	14673353	14784675	CG32593 CG12539 CG9522 CG9521 CG9519 CG9518 CG9517 CG9514 CG9512 CG9509 CG12398 CG9503 CG9009
405	1	1	0	0	0	0	1	1	1	1	X	14805193	14839263	CG10952
406	1	3	0	0	0	1	1	2	3	5	X	14844620	14900323	CG32592 CG32594 CG5541 CG5548 CG9053
407	1	1	0	0	0	0	1	1	4	4	X	14905393	14918592	CG9057 CG33177 CG33178 CG9065
408	1	1	0	0	0	0	1	1	1	1	X	14919098	14919744	CG15027
409	1	3	0	1	0	0	1	2	7	9	X	14920075	15021644	CG5599 CG5627 CG9072 CG9081 CG33968 CG9091 CG9095 CG15028 CG15029
410	4	3	1	1	1	0	2	2	2	2	X	15044335	15063628	CG5662 CG9101
411	5	6	2	2	1	0	2	4	3	3	X	15126970	15151702	CG5877 CG15032 CG6211
412	3	2	0	0	0	1	3	1	1	2	X	15162283	15167377	CG6157 CG9114
413	6	1	3	0	2	0	1	1	2	3	X	15168415	15178551	CG6170 CG9123 CG12608
414	1	1	0	0	0	0	1	1	1	1	X	15179056	15183958	CG6227
415	1	2	0	0	0	2	1	0	5	6	X	15186294	15283826	CG9151 CG9156 CG9164 CG9176 CG18210 CG9195
416	2	5	1	3	1	0	0	2	2	3	X	15284199	15296272	CG11654 CG11655 CG9198
417	5	2	0	0	0	0	5	2	3	4	X	15296649	15306021	CG6299 CG6294 CG15642 CG9201
418	1	5	0	2	0	0	1	3	2	2	X	15306180	15309314	CG6308 CG9203
419	3	1	0	0	1	1	2	0	1	1	X	15316314	15320546	CG6340
420	3	3	2	1	1	2	0	0	1	1	X	15320859	15344726	CG33206
421	2	5	0	1	2	0	0	4	1	1	X	15344813	15356100	CG9210
422	7	3	1	1	0	0	6	2	1	1	X	15406007	15408522	CG9213
423	6	2	1	0	0	0	5	2	3	3	X	15410922	15416809	CG15645 CG7872 CG9215
424	3	1	0	0	0	1	3	0	2	3	X	15417098	15424865	CG8097 CG9220 CG8105
425	4	4	2	1	2	0	0	3	1	1	X	15438507	15460477	CG9224
426	4	1	0	0	1	0	3	1	5	5	X	15501999	15537702	CG15646 CG12708 CG8128 CG9240 CG9245
427	2	2	0	0	0	2	2	0	2	2	X	15538062	15544535	CG8134 CG9281
428	4	1	1	0	3	0	0	1	1	1	X	15545061	15545946	CG15601
429	1	5	0	1	0	0	1	4	3	5	X	15548052	15571013	CG8184 CG8191 CG12379 CG8198 CG11678
430	6	2	0	0	1	1	5	1	1	1	X	15571426	15572846	CG11679
431	10	10	4	1	0	0	6	9	2	2	X	15573183	15580144	CG8206 CG8944
432	3	4	0	1	0	0	3	3	1	1	X	16256781	16271435	CG32575
433	5	1	1	0	0	0	4	1	1	1	X	16273084	16275217	CG9947
434	1	4	0	1	0	0	1	3	1	1	X	16275370	16279304	CG4420
435	3	8	1	1	0	1	2	6	3	3	X	16279421	16361352	CG9946 CG4429 CG9907
436	6	2	0	0	1	0	5	2	1	1	X	16421848	16422873	CG13014
437	3	5	0	0	0	0	3	5	1	1	X	16422939	16427366	CG9802
438	10	7	0	0	1	1	9	6	1	1	X	16430459	16432407	CG9784
439	8	2	0	0	1	0	7	2	1	1	X	16444649	16448795	CG18582
440	1	1	0	1	0	0	1	0	1	1	X	16449447	16455523	CG9782
441	2	4	2	0	0	3	0	1	1	1	X	16459046	16471356	CG9774
442	5	3	1	0	0	1	4	2	2	2	X	16472164	16474350	CG4464 CG9742
443	4	6	0	0	1	2	3	4	1	1	X	16474842	16483634	CG4521
444	6	12	2	3	0	4	4	5	1	1	X	16487156	16488949	CG9723
445	2	2	0	0	0	0	2	2	1	2	X	16489316	16503014	CG18572 CG15865
446	2	8	0	1	0	1	2	6	2	2	X	16513252	16517832	CG13011 CG9703
447	10	3	2	0	2	0	6	3	3	8	X	16545240	16585847	CG13008 CG18358 CG32572 CG9634 CG32571 CG32570 CG32569 CG32574
448	2	6	0	0	0	2	2	4	1	1	X	16586126	16617371	CG9623
449	5	4	1	1	0	0	4	3	2	2	X	16617891	16620915	CG4742 CG9609
450	6	1	0	0	1	0	5	1	2	2	X	16621693	16629960	CG4756 CG4768
451	1	6	0	2	0	0	1	4	1	1	X	16631453	16634621	CG9132
452	2	1	0	0	0	0	2	1	1	1	X	16637617	16639217	CG13005
453	1	11	0	2	0	1	1	8	2	2	X	16640244	16660433	CG4805 CG4829
454	6	1	0	0	0	0	6	1	2	2	X	16806633	16908935	CG9059 CG8949
455	1	2	0	2	0	0	1	0	2	4	X	16911260	16921549	CG34014 CG4949 CG8945 CG4955
456	2	9	2	0	0	4	0	5	3	3	X	16925791	16939789	CG16700 CG4991 CG8936
457	8	1	0	0	2	0	6	1	1	1	X	16941574	16969058	CG5004
458	2	2	0	0	0	0	2	2	2	3	X	16970887	16982191	CG33935 CG8923 CG8922
459	4	3	1	0	1	0	2	3	2	2	X	16982975	16993243	CG5010 CG32562
460	5	3	0	0	0	1	5	2	17	17	X	16994876	17116648	CG5055 CG8918 CG5070 CG32564 CG12995 CG18258 CG5162 CG12998 CG5172 CG12997 CG10598 CG10597 CG8915 CG8675 CG12996 CG5424 CG8664
461	5	5	1	0	2	0	2	5	1	1	X	17119640	17125605	CG8649
462	8	2	2	0	1	0	5	2	1	1	X	17136413	17139415	CG5445
463	1	6	0	0	0	1	1	5	7	7	X	17148518	17286480	CG5488 CG5529 CG8611 CG12994 CG5613 CG12993 CG8568
464	4	2	1	0	0	0	3	2	3	3	X	17290481	17403072	CG8557 CG12432 CG8527
465	2	7	0	1	0	0	2	6	1	1	X	17405791	17412835	CG8465
466	5	11	1	3	0	2	4	6	2	2	X	17457151	17465957	CG8408 CG8316
467	5	5	0	0	2	0	3	5	2	2	X	17466026	17469979	CG5703 CG8289
468	3	2	0	0	0	1	3	1	2	2	X	17470220	17486443	CG5800 CG32555
469	3	1	1	0	1	1	1	0	1	2	X	17486705	17503159	CG8211 CG5870
470	1	9	0	1	1	1	0	7	5	5	X	17503160	17543595	CG12990 CG32556 CG8188 CG5884 CG8173
471	8	2	0	1	0	0	8	1	1	3	X	17544723	17585632	CG32560 CG32559 CG15816
472	1	2	0	1	0	0	1	1	3	3	X	17603320	17653552	CG6269 CG6352 CG12986
473	1	7	0	0	0	0	1	7	1	1	X	17656264	17659930	CG8146
474	6	2	0	0	1	1	5	1	1	1	X	17678925	17681593	CG6492
475	7	2	5	0	1	0	1	2	5	6	X	17682046	17694744	CG15814 CG6506 CG32554 CG32557 CG6762 CG7846
476	2	8	0	2	0	3	2	3	1	3	X	17694865	17721144	CG6769 CG7826 CG12985
477	5	4	1	0	2	0	2	4	2	2	X	17733676	17741221	CG32495 CG7772
478	8	2	2	0	1	0	5	2	5	6	X	17741624	17882567	CG6842 CG6847 CG12348 CG12672 CG6867 CG15373
479	1	3	0	1	0	0	1	2	3	4	X	17898539	17924415	CG7092 CG7536 CG7098 CG7206
480	2	3	1	0	0	0	1	3	1	1	X	17925183	17926792	CG7113
481	6	1	0	0	2	0	4	1	1	1	X	17928528	17931354	CG7122
482	1	1	0	0	0	0	1	1	1	1	X	17931771	17935271	CG7192
483	3	8	0	0	0	0	3	8	1	1	X	17935909	17937421	CG7128
484	3	2	0	0	0	0	3	2	1	1	X	17939490	17950759	CG7178
485	4	7	1	3	0	0	3	4	1	1	X	17966073	17971035	CG5659
486	8	2	0	0	0	2	8	0	14	14	X	17989305	18213788	CG5744 CG12611 CG5907 CG5927 CG15064 CG33639 CG5988 CG33542 CG5993 CG6023 CG6123 CG6106 CG6103 CG6205
487	2	3	0	0	2	0	0	3	1	1	X	18215484	18219132	CG6223
488	3	2	0	0	0	0	3	2	8	10	X	18221869	18320858	CG6186 CG32549 CG15055 CG32550 CG32548 CG6290 CG32551 CG32547 CG6361 CG6367
489	1	1	0	0	0	0	1	1	4	4	X	18321585	18333806	CG15046 CG15044 CG15043 CG6394
490	2	3	0	0	0	1	2	2	7	7	X	18339818	18446510	CG6461 CG6470 CG6335 CG15048 CG15047 CG6500 CG15040
491	4	2	1	1	1	1	2	0	3	4	X	18469571	18487028	CG6606 CG6540 CG6617 CG6632
492	2	1	0	0	2	0	0	1	4	5	X	18487329	18526682	CG6659 CG6551 CG6696 CG6578 CG6816
493	1	12	0	3	0	1	1	8	5	6	X	18542601	18617425	CG6857 CG6873 CG12609 CG32540 CG6891 CG18259
494	7	5	0	2	0	1	7	2	2	2	X	18664543	18676838	CG7101 CG7103
495	5	3	0	1	1	0	4	2	4	4	X	18678436	18691388	CG7274 CG7280 CG7282 CG7322
496	4	1	1	0	0	0	3	1	3	3	X	18692153	18697653	CG7288 CG32544 CG7326
497	1	5	0	0	0	0	1	5	2	2	X	18699377	18714576	CG17757 CG32542
498	3	4	0	0	0	1	3	3	1	1	X	18718439	18721559	CG7332
499	5	2	0	0	2	0	3	2	7	8	X	18728444	19004579	CG7349 CG7378 CG32541 CG7440 CG15883 CG7481 CG7502 CG7537
500	1	6	0	0	0	2	1	4	1	1	X	19010934	19013892	CG7556
501	4	1	1	1	2	0	1	0	3	3	X	19021972	19029984	CG7635 CG7914 CG14194
502	1	5	1	0	0	2	0	3	1	1	X	19029995	19035714	CG7990
503	7	1	1	0	1	0	5	1	2	2	X	19036576	19045295	CG12359 CG14195
504	1	3	0	2	0	0	1	1	4	4	X	19047194	19072404	CG7874 CG7876 CG7884 CG14196
505	8	1	2	0	2	1	4	0	2	3	X	19077570	19085983	CG7889 CG7992 CG7890
506	2	7	1	1	1	2	0	4	1	1	X	19086048	19095163	CG8002
507	2	2	0	0	0	1	2	1	1	2	X	19095768	19107216	CG7893 CG8010
508	3	5	1	2	1	0	1	3	2	2	X	19107722	19110809	CG32537 CG32536
509	4	1	1	0	0	0	3	1	1	1	X	19111193	19114285	CG8028
510	3	4	0	2	0	0	3	2	3	3	X	19116457	19156002	CG8034 CG8051 CG8062
511	8	1	0	0	0	0	8	1	1	1	X	19187135	19304001	CG12199
512	1	1	0	0	0	0	1	1	3	3	X	19308082	19318580	CG32533 CG32531 CG12202
513	1	1	0	0	0	0	1	1	1	1	X	19319684	19325888	CG3291
514	3	1	0	0	0	0	3	1	1	2	X	19326360	19328338	CG12203 CG12204
515	1	3	0	0	0	0	1	3	4	4	X	19328483	19355747	CG14199 CG3400 CG14200 CG12233
516	2	2	0	0	0	0	2	2	3	4	X	19355964	19381419	CG33525 CG32534 CG12231 CG32532
517	1	3	0	1	0	1	1	1	1	1	X	19395277	19399533	CG3917
518	2	8	0	0	1	1	1	7	2	2	X	19400137	19413746	CG12230 CG14217
519	10	1	4	0	0	0	6	1	2	2	X	19431968	19435787	CG14206 CG14220
520	1	1	0	0	0	0	1	1	2	2	X	19439095	19449551	CG14207 CG14208
521	1	8	0	5	0	1	1	2	1	3	X	19450144	19452466	CG14210 CG12788 CG17767
522	3	1	0	0	0	0	3	1	1	1	X	19455383	19457009	CG14222
523	1	2	0	1	0	1	1	0	1	1	X	19457051	19459666	CG14211
524	1	6	0	0	1	0	0	6	2	2	X	19459671	19472289	CG14212 CG12238
525	5	2	2	1	0	0	3	1	5	5	X	19478465	19500812	CG12235 CG12234 CG14215 CG14223 CG14216
526	3	1	2	0	0	0	1	1	1	1	X	19501170	19506289	CG12529
527	1	3	0	0	0	0	1	3	2	2	X	19506573	19517453	CG14225 CG14226
528	4	2	0	0	0	0	4	2	2	2	X	19517685	19527435	CG14224 CG14228
529	2	2	0	0	0	0	2	2	2	2	X	19528130	19533189	CG14229 CG12530
530	1	7	0	3	0	0	1	4	5	5	X	19534007	19560623	CG14231 CG14232 CG14230 CG14233 CG12531
531	10	3	0	0	1	0	9	3	3	4	X	19564940	19578275	CG12532 CG14234 CG14235 CG18809
532	4	1	0	0	0	0	4	1	1	2	X	19578370	19579684	CG33931 CG33932
533	2	6	0	0	0	1	2	5	2	2	X	19579994	19584108	CG32528 CG12534
534	6	1	0	0	1	0	5	1	1	2	X	19584737	19596260	CG12703 CG12702
535	1	2	0	1	0	1	1	0	2	2	X	19609924	19685988	CG12701 CG11940
536	3	1	1	0	2	1	0	0	1	1	X	19686153	19693318	CG11943
537	1	1	0	1	1	0	0	0	1	1	X	19702347	19740624	CG32529
538	1	3	1	0	0	1	0	2	9	9	X	19792437	19996667	CG12655 CG9565 CG17003 CG33517 CG15322 CG18859 CG9572 CG9575 CG9576
539	4	4	0	0	2	0	2	4	2	3	X	20000357	20005211	CG9577 CG9581 CG9578
540	4	1	0	0	0	0	4	1	3	4	X	20038836	20062132	CG18000 CG17052 CG17058 CG17068
541	1	1	0	0	0	0	1	1	1	2	X	20062133	20067806	CG17060 CG17065
542	3	2	0	0	0	0	3	2	2	2	X	20078656	20122349	CG17063 CG1504
543	3	6	0	0	0	1	3	5	1	2	X	20202127	20204456	CG11738 CG1467
544	4	4	0	0	1	0	3	4	7	8	X	20205154	20234675	CG11734 CG15459 CG15458 CG11748 CG1670 CG15457 CG1668 CG32505
545	5	2	0	0	0	0	5	2	1	1	X	20234676	20237088	CG1676
546	1	4	0	0	0	0	1	4	1	1	X	20237322	20237666	CG15456
547	3	2	0	0	0	0	3	2	1	1	X	20238202	20240275	CG11710
548	3	2	0	0	0	0	3	2	1	1	X	20240357	20243886	CG1692
549	2	1	0	0	0	1	2	0	4	4	X	20250017	20301782	CG1695 CG32506 CG1702 CG1412
550	4	1	3	0	1	1	0	0	2	2	X	20322223	20335602	CG1812 CG18492
551	2	3	1	0	1	1	0	2	18	18	X	20351557	20839022	CG15455 CG15454 CG15453 CG1379 CG1829 CG1849 CG15452 CG32508 CG15450 CG12678 CG11233 CG11229 CG11227 CG12092 CG2071 CG1304 CG10998 CG1532
552	4	1	1	0	1	0	2	1	1	1	X	20860640	20864792	CG1518
553	1	3	0	0	0	0	1	3	2	5	X	20865227	20927183	CG32513 CG32512 CG11566 CG33670 CG1501
554	2	1	0	0	0	0	2	1	3	3	X	20927835	20950803	CG15445 CG32516 CG1819
555	2	1	0	0	0	0	2	1	4	4	X	21015986	21125731	CG32521 CG1494 CG1718 CG1801
556	1	1	0	0	0	0	1	1	3	4	X	21126736	21134709	CG1489 CG33713 CG33714 CG1696
557	2	1	0	0	0	0	2	1	3	3	X	21134721	21155766	CG1486 CG1693 CG1484
558	3	5	1	0	0	0	2	5	1	2	X	21156056	21160515	CG17051 CG1685
559	6	2	0	0	0	0	6	2	1	1	X	21161006	21168586	CG1391
560	5	4	0	2	0	0	5	2	3	4	X	21168952	21195837	CG1403 CG1410 CG1414 CG1417
561	6	2	3	1	0	1	3	0	5	5	X	21199683	21268410	CG1424 CG12794 CG14583 CG12564 CG12565
562	2	10	0	2	2	1	0	7	2	2	X	21411276	21419534	CG14476 CG17450
563	8	2	2	0	2	0	4	2	1	1	X	21653344	21654866	CG14620
564	1	3	0	0	0	1	1	2	3	3	X	21655139	21675374	CG14614 CG14619 CG14613
565	3	2	1	0	1	0	1	2	1	1	X	21678244	21685486	CG12576
566	1	1	0	0	0	1	1	0	1	1	X	21685800	21689519	CG14617
567	3	9	2	1	1	0	0	8	3	5	X	21690582	21747622	CG14616 CG17600 CG17596 CG17598 CG17599
A-cent	13	-	4	-	1	-	8	-
B-telo	-	6	-	0	-	0	-	6
568	5	5	0	0	0	1	5	4	1	1	2L	9836	18583	CG2671
569	5	4	1	2	1	2	3	0	1	1	2L	102382	104054	CG11377
570	2	1	0	0	2	0	0	1	1	2	2L	104055	114433	CG12178 CG2674
571	1	2	0	0	0	0	1	2	9	9	2L	117079	153106	CG4822 CG3164 CG2718 CG31976 CG31975 CG31974 CG11454 CG4648 CG11620
572	1	1	0	0	0	0	1	1	4	4	2L	153535	158603	CG3709 CG11455 CG3436 CG33635
573	1	2	0	0	0	0	1	2	2	3	2L	159040	207297	CG18497 CG11488 CG11617
574	1	3	0	0	0	0	1	3	3	4	2L	207399	252331	CG11490 CG3696 CG13693 CG11606
575	5	1	0	0	0	0	5	1	5	5	2L	277588	294679	CG11561 CG3625 CG11592 CG11562 CG3582
576	2	4	0	0	0	0	2	4	2	2	2L	295109	303955	CG2720 CG2699
577	3	1	0	0	0	1	3	0	2	8	2L	312343	357868	CG4574 CG11912 CG11911 CG33127 CG31920 CG33992 CG31921 CG11907
578	1	3	0	0	1	0	0	3	2	2	2L	378116	402181	CG3935 CG4213
579	1	2	0	0	0	0	1	2	1	1	2L	404286	408035	CG4033
580	1	2	0	0	0	0	1	2	1	2	2L	408036	418536	CG4260 CG4063
581	1	4	0	0	0	0	1	4	3	3	2L	418557	421407	CG13690 CG4087 CG11885
582	2	1	0	0	0	0	2	1	3	4	2L	421800	453023	CG13692 CG13691 CG4114 CG4280
583	1	2	0	0	0	0	1	2	6	6	2L	453111	540541	CG4164 CG4133 CG4297 CG4184 CG4427 CG2762
584	2	1	0	0	0	0	2	1	2	2	2L	541235	544627	CG3018 CG11840
585	1	1	0	0	0	0	1	1	3	3	2L	545148	558762	CG11822 CG2914 CG11838
586	1	1	0	0	0	0	1	1	3	4	2L	559611	568162	CG2789 CG11835 CG2794 CG2863
587	1	1	0	0	0	0	1	1	6	6	2L	568346	594687	CG2807 CG13688 CG2813 CG13687 CG2819 CG2851
588	1	3	0	0	0	0	1	3	5	6	2L	640021	790795	CG17941 CG3159 CG3022 CG13948 CG3544 CG3324
589	5	1	0	0	0	0	5	1	6	9	2L	811632	833245	CG3561 CG3883 CG3639 CG15880 CG3876 CG3642 CG3662 CG3862 CG3727
590	2	1	0	0	0	0	2	1	6	6	2L	833584	865861	CG3365 CG4291 CG3943 CG13949 CG13950 CG4276
591	1	3	0	0	0	0	1	3	1	1	2L	868675	869911	CG4258
592	2	5	0	0	0	1	2	4	4	5	2L	870464	958100	CG33526 CG3966 CG15824 CG4226 CG4341
593	1	1	0	0	0	0	1	1	2	3	2L	1011403	1077811	CG31795 CG4415 CG4385
594	1	1	0	0	0	0	1	1	1	1	2L	1077980	1080809	CG4426
595	1	2	0	1	0	0	1	1	3	4	2L	1080913	1112702	CG4428 CG4629 CG4644 CG14339
596	2	3	1	1	0	1	1	1	7	9	2L	1112988	1156306	CG14340 CG4710 CG4552 CG4577 CG4726 CG4749 CG5041 CG4764 CG33979
597	2	1	0	0	1	0	1	1	4	5	2L	1158679	1170079	CG4775 CG5080 CG4785 CG14341 CG5105
598	1	1	0	0	0	0	1	1	22	23	2L	1170234	1502903	CG31922 CG5118 CG4887 CG4896 CG4947 CG5001 CG5139 CG14342 CG5397 CG5423 CG5430 CG5450 CG5556 CG5561 CG5565 CG31659 CG33126 CG14346 CG5481 CG31928 CG33128 CG18131 CG7420
599	1	1	0	0	0	0	1	1	5	6	2L	1517532	1614182	CG7428 CG12193 CG4231 CG14351 CG31935 CG7361
600	2	3	0	0	0	0	2	3	1	1	2L	1667847	1698632	CG31666
601	4	1	0	0	0	1	4	0	2	2	2L	1704904	1710415	CG17158 CG17660
602	1	6	0	0	1	1	0	5	2	3	2L	1710466	1724391	CG17642 CG17657 CG18317
603	3	1	0	0	0	0	3	1	5	6	2L	1724971	1752116	CG17654 CG31938 CG31937 CG17652 CG17646 CG17712
604	1	3	0	0	0	0	1	3	6	7	2L	1752349	1943816	CG17648 CG31662 CG15623 CG31665 CG31663 CG7295 CG7337
605	3	1	0	1	0	0	3	0	6	7	2L	1945840	1986955	CG33673 CG31670 CG10908 CG15356 CG15362 CG7289 CG4233
606	1	1	1	0	0	0	0	1	1	1	2L	1988291	1988949	CG7291
607	1	1	0	0	0	0	1	1	3	3	2L	1997774	2008855	CG33543 CG15353 CG15361
608	1	3	0	0	0	0	1	3	5	6	2L	2024043	2109836	CG4238 CG15378 CG4244 CG15377 CG33516 CG12674
609	6	4	0	0	2	2	4	2	1	1	2L	2130815	2137296	CG7254
610	4	1	0	0	3	1	1	0	1	1	2L	2137350	2145175	CG31671
611	1	2	0	0	1	0	0	2	2	3	2L	2145491	2155390	CG11723 CG7261 CG7263
612	1	2	0	0	0	0	1	2	4	5	2L	2155760	2214179	CG15382 CG3166 CG10874 CG15385 CG4265
613	1	5	0	0	0	3	1	2	2	2	2L	2214972	2217168	CG10880 CG15386
614	3	2	0	1	2	0	1	1	6	7	2L	2217363	2239365	CG7074 CG7082 CG15387 CG7085 CG10882 CG31679 CG32463
615	2	1	1	0	0	0	1	1	3	3	2L	2239408	2251270	CG31682 CG4267 CG17240
616	1	1	0	0	0	1	1	0	10	11	2L	2251584	2374511	CG17239 CG4270 CG17237 CG10838 CG16995 CG9967 CG33955 CG3664 CG4272 CG3597 CG3609
617	1	1	0	0	1	0	0	1	2	2	2L	2374689	2380514	CG15390 CG9866
618	1	1	0	0	0	0	1	1	6	6	2L	2381140	2419771	CG9867 CG9870 CG3557 CG9887 CG18641 CG31684
619	1	1	0	0	0	0	1	1	9	9	2L	2420808	2573047	CG9886 CG9885 CG15393 CG3539 CG9884 CG3528 CG3515 CG9964 CG18559
620	1	1	0	1	0	0	1	0	19	24	2L	2575276	2763610	CG3227 CG9883 CG3214 CG9881 CG3210 CG15395 CG9962 CG33125 CG17301 CG9880 CG17302 CG9879 CG15396 CG31690 CG15398 CG31689 CG2903 CG9961 CG2843 CG3127 CG9894 CG9958 CG9960 CG2848
621	1	2	1	2	0	0	0	0	2	3	2L	2764067	2768166	CG3077 CG2855 CG3069
622	1	5	1	1	0	2	0	2	1	1	2L	2768590	2770066	CG3057
623	1	4	0	2	0	0	1	2	3	3	2L	2770137	2799970	CG2862 CG15399 CG3139
624	2	4	0	4	0	0	2	0	1	1	2L	2805518	2812147	CG16987
625	3	2	3	0	0	2	0	0	7	7	2L	2814634	2848734	CG15400 CG3131 CG3119 CG2973 CG2975 CG18558 CG2983
626	1	1	0	0	1	1	0	0	2	2	2L	2849732	2856706	CG3104 CG2986
627	1	2	0	0	1	0	0	2	3	5	2L	2857159	2878149	CG2991 CG31694 CG8813 CG8814 CG3083
628	1	5	0	0	0	0	1	5	1	1	2L	2878593	2878958	CG31950
629	3	2	0	0	0	0	3	2	1	1	2L	2880706	2885208	CG3059
630	2	2	0	0	0	2	2	0	2	2	2L	2888284	2964853	CG8817 CG3151
631	2	1	0	0	2	0	0	1	1	1	2L	2969773	2972676	CG3178
632	1	3	0	0	0	0	1	3	2	2	2L	2972892	2978501	CG3157 CG3165
633	2	1	0	0	0	0	2	1	2	3	2L	2979697	2992761	CG3733 CG18642 CG3736
634	2	3	0	0	0	0	2	3	1	1	2L	2992964	2998614	CG3558
635	2	4	0	3	0	1	2	0	2	2	2L	3013501	3021506	CG17265 CG17264
636	2	1	1	0	1	0	0	1	1	1	2L	3023235	3026450	CG3542
637	1	1	0	0	0	0	1	1	1	2	2L	3026528	3030581	CG3605 CG17219
638	1	1	0	0	0	0	1	1	5	5	2L	3030582	3039720	CG17257 CG17258 CG17259 CG17260 CG17262
639	1	2	0	1	0	1	1	0	1	1	2L	3040112	3041625	CG17221
640	1	3	0	1	1	0	0	2	2	2	2L	3043973	3068184	CG3524 CG3523
641	2	2	0	0	0	0	2	2	1	1	2L	3068339	3144613	CG9660
642	2	1	0	0	0	0	2	1	2	2	2L	3145125	3159630	CG12400 CG12399
643	1	2	0	1	0	1	1	0	1	1	2L	3159956	3162403	CG8825
644	1	6	0	2	1	0	0	4	1	1	2L	3163647	3168999	CG3488
645	4	2	1	0	0	0	3	2	10	10	2L	3309222	3369231	CG15406 CG3277 CG3326 CG8837 CG33281 CG33282 CG3285 CG15408 CG3327 CG3304
646	1	1	0	1	0	0	1	0	2	2	2L	3373781	3376619	CG15412 CG9662
647	1	2	1	0	0	0	0	2	3	3	2L	3377008	3447591	CG3289 CG3254 CG2772
648	8	1	3	0	2	0	3	1	3	3	2L	3449686	3457058	CG2774 CG12795 CG3248
649	1	2	0	0	0	0	1	2	2	3	2L	3457329	3466111	CG8843 CG3246 CG3241
650	2	2	0	0	0	0	2	2	3	3	2L	3466162	3479621	CG8844 CG3238 CG8846
651	2	3	0	0	0	0	2	3	8	9	2L	3480954	3530286	CG15414 CG3234 CG31954 CG33123 CG17593 CG3213 CG8851 CG8852 CG15415
652	1	2	0	0	0	0	1	2	25	26	2L	3530903	3784129	CG8853 CG10016 CG3242 CG3851 CG2788 CG15418 CG10033 CG2808 CG10017 CG16704 CG3513 CG31779 CG16713 CG16712 CG3604 CG10031 CG2816 CG31778 CG31777 CG33122 CG2818 CG2822 CG10019 CG31959 CG31772 CG10021
653	2	7	0	0	0	3	2	4	1	1	2L	3790663	3802245	CG3921
654	4	4	1	0	2	0	1	4	4	4	2L	3810799	3867507	CG3407 CG16738 CG2939 CG3964
655	2	1	0	0	1	0	1	1	12	13	2L	3867714	4198058	CG3980 CG31957 CG3399 CG31774 CG31773 CG15422 CG15423 CG10039 CG12676 CG31962 CG11767 CG31961 CG3714
656	3	1	0	0	0	0	3	1	1	1	2L	4198402	4217852	CG3352
657	2	1	0	0	0	0	2	1	2	2	2L	4224650	4228563	CG3702 CG2960
658	2	3	0	0	0	1	2	2	4	4	2L	4257571	4345411	CG15425 CG15427 CG16857 CG2969
659	1	6	0	6	0	0	1	0	1	2	2L	4352975	4380616	CG15429 CG3048
660	5	6	5	6	0	0	0	0	1	1	2L	4380617	4382719	CG17612
661	6	1	6	0	0	0	0	1	2	2	2L	4382920	4387046	CG3338 CG18013
662	1	6	0	5	0	0	1	1	1	2	2L	4388321	4393814	CG4104 CG3652
663	8	2	7	0	0	1	1	1	6	6	2L	4394198	4444677	CG3054 CG33003 CG3058 CG15431 CG15432 CG15437
664	3	1	0	0	1	1	2	0	1	1	2L	4446662	4448637	CG15438
665	2	2	0	0	2	0	0	2	1	1	2L	4449289	4453004	CG15439
666	1	1	0	0	0	0	1	1	1	1	2L	4453167	4454457	CG15440
667	1	3	0	0	0	0	1	3	2	2	2L	4454665	4456822	CG15434 CG15441
668	1	1	0	0	0	1	1	0	1	1	2L	4457176	4458364	CG15442
669	1	2	0	0	1	1	0	1	1	1	2L	4459004	4459532	CG33002
670	2	3	0	0	1	1	1	2	1	2	2L	4459835	4463437	CG15435 CG15443
671	2	3	0	1	1	1	1	1	10	12	2L	4465200	4794042	CG17840 CG15444 CG33196 CG3355 CG11929 CG12205 CG15634 CG3251 CG15633 CG11928 CG15631 CG15630
672	2	1	0	0	1	0	1	1	1	1	2L	4794549	4796576	CG3294
673	1	2	0	0	0	0	1	2	1	1	2L	4796584	4801923	CG3244
674	2	4	0	0	0	2	2	2	1	2	2L	4813025	4818210	CG15629 CG3225
675	3	2	0	0	1	1	2	1	2	2	2L	4821776	4830670	CG15628 CG2976
676	3	1	0	0	1	0	2	1	1	1	2L	4830968	4834317	CG15627
677	2	2	0	0	0	0	2	2	3	3	2L	4835333	4846764	CG15626 CG12194 CG2950
678	2	5	0	2	0	2	2	1	7	8	2L	4847748	4903889	CG11927 CG2937 CG11926 CG31660 CG11924 CG3008 CG15625 CG3036
679	3	1	0	0	2	1	1	0	3	3	2L	4904068	4936665	CG2837 CG12787 CG15624
680	3	2	2	0	1	1	0	1	2	4	2L	4942748	4949751	CG14044 CG8849 CG3469 CG8873
681	3	3	0	0	1	2	2	1	1	1	2L	4955519	4958292	CG3753
682	2	1	0	0	1	1	1	0	1	1	2L	4958411	4966331	CG31652
683	2	1	0	0	2	0	0	1	1	2	2L	4966332	4968936	CG8882 CG8885
684	2	2	0	0	0	2	2	0	1	2	2L	4969004	4971453	CG3756 CG8886
685	1	2	0	0	1	1	0	1	1	1	2L	4971704	4973687	CG14043
686	2	2	0	0	1	1	1	1	2	2	2L	4973978	4976989	CG3782 CG8890
687	3	4	1	0	1	2	1	2	1	2	2L	4977324	4979377	CG3792 CG8891
688	2	1	0	0	1	1	1	0	3	3	2L	4979536	4991295	CG8892 CG31653 CG3805
689	1	4	0	0	1	1	0	3	1	1	2L	4993641	5009744	CG33113
690	2	2	0	0	1	0	1	2	6	9	2L	5011113	5053027	CG3887 CG16858 CG4145 CG14041 CG31650 CG33995 CG31919 CG9121 CG9124
691	2	1	0	1	0	0	2	0	3	4	2L	5053028	5059816	CG14040 CG14036 CG5825 CG18174
692	1	3	1	0	0	0	0	3	1	1	2L	5060832	5070750	CG14039
693	2	3	0	0	0	0	2	3	2	2	2L	5071038	5093515	CG5827 CG31651
694	2	1	0	0	0	0	2	1	1	1	2L	5094021	5095439	CG5828
695	1	1	0	0	0	1	1	0	2	2	2L	5096227	5100178	CG4230 CG8680
696	1	2	0	0	1	0	0	2	2	2	2L	5102798	5205690	CG14035 CG33715
697	10	1	6	0	0	0	4	1	5	5	2L	5271724	5324927	CG14025 CG14030 CG14029 CG14024 CG14023
698	1	2	0	1	0	0	1	1	2	3	2L	5327241	5338053	CG14028 CG14022 CG14021
699	1	1	0	0	0	0	1	1	2	2	2L	5339225	5365039	CG12512 CG11020
700	1	1	0	0	0	0	1	1	4	4	2L	5404342	5519889	CG6604 CG6634 CG14020 CG7382
701	1	1	0	0	0	0	1	1	1	2	2L	5520258	5523877	CG11024 CG7371
702	1	8	0	1	0	2	1	5	6	11	2L	5525905	5552648	CG31989 CG31648 CG31915 CG7277 CG14016 CG14015 CG7269 CG6944 CG6957 CG14014 CG18269
703	1	1	0	0	0	0	1	1	15	15	2L	5552937	5723791	CG14013 CG6992 CG7234 CG14011 CG7251 CG18266 CG14010 CG31646 CG7235 CG12511 CG7236 CG14007 CG34011 CG11149 CG7238
704	1	1	0	1	0	0	1	0	1	4	2L	5724658	5759810	CG11030 CG14006 CG11147 CG11029
705	1	1	1	0	0	1	0	0	2	3	2L	5762674	5800204	CG11142 CG9171 CG31912
706	1	1	0	0	1	1	0	0	8	8	2L	5800514	5904674	CG14005 CG7239 CG11034 CG31644 CG14004 CG31645 CG8965 CG9021
707	1	2	0	0	1	0	0	2	11	11	2L	5907180	5967498	CG14001 CG9019 CG9042 CG9044 CG13999 CG13998 CG9046 CG13997 CG9048 CG9050 CG13992
708	2	2	0	0	0	0	2	2	2	2	2L	5968597	5970984	CG9064 CG18340
709	2	1	0	0	0	0	2	1	7	7	2L	5972900	6012338	CG9553 CG9075 CG9078 CG9088 CG9093 CG9092 CG9098
710	1	2	0	0	0	1	1	1	5	5	2L	6013057	6036920	CG11607 CG13996 CG9107 CG9109 CG9115
711	2	1	0	0	1	0	1	1	12	15	2L	6036990	6073962	CG9117 CG31643 CG9127 CG9131 CG12393 CG9135 CG13995 CG9140 CG13994 CG9144 CG9147 CG9150 CG13993 CG9154 CG9159
712	1	1	0	0	0	1	1	0	4	5	2L	6091417	6127762	CG18783 CG9175 CG31641 CG31642 CG9226
713	1	1	0	0	1	0	0	1	29	30	2L	6127866	6455934	CG9227 CG9222 CG13991 CG13990 CG31639 CG31640 CG9481 CG9486 CG13983 CG33531 CG13984 CG9491 CG9493 CG11567 CG9497 CG9498 CG9499 CG9501 CG9505 CG9506 CG13981 CG33295 CG9507 CG9508 CG9511 CG13982 CG11527 CG9523 CG9527 CG9528
714	1	5	0	2	0	3	1	0	2	2	2L	6456106	6463843	CG9526 CG16947
715	1	1	0	0	1	0	0	1	2	2	2L	6468538	6476972	CG9535 CG9536
716	1	1	0	0	0	0	1	1	6	9	2L	6477178	6526996	CG9539 CG9537 CG9542 CG9543 CG9548 CG31638 CG9547 CG9550 CG31637
717	2	1	0	0	0	0	2	1	5	6	2L	6527449	6564398	CG9554 CG9595 CG11015 CG11043 CG9596 CG31911
718	1	3	0	3	0	0	1	0	1	1	2L	6565170	6566117	CG13766
719	1	9	1	4	0	4	0	1	1	1	2L	6568390	6601066	CG11319
720	1	10	0	4	0	3	1	3	2	2	2L	6611408	6618476	CG11050 CG11320
721	2	2	0	0	0	0	2	2	2	2	2L	6635545	6654583	CG31635 CG11098
722	2	6	0	3	0	0	2	3	2	2	2L	6656670	6662035	CG31636 CG11070
723	1	12	0	7	0	0	1	5	3	6	2L	6663965	6684357	CG11181 CG9232 CG11331 CG11330 CG11329 CG11328
724	1	2	0	0	0	1	1	1	5	6	2L	6684905	6731346	CG11327 CG11326 CG11325 CG11188 CG11324 CG11199
725	2	7	0	3	1	1	1	3	7	8	2L	6732866	6796780	CG11201 CG11323 CG11221 CG31910 CG11321 CG17378 CG9258 CG9261
726	3	1	0	0	1	0	2	1	9	9	2L	6801363	6907817	CG17377 CG11236 CG17375 CG31632 CG10800 CG10805 CG10806 CG13772 CG13773
727	1	2	0	2	0	0	1	0	3	5	2L	6911338	6926122	CG4488 CG10203 CG32829 CG10206 CG10377
728	2	1	2	0	0	0	0	1	4	4	2L	6932685	6950135	CG18304 CG10158 CG9211 CG9207
729	1	2	0	2	0	0	1	0	1	2	2L	6950440	6956872	CG3423 CG13775
730	2	5	2	4	0	0	0	1	1	1	2L	6957010	6958970	CG3430
731	2	2	1	0	0	0	1	2	5	6	2L	6958971	6971736	CG9200 CG10399 CG9188 CG3433 CG4494 CG8749
732	1	4	0	0	0	0	1	4	1	1	2L	6973530	6985013	CG9138
733	4	3	0	1	0	2	4	0	4	5	2L	7013496	7028959	CG13776 CG31628 CG3440 CG31908 CG3476
734	1	2	0	0	1	0	0	2	3	4	2L	7030480	7054854	CG9100 CG11266 CG13777 CG31630
735	2	1	0	0	0	1	2	0	6	7	2L	7056306	7156697	CG13778 CG13779 CG8902 CG11289 CG13780 CG31629 CG13783
736	2	2	1	0	1	0	0	2	3	4	2L	7182236	7204259	CG4495 CG4496 CG4497 CG4502
737	2	1	0	0	0	0	2	1	11	11	2L	7205250	7388248	CG13784 CG4567 CG31906 CG4675 CG13786 CG4698 CG4889 CG4969 CG4971 CG5125 CG5149
738	1	1	0	1	0	0	1	0	12	12	2L	7388676	7462247	CG5155 CG5160 CG5171 CG5177 CG5181 CG5229 CG5261 CG5958 CG5973 CG12789 CG13787 CG13788
739	1	2	1	1	0	0	0	1	1	1	2L	7466550	7472205	CG6055
740	2	4	1	0	0	0	1	4	2	3	2L	7472505	7483823	CG15819 CG6441 CG6630
741	3	3	0	0	0	2	3	1	4	4	2L	7497805	7616528	CG33529 CG13790 CG13791 CG6739
742	2	1	0	0	1	0	1	1	3	5	2L	7643527	7692676	CG13792 CG6772 CG6976 CG18585 CG7025
743	1	1	0	0	0	1	1	0	1	1	2L	7693800	7701585	CG7052
744	1	2	0	0	1	0	0	2	3	3	2L	7702807	7732656	CG7068 CG7075 CG13796
745	1	2	0	1	0	1	1	0	4	4	2L	7734411	7747874	CG31904 CG7216 CG7214 CG7211
746	3	2	1	0	2	0	0	2	4	5	2L	7752168	7778027	CG7203 CG7196 CG14538 CG7191 CG7179
747	2	2	0	0	0	0	2	2	2	2	2L	7781503	7786063	CG7164 CG7154
748	1	1	0	0	0	0	1	1	5	5	2L	7786157	7810697	CG7149 CG7144 CG14536 CG7138 CG7134
749	1	2	0	0	0	0	1	2	1	1	2L	7811440	7820774	CG7123
750	1	2	0	0	0	1	1	1	2	2	2L	7821534	7827252	CG7115 CG7111
751	4	3	1	0	1	0	2	3	9	10	2L	7827743	7976190	CG7109 CG14537 CG14535 CG14534 CG7105 CG7104 CG7102 CG18591 CG7093 CG7233
752	5	1	1	0	1	0	3	1	3	3	2L	7983920	7998139	CG7231 CG7228 CG7227
753	5	2	0	0	0	0	5	2	2	2	2L	8011407	8028379	CG7356 CG7367
754	2	2	0	0	0	0	2	2	2	2	2L	8029464	8038517	CG7380 CG7392
755	1	4	0	0	0	0	1	4	1	2	2L	8041115	8042856	CG7429 CG7424
756	2	1	0	0	0	0	2	1	5	6	2L	8043715	8124001	CG7466 CG14472 CG7562 CG7586 CG31605 CG8683
757	2	6	0	0	0	2	2	4	1	1	2L	8127024	8133990	CG8668
758	3	1	0	0	0	1	3	0	1	3	2L	8134247	8159575	CG8552 CG31607 CG31900
759	1	1	0	0	1	0	0	1	2	2	2L	8159839	8162325	CG8506 CG8498
760	1	1	0	0	0	0	1	1	2	3	2L	8173070	8196893	CG8486 CG18103 CG8475
761	1	1	0	0	0	0	1	1	4	5	2L	8197196	8210920	CG8460 CG8455 CG8451 CG8419 CG8409
762	1	3	0	0	0	1	1	2	6	7	2L	8211363	8220737	CG8396 CG8372 CG8360 CG8353 CG8349 CG8292 CG8282
763	2	1	0	0	0	0	2	1	5	5	2L	8221119	8302983	CG8222 CG14277 CG8086 CG8049 CG7870
764	1	2	0	0	0	0	1	2	1	1	2L	8303433	8305376	CG7851
765	2	3	0	0	0	0	2	3	2	5	2L	8305590	8316862	CG7840 CG7830 CG7818 CG7810 CG7806
766	2	1	0	0	0	0	2	1	1	1	2L	8316863	8319920	CG7795
767	1	1	0	0	0	0	1	1	1	2	2L	8320324	8325299	CG7787 CG7781
768	2	8	0	0	0	2	2	6	5	5	2L	8327458	8355173	CG14275 CG14274 CG14273 CG7778 CG31901
769	4	3	0	0	1	0	3	3	5	5	2L	8355674	8374257	CG7627 CG13389 CG13383 CG17291 CG17292
770	2	3	0	2	0	0	2	1	1	2	2L	8374481	8376777	CG17293 CG13390
771	2	2	1	2	0	0	1	0	1	1	2L	8377051	8378208	CG17294
772	2	1	2	0	0	0	0	1	3	4	2L	8378256	8384132	CG13391 CG13392 CG17295 CG13393
773	1	1	0	0	0	1	1	0	3	3	2L	8384467	8399972	CG13384 CG17814 CG13386
774	1	1	0	0	1	0	0	1	4	4	2L	8401446	8415245	CG13396 CG13387 CG13397 CG13398
775	2	1	0	0	0	1	2	0	2	2	2L	8415690	8433598	CG13388 CG17610
776	1	3	0	0	1	0	0	3	3	4	2L	8434058	8445660	CG13400 CG13399 CG10890 CG31897
777	3	5	0	0	0	0	3	5	1	1	2L	8445861	8449571	CG13401
778	4	1	0	1	0	0	4	0	7	7	2L	8449683	8514864	CG17608 CG9233 CG13087 CG10595 CG13094 CG13096 CG13097
779	2	2	2	0	0	0	0	2	1	2	2L	8515098	8517377	CG13089 CG13098
780	2	1	0	0	0	0	2	1	1	1	2L	8517446	8519180	CG13090
781	1	1	0	0	0	0	1	1	2	2	2L	8521899	8528618	CG10593 CG18042
782	1	2	0	0	0	1	1	1	1	1	2L	8529143	8541462	CG17834
783	3	1	1	0	1	0	1	1	1	1	2L	8543333	8667428	CG18405
784	1	1	0	0	0	0	1	1	2	2	2L	8672043	8679782	CG9280 CG9287
785	1	1	0	1	0	0	1	0	2	2	2L	8681403	8685954	CG9289 CG9296
786	1	3	1	1	0	2	0	0	1	1	2L	8686280	8687034	CG9298
787	2	2	0	2	2	0	0	0	3	3	2L	8687281	8735793	CG9310 CG9314 CG12437
788	2	1	2	0	0	0	0	1	11	12	2L	8752400	8943264	CG12438 CG18024 CG32986 CG32987 CG32983 CG9483 CG15867 CG9487 CG9494 CG9496 CG9510 CG9515
789	3	1	0	0	2	0	1	1	1	1	2L	8943454	8951200	CG9520
790	1	3	0	1	0	0	1	2	9	10	2L	8953481	8993310	CG31886 CG9525 CG32985 CG32984 CG18088 CG9541 CG13101 CG18662 CG9552 CG9555
791	3	2	2	0	0	1	1	1	16	19	2L	8994463	9330033	CG17906 CG9556 CG18661 CG9564 CG9568 CG13102 CG9582 CG31708 CG12439 CG31609 CG13106 CG32982 CG13108 CG9586 CG13109 CG17009 CG4454 CG3694 CG17005
792	2	3	0	2	1	0	1	1	2	2	2L	9330767	9341625	CG3738 CG3747
793	2	5	1	2	0	3	1	0	7	7	2L	9373025	9435341	CG13111 CG4450 CG3752 CG3759 CG3763 CG4435 CG3766
794	2	3	1	0	1	2	0	1	2	2	2L	9435510	9463293	CG3769 CG3779
795	3	2	1	0	1	1	1	1	2	2	2L	9491918	9520714	CG4422 CG33298
796	2	2	0	1	0	0	2	1	1	1	2L	9521215	9540045	CG3811
797	2	2	1	0	0	0	1	2	4	4	2L	9540644	9547297	CG17855 CG3818 CG13113 CG13114
798	1	3	0	0	0	0	1	3	1	1	2L	9547762	9566750	CG4405
799	2	1	0	0	0	0	2	1	7	8	2L	9568892	9623115	CG3838 CG4389 CG12245 CG3841 CG4382 CG3858 CG31884 CG3881
800	1	3	0	0	0	1	1	2	3	3	2L	9641350	9699293	CG15828 CG33299 CG4379
801	3	2	0	1	1	0	2	1	11	15	2L	9699834	9775030	CG3949 CG3959 CG4364 CG18660 CG13116 CG13117 CG3998 CG4079 CG4008 CG13120 CG4017 CG17633 CG13121 CG34059 CG34058
802	3	1	2	0	0	1	1	0	1	1	2L	9782390	9788496	CG4026
803	2	6	0	0	2	1	0	5	3	3	2L	9790952	9886214	CG4036 CG13123 CG4128
804	6	3	2	0	1	0	3	3	2	3	2L	9888034	9893419	CG4535 CG4537 CG5924
805	1	2	0	0	0	0	1	2	1	1	2L	9895289	9896106	CG4539
806	1	1	0	0	0	0	1	1	1	1	2L	9896263	9897542	CG5920
807	2	2	0	0	0	0	2	2	10	12	2L	9903386	9933092	CG13124 CG5899 CG4602 CG4600 CG5885 CG4598 CG4594 CG4592 CG13125 CG31711 CG31878 CG31876
808	1	6	0	0	0	1	1	5	28	32	2L	9934749	10202233	CG31712 CG31713 CG4619 CG5853 CG13126 CG4709 CG5846 CG4658 CG5850 CG5838 CG4651 CG4722 CG31755 CG4747 CG4758 CG13131 CG4778 CG33302 CG4799 CG4804 CG31714 CG13133 CG13134 CG13128 CG13129 CG12441 CG34048 CG13136 CG4839 CG5772 CG18145 CG4897
809	5	4	0	1	0	1	5	2	1	1	2L	10419211	10420612	CG5313
810	3	5	0	0	0	2	3	3	2	3	2L	10423315	10428159	CG5168 CG5352 CG5183
811	3	3	0	0	0	0	3	3	1	2	2L	10431344	10435679	CG5193 CG5337
812	3	6	0	0	1	1	2	5	1	1	2L	10435991	10437317	CG5198
813	4	3	0	0	0	0	4	3	1	1	2L	10437551	10439244	CG5203
814	5	3	0	1	2	0	3	2	7	8	2L	10439529	10488623	CG13142 CG6232 CG34042 CG6206 CG31719 CG6187 CG6176 CG7456
815	3	1	0	0	1	1	2	0	1	2	2L	10507117	10510461	CG6094 CG7384
816	2	2	0	0	2	0	0	2	1	1	2L	10511252	10517216	CG7400
817	1	2	0	1	0	0	1	1	15	17	2L	10517337	10728560	CG6098 CG6113 CG18301 CG18302 CG31721 CG6138 CG7329 CG31872 CG18284 CG17104 CG7299 CG17108 CG7300 CG7279 CG17116 CG6415 CG6431
818	2	2	1	0	0	0	1	2	2	3	2L	10728975	10732406	CG6443 CG17118 CG6750
819	1	1	0	0	0	0	1	1	2	2	2L	10732818	10736053	CG6444 CG6743
820	1	1	0	0	0	0	1	1	2	2	2L	10737347	10743934	CG12299 CG6729
821	1	1	0	1	0	0	1	0	2	2	2L	10744075	10764972	CG17124 CG6495
822	1	2	1	0	0	0	0	2	9	11	2L	10765562	10850340	CG6720 CG6724 CG17127 CG31869 CG31870 CG6713 CG6700 CG17139 CG17140 CG17137 CG6647
823	2	1	0	0	0	1	2	0	3	4	2L	10851332	10862015	CG17085 CG17086 CG6627 CG6521
824	1	4	0	0	1	1	0	3	7	8	2L	10870240	10970275	CG12517 CG31723 CG14071 CG14070 CG7309 CG14069 CG33507 CG33129
825	2	6	0	1	0	0	2	5	5	5	2L	10982205	11004122	CG6122 CG12253 CG16833 CG6137 CG6141
826	4	2	1	2	0	0	3	0	5	7	2L	11014031	11090782	CG31868 CG4605 CG14913 CG14915 CG14919 CG14920 CG16854
827	1	2	1	0	0	1	0	1	5	7	2L	11091446	11120314	CG4705 CG6181 CG6192 CG4713 CG6201 CG14916 CG6230
828	1	2	0	1	0	0	1	1	2	4	2L	11120641	11130645	CG14921 CG6249 CG4738 CG6258
829	4	1	3	1	0	0	1	0	3	4	2L	11130741	11148875	CG4751 CG4779 CG33114 CG31867
830	1	12	1	6	0	0	0	6	13	15	2L	11151506	11499119	CG6287 CG33305 CG6320 CG16874 CG4788 CG4807 CG32830 CG33694 CG33695 CG4851 CG16928 CG14925 CG4881 CG6464 CG6488
831	7	2	1	0	0	0	6	2	6	6	2L	11523300	11744161	CG31705 CG31706 CG4977 CG6614 CG4983 CG12602
832	1	3	0	0	0	0	1	3	2	2	2L	11788676	11792365	CG14931 CG14936
833	1	1	0	0	0	0	1	1	2	2	2L	11792402	11809433	CG14937 CG14938
834	1	1	0	0	0	0	1	1	6	13	2L	11810092	11946805	CG14939 CG14940 CG14941 CG31757 CG31704 CG31758 CG14933 CG14934 CG14935 CG14943 CG14944 CG5006 CG16963
835	1	2	0	0	0	1	1	1	2	2	2L	11982003	11988035	CG16965 CG6686
836	3	1	0	0	1	1	2	0	3	3	2L	11988735	11992827	CG12314 CG16969 CG5202
837	1	2	0	0	1	0	0	2	3	3	2L	11992906	11999317	CG31866 CG18789 CG18787
838	3	1	0	0	0	0	3	1	1	2	2L	11999654	12002276	CG12264 CG6746
839	1	2	0	0	0	0	1	2	2	2	2L	12008376	12020938	CG5279 CG6734
840	1	2	0	0	0	1	1	1	2	3	2L	12027440	12038339	CG5304 CG18788 CG6756
841	2	1	0	0	1	0	1	1	2	2	2L	12038613	12045200	CG6766 CG6785
842	1	5	0	0	0	1	1	4	2	2	2L	12045346	12048918	CG6770 CG6792
843	2	2	0	0	0	0	2	2	4	6	2L	12125098	12170656	CG17211 CG17212 CG17213 CG31760 CG31860 CG6583
844	1	2	0	0	0	1	1	1	1	1	2L	12170657	12171196	CG17217
845	2	2	0	0	1	1	1	1	8	9	2L	12172984	12427663	CG17218 CG6579 CG31762 CG31761 CG31763 CG6504 CG31764 CG6405 CG5446
846	2	1	0	0	1	0	1	1	10	14	2L	12428032	12686313	CG6388 CG5435 CG5442 CG6382 CG5427 CG5421 CG6417 CG5461 CG31858 CG31857 CG15489 CG6246 CG12287 CG15485
847	1	1	0	0	0	0	1	1	2	2	2L	12690325	12694984	CG5525 CG5780
848	1	1	0	0	0	1	1	0	1	2	2L	12695038	12698917	CG6167 CG5781
849	3	2	2	0	1	1	0	1	2	2	2L	12699061	12704423	CG17036 CG5776
850	3	1	1	0	1	0	1	1	2	2	2L	12704723	12708684	CG12292 CG6180
851	1	2	0	0	0	0	1	2	3	3	2L	12708785	12744809	CG5787 CG5792 CG6214
852	1	1	0	0	0	0	1	1	17	17	2L	12760456	13178978	CG15483 CG12283 CG16800 CG3762 CG5075 CG12404 CG12403 CG5092 CG9934 CG9933 CG9932 CG5182 CG5204 CG9828 CG5216 CG16975 CG5439
853	2	7	0	1	0	3	2	3	2	4	2L	13179245	13191949	CG5287 CG31849 CG5458 CG16974
854	2	2	0	0	0	0	2	2	2	4	2L	13192206	13211814	CG5682 CG16972 CG5547 CG15482
855	1	2	0	1	0	0	1	1	2	3	2L	13216290	13222315	CG9426 CG5705 CG15481
856	3	1	2	0	0	0	1	1	8	8	2L	13222561	13250193	CG16812 CG15480 CG16813 CG16815 CG15479 CG5867 CG5945 CG16820
857	1	1	0	1	0	0	1	0	2	2	2L	13255637	13258294	CG31728 CG31851
858	2	1	2	0	0	0	0	1	2	5	2L	13259147	13286409	CG31730 CG6043 CG31848 CG6108 CG9414
859	1	1	0	0	0	0	1	1	5	6	2L	13286790	13348959	CG6116 CG31729 CG15639 CG16825 CG16970 CG16826
860	1	1	0	0	0	0	1	1	5	5	2L	13350867	13368936	CG9395 CG9377 CG12396 CG6523 CG31852
861	1	1	0	0	0	0	1	1	5	5	2L	13369233	13378546	CG31855 CG9306 CG9305 CG6565 CG9302
862	1	1	0	0	0	1	1	0	3	3	2L	13378897	13387299	CG6699 CG6866 CG9293
863	1	3	0	2	1	0	0	1	12	12	2L	13387636	13500424	CG7099 CG9282 CG16957 CG7110 CG9271 CG16848 CG16956 CG7121 CG9267 CG16849 CG16850 CG31847
864	6	5	4	0	0	2	2	3	1	11	2L	13502656	13547771	CG9239 CG33640 CG33641 CG33642 CG33643 CG33644 CG33645 CG15638 CG16852 CG9263 CG16853
865	9	12	2	4	1	4	6	4	7	8	2L	13550141	13746401	CG7147 CG9031 CG18507 CG31814 CG7311 CG9014 CG31813 CG33697
866	1	1	0	0	0	0	1	1	3	4	2L	13771087	13783457	CG7364 CG9008 CG7393 CG16890
867	1	1	0	0	0	0	1	1	1	1	2L	13784170	13790569	CG31731
868	1	1	0	0	0	0	1	1	4	5	2L	13790963	13812686	CG16863 CG7578 CG7820 CG16889 CG16865
869	2	1	0	0	0	0	2	1	3	3	2L	13813828	13827793	CG7793 CG7811 CG8987
870	3	2	0	2	0	0	3	0	1	1	2L	13827932	13829739	CG8978
871	1	1	1	0	0	0	0	1	6	15	2L	13829856	13911640	CG7833 CG33649 CG33650 CG7885 CG31842 CG31811 CG33307 CG33306 CG8997 CG7916 CG7953 CG7968 CG8954 CG8827 CG16869
872	1	1	0	0	0	0	1	1	21	27	2L	13914725	14328265	CG17988 CG16886 CG16885 CG16884 CG31841 CG31765 CG33119 CG31839 CG34003 CG33115 CG16873 CG8942 CG18146 CG8930 CG4501 CG16880 CG4500 CG18095 CG16876 CG32975 CG16879 CG15293 CG17341 CG32972 CG4551 CG15288 CG32970
873	1	2	0	1	0	0	1	1	1	1	2L	14328429	14333867	CG15287
874	2	2	1	0	0	0	1	2	3	4	2L	14334160	14351510	CG33090 CG15286 CG18124 CG7532
875	2	1	0	0	0	0	2	1	4	4	2L	14352590	14365699	CG7516 CG4212 CG7480 CG4215
876	1	2	0	1	0	1	1	0	6	6	2L	14387122	14549075	CG4220 CG15284 CG3474 CG15283 CG4491 CG4218
877	3	2	0	1	3	1	0	0	1	3	2L	14599776	14689311	CG3479 CG3484 CG3481
878	2	4	0	0	2	3	0	1	2	2	2L	14735951	14737766	CG31835 CG31775
879	3	1	0	0	1	0	2	1	2	2	2L	14758790	14763153	CG4697 CG4701
880	1	1	0	0	0	0	1	1	5	5	2L	14798263	14877581	CG33308 CG15279 CG4480 CG15278 CG4479
881	1	1	0	0	0	0	1	1	6	6	2L	14878030	15003333	CG4478 CG15277 CG33515 CG4482 CG10846 CG4140
882	1	1	0	0	0	0	1	1	2	2	2L	15003748	15005526	CG4185 CG4103
883	1	1	0	0	0	0	1	1	2	3	2L	15005870	15028120	CG3688 CG15274 CG33310
884	1	1	0	0	0	0	1	1	3	4	2L	15031400	15053777	CG4182 CG4180 CG3497 CG7595
885	1	6	0	0	0	1	1	5	7	10	2L	15054848	15243761	CG3710 CG3506 CG4170 CG33678 CG15270 CG15269 CG3647 CG4168 CG3994 CG33911
886	1	1	0	0	0	0	1	1	13	13	2L	15252580	15490133	CG15266 CG31732 CG11861 CG15261 CG15262 CG15259 CG3758 CG15258 CG18482 CG4158 CG4161 CG3956 CG15257
887	1	2	0	2	0	0	1	0	6	6	2L	15495039	15610753	CG4162 CG15256 CG4192 CG15255 CG11864 CG15254
888	2	2	2	2	0	0	0	0	2	2	2L	15611448	15613723	CG15253 CG11865
889	3	3	3	1	0	0	0	2	3	3	2L	15618057	15628554	CG17868 CG7631 CG18480
890	2	1	0	0	0	1	2	0	3	3	2L	15643764	15746983	CG4587 CG3938 CG13240
891	2	1	0	0	2	1	0	0	4	5	2L	15748182	15769048	CG4152 CG3903 CG3793 CG18801 CG31826
892	1	1	0	0	1	0	0	1	11	16	2L	15848602	16044555	CG13243 CG4767 CG31824 CG31735 CG31823 CG31821 CG7644 CG4793 CG12448 CG18063 CG31736 CG10839 CG4838 CG13245 CG31820 CG4824
893	1	1	0	0	0	0	1	1	2	2	2L	16045924	16091873	CG4846 CG4891
894	1	1	0	0	0	0	1	1	2	2	2L	16129437	16133442	CG4892 CG4959
895	1	2	0	0	0	0	1	2	2	2	2L	16166586	16241388	CG4894 CG12455
896	1	1	0	0	0	0	1	1	1	1	2L	16241755	16253532	CG4993
897	2	3	0	0	0	0	2	3	1	2	2L	16253922	16257804	CG4930 CG4965
898	2	3	0	0	0	1	2	2	2	2	2L	16258052	16283657	CG4935 CG7664
899	7	1	0	0	1	0	6	1	5	6	2L	16284221	16298881	CG4132 CG13258 CG4163 CG5876 CG17328 CG5869
900	3	3	0	0	0	0	3	3	4	6	2L	16299189	16321372	CG4249 CG5861 CG4214 CG5855 CG4274 CG5848
901	3	5	0	0	0	2	3	3	1	2	2L	16323000	16325057	CG4278 CG5818
902	8	1	3	0	2	0	3	1	7	9	2L	16338357	16481599	CG5813 CG4455 CG5809 CG17330 CG5888 CG4472 CG4475 CG4559 CG4952
903	1	1	0	0	0	0	1	1	3	3	2L	16487471	16539194	CG4599 CG5953 CG31816
904	3	2	0	0	0	0	3	2	6	7	2L	16545229	16676674	CG5968 CG13260 CG31815 CG4631 CG31738 CG5996 CG4711
905	6	1	0	0	3	0	3	1	1	1	2L	16676675	16695855	CG17161
906	1	1	0	0	0	1	1	0	1	5	2L	16711787	16726889	CG13263 CG17903 CG17332 CG31812 CG17996
907	2	2	1	0	1	0	0	2	2	3	2L	16727142	16734301	CG17331 CG17904 CG11397
908	2	1	0	0	0	1	2	0	10	11	2L	16734781	16797514	CG17905 CG13277 CG17912 CG17914 CG13278 CG17927 CG13279 CG17928 CG13270 CG13271 CG17932
909	1	2	0	1	1	1	0	0	3	6	2L	16797950	16829829	CG13280 CG13272 CG31991 CG13281 CG31739 CG13282
910	1	3	0	1	1	1	0	1	1	1	2L	16831189	16833147	CG13283
911	2	1	0	1	1	0	1	0	3	3	2L	16839121	16857348	CG13284 CG31809 CG6012
912	1	2	1	0	0	0	0	2	1	1	2L	16874530	16875204	CG32832
913	2	1	0	0	0	0	2	1	2	2	2L	16875446	16883870	CG31743 CG6115
914	3	2	0	0	1	0	2	2	5	6	2L	16884932	17008983	CG15133 CG15134 CG4841 CG33179 CG31806 CG6304
915	1	1	0	0	0	0	1	1	4	4	2L	17098361	17288136	CG31784 CG12621 CG15138 CG6380
916	1	2	0	1	0	0	1	1	1	1	2L	17363438	17380076	CG6860
917	2	2	1	0	0	0	1	2	5	8	2L	17380862	17454703	CG5020 CG6840 CG15141 CG31803 CG6794 CG5043 CG6667 CG5050
918	2	5	0	0	0	1	2	4	1	1	2L	17456763	17469184	CG6605
919	2	3	0	0	0	0	2	3	2	2	2L	17469412	17473815	CG5094 CG6582
920	2	1	0	0	0	0	2	1	3	3	2L	17474370	17480231	CG6549 CG5110 CG6453
921	2	1	0	0	0	0	2	1	20	22	2L	17480447	18110950	CG5131 CG6433 CG15142 CG6412 CG5526 CG15143 CG7094 CG5545 CG6870 CG5559 CG15147 CG7100 CG7527 CG5674 CG15148 CG31740 CG15151 CG5711 CG31783 CG31741 CG15153 CG15152
922	1	1	0	0	0	1	1	0	2	3	2L	18118475	18134139	CG5758 CG31785 CG7210
923	1	2	0	1	1	0	0	1	1	1	2L	18134597	18148339	CG15154
924	2	2	0	0	0	0	2	2	1	2	2L	18151972	18154605	CG5783 CG7200
925	1	2	0	2	0	0	1	0	7	9	2L	18157358	18388519	CG31746 CG7180 CG15157 CG31802 CG31786 CG31787 CG5790 CG5803 CG7157
926	1	1	1	0	0	0	0	1	3	3	2L	18438427	18450516	CG10305 CG12750 CG10302
927	2	2	0	0	0	0	2	2	4	4	2L	18468882	18509266	CG10283 CG10176 CG10275 CG10178
928	1	3	0	1	0	0	1	2	7	8	2L	18513422	18608171	CG10211 CG10231 CG15159 CG15160 CG10393 CG10413 CG10333 CG10414
929	3	3	1	0	0	2	2	1	4	5	2L	18610268	18671023	CG15161 CG15162 CG10391 CG31790 CG31791
930	1	1	0	1	0	0	1	0	4	6	2L	18673132	18694500	CG31751 CG10387 CG10385 CG10336 CG10383 CG10338
931	1	2	1	0	0	0	0	2	2	3	2L	18694648	18700386	CG10341 CG10376 CG10343
932	5	2	0	0	1	0	4	2	1	1	2L	18700499	18701628	CG10373
933	1	2	0	1	0	0	1	1	3	3	2L	18702190	18709464	CG10372 CG10346 CG10369
934	3	1	0	1	0	0	3	0	8	9	2L	18710759	18827070	CG10348 CG15167 CG31753 CG10570 CG17325 CG17324 CG17323 CG17322 CG17597
935	1	5	1	0	0	0	0	5	2	2	2L	18827145	18835596	CG17320 CG10600
936	4	1	2	0	1	1	1	0	1	1	2L	18837328	18840486	CG33120
937	2	3	0	0	2	0	0	3	2	2	2L	18841113	18855141	CG17321 CG10602
938	2	4	0	0	0	1	2	3	2	2	2L	18855444	18939877	CG10619 CG18397
939	3	1	0	0	0	0	3	1	5	5	2L	18944826	18964650	CG10428 CG10679 CG10621 CG10623 CG10637
940	1	7	0	0	0	2	1	5	6	7	2L	18964961	18991859	CG18398 CG10639 CG10431 CG10641 CG15168 CG15170 CG10650
941	4	4	0	0	1	0	3	4	2	2	2L	19023641	19029424	CG10446 CG10653
942	2	3	0	0	0	1	2	2	1	1	2L	19029586	19030385	CG31800
943	2	1	0	0	1	0	1	1	2	3	2L	19037643	19044108	CG10449 CG15173 CG10473
944	1	2	0	0	0	0	1	2	1	2	2L	19045008	19047535	CG10470 CG10655
945	1	3	0	0	0	1	1	2	3	3	2L	19047759	19058978	CG10484 CG10492 CG10493
946	5	3	0	0	1	0	4	3	1	1	2L	19059254	19060655	CG10495
947	3	6	0	0	0	2	3	4	3	3	2L	19060922	19070075	CG17343 CG10702 CG17572
948	2	1	0	0	1	0	1	1	7	9	2L	19075163	19127881	CG10699 CG17344 CG10501 CG10561 CG10697 CG10691 CG10689 CG10563 CG10687
949	1	1	0	0	0	0	1	1	16	19	2L	19128258	19426199	CG17347 CG10685 CG10719 CG17566 CG10739 CG17348 CG17564 CG10750 CG17559 CG13086 CG17349 CG17350 CG15825 CG17549 CG17544 CG31794 CG9976 CG33533 CG13085
950	1	3	0	0	0	1	1	2	3	4	2L	19426586	19439330	CG9987 CG9994 CG10237 CG10234
951	3	2	0	0	1	0	2	2	5	5	2L	19439331	19480631	CG9999 CG10223 CG10026 CG10034 CG10195
952	1	1	0	0	0	0	1	1	7	8	2L	19480902	19504689	CG13084 CG13083 CG10194 CG18094 CG10189 CG10084 CG10123 CG10188
953	4	1	0	0	1	0	3	1	3	3	2L	19504878	19522253	CG10186 CG10132 CG10166
954	2	2	0	0	0	0	2	2	1	2	2L	19522615	19528921	CG10137 CG10165
955	2	3	0	1	0	0	2	2	5	7	2L	19529402	19552384	CG33116 CG31697 CG13082 CG13081 CG10360 CG10337 CG10363
956	6	2	3	0	0	0	3	2	4	4	2L	19560267	19575041	CG13078 CG13077 CG10334 CG10364
957	3	2	0	0	0	1	3	1	1	2	2L	19575042	19578426	CG10268 CG10263
958	4	1	0	0	2	0	2	1	1	1	2L	19578955	19579856	CG10262
959	2	1	0	0	0	0	2	1	2	3	2L	19580188	19727491	CG10366 CG10443 CG31695
960	1	1	0	0	0	0	1	1	10	10	2L	19728097	19791758	CG10462 CG10447 CG10631 CG10628 CG10463 CG31692 CG10604 CG10538 CG10466 CG10528
961	1	5	0	0	0	0	1	5	9	11	2L	19823203	19967745	CG13958 CG33316 CG10481 CG13964 CG10662 CG10664 CG13965 CG16772 CG18806 CG10658 CG13966
962	1	2	0	2	0	0	1	0	2	2	2L	20023844	20056904	CG13968 CG10726
963	1	1	1	0	0	0	0	1	2	4	2L	20057406	20071408	CG10895 CG10728 CG13969 CG16784
964	3	1	0	0	0	0	3	1	1	3	2L	20071685	20087149	CG10718 CG10746 CG10747
965	2	2	0	0	0	0	2	2	1	2	2L	20087622	20089775	CG10721 CG10756
966	2	1	0	0	0	0	2	1	1	1	2L	20089893	20092182	CG10722
967	2	3	0	0	0	0	2	3	3	3	2L	20092360	20099992	CG10757 CG10723 CG13970
968	1	1	0	0	0	1	1	0	2	3	2L	20282300	20337603	CG12617 CG10076 CG10922
969	1	1	0	0	1	0	0	1	4	4	2L	20341563	20404511	CG10043 CG16798 CG10947 CG10949
970	1	6	0	0	0	1	1	5	5	5	2L	20404654	20440131	CG10954 CG15130 CG31688 CG31683 CG31687
971	5	1	0	0	0	0	5	1	5	6	2L	20629896	20646768	CG17470 CG2488 CG2608 CG2611 CG2478 CG2614
972	1	1	0	0	0	0	1	1	1	2	2L	20646769	20666901	CG31678 CG2615
973	1	1	0	0	0	0	1	1	3	3	2L	20669963	20714144	CG2617 CG1864 CG9316
974	1	2	0	0	0	0	1	2	1	1	2L	20714736	20717845	CG9317
975	1	2	0	0	0	0	1	2	2	2	2L	20718238	20727372	CG9318 CG2637
976	1	1	0	1	0	0	1	0	1	1	2L	20738527	20739933	CG9319
977	1	9	1	6	0	3	0	0	1	2	2L	20739993	20745584	CG9320 CG9323
978	1	2	0	0	1	0	0	2	2	3	2L	20745959	20776472	CG1768 CG1759 CG9324
979	2	2	0	0	0	0	2	2	1	1	2L	20776473	20784633	CG9326
980	5	1	0	0	2	0	3	1	5	5	2L	20797708	20820376	CG9328 CG33322 CG9331 CG31673 CG31674
981	1	5	0	1	0	2	1	2	9	9	2L	20820451	20910443	CG9333 CG31676 CG9335 CG9336 CG9338 CG31675 CG14401 CG9339 CG9342
982	2	6	0	0	1	1	1	5	1	1	2L	20912568	20913737	CG9273
983	4	1	1	0	1	1	2	0	9	10	2L	21040425	21091922	CG1762 CG9265 CG9264 CG33511 CG33510 CG33509 CG33508 CG9259 CG12050 CG9257
984	1	8	0	1	1	1	0	6	2	2	2L	21092192	21129945	CG9256 CG1099
985	1	1	0	0	0	0	1	1	2	3	2L	21194113	21208160	CG8681 CG8678 CG8679
986	1	2	0	0	0	0	1	2	1	2	2L	21208929	21221628	CG8677 CG31626
987	2	2	0	0	0	1	2	1	1	1	2L	21224830	21245814	CG8676
988	2	2	0	0	1	1	1	1	1	1	2L	21248752	21249880	CG8674
989	3	1	1	1	1	0	1	0	2	3	2L	21250554	21297599	CG8671 CG18362 CG31622
990	1	3	1	0	0	2	0	1	7	7	2L	21298447	21377940	CG8669 CG8667 CG8666 CG31623 CG31620 CG8665 CG8663
991	3	1	0	0	2	0	1	1	2	2	2L	21560971	21576948	CG3305 CG12548
992	4	1	1	0	1	0	2	1	5	5	2L	21602356	21664823	CG2201 CG2207 CG1506 CG1512 CG2225
993	1	2	0	0	0	0	1	2	1	1	2L	21665690	21669743	CG2238
994	1	7	0	2	0	3	1	2	1	1	2L	21672129	21716644	CG31619
995	4	1	1	0	1	0	2	1	1	1	2L	21728844	21745054	CG11628
996	1	1	0	0	0	0	1	1	13	13	2L	21745595	22097942	CG1416 CG31612 CG1374 CG11629 CG1421 CG1428 CG11634 CG12630 CG31601 CG31702 CG6691 CG15219 CG6675
997	1	1	0	0	0	0	1	1	2	2	2L	22109429	22117735	CG3651 CG15218
998	1	1	0	0	0	0	1	1	2	2	2L	22121944	22150580	CG6448 CG15216
999	1	2	0	0	0	0	1	2	1	1	2L	22153557	22156735	CG1832
1000	2	8	0	1	0	2	2	5	2	2	2L	22175481	22201858	CG5929 CG5922
B-cent	14	-	5	-	1	-	8	-
C-cent	-	7	-	3	-	1	-	3
1001	7	5	3	1	1	1	3	3	2	2	2R	975702	1180185	CG30440 CG1298
1002	3	5	0	0	0	2	3	3	1	1	2R	1205242	1207608	CG17337
1003	3	1	0	0	0	0	3	1	2	2	2R	1209495	1234218	CG8390 CG8376
1004	1	2	0	0	0	1	1	1	2	2	2R	1261916	1267779	CG12792 CG7791
1005	3	1	1	0	0	0	2	1	10	12	2R	1268256	1522141	CG7897 CG11163 CG12754 CG7796 CG14469 CG14470 CG7881 CG7838 CG11680 CG7873 CG14471 CG12051
1006	1	1	0	0	0	0	1	1	1	1	2R	1522142	1527537	CG7865
1007	2	1	0	0	0	1	2	0	2	2	2R	1533661	1547723	CG33131 CG14591
1008	1	1	0	0	1	0	0	1	1	1	2R	1550043	1552352	CG7861
1009	2	1	0	0	0	0	2	1	6	6	2R	1564745	1593008	CG7856 CG14593 CG7845 CG7849 CG14590 CG7843
1010	1	1	0	0	0	0	1	1	8	9	2R	1598168	1721506	CG1765 CG14589 CG8345 CG8343 CG11211 CG11212 CG30431 CG17994 CG8325
1011	1	1	0	0	0	0	1	1	2	2	2R	1721961	1762654	CG8276 CG12110
1012	1	4	0	0	0	0	1	4	3	3	2R	2014072	2144229	CG9397 CG9403 CG3161
1013	1	3	0	0	0	1	1	2	2	2	2R	2145460	2154174	CG3152 CG3274
1014	2	1	0	0	1	1	1	0	1	1	2R	2154230	2156893	CG3174
1015	1	1	0	0	1	0	0	1	1	1	2R	2160554	2164644	CG33134
1016	1	2	0	0	0	1	1	1	2	2	2R	2165046	2168263	CG30443 CG3183
1017	2	3	0	0	1	0	1	3	1	1	2R	2169141	2172437	CG3273
1018	1	3	0	0	0	0	1	3	1	1	2R	2172463	2173931	CG3189
1019	3	2	0	0	1	0	2	2	10	14	2R	2174082	2227678	CG15845 CG15908 CG9410 CG3194 CG3271 CG17266 CG9422 CG30445 CG15909 CG30446 CG3270 CG3403 CG3269 CG3409
1020	1	1	0	0	0	0	1	1	14	16	2R	2228158	2328818	CG9428 CG9430 CG9432 CG3268 CG3267 CG3265 CG3420 CG9436 CG3427 CG9438 CG15235 CG3283 CG15237 CG3450 CG3287 CG18584
1021	1	2	0	0	0	1	1	1	1	1	2R	2340171	2350173	CG15236
1022	2	1	0	0	1	0	1	1	6	6	2R	2373814	2436494	CG9446 CG9447 CG9453 CG9460 CG30158 CG3358
1023	1	1	0	0	0	1	1	0	2	6	2R	2438294	2486799	CG33558 CG33351 CG33350 CG33349 CG3567 CG30157
1024	1	1	0	0	1	0	0	1	3	5	2R	2487095	2516074	CG3572 CG30156 CG17002 CG18817 CG30159
1025	1	1	0	1	0	0	1	0	29	32	2R	2517031	2735193	CG30160 CG12847 CG12846 CG10106 CG12845 CG12142 CG12844 CG12843 CG33914 CG12143 CG12841 CG12840 CG2374 CG12839 CG12838 CG4471 CG4445 CG12832 CG12837 CG12836 CG12831 CG12833 CG12835 CG4486 CG12172 CG1865 CG1859 CG1857 CG11060 CG33140 CG30384 CG11084
1026	1	1	1	0	0	0	0	1	8	8	2R	2744652	2825163	CG1854 CG1851 CG11086 CG1850 CG1845 CG12165 CG11101 CG12164
1027	2	1	0	0	1	0	1	1	3	6	2R	2831367	2904962	CG17800 CG30500 CG30501 CG1708 CG11107 CG1712
1028	1	1	0	0	0	0	1	1	1	1	2R	2905359	2907761	CG1707
1029	2	1	0	0	0	0	2	1	1	1	2R	2910037	2919634	CG11166
1030	1	1	0	0	0	0	1	1	3	5	2R	2930845	2956439	CG11121 CG11145 CG11123 CG11124 CG30503
1031	3	2	0	0	0	0	3	2	3	4	2R	2956836	2970676	CG1669 CG30502 CG11125 CG11143
1032	4	2	0	0	1	0	3	2	1	1	2R	2972240	2975196	CG11141
1033	4	2	0	1	0	1	4	0	5	6	2R	2975197	3008279	CG11127 CG11139 CG11140 CG1624 CG1621 CG1620
1034	2	2	0	0	2	0	0	2	2	2	2R	3008514	3020389	CG1616 CG2146
1035	3	6	0	3	0	1	3	2	1	2	2R	3020390	3024537	CG12736 CG1605
1036	8	1	3	0	3	0	2	1	3	4	2R	3025883	3037521	CG1603 CG1602 CG2144 CG10667
1037	2	2	0	0	0	1	2	1	1	1	2R	3037931	3041098	CG1600
1038	2	2	0	0	1	1	1	1	1	1	2R	3047732	3050110	CG2137
1039	2	1	0	0	1	0	1	1	2	2	2R	3066686	3077562	CG2105 CG30499
1040	1	1	0	0	0	0	1	1	6	9	2R	3077683	3164596	CG30498 CG2093 CG1363 CG1360 CG2092 CG1358 CG30492 CG30494 CG1341
1041	2	1	0	0	0	0	2	1	2	4	2R	3164597	3175072	CG17985 CG30491 CG30495 CG2070
1042	1	2	0	0	0	0	1	2	2	3	2R	3175599	3180842	CG2065 CG2064 CG12042
1043	2	1	0	0	0	0	2	1	3	4	2R	3182363	3188165	CG12826 CG1577 CG12107 CG1406
1044	1	1	0	0	0	0	1	1	1	1	2R	3188880	3198897	CG1399
1045	1	1	0	0	0	0	1	1	1	2	2R	3211094	3215316	CG30493 CG30496
1046	1	2	0	0	0	0	1	2	1	1	2R	3216986	3221004	CG1389
1047	4	1	0	0	0	0	4	1	5	5	2R	3227692	3299953	CG1946 CG18812 CG30497 CG1555 CG11217
1048	1	2	0	0	0	0	1	2	1	2	2R	3305065	3318212	CG1925 CG1553
1049	2	4	0	0	0	1	2	3	4	4	2R	3318291	3335381	CG1891 CG1550 CG1882 CG1548
1050	2	1	0	0	1	0	1	1	2	3	2R	3337305	3342210	CG11205 CG18495 CG18853
1051	2	3	0	1	0	0	2	2	12	12	2R	3342324	3444199	CG30382 CG12822 CG12821 CG18654 CG12820 CG30377 CG12159 CG1877 CG15835 CG8791 CG30381 CG8729
1052	2	1	1	0	0	0	1	1	1	1	2R	3444239	3448668	CG8730
1053	1	5	0	2	0	3	1	0	3	6	2R	3448670	3458379	CG8728 CG30380 CG30379 CG14766 CG11165 CG30378
1054	1	6	0	0	1	3	0	3	1	1	2R	3458380	3467580	CG14764
1055	5	3	1	0	2	2	2	1	2	5	2R	3467581	3483862	CG2906 CG2915 CG2910 CG14763 CG8726
1056	3	2	0	1	2	0	1	1	7	7	2R	3483988	3525567	CG8725 CG11198 CG8722 CG11194 CG11191 CG8719 CG14762
1057	2	1	1	0	0	0	1	1	5	5	2R	3543446	3594183	CG18455 CG12769 CG8715 CG12770 CG8717
1058	2	1	0	1	0	0	2	0	3	4	2R	3594791	3610267	CG8714 CG17975 CG8713 CG8712
1059	1	1	1	0	0	0	0	1	3	3	2R	3610498	3634665	CG11210 CG8711 CG30372
1060	1	1	0	0	0	0	1	1	1	2	2R	3634829	3639055	CG2158 CG8710
1061	1	2	0	0	0	0	1	2	5	6	2R	3639444	3668463	CG2160 CG11508 CG2163 CG2297 CG8709 CG11546
1062	1	1	0	0	0	0	1	1	1	1	2R	3673492	3675326	CG8707
1063	5	1	0	0	1	0	4	1	4	5	2R	3675761	3685426	CG30373 CG2173 CG2183 CG11482 CG14757
1064	2	1	0	0	0	0	2	1	17	17	2R	3718331	3908111	CG33087 CG8704 CG8705 CG14760 CG2291 CG30376 CG30375 CG30371 CG14755 CG11635 CG30364 CG30366 CG30363 CG30362 CG2127 CG8701 CG11641
1065	1	2	0	2	0	0	1	0	5	5	2R	3908206	3947831	CG2121 CG2038 CG11650 CG8697 CG2043
1066	2	2	2	2	0	0	0	0	3	4	2R	3949470	3959281	CG2044 CG2110 CG2060 CG8696
1067	3	1	3	1	0	0	0	0	1	1	2R	3959282	3961558	CG2062
1068	2	5	2	0	0	1	0	4	8	8	2R	3965445	4083958	CG8694 CG8695 CG8693 CG30359 CG30360 CG11669 CG30361 CG2397
1069	2	3	1	0	0	1	1	2	5	5	2R	4085181	4111744	CG14748 CG14747 CG14752 CG8736 CG8735
1070	2	3	0	0	1	0	1	3	1	2	2R	4112246	4125724	CG8643 CG8642
1071	2	1	0	0	0	0	2	1	2	2	2R	4127921	4137997	CG8639 CG14750
1072	1	1	0	1	0	0	1	0	4	4	2R	4139690	4194604	CG14749 CG8635 CG2411 CG8732
1073	1	3	1	0	0	0	0	3	9	10	2R	4203263	4235650	CG8579 CG8586 CG8738 CG8584 CG12376 CG14743 CG8577 CG14745 CG14767 CG30357
1074	3	1	0	1	0	0	3	0	3	6	2R	4236073	4367450	CG8411 CG8739 CG8740 CG33141 CG30352 CG30350
1075	1	1	1	0	0	0	0	1	4	5	2R	4372204	4412014	CG10844 CG8272 CG8269 CG8266 CG8262
1076	1	1	0	0	0	0	1	1	2	2	2R	4412376	4416604	CG13746 CG8261
1077	1	4	0	0	0	1	1	3	3	4	2R	4416655	4425939	CG8258 CG30349 CG8252 CG8251
1078	6	2	0	0	1	0	5	2	3	3	2R	4426341	4434564	CG11770 CG8248 CG8247
1079	2	1	0	0	0	0	2	1	2	2	2R	4434601	4438703	CG8243 CG8237
1080	1	3	0	0	0	1	1	2	3	3	2R	4438826	4445921	CG8235 CG8232 CG13749
1081	1	2	0	0	0	0	1	2	1	1	2R	4446430	4451566	CG13745
1082	1	1	0	0	0	0	1	1	4	5	2R	4452282	4464002	CG13748 CG8230 CG8229 CG33199 CG8226
1083	1	1	0	0	0	0	1	1	1	1	2R	4464156	4473449	CG8224
1084	2	1	0	0	0	0	2	1	5	5	2R	4474977	4525321	CG8216 CG8213 CG11824 CG8181 CG8172
1085	1	1	0	1	0	0	1	0	6	6	2R	4526319	4571719	CG13744 CG13747 CG8170 CG8196 CG8193 CG13743
1086	2	2	2	0	0	1	0	1	4	4	2R	4572436	4599370	CG8197 CG8084 CG8083 CG13742
1087	1	1	0	0	0	1	1	0	2	4	2R	4599674	4610280	CG12759 CG8080 CG13741 CG8078
1088	1	3	0	1	1	0	0	2	3	3	2R	4610383	4621536	CG8777 CG8075 CG8073
1089	3	1	1	0	0	1	2	0	2	2	2R	4623314	4627850	CG8070 CG8069
1090	1	1	0	1	1	0	0	0	2	3	2R	4627939	4643794	CG8068 CG11784 CG18659
1091	1	4	1	1	0	0	0	3	1	2	2R	4644352	4649763	CG8058 CG8057
1092	1	2	0	0	0	0	1	2	5	5	2R	4653957	4676763	CG8055 CG30342 CG30344 CG8008 CG8046
1093	1	3	0	0	0	0	1	3	2	3	2R	4677548	4688993	CG2412 CG8016 CG8014
1094	2	3	0	0	0	1	2	2	2	2	2R	4689677	4703908	CG8024 CG8026
1095	3	1	0	0	0	1	3	0	1	1	2R	4707027	4711685	CG1650
1096	2	3	0	0	2	0	0	3	1	1	2R	4716221	4718934	CG8027
1097	2	6	0	0	0	4	2	2	4	7	2R	4719376	4796910	CG8029 CG2040 CG1944 CG10842 CG10843 CG30343 CG2049
1098	3	2	0	0	1	0	2	2	2	2	2R	4803670	4820489	CG1975 CG2078
1099	2	2	0	0	0	2	2	0	3	3	2R	4829354	4910563	CG13739 CG13954 CG8801
1100	1	1	0	0	1	0	0	1	1	1	2R	4910902	4911567	CG13951
1101	1	3	0	0	0	0	1	3	2	2	2R	4912360	4929661	CG8804 CG8805
1102	3	2	0	0	0	0	3	2	8	8	2R	4938255	5015003	CG8808 CG11804 CG13952 CG33758 CG33757 CG13953 CG8809 CG1916
1103	2	2	0	0	0	0	2	2	4	4	2R	5021703	5049289	CG12933 CG12932 CG30336 CG30337
1104	2	5	0	0	0	2	2	3	6	7	2R	5056985	5096358	CG1888 CG12931 CG1809 CG1884 CG1874 CG1814 CG1868
1105	4	1	0	0	0	0	4	1	14	15	2R	5096480	5122097	CG1818 CG12929 CG1821 CG12928 CG1827 CG1825 CG12927 CG1863 CG33479 CG30338 CG30340 CG30339 CG1902 CG30000 CG12926
1106	1	4	0	0	0	0	1	4	8	10	2R	5123504	5318678	CG1794 CG1782 CG10459 CG1772 CG30004 CG1776 CG18345 CG1690 CG1688 CG1698
1107	1	1	0	0	0	0	1	1	3	3	2R	5323198	5330348	CG1648 CG1652 CG1656
1108	1	3	0	0	0	0	1	3	2	2	2R	5334890	5345361	CG1625 CG1623
1109	2	2	0	0	1	0	1	2	2	3	2R	5350246	5354322	CG12924 CG1665 CG1599
1110	2	5	0	2	0	0	2	3	3	5	2R	5354511	5368221	CG1667 CG1584 CG1519 CG1671 CG1516
1111	2	1	0	0	0	0	2	1	1	2	2R	5375633	5377396	CG30010 CG10536
1112	1	3	0	0	0	0	1	3	1	1	2R	5377462	5378347	CG1675
1113	9	1	0	0	1	1	8	0	4	5	2R	5410807	5471425	CG1441 CG2346 CG12140 CG1429 CG15863
1114	1	2	0	0	1	0	0	2	1	2	2R	5471426	5476875	CG12130 CG1418
1115	3	2	0	0	1	0	2	2	3	3	2R	5480773	5492592	CG12131 CG12134 CG2328
1116	3	1	0	0	1	0	2	1	2	2	2R	5500974	5537848	CG2331 CG15862
1117	1	3	0	1	0	2	1	0	2	3	2R	5538654	5546514	CG12128 CG1407 CG12129
1118	1	1	0	0	1	1	0	0	3	4	2R	5561296	5575526	CG2249 CG12918 CG1385 CG2264
1119	1	1	0	0	1	0	0	1	1	1	2R	5579030	5580507	CG1362
1120	1	1	0	0	0	0	1	1	1	2	2R	5580922	5587455	CG12920 CG1371
1121	1	1	0	1	0	0	1	0	1	1	2R	5590178	5596032	CG12919
1122	1	3	1	0	0	0	0	3	1	1	2R	5599387	5608229	CG2269
1123	2	1	0	1	0	0	2	0	2	2	2R	5610329	5621500	CG1381 CG17870
1124	1	6	1	0	0	2	0	4	1	1	2R	5621553	5629004	CG4001
1125	2	4	0	0	0	0	2	4	1	1	2R	5629506	5633272	CG11866
1126	3	2	0	0	0	0	3	2	1	1	2R	5633299	5634375	CG17753
1127	2	1	0	0	0	0	2	1	10	13	2R	5637159	5773089	CG30011 CG12917 CG33478 CG18011 CG33135 CG12214 CG33183 CG3454 CG12209 CG12914 CG12913 CG12210 CG12911
1128	1	3	0	1	0	0	1	2	13	14	2R	5778682	5939726	CG12910 CG18408 CG3298 CG12909 CG12905 CG12908 CG12904 CG12901 CG12900 CG12899 CG12898 CG12897 CG12405 CG12896
1129	3	1	1	0	0	0	2	1	3	4	2R	5941525	5974512	CG11763 CG12895 CG2204 CG18377
1130	1	1	0	0	0	0	1	1	1	1	2R	5977956	5980302	CG12892
1131	1	2	0	0	0	0	1	2	1	1	2R	5980432	5981374	CG11777
1132	2	2	0	0	0	0	2	2	6	7	2R	5981375	6161323	CG12891 CG11761 CG17765 CG12052 CG2368 CG11883 CG16728
1133	1	1	0	1	0	0	1	0	6	7	2R	6161632	6254283	CG11887 CG12934 CG11895 CG7576 CG12309 CG12338 CG7220
1134	1	2	1	0	0	0	0	2	3	3	2R	6254524	6324832	CG7614 CG33144 CG12340
1135	1	7	0	3	0	1	1	3	2	4	2R	6325300	6329237	CG12935 CG7637 CG12936 CG12341
1136	5	1	1	0	2	0	2	1	2	2	2R	6329458	6335780	CG7222 CG12342
1137	1	1	0	0	0	0	1	1	3	3	2R	6335871	6339170	CG12323 CG12938 CG12343
1138	1	2	0	0	0	0	1	2	2	3	2R	6339507	6354633	CG12325 CG12344 CG7686
1139	2	3	0	1	0	1	2	1	4	6	2R	6355001	6400799	CG30015 CG30016 CG6751 CG7704 CG11919 CG18003
1140	5	3	0	0	1	0	4	3	2	3	2R	6402722	6413790	CG30020 CG12942 CG7712
1141	3	5	0	1	0	4	3	0	5	5	2R	6414149	6615910	CG11979 CG12943 CG12944 CG7722 CG33473
1142	2	1	0	0	2	1	0	0	7	8	2R	6651835	6738389	CG13232 CG13229 CG13231 CG12391 CG13230 CG7734 CG9084 CG7736
1143	1	1	0	0	1	0	0	1	1	1	2R	6742364	6748408	CG30021
1144	1	2	0	0	0	0	1	2	14	14	2R	6749171	6782768	CG13218 CG13228 CG13227 CG13217 CG13216 CG13215 CG9080 CG13226 CG13225 CG9079 CG13224 CG9077 CG9076 CG13222
1145	1	1	0	0	0	0	1	1	9	13	2R	6782997	6813382	CG13214 CG9073 CG9070 CG9067 CG13221 CG9062 CG13220 CG13213 CG18335 CG12390 CG18336 CG13211 CG13210
1146	1	4	0	0	0	1	1	3	5	7	2R	6817828	6851884	CG7741 CG13208 CG12389 CG7745 CG13207 CG13206 CG13209
1147	5	3	0	0	1	0	4	3	5	5	2R	6875426	6887077	CG13201 CG12352 CG30030 CG13204 CG9035
1148	1	1	0	0	0	0	1	1	6	7	2R	6889886	6923992	CG13203 CG9033 CG13200 CG9027 CG30023 CG30022 CG7759
1149	1	1	0	0	0	0	1	1	2	2	2R	6927849	6958130	CG9023 CG7777
1150	2	2	0	0	0	0	2	2	6	6	2R	6958433	7134917	CG33472 CG7776 CG17835 CG9015 CG10897 CG9006
1151	3	1	0	0	0	0	3	1	2	2	2R	7136095	7161556	CG9005 CG9003
1152	2	2	0	0	0	0	2	2	1	3	2R	7168733	7195259	CG8998 CG13198 CG30035
1153	1	1	0	0	0	1	1	0	1	2	2R	7195380	7204666	CG8238 CG13196
1154	1	1	0	0	1	1	0	0	7	7	2R	7204834	7342704	CG8996 CG13197 CG13195 CG13194 CG13193 CG12443 CG13192
1155	1	3	0	0	1	0	0	3	3	3	2R	7343070	7368231	CG8991 CG8988 CG8271
1156	2	1	0	0	0	0	2	1	1	1	2R	7368526	7376766	CG8274
1157	1	4	0	0	0	1	1	3	2	2	2R	7378440	7382290	CG8986 CG18188
1158	1	1	0	0	0	0	1	1	8	10	2R	7383783	7484750	CG13185 CG13190 CG8983 CG8280 CG30038 CG8981 CG13189 CG13183 CG13188 CG8979
1159	1	5	0	0	0	1	1	4	4	4	2R	7486581	7504663	CG8290 CG33145 CG8975 CG8972
1160	1	1	0	0	0	0	1	1	1	1	2R	7505040	7507348	CG8298
1161	1	1	0	0	0	0	1	1	5	5	2R	7517385	7552167	CG8967 CG8964 CG8889 CG17509 CG8321
1162	2	2	0	0	0	0	2	2	7	7	2R	7553213	7634779	CG8340 CG8344 CG8357 CG8364 CG8888 CG13186 CG30040
1163	2	2	0	0	0	0	2	2	1	1	2R	7655291	7655969	CG8881
1164	2	3	0	0	0	0	2	3	2	2	2R	7656512	7660341	CG8378 CG13178
1165	3	3	0	1	0	0	3	2	5	8	2R	7661633	7694437	CG12367 CG8878 CG8407 CG8877 CG16747 CG8427 CG8439 CG8862
1166	2	1	0	0	0	0	2	1	12	14	2R	7696547	7813620	CG13176 CG13175 CG33964 CG16792 CG8453 CG8859 CG8457 CG8858 CG8857 CG8854 CG13170 CG13168 CG8472 CG13165
1167	1	4	0	1	0	2	1	1	6	7	2R	7814685	7842165	CG8850 CG13164 CG17739 CG30203 CG30046 CG13163 CG8841
1168	5	3	0	2	2	1	3	0	1	1	2R	7842581	7849729	CG8487
1169	2	1	1	0	1	0	0	1	4	4	2R	7851256	7860520	CG8490 CG34021 CG8493 CG8839
1170	3	1	0	0	0	0	3	1	12	12	2R	7887503	7925561	CG13160 CG30045 CG30042 CG13155 CG8501 CG8502 CG8836 CG13158 CG8505 CG8510 CG8511 CG30050
1171	1	4	0	0	0	2	1	2	5	5	2R	7925986	7938390	CG33626 CG33627 CG8515 CG13157 CG8834
1172	3	3	0	0	1	1	2	2	1	1	2R	7938892	7941371	CG8520
1173	2	2	0	0	1	0	1	2	1	1	2R	7944354	7947002	CG8831
1174	3	1	0	0	0	0	3	1	1	2	2R	7947809	7952754	CG8830 CG30051
1175	2	2	0	0	0	0	2	2	2	3	2R	7953242	7986114	CG8529 CG12369 CG8828
1176	1	1	0	0	0	0	1	1	5	5	2R	7986115	8017374	CG8545 CG8550 CG12370 CG8824 CG30044
1177	1	3	0	0	0	0	1	3	2	3	2R	8027437	8034825	CG8819 CG13151 CG8818
1178	5	2	0	0	1	0	4	2	1	3	2R	8044963	8080093	CG8581 CG33752 CG30056
1179	1	1	0	0	0	0	1	1	1	2	2R	8080131	8084942	CG33775 CG8587
1180	1	1	0	0	0	1	1	0	3	4	2R	8084943	8108799	CG8816 CG8592 CG8594 CG8815
1181	1	5	0	0	1	0	0	5	4	4	2R	8109490	8148193	CG8604 CG17759 CG30054 CG8811
1182	3	1	0	0	0	0	3	1	2	4	2R	8148581	8152068	CG33792 CG12372 CG33671 CG33672
1183	6	1	0	0	1	0	5	1	2	2	2R	8152563	8161045	CG8625 CG8785
1184	1	1	0	1	0	0	1	0	1	1	2R	8167212	8168389	CG8778
1185	1	2	1	0	0	0	0	2	2	2	2R	8168714	8175255	CG8632 CG8646
1186	2	2	0	0	0	0	2	2	3	3	2R	8175489	8202072	CG8776 CG8772 CG8771
1187	2	2	0	0	0	0	2	2	8	10	2R	8202516	8273430	CG13148 CG30053 CG30052 CG8768 CG12442 CG12488 CG8767 CG8766 CG12373 CG8764
1188	1	3	0	0	0	0	1	3	1	2	2R	8273453	8276674	CG8657 CG8759
1189	3	1	0	0	1	0	2	1	2	2	2R	8278019	8316997	CG12374 CG17579
1190	1	1	0	0	0	1	1	0	6	6	2R	8356743	8388010	CG17577 CG17584 CG17575 CG30488 CG17574 CG3644
1191	1	2	0	0	1	1	0	1	4	4	2R	8388691	8415302	CG3790 CG3798 CG3821 CG3830
1192	3	2	0	0	2	0	1	2	6	6	2R	8431904	8456278	CG3845 CG13319 CG3850 CG17019 CG13322 CG13320
1193	1	1	0	0	0	0	1	1	4	5	2R	8456279	8523721	CG3879 CG3884 CG13321 CG3886 CG3905
1194	1	1	0	0	0	0	1	1	5	5	2R	8562785	8648362	CG13323 CG13324 CG3915 CG3955 CG13326
1195	1	2	0	0	0	0	1	2	1	1	2R	8649026	8658727	CG17054
1196	2	1	0	0	0	0	2	1	2	3	2R	8658739	8674997	CG3969 CG33007 CG3991
1197	1	5	0	0	0	1	1	4	2	2	2R	8675645	8682513	CG4007 CG4604
1198	3	2	0	1	0	0	3	1	1	2	2R	8735397	8736885	CG4646 CG17059
1199	2	4	1	3	0	0	1	1	1	1	2R	8736886	8738335	CG4643
1200	4	2	3	0	0	0	1	2	1	2	2R	8738336	8746135	CG4654 CG4663
1201	7	1	0	0	1	0	6	1	11	11	2R	8755635	8893621	CG4688 CG4696 CG4712 CG4714 CG17041 CG17042 CG32843 CG4734 CG17047 CG17048 CG10814
1202	1	1	0	0	0	0	1	1	2	3	2R	8905760	8910539	CG17050 CG17049 CG4740
1203	1	1	0	0	0	0	1	1	1	1	2R	8910540	8915275	CG4744
1204	3	3	0	0	1	0	2	3	3	4	2R	8930882	8952704	CG17034 CG30060 CG4812 CG30061
1205	1	3	0	0	0	0	1	3	2	3	2R	8955218	8969300	CG4832 CG30062 CG4840
1206	3	2	0	1	1	0	2	1	2	2	2R	8969540	9001303	CG5912 CG5970
1207	2	2	1	1	0	0	1	1	3	3	2R	9001508	9018726	CG13329 CG6016 CG6033
1208	5	1	3	1	0	0	2	0	2	4	2R	9018727	9033353	CG17064 CG6061 CG6050 CG13330
1209	2	2	2	0	0	1	0	1	5	7	2R	9034143	9073254	CG33528 CG13331 CG13332 CG6145 CG33156 CG6155 CG13333
1210	2	1	0	0	1	1	1	0	2	2	2R	9087291	9109243	CG13335 CG6191
1211	1	1	0	0	1	0	0	1	2	2	2R	9109556	9114657	CG6197 CG18369
1212	2	1	0	0	0	0	2	1	14	18	2R	9124572	9370207	CG12464 CG17716 CG13337 CG18368 CG6220 CG6280 CG13338 CG13340 CG6305 CG12295 CG6315 CG13339 CG6329 CG6337 CG6347 CG6357 CG10808 CG6543
1213	1	2	0	0	0	0	1	2	2	3	2R	9372050	9377909	CG13345 CG13343 CG16935
1214	1	1	0	0	0	0	1	1	2	2	2R	9377919	9441410	CG13344 CG18076
1215	1	2	0	0	0	0	1	2	3	5	2R	9458441	9476311	CG6646 CG6671 CG30481 CG33155 CG13349
1216	3	1	0	0	0	0	3	1	1	1	2R	9477088	9483898	CG6692
1217	1	2	0	0	0	2	1	0	1	1	2R	9484254	9485809	CG13348
1218	3	1	0	0	3	0	0	1	3	3	2R	9487504	9499381	CG18568 CG6701 CG13350
1219	4	2	0	0	0	0	4	2	1	2	2R	9499559	9506593	CG8067 CG8085
1220	5	2	0	0	0	0	5	2	1	2	2R	9525105	9576263	CG8118 CG18371
1221	3	1	0	0	0	0	3	1	2	3	2R	9577386	9668590	CG30483 CG13353 CG8233
1222	1	3	0	1	0	0	1	2	1	2	2R	9669063	9673311	CG8241 CG13018
1223	3	3	1	0	0	1	2	2	1	1	2R	9673678	9675344	CG13016
1224	3	1	0	0	2	0	1	1	2	2	2R	9677342	9680776	CG12366 CG8309
1225	4	1	0	0	0	0	4	1	7	8	2R	9684763	9727272	CG18324 CG8331 CG8338 CG8367 CG30069 CG8394 CG8404 CG30071
1226	2	1	0	0	0	0	2	1	1	1	2R	9730098	9731490	CG8415
1227	1	1	0	0	0	0	1	1	1	2	2R	9734785	9750311	CG8468 CG8479
1228	1	2	0	1	0	0	1	1	1	1	2R	9750644	9754290	CG8485
1229	2	1	1	0	0	1	1	0	2	2	2R	9754800	9760929	CG8494 CG8503
1230	1	1	0	0	1	0	0	1	9	9	2R	9761829	9817216	CG8523 CG8542 CG8531 CG8536 CG8547 CG8553 CG8561 CG8585 CG8589
1231	1	1	0	0	0	0	1	1	2	2	2R	9840689	9866670	CG13942 CG8603
1232	1	1	0	1	0	0	1	0	3	3	2R	9867102	9875157	CG8613 CG8617 CG12505
1233	1	1	1	0	0	0	0	1	11	12	2R	9877957	9938510	CG8151 CG30070 CG30067 CG30073 CG30072 CG30074 CG13939 CG8422 CG10104 CG17385 CG10105 CG17386
1234	1	1	0	0	0	0	1	1	1	1	2R	9942199	9947198	CG10108
1235	2	2	0	0	0	0	2	2	2	2	2R	9957102	9980320	CG17388 CG17390
1236	3	1	0	0	0	0	3	1	2	2	2R	9996066	10018336	CG10109 CG10110
1237	1	1	0	0	0	1	1	0	1	1	2R	10018872	10027309	CG8787
1238	1	1	0	0	1	0	0	1	1	2	2R	10027405	10030071	CG10112 CG30197
1239	1	1	0	0	0	0	1	1	1	4	2R	10041434	10110477	CG10117 CG30076 CG10119 CG12869
1240	1	2	0	0	0	0	1	2	3	3	2R	10110478	10119215	CG10122 CG30077 CG10128
1241	1	1	0	0	0	1	1	0	3	3	2R	10119499	10121822	CG12868 CG33469 CG33468
1242	1	2	0	0	1	0	0	2	1	1	2R	10122280	10132908	CG12864
1243	1	2	0	0	0	0	1	2	1	1	2R	10133590	10134547	CG10130
1244	1	3	0	0	0	2	1	1	1	1	2R	10134658	10136175	CG12863
1245	3	3	0	0	2	0	1	3	8	10	2R	10255229	10284285	CG12858 CG10146 CG18372 CG10149 CG30476 CG10151 CG12859 CG10153 CG12857 CG10155
1246	1	2	0	0	0	1	1	1	8	9	2R	10285333	10367513	CG10159 CG10197 CG12856 CG10200 CG10202 CG10205 CG10207 CG10209 CG10212
1247	2	1	0	0	0	0	2	1	2	4	2R	10367828	10373469	CG10215 CG12797 CG12855 CG33506
1248	2	2	0	0	0	0	2	2	2	2	2R	10373704	10385931	CG33505 CG10228
1249	6	1	0	0	1	0	5	1	3	3	2R	10386555	10392517	CG10240 CG10241 CG10242
1250	1	3	0	0	0	1	1	2	1	1	2R	10392651	10394618	CG10243
1251	6	1	0	0	1	0	5	1	2	2	2R	10396983	10401814	CG10245 CG10247
1252	2	1	0	0	0	0	2	1	6	8	2R	10402031	10477809	CG10248 CG17453 CG10249 CG10253 CG10255 CG10257 CG10261 CG30475
1253	1	2	0	0	0	0	1	2	1	1	2R	10479051	10495447	CG12424
1254	2	2	0	0	0	0	2	2	1	2	2R	10496158	10507086	CG7761 CG7639
1255	1	2	0	0	0	0	1	2	3	3	2R	10507189	10659646	CG10265 CG7449 CG11798
1256	1	2	0	0	0	1	1	1	7	8	2R	10662740	10732476	CG7544 CG18285 CG8090 CG11807 CG8092 CG8093 CG11808 CG12954
1257	5	2	1	0	0	0	4	2	1	3	2R	10733244	10756442	CG8079 CG8094 CG33466
1258	2	1	0	0	0	0	2	1	7	7	2R	10763648	10837032	CG8095 CG30079 CG30078 CG8102 CG8152 CG8153 CG8155
1259	1	3	0	0	0	0	1	3	2	2	2R	10837337	10854183	CG8156 CG16801
1260	3	1	0	0	0	0	3	1	1	1	2R	10865017	10883050	CG8166
1261	1	2	0	0	0	0	1	2	13	15	2R	10883051	11047101	CG8169 CG8171 CG8174 CG18625 CG12958 CG12959 CG8179 CG30470 CG8180 CG12964 CG30469 CG30468 CG30464 CG8182 CG8183
1262	1	1	0	0	0	1	1	0	1	1	2R	11050058	11052513	CG30471
1263	1	2	0	0	1	0	0	2	4	6	2R	11053076	11077309	CG30467 CG8187 CG8186 CG8190 CG8192 CG12963
1264	1	1	0	0	0	0	1	1	1	1	2R	11077557	11080649	CG8195
1265	8	1	4	0	1	0	3	1	4	5	2R	11087999	11203848	CG8204 CG8205 CG8207 CG33139 CG8214
1266	3	4	1	0	1	2	1	2	2	2	2R	11242261	11331672	CG30089 CG30084
1267	2	2	0	0	1	0	1	2	2	2	2R	11370824	11376883	CG12970 CG8256
1268	1	5	0	0	0	0	1	5	1	1	2R	11379167	11384008	CG30085
1269	3	1	1	0	0	0	2	1	2	3	2R	11386282	11446792	CG33464 CG8355 CG8291
1270	1	2	0	0	0	1	1	1	1	1	2R	11447027	11449606	CG8293
1271	2	2	0	0	1	0	1	2	1	2	2R	11449751	11454936	CG8297 CG8295
1272	5	2	0	0	0	0	5	2	1	1	2R	11455564	11456346	CG8299
1273	2	2	0	0	1	0	1	2	6	7	2R	11458975	11507214	CG30093 CG8302 CG18255 CG8366 CG15699 CG8314 CG8315
1274	2	2	0	0	0	0	2	2	1	2	2R	11515986	11522518	CG8370 CG8386
1275	2	4	0	0	0	0	2	4	1	3	2R	11523235	11529643	CG8389 CG8388 CG8392
1276	4	1	0	0	0	0	4	1	6	7	2R	11532602	11617466	CG8399 CG8400 CG8401 CG8403 CG8405 CG18250 CG8414
1277	1	2	0	0	0	0	1	2	2	2	2R	11617780	11624878	CG8416 CG8418
1278	3	9	0	0	0	2	3	7	5	5	2R	11625348	11653101	CG8421 CG8424 CG8425 CG30095 CG8428
1279	4	1	1	0	0	0	3	1	2	2	2R	11653215	11657801	CG8430 CG30094
1280	3	1	0	0	0	1	3	0	1	2	2R	11658013	11662174	CG8431 CG8433
1281	1	1	0	0	1	0	0	1	3	4	2R	11662175	11691516	CG10731 CG8434 CG8435 CG18243
1282	1	3	0	0	0	0	1	3	2	2	2R	11693667	11700864	CG8440 CG8441
1283	2	1	0	0	0	0	2	1	1	2	2R	11701448	11711165	CG8443 CG8445
1284	1	1	0	1	0	0	1	0	1	1	2R	11711254	11714242	CG8446
1285	1	2	1	0	0	0	0	2	2	2	2R	11714286	11725262	CG18247 CG8448
1286	1	1	0	0	0	0	1	1	2	4	2R	11737044	11748949	CG7798 CG15706 CG3666 CG15701
1287	1	3	0	0	0	0	1	3	3	3	2R	11749221	11755580	CG7786 CG3687 CG15707
1288	1	3	0	0	0	0	1	3	4	4	2R	11755798	11779479	CG15708 CG7779 CG15709 CG7773
1289	2	2	0	0	0	0	2	2	2	2	2R	11779538	11786841	CG3730 CG7765
1290	2	1	0	1	0	0	2	0	2	2	2R	11787175	11793221	CG33017 CG7760
1291	1	1	1	1	0	0	0	0	3	4	2R	11794877	11803096	CG15704 CG15705 CG7755 CG30324
1292	1	2	1	0	0	1	0	1	4	4	2R	11803134	11808989	CG30099 CG3767 CG30100 CG7747
1293	3	1	0	0	1	0	2	1	4	4	2R	11809265	11835580	CG3615 CG15924 CG3896 CG8060
1294	2	1	0	0	0	0	2	1	4	5	2R	11836412	11859042	CG30096 CG4282 CG8048 CG4311 CG7997
1295	1	2	0	1	0	1	1	0	1	2	2R	11859240	11862361	CG6251 CG7989
1296	1	1	0	0	1	0	0	1	2	4	2R	11874593	11945626	CG6262 CG33960 CG7969 CG7964
1297	1	1	0	0	0	0	1	1	3	3	2R	11948711	11962377	CG7848 CG4409 CG15925
1298	1	3	0	0	0	0	1	3	8	9	2R	11999704	12086100	CG15712 CG4439 CG7813 CG4700 CG4750 CG4905 CG8380 CG4945 CG8332
1299	4	2	0	0	0	0	4	2	3	3	2R	12086962	12100311	CG4927 CG8317 CG5072
1300	1	3	0	0	0	1	1	2	1	1	2R	12101908	12104031	CG8311
1301	2	1	1	1	0	0	1	0	2	3	2R	12104382	12119097	CG8306 CG8303 CG5089
1302	1	1	1	0	0	0	0	1	10	12	2R	12122533	12280845	CG5065 CG8250 CG18471 CG8221 CG8178 CG8098 CG5197 CG30463 CG5210 CG15617 CG8566 CG5267
1303	2	2	0	0	0	0	2	2	4	4	2R	12287779	12298038	CG8905 CG5409 CG33544 CG15920
1304	4	2	0	0	0	0	4	2	3	3	2R	12298554	12309852	CG5522 CG15919 CG15615
1305	4	1	0	0	1	0	3	1	6	8	2R	12383056	12416441	CG6341 CG6426 CG6421 CG6429 CG6435 CG8910 CG6472 CG6518
1306	1	1	0	0	0	1	1	0	4	4	2R	12439817	12470018	CG6622 CG15614 CG33456 CG33455
1307	1	2	0	0	1	1	0	1	6	7	2R	12470327	12516789	CG6657 CG6665 CG9010 CG6702 CG9002 CG9001 CG9000
1308	2	1	0	0	1	1	1	0	1	2	2R	12516877	12519962	CG6796 CG8980
1309	1	1	0	0	1	0	0	1	1	1	2R	12520316	12522467	CG6805
1310	2	6	0	2	0	1	2	3	4	5	2R	12522769	12559523	CG15609 CG8963 CG6829 CG9635 CG30459
1311	4	1	0	0	0	0	4	1	2	2	2R	12559819	12563370	CG9640 CG9642
1312	2	2	0	0	0	2	2	0	2	3	2R	12563738	12574168	CG9646 CG6953 CG8961
1313	2	1	0	1	2	0	0	0	2	3	2R	12574726	12590981	CG8950 CG6967 CG30460
1314	1	1	1	0	0	0	0	1	1	1	2R	12603297	12606519	CG8946
1315	1	1	0	0	0	0	1	1	14	14	2R	12606873	12922288	CG6984 CG8938 CG30456 CG15611 CG15605 CG15918 CG11395 CG17290 CG30458 CG30457 CG10953 CG33197 CG10939 CG6568
1316	2	1	0	0	0	0	2	1	3	3	2R	12923258	12934462	CG30101 CG10938 CG6556
1317	2	1	0	0	0	0	2	1	2	3	2R	12935296	12944174	CG4798 CG6550 CG4802
1318	2	3	0	0	0	0	2	3	5	7	2R	12944212	12984039	CG6546 CG18468 CG6542 CG18467 CG10751 CG14478 CG6522
1319	3	1	0	0	0	0	3	1	7	8	2R	12984495	13028722	CG4816 CG6520 CG4827 CG30104 CG30103 CG18431 CG4844 CG4847
1320	1	1	0	0	0	0	1	1	3	4	2R	13029113	13050512	CG4853 CG11419 CG4866 CG33130
1321	2	3	0	0	0	0	2	3	3	3	2R	13051076	13059221	CG4878 CG18432 CG18631
1322	1	2	0	0	0	2	1	0	1	1	2R	13059755	13061258	CG4886
1323	3	1	0	0	3	0	0	1	1	2	2R	13061259	13070517	CG6510 CG4903
1324	1	1	0	0	0	0	1	1	4	5	2R	13071770	13087617	CG15844 CG14480 CG6501 CG4909 CG14482
1325	2	5	0	0	0	2	2	3	1	2	2R	13087745	13096369	CG4921 CG6493
1326	3	1	0	0	1	0	2	1	3	3	2R	13096775	13105745	CG6484 CG14483 CG6477
1327	1	1	0	0	0	0	1	1	4	7	2R	13105829	13169159	CG4924 CG30105 CG4943 CG11423 CG10936 CG10683 CG30106
1328	1	1	0	0	0	0	1	1	1	1	2R	13180541	13184107	CG4954
1329	1	2	0	0	0	1	1	1	2	2	2R	13185045	13187498	CG30109 CG6459
1330	2	2	0	0	1	1	1	1	3	3	2R	13187700	13205415	CG6446 CG14481 CG4966
1331	2	2	0	0	1	0	1	2	1	2	2R	13205416	13213224	CG14485 CG17818
1332	4	1	0	0	1	1	3	0	3	3	2R	13218200	13241663	CG6424 CG10933 CG6410
1333	1	2	0	0	1	0	0	2	2	2	2R	13241835	13247852	CG4975 CG4984
1334	3	2	0	1	0	0	3	1	1	2	2R	13248118	13252127	CG4989 CG6406
1335	5	2	0	0	0	2	5	0	1	1	2R	13252715	13254520	CG6401
1336	1	2	0	0	1	0	0	2	1	1	2R	13254756	13258838	CG4996
1337	1	2	0	0	0	0	1	2	1	1	2R	13259525	13260724	CG14487
1338	7	1	1	0	1	0	5	1	8	10	2R	13263881	13296775	CG10931 CG5002 CG5005 CG5009 CG6370 CG14488 CG18635 CG6362 CG33981 CG6355
1339	1	1	0	0	0	1	1	0	6	9	2R	13301000	13380755	CG5032 CG5788 CG5033 CG5036 CG5058 CG11430 CG14489 CG14490 CG5785
1340	1	1	0	0	1	0	0	1	1	1	2R	13381882	13386873	CG5784
1341	1	1	0	1	0	0	1	0	1	5	2R	13388810	13440455	CG5076 CG30325 CG5779 CG14492 CG14491
1342	1	2	1	0	0	1	0	1	17	18	2R	13470258	13640695	CG10930 CG33996 CG5084 CG10910 CG5773 CG5770 CG5767 CG34005 CG14495 CG5765 CG10911 CG10912 CG14496 CG14497 CG5757 CG5098 CG5756 CG5753
1343	3	4	0	0	1	1	2	3	1	1	2R	13641168	13643082	CG10913
1344	1	1	0	0	0	0	1	1	4	4	2R	13643363	13661101	CG12767 CG5748 CG5109 CG5119
1345	1	1	0	0	0	0	1	1	1	1	2R	13662160	13662857	CG17680
1346	1	1	0	0	0	0	1	1	1	1	2R	13663309	13666250	CG5742
1347	1	1	0	0	0	0	1	1	1	1	2R	13666567	13668709	CG5124
1348	1	1	0	0	0	0	1	1	2	2	2R	13669184	13675173	CG5738 CG10914
1349	1	2	0	0	0	0	1	2	2	2	2R	13675580	13681992	CG10915 CG5733
1350	2	1	0	0	0	0	2	1	1	1	2R	13682140	13683243	CG5134
1351	1	4	0	0	0	2	1	2	1	1	2R	13683271	13687470	CG5729
1352	3	1	0	0	0	1	3	0	2	2	2R	13688534	13695032	CG10916 CG5726
1353	1	1	0	0	1	1	0	0	1	2	2R	13695359	13698976	CG5140 CG5721
1354	1	1	0	0	1	0	0	1	24	26	2R	13699649	13955344	CG33958 CG10917 CG5581 CG33198 CG5580 CG14502 CG18536 CG18537 CG18538 CG18539 CG15066 CG18108 CG15067 CG18106 CG16836 CG5154 CG17522 CG17530 CG17531 CG17533 CG17534 CG5576 CG5170 CG5174 CG12263 CG30118
1355	2	1	0	1	0	0	2	0	1	1	2R	13955820	13960395	CG5186
1356	3	2	3	0	0	0	0	2	5	7	2R	13961433	14019707	CG5189 CG5519 CG30120 CG5190 CG17669 CG30116 CG5224
1357	2	2	0	0	0	0	2	2	4	4	2R	14029439	14061871	CG5226 CG10924 CG17725 CG15069
1358	5	1	1	0	2	0	2	1	1	1	2R	14068975	14076498	CG30115
1359	1	1	0	0	0	0	1	1	1	2	2R	14127945	14129879	CG10927 CG5497
1360	1	1	0	0	0	1	1	0	2	5	2R	14129944	14139911	CG5323 CG5327 CG5493 CG5489 CG5335
1361	1	3	0	0	1	1	0	2	1	1	2R	14140130	14142607	CG5341
1362	6	6	0	0	1	3	5	3	1	1	2R	14147192	14154131	CG30122
1363	1	1	0	0	0	0	1	1	2	2	2R	14155886	14175067	CG5473 CG5469
1364	2	1	0	0	0	0	2	1	5	6	2R	14179825	14220675	CG33136 CG15085 CG15086 CG15072 CG15071 CG18604
1365	1	1	0	1	0	0	1	0	1	2	2R	14220845	14225723	CG15073 CG15087
1366	1	1	1	0	0	0	0	1	10	14	2R	14232992	14317262	CG33147 CG15088 CG33998 CG18609 CG17821 CG15077 CG34020 CG15092 CG33148 CG33146 CG15093 CG15080 CG15094 CG15095
1367	1	1	0	0	0	1	1	0	1	1	2R	14323199	14329872	CG15096
1368	1	1	0	1	1	0	0	0	5	6	2R	14334348	14360726	CG15081 CG15097 CG15082 CG15098 CG15083 CG15099
1369	1	1	1	0	0	0	0	1	1	1	2R	14361721	14365542	CG15100
1370	1	3	0	0	0	1	1	2	16	17	2R	14365724	14636821	CG15084 CG18190 CG15101 CG15102 CG15106 CG12763 CG10794 CG30329 CG12758 CG18608 CG15104 CG18605 CG15105 CG15113 CG30126 CG15109 CG16720
1371	9	4	2	0	3	0	4	4	2	3	2R	14644457	14655901	CG15110 CG15118 CG15111
1372	7	2	0	1	0	0	7	1	2	2	2R	14670059	14693091	CG15112 CG10737
1373	3	3	1	0	0	0	2	3	9	9	2R	14693617	14807066	CG7097 CG7137 CG11949 CG7225 CG7229 CG7230 CG11906 CG11001 CG15119
1374	4	2	1	0	0	0	3	2	1	1	2R	14807431	14818887	CG7417
1375	2	2	0	0	0	0	2	2	1	1	2R	14822303	14825555	CG9834
1376	3	2	0	0	1	0	2	2	9	10	2R	14827005	14904187	CG9811 CG30127 CG34045 CG9975 CG11961 CG10051 CG9416 CG10062 CG10073 CG10081
1377	1	1	0	0	0	0	1	1	1	1	2R	14905044	14906706	CG11257
1378	1	2	0	0	0	2	1	0	2	2	2R	14906719	14911623	CG17246 CG10460
1379	1	4	0	0	1	1	0	3	1	1	2R	14914380	14939812	CG9325
1380	1	2	0	0	0	0	1	2	3	3	2R	14939936	14956762	CG7563 CG10023 CG7626
1381	3	2	0	0	0	1	3	1	2	3	2R	14971037	15001698	CG8201 CG7753 CG11242
1382	2	1	0	0	1	0	1	1	3	3	2R	15001907	15011730	CG11237 CG8432 CG11228
1383	2	1	0	1	0	0	2	0	2	3	2R	15012617	15019131	CG15120 CG16926 CG11007
1384	1	1	1	0	0	0	0	1	28	29	2R	15023030	15727482	CG15121 CG15122 CG15904 CG9218 CG16716 CG18367 CG15124 CG15905 CG15125 CG9854 CG11025 CG15127 CG15128 CG15126 CG11797 CG30129 CG30128 CG11218 CG8462 CG8517 CG12501 CG13873 CG13874 CG8595 CG13872 CG8654 CG8896 CG11041 CG16894
1385	1	1	0	0	0	0	1	1	1	1	2R	15746694	15749796	CG11044
1386	1	1	0	0	0	0	1	1	2	4	2R	15751098	15760262	CG11099 CG13869 CG11048 CG11208
1387	2	1	0	0	0	0	2	1	3	3	2R	15762993	15776599	CG9864 CG9204 CG11055
1388	1	2	0	0	0	0	1	2	3	3	2R	15776617	15779757	CG9193 CG9183 CG8900
1389	1	3	0	0	0	1	1	2	2	2	2R	15779795	15789388	CG8908 CG10444
1390	2	3	0	0	0	1	2	2	1	1	2R	15789549	15790919	CG11788
1391	2	3	0	0	1	1	1	2	2	3	2R	15790920	15801942	CG9143 CG9090 CG16868
1392	2	1	0	0	1	0	1	1	2	3	2R	15803218	15823502	CG9036 CG8914 CG11200
1393	1	4	0	0	0	0	1	4	2	2	2R	15823575	15833833	CG13868 CG13871
1394	2	5	0	1	0	2	2	2	1	2	2R	15834070	15841669	CG8920 CG13867
1395	4	1	0	0	3	1	1	0	9	9	2R	15842130	16041689	CG8929 CG16739 CG13870 CG11192 CG33041 CG30143 CG13421 CG13426 CG13422
1396	1	1	0	0	1	1	0	0	3	3	2R	16043367	16050218	CG30151 CG30154 CG18067
1397	1	1	0	0	1	0	0	1	5	6	2R	16051441	16066949	CG13423 CG13427 CG30148 CG18066 CG13430 CG18065
1398	2	2	0	0	0	0	2	2	1	2	2R	16071722	16077190	CG13424 CG13431
1399	1	1	0	0	0	1	1	0	2	2	2R	16077898	16102070	CG13432 CG13434
1400	1	1	0	0	1	0	0	1	5	8	2R	16102368	16155549	CG13425 CG30147 CG9945 CG11180 CG16742 CG11175 CG30149 CG13436
1401	1	1	0	0	0	0	1	1	9	10	2R	16155834	16182148	CG9954 CG11110 CG33785 CG33786 CG11132 CG16799 CG11159 CG11136 CG13437 CG9025
1402	1	1	0	0	0	0	1	1	1	1	2R	16183213	16185353	CG8994
1403	2	1	0	0	0	0	2	1	19	21	2R	16186066	16481574	CG30152 CG13441 CG13438 CG13439 CG13442 CG13443 CG15226 CG15225 CG11312 CG9985 CG17999 CG9993 CG15227 CG33990 CG30295 CG9236 CG10036 CG9235 CG10052 CG33152 CG15649
1404	1	1	0	0	0	0	1	1	2	2	2R	16484638	16485819	CG9344 CG15650
1405	7	1	0	0	2	0	5	1	1	1	2R	16486926	16491520	CG9313
1406	1	1	0	0	0	0	1	1	4	5	2R	16491521	16517155	CG15651 CG3216 CG9327 CG10543 CG30291
1407	1	2	0	1	0	0	1	1	3	4	2R	16517348	16532492	CG33133 CG9346 CG3295 CG30296
1408	2	1	1	1	0	0	1	0	2	2	2R	16532662	16564741	CG9350 CG3722
1409	1	1	1	0	0	1	0	0	4	5	2R	16565373	16572545	CG10540 CG15653 CG9353 CG9357 CG30293
1410	2	1	1	0	1	0	0	1	5	5	2R	16572962	16598584	CG3986 CG10531 CG10527 CG9364 CG4030
1411	1	1	0	0	0	0	1	1	5	8	2R	16600082	16650779	CG15654 CG15655 CG9398 CG9394 CG4050 CG9401 CG30388 CG9406
1412	1	2	0	0	0	0	1	2	6	7	2R	16651127	16678177	CG9415 CG9418 CG15657 CG30389 CG4266 CG9437 CG4279
1413	1	7	0	4	0	1	1	2	2	3	2R	16678585	16690198	CG9433 CG9441 CG4286
1414	1	2	0	0	0	1	1	1	9	10	2R	16691014	16793251	CG9450 CG15658 CG9480 CG4302 CG15661 CG18375 CG30391 CG15660 CG33949 CG10069
1415	1	6	0	2	0	2	1	2	1	1	2R	16799896	16801058	CG30390
1416	2	4	0	0	1	2	1	2	1	1	2R	16801976	16803169	CG9752
1417	3	1	1	1	1	0	1	0	1	1	2R	16817943	16819930	CG9754
1418	1	1	1	0	0	0	0	1	1	3	2R	16819931	16827151	CG30387 CG30386 CG9485
1419	2	2	0	0	0	0	2	2	1	1	2R	16827620	16831133	CG30394
1420	2	1	0	1	0	0	2	0	6	6	2R	16849567	16893797	CG15666 CG9822 CG17974 CG15671 CG10795 CG9841
1421	1	1	1	0	0	0	0	1	2	2	2R	16893936	16900022	CG9707 CG9709
1422	1	1	0	0	0	0	1	1	5	6	2R	16901199	17026688	CG10497 CG15667 CG9847 CG10496 CG15669 CG10494
1423	2	4	0	0	0	0	2	4	6	6	2R	17055151	17124449	CG10079 CG10440 CG30222 CG10433 CG15673 CG18870
1424	3	2	1	0	1	1	1	1	2	2	2R	17124638	17132024	CG9858 CG9856
1425	1	1	0	0	0	0	1	1	6	8	2R	17132617	17169826	CG10080 CG15674 CG10321 CG10082 CG30284 CG10320 CG9862 CG15678
1426	2	2	0	0	0	2	2	0	2	2	2R	17175109	17179175	CG9865 CG10318
1427	1	1	0	0	1	1	0	0	2	3	2R	17183903	17195222	CG30263 CG10306 CG9874
1428	1	2	0	0	1	0	0	2	2	3	2R	17195485	17198691	CG30285 CG10307 CG9878
1429	3	1	0	0	1	1	2	0	1	1	2R	17199172	17200311	CG30290
1430	1	1	0	0	1	1	0	0	22	24	2R	17200312	17483787	CG17922 CG17921 CG30403 CG17950 CG30404 CG30398 CG17952 CG7975 CG4402 CG18735 CG4386 CG13492 CG34040 CG4363 CG4377 CG9294 CG13493 CG3245 CG4054 CG13487 CG13488 CG13489 CG13490 CG9304
1431	1	1	0	0	1	0	0	1	8	9	2R	17484244	17568242	CG13491 CG13495 CG30401 CG33227 CG34004 CG13499 CG9308 CG13500 CG13501
1432	2	1	0	0	0	0	2	1	1	1	2R	17577305	17578868	CG11475
1433	2	2	0	0	0	0	2	2	2	4	2R	17578869	17582919	CG6393 CG30327 CG11474 CG2921
1434	1	1	0	0	0	0	1	1	2	3	2R	17583624	17595213	CG6437 CG6562 CG13502
1435	1	2	0	0	0	0	1	2	1	1	2R	17599066	17607308	CG11073
1436	2	2	0	0	0	0	2	2	3	6	2R	17610770	17635079	CG6613 CG13503 CG30280 CG30281 CG5303 CG11061
1437	1	2	0	0	0	0	1	2	1	1	2R	17635390	17637770	CG6698
1438	2	2	0	0	0	2	2	0	1	4	2R	17644573	17682320	CG6741 CG11269 CG6727 CG3045
[truncated: 1,250 more rows]

## Sheet: GO tree & order
(dwil:894,(((dmel:1,(dere:7,dyak:22)A10:8)A11:217,dana:248)A15:154,dpse:359)A14:183,((dmoj:114,dvir:88)A12:48,dgri:201)A13:514)A16;
[truncated: 2,694 more rows]

[truncated: 2 more sheets: OLC breaks & genes, OLC tree & order]
