# Supplementary material for: Fragile regions and not functional constraints predominate in shaping gene organization in the genus Drosophila
Source: HighWire-hosted journal article supplement (doi:10.1101/gr.103713.109), 2010-07-02
Supplement: Supp_Dataset_S3.zip [file Dataset S3.xls]

## Sheet: missed genes under GOO
Gene	IGA	HCB#	Explnation why a gene is missed
CG13376	X:0005		outside of SB and not annotated in dmoj
CG3114	X:0006		outside of SB and not annotated in dwil
CG13375	X:0007		outside of SB and not annotated in dwil
CG13373	X:0020		not annotated in Drosophila subgenus
CG18275	X:0021		not annotated in Drosophila subgenus
CG32817	X:0022		not annotated in Drosophila subgenus
CG18166	X:0023		not annotated in Drosophila subgenus
CG13369	X:0036		outside of SB and not annotated in dwil, dmoj, dgri
CG13364	X:0036		outside of SB and not annotated in dwil, dmoj, dgri
CG16983	X:0043		not annotated in Drosophila subgenus
CG5273	X:0047		outside of SB and not annotated in dwil
CG7434	X:0048		outside of SB and not annotated in dwil
CG13359	X:0053		not annotated in Drosophila subgenus
CG13358	X:0054		not annotated in Drosophila subgenus
CG14635	X:0057	25	not annotated in Drosophila subgenus
CG3713	X:0058	25	not annotated in Drosophila subgenus
CG14634	X:0059	25	not annotated in Drosophila subgenus
CG11664	X:0060	25	not annotated in Drosophila subgenus
CG11663	X:0063	25	not annotated in Drosophila subgenus
CG18823	X:0072	28	not annotated in Drosophila subgenus
CG11639	X:0073	28	not annotated in Drosophila subgenus
CG14631	X:0074	28	not annotated in Drosophila subgenus
CG32814	X:0075	28	not annotated in Drosophila subgenus
CG3658	X:0076	29	more complex explanation
CG14628	X:0081	31	not annotated in Drosophila subgenus
CG11398	X:0093		not annotated in Drosophila subgenus
CG3638	X:0094		not annotated in Drosophila subgenus
CG32812	X:0097		outside of SB and not annotated in dmoj
CG32811	X:0099		not annotated in Drosophila subgenus
CG18091	X:0100		not annotated in Drosophila subgenus
CG14774	X:0111		not annotated in Drosophila subgenus
CG14773	X:0115	48	not annotated in Drosophila subgenus
CG32810	X:0134		outside of SB and not annotated in dyak
CG11509	X:0136	55	not annotated in Drosophila subgenus
CG14798	X:0140	57	not annotated in Drosophila subgenus
CG14809	X:0143		not annotated in Drosophila subgenus
CG12598	X:0144		outside of SB and not assembled in dvir
CG32806	X:0145		not annotated in Drosophila subgenus
CG14810	X:0146		not annotated in Drosophila subgenus
CG14811	X:0147		not annotated in Drosophila subgenus
CG14799	X:0148		not annotated in Drosophila subgenus
CG14816	X:0154		outside of SB and not annotated in dwil
CG32802	X:0169		not annotated in Drosophila subgenus
CG14054	X:0180		not annotated in Drosophila subgenus
CG4199	X:0181	74	more complex explanation
CG4194	X:0181	74	more complex explanation
CG32804	X:0181	74	not annotated in Drosophila subgenus
CG3895	X:0185		not annotated in Drosophila subgenus
CG3621	X:0192		not annotated in Drosophila subgenus
CG3466	X:0194		not annotated in Drosophila subgenus
CG10755	X:0195		not annotated in Drosophila subgenus
CG17776	X:0197		outside of SB and not annotated in dmoj
CG17777	X:0198		outside of SB and not annotated in dmoj
CG14053	X:0200	82	not annotated in Drosophila subgenus
CG34052	X:0219	88	not annotated in Drosophila subgenus
CG2854	X:0221		not annotated in Drosophila subgenus
CG33218	X:0222		not annotated in Drosophila subgenus
CG14049	X:0223		not annotated in Drosophila subgenus
CG32797	X:0230		not annotated in Drosophila subgenus
CG7952	X:0231		outside of SB and not annotated in dgri
CG7925	X:0232		outside of SB and not annotated in dgri
CG8590	X:0241		outside of SB and not annotated in dgri
CG13762	X:0246		not annotated in Drosophila subgenus
CG2706	X:0260		outside of SB and not annotated in dpse
CG2711	X:0263		outside of SB and not annotated in dwil
CG14417	X:0271	106	more complex explanation
CG32794	X:0274	106	not annotated in Drosophila subgenus
CG14265	X:0294	111	not annotated in Drosophila subgenus
CG14266	X:0294	111	not annotated in Drosophila subgenus
CG10788	X:0294	111	not annotated in Drosophila subgenus
CG10781	X:0294	111	not annotated in Drosophila subgenus
CG10789	X:0294	111	not annotated in Drosophila subgenus
CG10801	X:0299		not annotated in Drosophila subgenus
CG16781	X:0300		outside of SB and not annotated in dmoj
CG13021	X:0307	116	not annotated in Drosophila subgenus
CG12462	X:0314		not annotated in Drosophila subgenus
CG2947	X:0317		not annotated in Drosophila subgenus
CG32788	X:0318		outside of SB and not annotated in dere, dyak, dana, dpse, dwil, dgri
CG33221	X:0319		not annotated in Drosophila subgenus
CG32789	X:0320		not annotated in Drosophila subgenus
CG32786	X:0333		not annotated in Drosophila subgenus
CG32783	X:0334		outside of SB and not annotated in dere, dyak, dana, dpse, dmoj, dgri
CG6450	X:0336		more complex explanation
CG6414	X:0338		outside of SB and not assembled in dana
CG15375	X:0344		not annotated in Drosophila subgenus
CG15576	X:0357	132	not annotated in Drosophila subgenus
CG12691	X:0358	132	more complex explanation
CG15572	X:0359	132	more complex explanation
CG15577	X:0360	132	more complex explanation
CG15578	X:0361	132	not annotated in Drosophila subgenus
CG12692	X:0362	132	not annotated in Drosophila subgenus
CG15579	X:0363	132	more complex explanation
CG12688	X:0369	134	not annotated in Drosophila subgenus
CG32773	X:0370	134	not annotated in Drosophila subgenus
CG12685	X:0372	134	not annotated in Drosophila subgenus
CG12684	X:0382	139	not annotated in Drosophila subgenus
CG12184	X:0384		not annotated in Drosophila subgenus
CG12179	X:0385		not annotated in Drosophila subgenus
CG6998	X:0395		outside of SB and not annotated in dwil
CG12683	X:0399		not annotated in Drosophila subgenus
CG15472	X:0400		not annotated in Drosophila subgenus
CG2871	X:0402	145	not annotated in Drosophila subgenus
CG6978	X:0404		outside of SB and not annotated in dwil, dmoj, dgri
CG2861	X:0405		not annotated in Drosophila subgenus
CG12682	X:0406		outside of SB and not annotated in dpse, dgri
CG12681	X:0407		not annotated in Drosophila subgenus
CG12680	X:0418	150	more complex explanation
CG12732	X:0441	157	not annotated in Drosophila subgenus
CG3239	X:0448		outside of SB and not annotated in dgri
CG15780	X:0454		outside of SB and not annotated in dgri
CG17763	X:0455		not annotated in Drosophila subgenus
CG32763	X:0457	165	more complex explanation
CG15767	X:0487		not annotated in Drosophila subgenus
CG12239	X:0488		outside of SB and not annotated in dgri
CG4052	X:0489		not annotated in Drosophila subgenus
CG18341	X:0490		outside of SB and not annotated in dwil, dgri
CG15766	X:0491		outside of SB and not annotated in dgri
CG15765	X:0492		outside of SB and not annotated in dgri
CG11462	X:0492		not annotated in Drosophila subgenus
CG12729	X:0493		not annotated in Drosophila subgenus
CG15764	X:0494		not annotated in Drosophila subgenus
CG12728	X:0503		not annotated in Drosophila subgenus
CG4336	X:0513		outside of SB and not annotated in dgri
CG32745	X:0536		not annotated in Drosophila subgenus
CG11700	X:0537		not annotated in Drosophila subgenus
CG33664	X:0553		not annotated in Drosophila subgenus
CG33669	X:0554		not annotated in Drosophila subgenus
CG33668	X:0555		not annotated in Drosophila subgenus
CG33667	X:0557	197	not annotated in Drosophila subgenus
CG33666	X:0558	197	not annotated in Drosophila subgenus
CG33665	X:0559	197	not annotated in Drosophila subgenus
CG3918	X:0561		outside of SB and not annotated in dmoj
CG3342	X:0561		outside of SB and not annotated in dmoj
CG14443	X:0570	200	not annotated in Drosophila subgenus
CG32741	X:0582	204	not annotated in Drosophila subgenus
CG14439	X:0586		outside of SB and not annotated in dgri
CG14438	X:0587		outside of SB and not annotated in dgri
CG4575	X:0602		not annotated in Drosophila subgenus
CG32733	X:0603		not annotated in Drosophila subgenus
CG4593	X:0614		outside of SB and not assembled in dvir
CG8300	X:0622		outside of SB and not annotated in dwil
CG4626	X:0622		outside of SB and not annotated in dwil
CG1958	X:0624	223	more complex explanation
CG18155	X:0631		outside of SB and not assembled in dwil
CG15034	X:0633	227	not annotated in Drosophila subgenus
CG32727	X:0637		not annotated in Drosophila subgenus
CG15036	X:0639		not annotated in Drosophila subgenus
CG32726	X:0640		not annotated in Drosophila subgenus
CG11368	X:0641		outside of SB and not annotated in dana, dpse, dmoj, dgri
CG32719	X:0642		not annotated in Drosophila subgenus
CG32720	X:0643		outside of SB and not annotated in dwil, dmoj
CG12689	X:0645		not annotated in Drosophila subgenus
CG32718	X:0656		not annotated in Drosophila subgenus
CG15325	X:0664		outside of SB and not annotated in dwil, dmoj
CG10932	X:0665		outside of SB and not annotated in dmoj
CG11386	X:0669	244	not annotated in Drosophila subgenus
CG33222	X:0670	244	not annotated in Drosophila subgenus
CG15330	X:0685	250	not annotated in Drosophila subgenus
CG2212	X:0686	250	more complex explanation
CG1543	X:0687		outside of SB and not annotated in dwil, dvir
CG15333	X:0687		not annotated in Drosophila subgenus
CG2233	X:0688		outside of SB and not annotated in dvir
CG10759	X:0711		not annotated in Drosophila subgenus
CG32715	X:0717	265	not annotated in Drosophila subgenus
CG15344	X:0722	266	not annotated in Drosophila subgenus
CG15345	X:0724		not annotated in Drosophila subgenus
CG32711	X:0727		not annotated in Drosophila subgenus
CG15347	X:0735		outside of SB and not annotated in dwil
CG33223	X:0737	273	not annotated in Drosophila subgenus
CG32714	X:0738	273	not annotated in Drosophila subgenus
CG1634	X:0740		outside of SB and not assembled in dpse
CG11219	X:0740		outside of SB and not assembled in dpse
CG12113	X:0741		outside of SB and not assembled in dpse
CG12112	X:0742		not annotated in Drosophila subgenus
CG2056	X:0745		outside of SB and not annotated in dgri
CG12081	X:0747	276	more complex explanation
CG12659	X:0747	276	more complex explanation
CG1795	X:0752		outside of SB and not annotated in dana, dpse
CG2004	X:0754	279	more complex explanation
CG32710	X:0758	281	not annotated in Drosophila subgenus
CG3898	X:0766	282	not annotated in Drosophila subgenus
CG12661	X:0767	282	more complex explanation
CG32709	X:0768	282	not annotated in Drosophila subgenus
CG15364	X:0768	282	not annotated in Drosophila subgenus
CG15366	X:0773	283	not annotated in Drosophila subgenus
CG32708	X:0777		not annotated in Drosophila subgenus
CG32706	X:0778		not annotated in Drosophila subgenus
CG6999	X:0779		not annotated in Drosophila subgenus
CG8989	X:0789		not annotated in Drosophila subgenus
CG11042	X:0789		not annotated in Drosophila subgenus
CG17438	X:0814	302	not annotated in Drosophila subgenus
CG17440	X:0816		not annotated in Drosophila subgenus
CG12667	X:0821	305	not annotated in Drosophila subgenus
CG12149	X:0823		outside of SB and not assembled in dvir
CG12650	X:0828	306	not annotated in Drosophila subgenus
CG15316	X:0829	306	not annotated in Drosophila subgenus
CG34028	X:0830	306	not annotated in Drosophila subgenus
CG34026	X:0830	306	not annotated in Drosophila subgenus
CG15321	X:0844		not annotated in Drosophila subgenus
CG1468	X:0854	318	not annotated in Drosophila subgenus
CG2990	X:0867		more complex explanation
CG2972	X:0875		more complex explanation
CG2974	X:0875		outside of SB and not assembled in dana
CG12645	X:0878	323	not annotated in Drosophila subgenus
CG12644	X:0879	323	not annotated in Drosophila subgenus
CG32691	X:0880	323	not annotated in Drosophila subgenus
CG32690	X:0882	323	not annotated in Drosophila subgenus
CG2968	X:0884		outside of SB and not annotated in dpse
CG2962	X:0885		outside of SB and not annotated in dpse
CG15308	X:0886		not annotated in Drosophila subgenus
CG2967	X:0887		outside of SB and not annotated in dpse
CG32689	X:0887		outside of SB and not annotated in dpse
CG2961	X:0888		outside of SB and not annotated in dyak, dpse
CG32688	X:0889		outside of SB and not annotated in dpse
CG2909	X:0892		outside of SB and not annotated in dwil, dvir, dmoj
CG2227	X:0892		outside of SB and not annotated in dwil
CG32679	X:0897		not annotated in Drosophila subgenus
CG2885	X:0901	328	not annotated in Drosophila subgenus
CG12640	X:0901	328	not annotated in Drosophila subgenus
CG2887	X:0906		outside of SB and not annotated in dpse, dgri
CG15296	X:0909	333	not annotated in Drosophila subgenus
CG9807	X:0915	334	not annotated in Drosophila subgenus
CG9806	X:0916	334	not annotated in Drosophila subgenus
CG2111	X:0917	334	not annotated in Drosophila subgenus
CG32673	X:0918	334	not annotated in Drosophila subgenus
CG12637	X:0919	334	more complex explanation
CG1826	X:0925		outside of SB and not annotated in dwil
CG15211	X:0926		outside of SB and not annotated in dwil, dvir
CG1683	X:0926		outside of SB and not annotated in dere, dyak, dana, dwil, dvir
CG16944	X:0926		outside of SB and not annotated in dwil, dvir
CG1655	X:0932		outside of SB and not annotated in dpse, dwil, dgri
CG15208	X:0937		not annotated in Drosophila subgenus
CG32671	X:0942	343	not annotated in Drosophila subgenus
CG32670	X:0942	343	not annotated in Drosophila subgenus
CG12101	X:0957		outside of SB and not annotated in dmoj
CG1394	X:0971	348	not annotated in Drosophila subgenus
CG15200	X:0972	348	not annotated in Drosophila subgenus
CG11106	X:0973	348	not annotated in Drosophila subgenus
CG11759	X:0982		outside of SB and not annotated in dvir, dmoj
CG11757	X:0983		outside of SB and not assembled in dpse
CG1597	X:0984		outside of SB and not assembled in dpse
CG11756	X:0985		not annotated in Drosophila subgenus
CG15196	X:0993		not annotated in Drosophila subgenus
CG12622	X:0994		not annotated in Drosophila subgenus
CG1749	X:1003		more complex explanation
CG1751	X:1004		more complex explanation
CG33235	X:1005		not annotated in Drosophila subgenus
CG1572	X:1007		outside of SB and not annotated in dwil
CG11709	X:1008	359	not annotated in Drosophila subgenus
CG1558	X:1009	360	not annotated in Drosophila subgenus
CG11695	X:1012		not annotated in Drosophila subgenus
CG1763	X:1013		not annotated in Drosophila subgenus
CG1561	X:1013		not annotated in Drosophila subgenus
CG2533	X:1014	362	not annotated in Drosophila subgenus
CG15741	X:1036		not annotated in Drosophila subgenus
CG1847	X:1043		outside of SB and not assembled in dana
CG11802	X:1044		outside of SB and not assembled in dana
CG15739	X:1045		outside of SB and not annotated in dmoj, dgri and not assembled in dana
CG10352	X:1046		outside of SB and not annotated in dmoj, dgri and not assembled in dana
CG10353	X:1047		outside of SB and not annotated in dmoj, dgri and not assembled in dana
CG1844	X:1048		outside of SB and not annotated in dmoj, dgri and not assembled in dana
CG1840	X:1049		not annotated in Drosophila subgenus
CG15738	X:1050		outside of SB and not assembled in dana
CG15737	X:1051		outside of SB and not assembled in dana
CG1559	X:1052		outside of SB and not assembled in dana
CG2467	X:1053		outside of SB and not assembled in dana
CG2471	X:1054		outside of SB and not assembled in dana
CG10362	X:1055		outside of SB and not assembled in dana
CG1522	X:1056		outside of SB and not assembled in dana
CG1505	X:1057		outside of SB and not assembled in dana
CG1502	X:1058		not annotated in Drosophila subgenus
CG18130	X:1059		outside of SB and not assembled in dana
CG1500	X:1060		outside of SB and not assembled in dana
CG1806	X:1061		outside of SB and not assembled in dana
CG1492	X:1061		not annotated in Drosophila subgenus
CG1488	X:1067		not annotated in Drosophila subgenus
CG1950	X:1069	380	not annotated in Drosophila subgenus
CG12721	X:1071	380	not annotated in Drosophila subgenus
CG15734	X:1072	380	not annotated in Drosophila subgenus
CG1924	X:1075	380	not annotated in Drosophila subgenus
CG32655	X:1078	380	not annotated in Drosophila subgenus
CG2577	X:1079		outside of SB and not annotated in dwil, dmoj
CG15732	X:1080		outside of SB and not annotated in dmoj, dgri
CG32651	X:1081		not annotated in Drosophila subgenus
CG32652	X:1083		not annotated in Drosophila subgenus
CG2559	X:1091	386	not annotated in Drosophila subgenus
CG17762	X:1107		not annotated in Drosophila subgenus
CG2028	X:1108		not annotated in Drosophila subgenus
CG12717	X:1113	395	not annotated in Drosophila subgenus
CG4661	X:1118		not annotated in Drosophila subgenus
CG33651	X:1119		not annotated in Drosophila subgenus
CG32643	X:1133	400	not annotated in Drosophila subgenus
CG2209	X:1135	400	not annotated in Drosophila subgenus
CG32645	X:1148		outside of SB and not annotated in dpse
CG4318	X:1149		not annotated in Drosophila subgenus
CG32640	X:1155	407	not annotated in Drosophila subgenus
CG32641	X:1156	407	not annotated in Drosophila subgenus
CG1903	X:1159		outside of SB and not annotated in dgri
CG32639	X:1161	409	not annotated in Drosophila subgenus
CG15742	X:1162	409	not annotated in Drosophila subgenus
CG32636	X:1173	415	not annotated in Drosophila subgenus
CG32634	X:1179	417	not annotated in Drosophila subgenus
CG12725	X:1184		not annotated in Drosophila subgenus
CG1681	X:1185		outside of SB and not annotated in dwil
CG1716	X:1187		outside of SB and not annotated in dvir, dmoj
CG32635	X:1188		outside of SB and not annotated in dwil
CG12726	X:1188		not annotated in Drosophila subgenus
CG15753	X:1189		outside of SB and not annotated in dwil
CG15754	X:1190		outside of SB and not annotated in dwil and not assembled in dvir
CG15756	X:1191		outside of SB and not annotated in dwil
CG15757	X:1192		outside of SB and not annotated in dwil
CG11816	X:1193		outside of SB and not annotated in dwil
CG32631	X:1194		outside of SB and not annotated in dwil
CG32633	X:1195		outside of SB and not annotated in dpse, dwil, dmoj, dgri
CG32629	X:1196		not annotated in Drosophila subgenus
CG15758	X:1197		not annotated in Drosophila subgenus
CG11177	X:1202		outside of SB and not annotated in dgri and not assembled in dpse
CG12175	X:1202		outside of SB and not assembled in dpse
CG11176	X:1203		outside of SB and not assembled in dpse
CG2691	X:1204		outside of SB and not assembled in dpse
CG11172	X:1205		outside of SB and not assembled in dpse
CG12176	X:1206		outside of SB and not assembled in dpse
CG11164	X:1207		outside of SB and not assembled in dpse
CG15760	X:1208		outside of SB and not assembled in dpse
CG11162	X:1209		not annotated in Drosophila subgenus
CG12177	X:1210		outside of SB and not annotated in dwil, dvir, dmoj
CG11158	X:1211		not annotated in Drosophila subgenus
CG9940	X:1211		more complex explanation
CG32627	X:1211		more complex explanation
CG32628	X:1211		more complex explanation
CG9941	X:1212		more complex explanation
CG10993	X:1223	428	not annotated in Drosophila subgenus
CG32606	X:1232	431	not annotated in Drosophila subgenus
CG32613	X:1233	431	not annotated in Drosophila subgenus
CG32616	X:1235	431	not annotated in Drosophila subgenus
CG33247	X:1236	431	not annotated in Drosophila subgenus
CG33246	X:1237	431	not annotated in Drosophila subgenus
CG33245	X:1238	431	not annotated in Drosophila subgenus
CG33244	X:1239	431	not annotated in Drosophila subgenus
CG33243	X:1240	431	not annotated in Drosophila subgenus
CG33242	X:1241	431	not annotated in Drosophila subgenus
CG33241	X:1242	431	not annotated in Drosophila subgenus
CG33240	X:1243	431	not annotated in Drosophila subgenus
CG33239	X:1244	431	not annotated in Drosophila subgenus
CG33238	X:1245	431	not annotated in Drosophila subgenus
CG33237	X:1246	431	not annotated in Drosophila subgenus
CG33236	X:1247	431	not annotated in Drosophila subgenus
CG12454	X:1248	431	not annotated in Drosophila subgenus
CG13402	X:1252	433	not annotated in Drosophila subgenus
CG32599	X:1269		outside of SB and not annotated in dvir
CG9400	X:1275		not annotated in Drosophila subgenus
CG18157	X:1276		not annotated in Drosophila subgenus
CG32598	X:1277		not annotated in Drosophila subgenus
CG32600	X:1278		outside of SB and not annotated in dmoj
CG32601	X:1278		not annotated in Drosophila subgenus
CG18313	X:1278		not annotated in Drosophila subgenus
CG9411	X:1279		more complex explanation
CG12540	X:1280		outside of SB and not annotated in dvir
CG14414	X:1281		more complex explanation
CG14413	X:1282		more complex explanation
CG5310	X:1283		more complex explanation
CG9413	X:1284		more complex explanation
CG18657	X:1285		outside of SB and not annotated in dana
CG5321	X:1286		outside of SB and not annotated in dana, dpse
CG10521	X:1287		outside of SB and not assembled in dana
CG32595	X:1287		not annotated in Drosophila subgenus
CG15890	X:1288		outside of SB and not assembled in dana
CG5334	X:1289		not annotated in Drosophila subgenus
CG5347	X:1290		not annotated in Drosophila subgenus
CG9540	X:1291		outside of SB and not assembled in dana
CG9538	X:1292		outside of SB and not assembled in dana
CG9533	X:1293		outside of SB and not assembled in dana
CG14408	X:1294		outside of SB and not assembled in dana
CG14410	X:1296	442	not annotated in Drosophila subgenus
CG32590	X:1298		outside of SB and not annotated in dwil
CG14406	X:1299	443	not annotated in Drosophila subgenus
CG9504	X:1299	443	not annotated in Drosophila subgenus
CG32591	X:1299	443	not annotated in Drosophila subgenus
CG9030	X:1301		not annotated in Drosophila subgenus
CG5560	X:1306		not annotated in Drosophila subgenus
CG32588	X:1319		not annotated in Drosophila subgenus
CG15030	X:1321	449	not annotated in Drosophila subgenus
CG15031	X:1323		not annotated in Drosophila subgenus
CG9106	X:1324		outside of SB and not annotated in dgri
CG6146	X:1328		outside of SB and not annotated in dwil
CG15641	X:1342	456	not annotated in Drosophila subgenus
CG6324	X:1346		not annotated in Drosophila subgenus
CG32584	X:1350	461	not annotated in Drosophila subgenus
CG7860	X:1350	461	more complex explanation
CG15643	X:1350	461	more complex explanation
CG32586	X:1356	464	not annotated in Drosophila subgenus
CG8117	X:1357		not annotated in Drosophila subgenus
CG8119	X:1358		not annotated in Drosophila subgenus
CG15599	X:1361	465	not annotated in Drosophila subgenus
CG8231	X:1374		outside of SB and not annotated in dpse
CG8239	X:1375		outside of SB and not annotated in dana, dpse
CG8948	X:1376		outside of SB and not annotated in dana, dpse
CG8260	X:1376		not annotated in Drosophila subgenus
CG8288	X:1377		outside of SB and not annotated in dana, dpse
CG17209	X:1378		outside of SB and not annotated in dpse
CG8952	X:1378		outside of SB and not annotated in dana, dpse
CG33172	X:1379		outside of SB and not annotated in dana, dpse and not assembled in dvir, dmoj
CG33173	X:1380		not annotated in Drosophila subgenus
CG8959	X:1381		not annotated in Drosophila subgenus
CG8962	X:1382		outside of SB and not annotated in dpse and not assembled in dana
CG8470	X:1383		outside of SB and not annotated in dpse, dwil
CG8497	X:1384		outside of SB and not annotated in dpse
CG8974	X:1384		outside of SB and not annotated in dana, dpse, dwil, dmoj and not assembled in dvir, dgri
CG32581	X:1385		outside of SB and not annotated in dere, dyak, dana, dpse, dvir, dgri
CG15602	X:1386		outside of SB and not annotated in dana, dpse
CG8995	X:1387		outside of SB and not annotated in dana, dpse, dwil
CG8509	X:1388		outside of SB and not annotated in dpse, dgri and not assembled in dana
CG8544	X:1389		outside of SB and not annotated in dpse, dgri
CG9012	X:1390		outside of SB and not annotated in dpse
CG32582	X:1391		not annotated in Drosophila subgenus
CG8565	X:1392		not annotated in Drosophila subgenus
CG9020	X:1393		outside of SB and not annotated in dpse and not assembled in dmoj
CG8578	X:1394		outside of SB and not annotated in dpse and not assembled in dana, dvir, dmoj
CG9032	X:1394		outside of SB and not annotated in dpse, dwil and not assembled in dana, dmoj, dgri
CG9038	X:1395		outside of SB and not annotated in dana, dpse, dvir and not assembled in dmoj
CG15914	X:1396		outside of SB and not annotated in dpse
CG9045	X:1397		outside of SB and not annotated in dana, dpse and not assembled in dvir, dmoj
CG33250	X:1398		outside of SB and not annotated in dpse, dvir and not assembled in dmoj
CG10545	X:1399		outside of SB and not annotated in dpse and not assembled in dvir, dmoj
CG8893	X:1400		not annotated in Drosophila subgenus
CG16952	X:1401		outside of SB and not annotated in dpse and not assembled in dana, dvir, dmoj
CG9056	X:1402		outside of SB and not annotated in dpse and not assembled in dvir, dmoj
CG9066	X:1403		not annotated in Drosophila subgenus
CG15916	X:1404		outside of SB and not annotated in dpse, dmoj
CG18102	X:1405		outside of SB and not annotated in dpse
CG9096	X:1406		outside of SB and not annotated in dana, dpse, dmoj and not assembled in dvir
CG8909	X:1407		outside of SB and not annotated in dpse
CG8916	X:1408		outside of SB and not annotated in dana, dpse
CG17336	X:1409		outside of SB and not annotated in dana, dpse
CG33180	X:1410		outside of SB and not annotated in dpse and not assembled in dvir, dmoj
CG9126	X:1411		outside of SB and not annotated in dpse and not assembled in dvir, dmoj
CG8924	X:1412		outside of SB and not annotated in dpse, dwil, dvir
CG8928	X:1413		outside of SB and not annotated in dpse, dmoj, dgri and not assembled in dvir
CG15603	X:1414		outside of SB and not annotated in dpse and not assembled in dana
CG15604	X:1415		outside of SB and not annotated in dpse and not assembled in dana
CG9163	X:1416		outside of SB and not annotated in dpse and not assembled in dana
CG12697	X:1417		outside of SB and not annotated in dwil, dmoj, dgri and not assembled in dvir
CG9170	X:1418		outside of SB and not annotated in dana, dpse
CG8931	X:1419		not annotated in Drosophila subgenus
CG9172	X:1420		not annotated in Drosophila subgenus
CG9177	X:1421		more complex explanation
CG8933	X:1422		outside of SB and not annotated in dana, dpse
CG8939	X:1423		outside of SB and not annotated in dpse
CG9209	X:1424		outside of SB and not annotated in dana, dpse
CG12698	X:1425		outside of SB and not annotated in dana
CG32580	X:1426		not annotated in Drosophila subgenus
CG12395	X:1427		outside of SB and not assembled in dana
CG14948	X:1428		outside of SB and not annotated in dana
CG9212	X:1429		outside of SB and not assembled in dana
CG9214	X:1430		outside of SB and not annotated in dana
CG8958	X:1431		outside of SB and not annotated in dana
CG9216	X:1432		outside of SB and not assembled in dana
CG32577	X:1433		outside of SB and not assembled in dana
CG9908	X:1434		outside of SB and not assembled in dana
CG12507	X:1435		outside of SB and not assembled in dana
CG13956	X:1436		outside of SB and not assembled in dana
CG3415	X:1436		outside of SB and not assembled in dana
CG3422	X:1437		outside of SB and not annotated in dpse and not assembled in dana
CG3525	X:1438		outside of SB and not assembled in dana
CG32576	X:1439		outside of SB and not assembled in dana
CG3560	X:1439		outside of SB and not assembled in dana
CG3606	X:1440		outside of SB and not assembled in dana
CG9911	X:1441		outside of SB and not annotated in dyak and not assembled in dana
CG3632	X:1442		outside of SB and not annotated in dyak and not assembled in dana
CG3679	X:1443		outside of SB and not annotated in dyak and not assembled in dana
CG9914	X:1444		outside of SB and not annotated in dyak and not assembled in dana
CG9915	X:1445		outside of SB and not assembled in dana
CG33251	X:1446		outside of SB and not assembled in dana
CG13957	X:1447		outside of SB and not assembled in dana
CG9916	X:1448		outside of SB and not assembled in dana
CG9917	X:1449		outside of SB and not assembled in dana
CG32579	X:1450		outside of SB and not assembled in dana
CG3692	X:1451		outside of SB and not assembled in dana
CG9919	X:1451		outside of SB and not assembled in dana
CG9921	X:1452		outside of SB and not assembled in dana
CG12223	X:1453		outside of SB and not assembled in dana
CG4200	X:1454		outside of SB and not assembled in dana
CG9998	X:1455		outside of SB and not assembled in dana
CG32578	X:1456		outside of SB and not assembled in dana
CG4211	X:1457		outside of SB and not assembled in dana
CG18734	X:1458		outside of SB and not assembled in dana
CG9992	X:1459		outside of SB and not assembled in dana
CG4239	X:1460		outside of SB and not assembled in dana
CG9984	X:1461		outside of SB and not assembled in dana
CG4252	X:1462		more complex explanation
CG9981	X:1463		outside of SB and not assembled in dana
CG4301	X:1464		outside of SB and not assembled in dana
CG4394	X:1465		outside of SB and not assembled in dana
CG9968	X:1465		outside of SB and not assembled in dana
CG9946	X:1469		outside of SB and not assembled in dgri
CG34015	X:1470		not annotated in Drosophila subgenus
CG4429	X:1471		outside of SB and not assembled in dgri
CG9906	X:1472	474	not annotated in Drosophila subgenus
CG9903	X:1473		not annotated in Drosophila subgenus
CG9902	X:1474		not annotated in Drosophila subgenus
CG9901	X:1475		not annotated in Drosophila subgenus
CG9842	X:1476		not annotated in Drosophila subgenus
CG9819	X:1477		not annotated in Drosophila subgenus
CG4443	X:1480		not annotated in Drosophila subgenus
CG4453	X:1482		outside of SB and not annotated in dvir
CG9777	X:1485	480	not annotated in Drosophila subgenus
CG32573	X:1489	483	not annotated in Drosophila subgenus
CG13012	X:1490	484	more complex explanation
CG13010	X:1491		not annotated in Drosophila subgenus
CG9699	X:1494		outside of SB and not annotated in dwil
CG4678	X:1495		not annotated in Drosophila subgenus
CG9676	X:1495		not annotated in Drosophila subgenus
CG9675	X:1495		not annotated in Drosophila subgenus
CG9673	X:1495		not annotated in Drosophila subgenus
CG4653	X:1495		not annotated in Drosophila subgenus
CG9672	X:1495		not annotated in Drosophila subgenus
CG32568	X:1498	486	not annotated in Drosophila subgenus
CG9606	X:1502	489	more complex explanation
CG4789	X:1505		outside of SB and not annotated in dwil, dvir, dmoj
CG9125	X:1506		outside of SB and not annotated in dwil, dvir, dmoj
CG13004	X:1510		outside of SB and not assembled in dpse
CG9108	X:1511		outside of SB and not annotated in dana and not assembled in dpse
CG13003	X:1512		outside of SB and not assembled in dpse
CG4872	X:1513		outside of SB and not annotated in dwil and not assembled in dpse
CG9104	X:1513		outside of SB and not assembled in dpse
CG4875	X:1514		outside of SB and not assembled in dana, dpse
CG9099	X:1514		outside of SB and not assembled in dpse
CG4880	X:1515		outside of SB and not assembled in dpse
CG13002	X:1516		outside of SB and not assembled in dpse
CG33252	X:1517		not annotated in Drosophila subgenus
CG4928	X:1518		outside of SB and not assembled in dpse
CG9089	X:1519		outside of SB and not assembled in dpse
CG13001	X:1520		outside of SB and not assembled in dpse
CG13000	X:1521		not annotated in Drosophila subgenus
CG4937	X:1522		outside of SB and not assembled in dpse
CG9086	X:1523		outside of SB and not assembled in dpse
CG12433	X:1525	493	not annotated in Drosophila subgenus
CG32561	X:1536	498	not annotated in Drosophila subgenus
CG32563	X:1542	499	not annotated in Drosophila subgenus
CG8664	X:1555		outside of SB and not annotated in dvir
CG8661	X:1556		not annotated in Drosophila subgenus
CG12991	X:1570		outside of SB and not annotated in dwil
CG12992	X:1570		not annotated in Drosophila subgenus
CG5675	X:1571		outside of SB and not annotated in dwil
CG8326	X:1573	507	not annotated in Drosophila subgenus
CG6398	X:1590		outside of SB and not annotated in dmoj
CG6474	X:1591		more complex explanation
CG8142	X:1591		more complex explanation
CG7835	X:1598	517	not annotated in Drosophila subgenus
CG6788	X:1599		not annotated in Drosophila subgenus
CG6835	X:1600		not annotated in Drosophila subgenus
CG32496	X:1601		not annotated in Drosophila subgenus
CG32494	X:1606	519	not annotated in Drosophila subgenus
CG15911	X:1608	519	not annotated in Drosophila subgenus
CG32552	X:1610		not annotated in Drosophila subgenus
CG7135	X:1618		not annotated in Drosophila subgenus
CG12612	X:1620		not annotated in Drosophila subgenus
CG32553	X:1621		not annotated in Drosophila subgenus
CG15060	X:1629	527	not annotated in Drosophila subgenus
CG15059	X:1631	527	not annotated in Drosophila subgenus
CG15058	X:1632	527	not annotated in Drosophila subgenus
CG15057	X:1633	527	not annotated in Drosophila subgenus
CG15061	X:1635	527	not annotated in Drosophila subgenus
CG6179	X:1641	528	more complex explanation
CG15056	X:1645	530	not annotated in Drosophila subgenus
CG6318	X:1656		not annotated in Drosophila subgenus
CG6407	X:1657		outside of SB and not annotated in dana, dpse
CG6481	X:1661	534	not annotated in Drosophila subgenus
CG15042	X:1662	534	not annotated in Drosophila subgenus
CG15047	X:1663	534	more complex explanation
CG6531	X:1666		outside of SB and not annotated in dpse
CG6585	X:1674	538	not annotated in Drosophila subgenus
CG12609	X:1676		outside of SB and not annotated in dpse
CG6900	X:1679		not annotated in Drosophila subgenus
CG6961	X:1680		not annotated in Drosophila subgenus
CG7001	X:1681		outside of SB and not annotated in dvir, dmoj
CG7053	X:1681		outside of SB and not annotated in dvir and not assembled in dmoj
CG7088	X:1681		not annotated in Drosophila subgenus
CG7058	X:1682		outside of SB and not annotated in dvir and not assembled in dmoj
CG7095	X:1683		outside of SB and not assembled in dvir
CG32543	X:1684		outside of SB and not assembled in dvir
CG7358	X:1697		outside of SB and not annotated in dmoj
CG14189	X:1701	547	not annotated in Drosophila subgenus
CG14190	X:1702	547	not annotated in Drosophila subgenus
CG33254	X:1703	547	not annotated in Drosophila subgenus
CG7406	X:1704	547	not annotated in Drosophila subgenus
CG14191	X:1705	547	not annotated in Drosophila subgenus
CG7423	X:1706	547	not annotated in Drosophila subgenus
CG15882	X:1707	547	not annotated in Drosophila subgenus
CG7440	X:1708	547	more complex explanation
CG15883	X:1709	547	more complex explanation
CG7453	X:1713		outside of SB and not annotated in dmoj, dgri
CG33253	X:1714		outside of SB and not annotated in dmoj, dgri
CG7635	X:1715		outside of SB and not annotated in dgri
CG14193	X:1716		not annotated in Drosophila subgenus
CG32538	X:1736		not annotated in Drosophila subgenus
CG32827	X:1737	561	not annotated in Drosophila subgenus
CG12200	X:1738	562	not annotated in Drosophila subgenus
CG12231	X:1748	566	more complex explanation
CG14218	X:1753		outside of SB and not annotated in dpse, dwil, dgri
CG14204	X:1754		not annotated in Drosophila subgenus
CG14219	X:1755		outside of SB and not annotated in dere, dpse, dwil
CG14205	X:1756		outside of SB and not annotated in dwil
CG14209	X:1760	570	not annotated in Drosophila subgenus
CG14221	X:1762		not annotated in Drosophila subgenus
CG14213	X:1767		outside of SB and not annotated in dwil
CG12237	X:1768		outside of SB and not annotated in dwil
CG14214	X:1769		outside of SB and not annotated in dwil, dgri
CG12235	X:1770		outside of SB and not annotated in dwil
CG14227	X:1779	578	not annotated in Drosophila subgenus
CG12700	X:1796	585	not annotated in Drosophila subgenus
CG11941	X:1797	585	not annotated in Drosophila subgenus
CG11942	X:1798	585	not annotated in Drosophila subgenus
CG15618	X:1801		more complex explanation
CG11937	X:1802	587	not annotated in Drosophila subgenus
CG32821	X:1803		not annotated in Drosophila subgenus
CG9570	X:1808	588	not annotated in Drosophila subgenus
CG9571	X:1809	588	not annotated in Drosophila subgenus
CG32825	X:1810	588	not annotated in Drosophila subgenus
CG15323	X:1811	588	not annotated in Drosophila subgenus
CG12656	X:1812	588	not annotated in Drosophila subgenus
CG32824	X:1814	588	not annotated in Drosophila subgenus
CG9579	X:1820	589	more complex explanation
CG9580	X:1821		not annotated in Drosophila subgenus
CG33491	X:1822		not annotated in Drosophila subgenus
CG33497	X:1823		not annotated in Drosophila subgenus
CG33496	X:1824		not annotated in Drosophila subgenus
CG32823	X:1825		not annotated in Drosophila subgenus
CG33487	X:1826		not annotated in Drosophila subgenus
CG33499	X:1827		not annotated in Drosophila subgenus
CG33498	X:1828		not annotated in Drosophila subgenus
CG1631	X:1835		not annotated in Drosophila subgenus
CG15462	X:1836		not annotated in Drosophila subgenus
CG12679	X:1837		not annotated in Drosophila subgenus
CG15460	X:1838		not annotated in Drosophila subgenus
CG15461	X:1854	599	not annotated in Drosophila subgenus
CG32504	X:1857		not annotated in Drosophila subgenus
CG11692	X:1862	601	not annotated in Drosophila subgenus
CG1835	X:1864	601	not annotated in Drosophila subgenus
CG1338	X:1864	601	not annotated in Drosophila subgenus
CG1324	X:1866	601	not annotated in Drosophila subgenus
CG32507	X:1868	601	not annotated in Drosophila subgenus
CG1314	X:1871		not annotated in Drosophila subgenus
CG11235	X:1872		not annotated in Drosophila subgenus
CG32509	X:1874		not annotated in Drosophila subgenus
CG11230	X:1875		not annotated in Drosophila subgenus
CG2071	X:1879		outside of SB and not annotated in dpse, dmoj, dgri
CG1304	X:1880		outside of SB and not annotated in dwil, dvir, dgri
CG11666	X:1881		not annotated in Drosophila subgenus
CG1529	X:1884		more complex explanation
CG1740	X:1885		not annotated in Drosophila subgenus
CG15449	X:1886		not annotated in Drosophila subgenus
CG1742	X:1887		not annotated in Drosophila subgenus
CG32510	X:1887		not annotated in Drosophila subgenus
CG1753	X:1888		more complex explanation
CG10987	X:1890	606	not annotated in Drosophila subgenus
CG15446	X:1891	607	not annotated in Drosophila subgenus
CG1503	X:1891	607	not annotated in Drosophila subgenus
CG32511	X:1895		not annotated in Drosophila subgenus
CG14579	X:1896		not annotated in Drosophila subgenus
CG1724	X:1897		not annotated in Drosophila subgenus
CG32523	X:1898	609	not annotated in Drosophila subgenus
CG14580	X:1898	609	not annotated in Drosophila subgenus
CG1722	X:1898	609	not annotated in Drosophila subgenus
CG14581	X:1898	609	not annotated in Drosophila subgenus
CG1666	X:1913		more complex explanation
CG1678	X:1916	615	not annotated in Drosophila subgenus
CG34019	X:1917	615	not annotated in Drosophila subgenus
CG10918	X:1918	615	not annotated in Drosophila subgenus
CG14584	X:1922		not annotated in Drosophila subgenus
CG1644	X:1923		not annotated in Drosophila subgenus
CG32822	X:1924		not annotated in Drosophila subgenus
CG33502	X:1927		not annotated in Drosophila subgenus
CG32820	X:1928		not annotated in Drosophila subgenus
CG32857	X:1929		not annotated in Drosophila subgenus
CG32819	X:1930		not annotated in Drosophila subgenus
CG32500	X:1931		outside of SB and not annotated in dpse, dwil, dvir
CG17686	X:1932		outside of SB and not annotated in dana, dwil, dvir
CG14621	X:1933		outside of SB and not annotated in dwil
CG14615	X:1934		outside of SB and not annotated in dwil
CG14618	X:1939	619	more complex explanation
CG17601	X:1944		outside of SB and not annotated in dpse, dwil, dmoj, dgri
CG32499	X:1945		outside of SB and not annotated in dwil, dmoj, dgri
CG12446	X:1946		outside of SB and not annotated in dwil, dmoj, dgri
CG9559	X:1947		outside of SB and not annotated in dwil, dmoj, dgri
CG11023	2L:0001		not annotated in Drosophila subgenus
CG2657	2L:0003		more complex explanation
CG31973	2L:0004		outside of SB and not assembled in dwil
CG11371	2L:0005		outside of SB and not assembled in dwil
CG11372	2L:0006		outside of SB and not assembled in dwil
CG11374	2L:0007		outside of SB and not assembled in dwil
CG11450	2L:0008		outside of SB and not assembled in dwil
CG11376	2L:0009		outside of SB and not assembled in dwil
CG13694	2L:0012		not annotated in Drosophila subgenus
CG3645	2L:0031		outside of SB and not assembled in dwil
CG17075	2L:0031		outside of SB and not assembled in dwil
CG3345	2L:0031		outside of SB and not assembled in dwil
CG11604	2L:0032		outside of SB and not assembled in dwil
CG11555	2L:0032		outside of SB and not assembled in dwil
CG17078	2L:0033		outside of SB and not assembled in dwil
CG11601	2L:0034	629	not annotated in Drosophila subgenus
CG13689	2L:0073		not annotated in Drosophila subgenus
CG13686	2L:0074		not annotated in Drosophila subgenus
CG2826	2L:0075		not annotated in Drosophila subgenus
CG2839	2L:0076		not annotated in Drosophila subgenus
CG2830	2L:0078	644	not annotated in Drosophila subgenus
CG12506	2L:0081	644	not annotated in Drosophila subgenus
CG13946	2L:0082	644	not annotated in Drosophila subgenus
CG13947	2L:0083	644	not annotated in Drosophila subgenus
CG31658	2L:0086		not annotated in Drosophila subgenus
CG11297	2L:0102	648	not annotated in Drosophila subgenus
CG4178	2L:0103	648	not annotated in Drosophila subgenus
CG31923	2L:0105	648	not annotated in Drosophila subgenus
CG4375	2L:0106	649	not annotated in Drosophila subgenus
CG34016	2L:0109	651	not annotated in Drosophila subgenus
CG4715	2L:0114	652	not annotated in Drosophila subgenus
CG5126	2L:0125	654	more complex explanation
CG5011	2L:0129		not annotated in Drosophila subgenus
CG14343	2L:0131		not annotated in Drosophila subgenus
CG5156	2L:0132		not annotated in Drosophila subgenus
CG5440	2L:0136	656	not annotated in Drosophila subgenus
CG33923	2L:0137	656	not annotated in Drosophila subgenus
CG33922	2L:0138	656	not annotated in Drosophila subgenus
CG5556	2L:0140	656	more complex explanation
CG31924	2L:0141	656	not annotated in Drosophila subgenus
CG14346	2L:0145	656	more complex explanation
CG31925	2L:0147	656	not annotated in Drosophila subgenus
CG31926	2L:0150	656	not annotated in Drosophila subgenus
CG31661	2L:0151	656	not annotated in Drosophila subgenus
CG18132	2L:0154		not annotated in Drosophila subgenus
CG12193	2L:0156	657	more complex explanation
CG4231	2L:0157	657	more complex explanation
CG10869	2L:0158	657	more complex explanation
CG14352	2L:0159	657	not annotated in Drosophila subgenus
CG31934	2L:0161	658	not annotated in Drosophila subgenus
CG31932	2L:0172		not annotated in Drosophila subgenus
CG17650	2L:0173		not annotated in Drosophila subgenus
CG31936	2L:0174		not annotated in Drosophila subgenus
CG31929	2L:0175		not annotated in Drosophila subgenus
CG31931	2L:0176		not annotated in Drosophila subgenus
CG31662	2L:0177		outside of SB and not annotated in dana, dpse, dgri
CG31933	2L:0178		not annotated in Drosophila subgenus
CG31664	2L:0179		not annotated in Drosophila subgenus
CG15358	2L:0183	663	not annotated in Drosophila subgenus
CG15357	2L:0185		not annotated in Drosophila subgenus
CG33673	2L:0186		outside of SB and not annotated in dwil
CG31941	2L:0193		not annotated in Drosophila subgenus
CG31672	2L:0200	669	not annotated in Drosophila subgenus
CG33516	2L:0202		outside of SB and not annotated in dvir, dmoj
CG12674	2L:0202		outside of SB and not annotated in dpse, dmoj, dgri
CG4259	2L:0203		not annotated in Drosophila subgenus
CG15383	2L:0209	673	not annotated in Drosophila subgenus
CG31668	2L:0211	673	not annotated in Drosophila subgenus
CG33124	2L:0212	673	not annotated in Drosophila subgenus
CG31686	2L:0225	676	not annotated in Drosophila subgenus
CG17234	2L:0228	677	not annotated in Drosophila subgenus
CG17012	2L:0229	677	not annotated in Drosophila subgenus
CG34049	2L:0231		not annotated in Drosophila subgenus
CG17242	2L:0232		not annotated in Drosophila subgenus
CG4271	2L:0233		not annotated in Drosophila subgenus
CG31681	2L:0234		not annotated in Drosophila subgenus
CG31949	2L:0237	679	not annotated in Drosophila subgenus
CG31948	2L:0251	682	not annotated in Drosophila subgenus
CG3240	2L:0262		more complex explanation
CG15394	2L:0268		not annotated in Drosophila subgenus
CG2859	2L:0285	691	not annotated in Drosophila subgenus
CG2964	2L:0290		not annotated in Drosophila subgenus
CG3123	2L:0293	694	not annotated in Drosophila subgenus
CG18557	2L:0298		not annotated in Drosophila subgenus
CG3117	2L:0299		not annotated in Drosophila subgenus
CG18627	2L:0307	699	more complex explanation
CG3181	2L:0310		outside of SB and not annotated in dwil
CG9641	2L:0312	702	not annotated in Drosophila subgenus
CG9643	2L:0314		outside of SB and not annotated in dgri
CG17224	2L:0319	705	not annotated in Drosophila subgenus
CG17223	2L:0320	705	more complex explanation
CG17261	2L:0329		not annotated in Drosophila subgenus
CG8822	2L:0332	711	not annotated in Drosophila subgenus
CG15403	2L:0332	711	not annotated in Drosophila subgenus
CG31953	2L:0336		not annotated in Drosophila subgenus
CG18555	2L:0338		not annotated in Drosophila subgenus
CG3485	2L:0339		not annotated in Drosophila subgenus
CG31698	2L:0340		not annotated in Drosophila subgenus
CG15404	2L:0341		not annotated in Drosophila subgenus
CG8829	2L:0342		not annotated in Drosophila subgenus
CG15405	2L:0343		not annotated in Drosophila subgenus
CG3347	2L:0344		not annotated in Drosophila subgenus
CG3332	2L:0345		not annotated in Drosophila subgenus
CG9664	2L:0346		outside of SB and not annotated in dwil
CG9663	2L:0347		outside of SB and not annotated in dwil
CG8838	2L:0357	715	not annotated in Drosophila subgenus
CG15411	2L:0359		not annotated in Drosophila subgenus
CG8840	2L:0363	717	not annotated in Drosophila subgenus
CG31952	2L:0363	717	not annotated in Drosophila subgenus
CG31776	2L:0372	720	not annotated in Drosophila subgenus
CG31956	2L:0373	720	not annotated in Drosophila subgenus
CG3212	2L:0382	721	not annotated in Drosophila subgenus
CG31955	2L:0403	722	not annotated in Drosophila subgenus
CG3410	2L:0405	722	not annotated in Drosophila subgenus
CG31960	2L:0411		not annotated in Drosophila subgenus
CG31958	2L:0412		not annotated in Drosophila subgenus
CG3920	2L:0414		outside of SB and not assembled in dgri
CG4099	2L:0428		not annotated in Drosophila subgenus
CG2955	2L:0429		not annotated in Drosophila subgenus
CG2958	2L:0432	727	not annotated in Drosophila subgenus
CG3675	2L:0438	730	not annotated in Drosophila subgenus
CG12677	2L:0451	735	not annotated in Drosophila subgenus
CG15433	2L:0454	736	more complex explanation
CG15436	2L:0462		not annotated in Drosophila subgenus
CG15636	2L:0464	743	not annotated in Drosophila subgenus
CG15635	2L:0465	743	not annotated in Drosophila subgenus
CG15632	2L:0470	743	more complex explanation
CG3047	2L:0494		not annotated in Drosophila subgenus
CG8871	2L:0497		not annotated in Drosophila subgenus
CG8869	2L:0498		not annotated in Drosophila subgenus
CG8867	2L:0499		not annotated in Drosophila subgenus
CG31917	2L:0512		outside of SB and not assembled in dwil
CG31918	2L:0520	763	not annotated in Drosophila subgenus
CG6081	2L:0530		not annotated in Drosophila subgenus
CG10833	2L:0531		not annotated in Drosophila subgenus
CG7742	2L:0531		outside of SB and not annotated in dgri and not assembled in dwil
CG14034	2L:0532		outside of SB and not annotated in dpse, dwil, dmoj, dgri
CG6514	2L:0533		outside of SB and not assembled in dwil, dvir, dmoj
CG14026	2L:0533		outside of SB and not assembled in dwil
CG14033	2L:0533		not annotated in Drosophila subgenus
CG14032	2L:0534		outside of SB and not annotated in dwil, dvir, dmoj
CG17970	2L:0535		not annotated in Drosophila subgenus
CG14031	2L:0536		not annotated in Drosophila subgenus
CG14027	2L:0543	771	not annotated in Drosophila subgenus
CG31647	2L:0548	773	not annotated in Drosophila subgenus
CG6907	2L:0553		more complex explanation
CG14017	2L:0561	776	not annotated in Drosophila subgenus
CG31913	2L:0577	781	not annotated in Drosophila subgenus
CG9029	2L:0585	784	not annotated in Drosophila subgenus
CG9024	2L:0586	784	not annotated in Drosophila subgenus
CG8982	2L:0587	784	not annotated in Drosophila subgenus
CG14000	2L:0589	785	not annotated in Drosophila subgenus
CG9016	2L:0590	785	not annotated in Drosophila subgenus
CG18340	2L:0602		outside of SB and not annotated in dwil
CG9162	2L:0627		not annotated in Drosophila subgenus
CG5972	2L:0631	790	more complex explanation
CG13989	2L:0637	793	not annotated in Drosophila subgenus
CG13988	2L:0638	793	not annotated in Drosophila subgenus
CG9481	2L:0640		outside of SB and not annotated in dere, dana
CG9500	2L:0651		not annotated in Drosophila subgenus
CG9531	2L:0666		outside of SB and not annotated in dgri
CG34009	2L:0684		not annotated in Drosophila subgenus
CG11053	2L:0685		not annotated in Drosophila subgenus
CG31634	2L:0686		outside of SB and not annotated in dmoj
CG31633	2L:0689		not annotated in Drosophila subgenus
CG13771	2L:0692		outside of SB and not annotated in dwil
CG11322	2L:0704	810	not annotated in Drosophila subgenus
CG17376	2L:0709		not annotated in Drosophila subgenus
CG32828	2L:0713	811	not annotated in Drosophila subgenus
CG10354	2L:0720	814	more complex explanation
CG31907	2L:0742	823	not annotated in Drosophila subgenus
CG31909	2L:0756	825	not annotated in Drosophila subgenus
CG13785	2L:0757	825	not annotated in Drosophila subgenus
CG15818	2L:0768	826	not annotated in Drosophila subgenus
CG6641	2L:0779		not annotated in Drosophila subgenus
CG6717	2L:0783	829	not annotated in Drosophila subgenus
CG6730	2L:0784	829	not annotated in Drosophila subgenus
CG33296	2L:0792	832	not annotated in Drosophila subgenus
CG13793	2L:0793	832	not annotated in Drosophila subgenus
CG13794	2L:0794	832	not annotated in Drosophila subgenus
CG13795	2L:0795	832	not annotated in Drosophila subgenus
CG7171	2L:0805		outside of SB and not annotated in dvir, dgri
CG7106	2L:0819	842	not annotated in Drosophila subgenus
CG31902	2L:0824	842	not annotated in Drosophila subgenus
CG33121	2L:0825	842	not annotated in Drosophila subgenus
CG14532	2L:0827	842	not annotated in Drosophila subgenus
CG7224	2L:0832		outside of SB and not annotated in dwil
CG7221	2L:0832		outside of SB and not annotated in dwil
CG7219	2L:0833		outside of SB and not annotated in dwil
CG12560	2L:0834		outside of SB and not annotated in dwil
CG34010	2L:0835		outside of SB and not annotated in dwil
CG18780	2L:0842	847	more complex explanation
CG8673	2L:0847		not annotated in Drosophila subgenus
CG12375	2L:0847		outside of SB and not annotated in dpse
CG31606	2L:0849	849	not annotated in Drosophila subgenus
CG8137	2L:0865	854	not annotated in Drosophila subgenus
CG13394	2L:0890	864	not annotated in Drosophila subgenus
CG17797	2L:0891	864	not annotated in Drosophila subgenus
CG17799	2L:0892	864	not annotated in Drosophila subgenus
CG31893	2L:0893	864	not annotated in Drosophila subgenus
CG13385	2L:0895	864	not annotated in Drosophila subgenus
CG31898	2L:0897	865	not annotated in Drosophila subgenus
CG31894	2L:0901	866	not annotated in Drosophila subgenus
CG33194	2L:0910	869	not annotated in Drosophila subgenus
CG13088	2L:0912	869	not annotated in Drosophila subgenus
CG13095	2L:0913	869	not annotated in Drosophila subgenus
CG13091	2L:0918		not annotated in Drosophila subgenus
CG9463	2L:0932	882	not annotated in Drosophila subgenus
CG9465	2L:0933	882	not annotated in Drosophila subgenus
CG9466	2L:0934	882	not annotated in Drosophila subgenus
CG9468	2L:0935	882	not annotated in Drosophila subgenus
CG32988	2L:0939	884	not annotated in Drosophila subgenus
CG9573	2L:0960	888	not annotated in Drosophila subgenus
CG18241	2L:0964	889	not annotated in Drosophila subgenus
CG31887	2L:0967	889	not annotated in Drosophila subgenus
CG17011	2L:0972		not annotated in Drosophila subgenus
CG3748	2L:0977		not annotated in Drosophila subgenus
CG13110	2L:0978		not annotated in Drosophila subgenus
CG4438	2L:0982	893	not annotated in Drosophila subgenus
CG33723	2L:0988	894	not annotated in Drosophila subgenus
CG31883	2L:0992	896	not annotated in Drosophila subgenus
CG31709	2L:0999	899	not annotated in Drosophila subgenus
CG31882	2L:1005		not annotated in Drosophila subgenus
CG31710	2L:1010	901	not annotated in Drosophila subgenus
CG4105	2L:1013	901	not annotated in Drosophila subgenus
CG18854	2L:1021	902	not annotated in Drosophila subgenus
CG31880	2L:1024	903	not annotated in Drosophila subgenus
CG33300	2L:1029		not annotated in Drosophila subgenus
CG13130	2L:1047	908	not annotated in Drosophila subgenus
CG31875	2L:1048	908	not annotated in Drosophila subgenus
CG13127	2L:1053	908	not annotated in Drosophila subgenus
CG33301	2L:1055	908	not annotated in Drosophila subgenus
CG13135	2L:1064	910	not annotated in Drosophila subgenus
CG13137	2L:1069	910	not annotated in Drosophila subgenus
CG31874	2L:1070	910	not annotated in Drosophila subgenus
CG5739	2L:1073		not annotated in Drosophila subgenus
CG5734	2L:1074		outside of SB and not annotated in dmoj
CG5731	2L:1075		not annotated in Drosophila subgenus
CG5727	2L:1076		outside of SB and not annotated in dpse and not assembled in dwil
CG4901	2L:1077		not annotated in Drosophila subgenus
CG5722	2L:1078		not annotated in Drosophila subgenus
CG4904	2L:1079		outside of SB and not annotated in dpse, dwil, dgri and not assembled in dvir
CG4908	2L:1080		outside of SB and not annotated in dwil and not assembled in dvir
CG5708	2L:1081		outside of SB and not annotated in dwil, dvir
CG5694	2L:1082		outside of SB and not annotated in dpse
CG4912	2L:1083		not annotated in Drosophila subgenus
CG31720	2L:1084		outside of SB and not annotated in dpse, dwil, dvir, dmoj
CG4916	2L:1085		outside of SB and not annotated in dpse, dwil
CG5686	2L:1086		outside of SB and not annotated in dpse, dwil, dvir
CG5680	2L:1087		outside of SB and not annotated in dpse and not assembled in dwil
CG31717	2L:1088		outside of SB and not assembled in dwil
CG4926	2L:1089		outside of SB and not annotated in dpse, dmoj and not assembled in dwil
CG5676	2L:1089		outside of SB and not annotated in dpse, dwil, dmoj and not assembled in dvir, dgri
CG5671	2L:1090		outside of SB and not annotated in dpse
CG5655	2L:1091		outside of SB and not annotated in dpse and not assembled in dwil
CG18619	2L:1092		outside of SB and not annotated in dpse, dvir and not assembled in dwil
CG4946	2L:1093		outside of SB and not annotated in dpse, dwil, dmoj, dgri
CG4953	2L:1094		outside of SB and not annotated in dpse and not assembled in dwil
CG4957	2L:1095		outside of SB and not annotated in dpse, dwil, dmoj, dgri
CG31873	2L:1096		outside of SB and not annotated in dpse and not assembled in dwil
CG5619	2L:1096		outside of SB and not annotated in dpse and not assembled in dwil, dvir
CG5640	2L:1097		outside of SB and not assembled in dwil
CG34043	2L:1098		not annotated in Drosophila subgenus
CG5604	2L:1099		outside of SB and not annotated in dpse and not assembled in dwil
CG18144	2L:1100		outside of SB and not annotated in dpse, dgri and not assembled in dwil
CG5603	2L:1101		outside of SB and not assembled in dwil
CG13138	2L:1102		outside of SB and not annotated in dpse, dwil, dgri
CG5395	2L:1103		outside of SB and not annotated in dpse, dwil, dmoj, dgri
CG5390	2L:1104		outside of SB and not annotated in dpse, dwil, dgri
CG4968	2L:1105		outside of SB and not annotated in dpse, dmoj and not assembled in dwil
CG5387	2L:1106		outside of SB and not annotated in dpse and not assembled in dwil, dvir
CG5385	2L:1107		outside of SB and not annotated in dpse, dwil, dmoj, dgri
CG5384	2L:1108		outside of SB and not assembled in dwil
CG4972	2L:1109		outside of SB and not annotated in dpse, dmoj and not assembled in dwil, dvir
CG5381	2L:1109		not annotated in Drosophila subgenus
CG4995	2L:1110		outside of SB and not annotated in dpse, dwil, dvir, dmoj
CG5371	2L:1111		outside of SB and not annotated in dpse and not assembled in dwil, dvir
CG5375	2L:1112		not annotated in Drosophila subgenus
CG5037	2L:1113		outside of SB and not annotated in dpse and not assembled in dwil
CG5034	2L:1114		outside of SB and not annotated in dpse, dwil, dvir
CG5029	2L:1115		outside of SB and not annotated in dpse, dwil
CG31715	2L:1116		not annotated in Drosophila subgenus
CG5025	2L:1117		outside of SB and not annotated in dpse, dwil, dvir, dmoj
CG5022	2L:1118		outside of SB and not annotated in dpse, dwil, dvir, dmoj
CG13141	2L:1119		outside of SB and not annotated in dwil, dmoj, dgri
CG5369	2L:1120		outside of SB and not annotated in dpse, dwil, dmoj, dgri
CG5367	2L:1121		not annotated in Drosophila subgenus
CG5045	2L:1122		outside of SB and not annotated in dpse
CG5366	2L:1123		outside of SB and not annotated in dpse
CG5052	2L:1124		not annotated in Drosophila subgenus
CG13139	2L:1125		outside of SB and not annotated in dpse
CG5056	2L:1126		outside of SB and not assembled in dwil
CG33304	2L:1127		outside of SB and not annotated in dwil
CG33303	2L:1128		outside of SB and not annotated in dpse and not assembled in dwil, dvir
CG13140	2L:1129		outside of SB and not annotated in dwil, dvir, dmoj
CG5091	2L:1130		not annotated in Drosophila subgenus
CG5096	2L:1130		outside of SB and not annotated in dpse, dvir
CG5363	2L:1131		outside of SB and not annotated in dpse and not assembled in dwil, dvir
CG5108	2L:1132		outside of SB and not annotated in dpse, dmoj and not assembled in dwil, dvir
CG5102	2L:1133		outside of SB and not annotated in dpse and not assembled in dwil, dvir
CG5362	2L:1134		outside of SB and not annotated in dpse, dwil
CG31716	2L:1135		outside of SB and not annotated in dpse and not assembled in dwil
CG17768	2L:1136		not annotated in Drosophila subgenus
CG33677	2L:1136		outside of SB and not annotated in dpse and not assembled in dwil
CG31718	2L:1137		outside of SB and not annotated in dpse, dmoj, dgri
CG5271	2L:1138		outside of SB and not annotated in dpse and not assembled in dwil
CG5277	2L:1138		outside of SB and not annotated in dpse and not assembled in dwil
CG5355	2L:1139		outside of SB and not annotated in dpse, dwil
CG5300	2L:1140		outside of SB and not annotated in dwil
CG5354	2L:1142		not annotated in Drosophila subgenus
CG5188	2L:1145		outside of SB and not annotated in dpse
CG5343	2L:1145		outside of SB and not annotated in dpse
CG5322	2L:1152		not annotated in Drosophila subgenus
CG6206	2L:1153		outside of SB and not annotated in dpse
CG31719	2L:1154		outside of SB and not annotated in dpse
CG6187	2L:1155		outside of SB and not annotated in dpse
CG6176	2L:1156		outside of SB and not annotated in dpse
CG7456	2L:1156		outside of SB and not annotated in dpse
CG6144	2L:1157		outside of SB and not assembled in dwil
CG13144	2L:1158		outside of SB and not assembled in dwil
CG7438	2L:1159		outside of SB and not assembled in dwil
CG7363	2L:1166	922	not annotated in Drosophila subgenus
CG17097	2L:1170	922	not annotated in Drosophila subgenus
CG17098	2L:1171	922	not annotated in Drosophila subgenus
CG31871	2L:1172	922	not annotated in Drosophila subgenus
CG17105	2L:1174	922	not annotated in Drosophila subgenus
CG17107	2L:1175	922	not annotated in Drosophila subgenus
CG7296	2L:1177	922	not annotated in Drosophila subgenus
CG7294	2L:1178	922	not annotated in Drosophila subgenus
CG6737	2L:1188		not annotated in Drosophila subgenus
CG18561	2L:1196	927	not annotated in Drosophila subgenus
CG6508	2L:1197	927	not annotated in Drosophila subgenus
CG17134	2L:1197	927	not annotated in Drosophila subgenus
CG6620	2L:1204	928	more complex explanation
CG14071	2L:1207		outside of SB and not annotated in dpse
CG14070	2L:1208		outside of SB and not annotated in dpse, dwil, dmoj, dgri
CG7309	2L:1209		outside of SB and not annotated in dpse, dwil
CG14069	2L:1210		outside of SB and not annotated in dpse
CG33507	2L:1211		outside of SB and not annotated in dpse
CG14072	2L:1212		not annotated in Drosophila subgenus
CG33129	2L:1213		outside of SB and not annotated in dpse
CG4621	2L:1214		more complex explanation
CG16743	2L:1215		not annotated in Drosophila subgenus
CG6093	2L:1216		outside of SB and not annotated in dpse, dmoj
CG6105	2L:1217		outside of SB and not annotated in dpse
CG4636	2L:1218	930	more complex explanation
CG16834	2L:1222		not annotated in Drosophila subgenus
CG6141	2L:1223		outside of SB and not annotated in dpse
CG4579	2L:1224		outside of SB and not annotated in dpse
CG16840	2L:1224		outside of SB and not annotated in dpse
CG4584	2L:1225		outside of SB and not assembled in dwil
CG18666	2L:1226	932	not annotated in Drosophila subgenus
CG14914	2L:1227	932	not annotated in Drosophila subgenus
CG6392	2L:1247	936	not annotated in Drosophila subgenus
CG14926	2L:1252	936	not annotated in Drosophila subgenus
CG4922	2L:1255	936	not annotated in Drosophila subgenus
CG14928	2L:1257		outside of SB and not assembled in dwil
CG6509	2L:1258		outside of SB and not assembled in dwil
CG4970	2L:1259		not annotated in Drosophila subgenus
CG14929	2L:1259		not annotated in Drosophila subgenus
CG14930	2L:1259		not annotated in Drosophila subgenus
CG6541	2L:1262	937	not annotated in Drosophila subgenus
CG15841	2L:1263	937	not annotated in Drosophila subgenus
CG6555	2L:1263	937	not annotated in Drosophila subgenus
CG6589	2L:1264	937	not annotated in Drosophila subgenus
CG12307	2L:1267		not annotated in Drosophila subgenus
CG4988	2L:1269	939	not annotated in Drosophila subgenus
CG14932	2L:1272	940	not annotated in Drosophila subgenus
CG16960	2L:1280	942	not annotated in Drosophila subgenus
CG16961	2L:1281	942	not annotated in Drosophila subgenus
CG16964	2L:1284		not annotated in Drosophila subgenus
CG17745	2L:1285		not annotated in Drosophila subgenus
CG31866	2L:1291		outside of SB and not annotated in dere, dyak, dwil
CG18789	2L:1292		outside of SB and not annotated in dere, dyak, dmoj, dgri
CG31864	2L:1293		not annotated in Drosophila subgenus
CG31865	2L:1294		not annotated in Drosophila subgenus
CG18787	2L:1294		outside of SB and not annotated in dana, dpse, dwil, dvir
CG14945	2L:1304		outside of SB and not assembled in dwil
CG12317	2L:1304		outside of SB and not assembled in dwil
CG5317	2L:1305		outside of SB and not assembled in dwil
CG7061	2L:1306		outside of SB and not assembled in dwil
CG14946	2L:1307		outside of SB and not assembled in dwil
CG14947	2L:1308		outside of SB and not assembled in dwil
CG6716	2L:1309		outside of SB and not assembled in dwil
CG5325	2L:1310		outside of SB and not assembled in dwil
CG6712	2L:1310		outside of SB and not assembled in dwil
CG10692	2L:1311		outside of SB and not assembled in dwil
CG5336	2L:1312		outside of SB and not assembled in dwil
CG6618	2L:1312		outside of SB and not assembled in dwil
CG5353	2L:1313		outside of SB and not assembled in dwil
CG6601	2L:1314		outside of SB and not assembled in dwil
CG16996	2L:1315		outside of SB and not assembled in dwil
CG16997	2L:1316		not annotated in Drosophila subgenus
CG31861	2L:1320	951	not annotated in Drosophila subgenus
CG31759	2L:1324	953	more complex explanation
CG31862	2L:1325	953	more complex explanation
CG17010	2L:1326	953	not annotated in Drosophila subgenus
CG15494	2L:1332	956	not annotated in Drosophila subgenus
CG5418	2L:1338		not annotated in Drosophila subgenus
CG17024	2L:1339		not annotated in Drosophila subgenus
CG31859	2L:1342	958	not annotated in Drosophila subgenus
CG17031	2L:1343	958	not annotated in Drosophila subgenus
CG15488	2L:1344	958	not annotated in Drosophila subgenus
CG6153	2L:1348	959	not annotated in Drosophila subgenus
CG15484	2L:1353	962	not annotated in Drosophila subgenus
CG15483	2L:1358		outside of SB and not annotated in dwil
CG5983	2L:1360		not annotated in Drosophila subgenus
CG17174	2L:1361		not annotated in Drosophila subgenus
CG17176	2L:1362		not annotated in Drosophila subgenus
CG17178	2L:1363		not annotated in Drosophila subgenus
CG31856	2L:1373	967	not annotated in Drosophila subgenus
CG5142	2L:1374	967	more complex explanation
CG5122	2L:1375	967	not annotated in Drosophila subgenus
CG9928	2L:1376	967	not annotated in Drosophila subgenus
CG16978	2L:1377	967	not annotated in Drosophila subgenus
CG9431	2L:1388		not annotated in Drosophila subgenus
CG5648	2L:1395		not annotated in Drosophila subgenus
CG31730	2L:1402		outside of SB and not annotated in dmoj, dgri
CG10859	2L:1425	982	not annotated in Drosophila subgenus
CG16954	2L:1432	982	not annotated in Drosophila subgenus
CG31846	2L:1434	982	not annotated in Drosophila subgenus
CG9254	2L:1437	984	not annotated in Drosophila subgenus
CG33697	2L:1443		outside of SB and not annotated in dgri
CG31845	2L:1445	985	not annotated in Drosophila subgenus
CG16888	2L:1452		not annotated in Drosophila subgenus
CG16870	2L:1463		not annotated in Drosophila subgenus
CG31770	2L:1471	993	not annotated in Drosophila subgenus
CG8864	2L:1473	993	not annotated in Drosophila subgenus
CG33681	2L:1476	994	not annotated in Drosophila subgenus
CG31840	2L:1477		not annotated in Drosophila subgenus
CG31771	2L:1480	995	not annotated in Drosophila subgenus
CG32973	2L:1483	995	not annotated in Drosophila subgenus
CG31769	2L:1486	995	not annotated in Drosophila subgenus
CG15292	2L:1487	995	not annotated in Drosophila subgenus
CG32971	2L:1491	995	not annotated in Drosophila subgenus
CG18125	2L:1494	997	not annotated in Drosophila subgenus
CG3478	2L:1501		not annotated in Drosophila subgenus
CG33648	2L:1507	1001	not annotated in Drosophila subgenus
CG3473	2L:1509		not annotated in Drosophila subgenus
CG15282	2L:1511		outside of SB and not annotated in dmoj, dgri
CG12636	2L:1512		not annotated in Drosophila subgenus
CG33482	2L:1513		not annotated in Drosophila subgenus
CG15281	2L:1516		not annotated in Drosophila subgenus
CG4691	2L:1517		not annotated in Drosophila subgenus
CG4650	2L:1520	1005	not annotated in Drosophila subgenus
CG18636	2L:1521	1005	not annotated in Drosophila subgenus
CG18420	2L:1522	1005	not annotated in Drosophila subgenus
CG33309	2L:1524		not annotated in Drosophila subgenus
CG3491	2L:1531	1008	not annotated in Drosophila subgenus
CG31834	2L:1533	1008	not annotated in Drosophila subgenus
CG31832	2L:1539	1010	not annotated in Drosophila subgenus
CG33679	2L:1543		not annotated in Drosophila subgenus
CG15267	2L:1551		not annotated in Drosophila subgenus
CG3975	2L:1551		not annotated in Drosophila subgenus
CG31829	2L:1554	1013	not annotated in Drosophila subgenus
CG15263	2L:1556	1013	not annotated in Drosophila subgenus
CG31830	2L:1557	1013	not annotated in Drosophila subgenus
CG15260	2L:1558	1013	not annotated in Drosophila subgenus
CG31733	2L:1559	1013	not annotated in Drosophila subgenus
CG31828	2L:1564		not annotated in Drosophila subgenus
CG11865	2L:1577		outside of SB and not annotated in dana
CG17868	2L:1578		outside of SB and not annotated in dvir
CG31825	2L:1582	1022	not annotated in Drosophila subgenus
CG18477	2L:1583	1022	not annotated in Drosophila subgenus
CG18478	2L:1584	1022	not annotated in Drosophila subgenus
CG33311	2L:1585	1022	not annotated in Drosophila subgenus
CG31780	2L:1586	1022	not annotated in Drosophila subgenus
CG31827	2L:1587	1022	not annotated in Drosophila subgenus
CG4148	2L:1593	1023	not annotated in Drosophila subgenus
CG18109	2L:1595		outside of SB and not annotated in dere
CG18518	2L:1596		not annotated in Drosophila subgenus
CG31822	2L:1597		outside of SB and not annotated in dana, dpse, dwil, dmoj
CG7653	2L:1600		not annotated in Drosophila subgenus
CG31824	2L:1601		outside of SB and not annotated in dmoj
CG18096	2L:1602		not annotated in Drosophila subgenus
CG31735	2L:1603		outside of SB and not annotated in dvir
CG31823	2L:1604		outside of SB and not annotated in dvir, dgri
CG13244	2L:1606	1026	not annotated in Drosophila subgenus
CG31819	2L:1616	1029	not annotated in Drosophila subgenus
CG17329	2L:1623	1033	not annotated in Drosophila subgenus
CG4440	2L:1633		not annotated in Drosophila subgenus
CG31817	2L:1634		outside of SB and not annotated in dmoj, dgri
CG31818	2L:1635		outside of SB and not annotated in dmoj, dgri
CG31737	2L:1636		not annotated in Drosophila subgenus
CG4580	2L:1644		not annotated in Drosophila subgenus
CG4694	2L:1654		not annotated in Drosophila subgenus
CG31807	2L:1655	1039	not annotated in Drosophila subgenus
CG33552	2L:1655	1039	not annotated in Drosophila subgenus
CG31782	2L:1655	1039	not annotated in Drosophila subgenus
CG17904	2L:1658		outside of SB and not assembled in dwil
CG11397	2L:1658		outside of SB and not assembled in dwil
CG33312	2L:1669	1043	not annotated in Drosophila subgenus
CG31810	2L:1674	1045	not annotated in Drosophila subgenus
CG31781	2L:1677		not annotated in Drosophila subgenus
CG31805	2L:1682	1048	not annotated in Drosophila subgenus
CG12288	2L:1683	1048	more complex explanation
CG6291	2L:1685	1048	not annotated in Drosophila subgenus
CG15136	2L:1689		not annotated in Drosophila subgenus
CG12620	2L:1690		not annotated in Drosophila subgenus
CG31747	2L:1693	1050	not annotated in Drosophila subgenus
CG31744	2L:1694	1050	not annotated in Drosophila subgenus
CG31748	2L:1695	1050	not annotated in Drosophila subgenus
CG31750	2L:1696	1050	not annotated in Drosophila subgenus
CG31745	2L:1697	1050	not annotated in Drosophila subgenus
CG31804	2L:1699		not annotated in Drosophila subgenus
CG5043	2L:1703		more complex explanation
CG33928	2L:1704		not annotated in Drosophila subgenus
CG6667	2L:1705		more complex explanation
CG5050	2L:1706		more complex explanation
CG6639	2L:1706		not annotated in Drosophila subgenus
CG18563	2L:1706		not annotated in Drosophila subgenus
CG15144	2L:1718	1058	not annotated in Drosophila subgenus
CG15145	2L:1719	1058	not annotated in Drosophila subgenus
CG7094	2L:1720	1058	more complex explanation
CG5681	2L:1728	1058	not annotated in Drosophila subgenus
CG31742	2L:1729	1058	not annotated in Drosophila subgenus
CG5693	2L:1730	1058	not annotated in Drosophila subgenus
CG15149	2L:1731	1058	not annotated in Drosophila subgenus
CG15150	2L:1733	1058	not annotated in Drosophila subgenus
CG5755	2L:1739		not annotated in Drosophila subgenus
CG17681	2L:1744		outside of SB and not annotated in dana
CG15155	2L:1745		outside of SB and not annotated in dana
CG31788	2L:1751		not annotated in Drosophila subgenus
CG31749	2L:1754	1066	not annotated in Drosophila subgenus
CG10174	2L:1758		not annotated in Drosophila subgenus
CG31789	2L:1768	1071	not annotated in Drosophila subgenus
CG31801	2L:1775		not annotated in Drosophila subgenus
CG15166	2L:1787	1077	not annotated in Drosophila subgenus
CG31752	2L:1797		outside of SB and not annotated in dpse, dgri
CG10603	2L:1800	1081	not annotated in Drosophila subgenus
CG15169	2L:1813	1084	not annotated in Drosophila subgenus
CG31792	2L:1815		not annotated in Drosophila subgenus
CG31793	2L:1816		outside of SB and not annotated in dwil
CG10652	2L:1817		outside of SB and not annotated in dana, dpse
CG15171	2L:1818		not annotated in Drosophila subgenus
CG15172	2L:1819		not annotated in Drosophila subgenus
CG17492	2L:1822	1086	more complex explanation
CG10700	2L:1833		not annotated in Drosophila subgenus
CG17568	2L:1844		not annotated in Drosophila subgenus
CG17567	2L:1845		not annotated in Drosophila subgenus
CG31797	2L:1849	1094	not annotated in Drosophila subgenus
CG31796	2L:1850	1094	not annotated in Drosophila subgenus
CG31798	2L:1859	1094	more complex explanation
CG33532	2L:1860	1094	not annotated in Drosophila subgenus
CG16771	2L:1861	1094	more complex explanation
CG31699	2L:1866	1096	not annotated in Drosophila subgenus
CG13079	2L:1886		not annotated in Drosophila subgenus
CG13962	2L:1905		not annotated in Drosophila subgenus
CG31691	2L:1907	1106	not annotated in Drosophila subgenus
CG33117	2L:1907	1106	not annotated in Drosophila subgenus
CG34051	2L:1910	1106	not annotated in Drosophila subgenus
CG10680	2L:1913	1106	not annotated in Drosophila subgenus
CG12508	2L:1916	1106	not annotated in Drosophila subgenus
CG10659	2L:1918		not annotated in Drosophila subgenus
CG10730	2L:1922	1108	not annotated in Drosophila subgenus
CG10651	2L:1929		not annotated in Drosophila subgenus
CG41071	2L:1930		not annotated in Drosophila subgenus
CG40463	2L:1930		not annotated in Drosophila subgenus
CG41073	2L:1931		not annotated in Drosophila subgenus
CG40169	2L:1932		outside of SB and not annotated in dmoj
CG40172	2L:1932		not annotated in Drosophila subgenus
CG40341	2L:1932		not annotated in Drosophila subgenus
CG17571	2L:1933		outside of SB and not annotated in dpse, dmoj
CG41072	2L:1934		not annotated in Drosophila subgenus
CG40174	2L:1934		not annotated in Drosophila subgenus
CG17570	2L:1935		outside of SB and not annotated in dpse, dmoj
CG40175	2L:1936		not annotated in Drosophila subgenus
CG40176	2L:1937		not annotated in Drosophila subgenus
CG11012	2L:1941	1114	not annotated in Drosophila subgenus
CG11019	2L:1947		not annotated in Drosophila subgenus
CG18858	2L:1951		not annotated in Drosophila subgenus
CG2508	2L:1952		not annotated in Drosophila subgenus
CG2493	2L:1952		outside of SB and not annotated in dgri
CG34007	2L:1953		not annotated in Drosophila subgenus
CG15476	2L:1954		not annotated in Drosophila subgenus
CG15477	2L:1955		not annotated in Drosophila subgenus
CG31677	2L:1956		not annotated in Drosophila subgenus
CG15475	2L:1957		not annotated in Drosophila subgenus
CG17472	2L:1958		not annotated in Drosophila subgenus
CG31680	2L:1959		not annotated in Drosophila subgenus
CG18810	2L:1963	1118	not annotated in Drosophila subgenus
CG1962	2L:1966	1119	more complex explanation
CG33321	2L:1980	1127	not annotated in Drosophila subgenus
CG33320	2L:1981	1127	not annotated in Drosophila subgenus
CG14405	2L:1982	1127	not annotated in Drosophila subgenus
CG9334	2L:1987	1128	not annotated in Drosophila subgenus
CG14402	2L:1989	1128	not annotated in Drosophila subgenus
CG14400	2L:1990	1128	not annotated in Drosophila subgenus
CG33317	2L:1996	1128	not annotated in Drosophila subgenus
CG9272	2L:1999		more complex explanation
CG9270	2L:2000		not annotated in Drosophila subgenus
CG9266	2L:2001		not annotated in Drosophila subgenus
CG9253	2L:2013		outside of SB and not assembled in dwil
CG9252	2L:2013		outside of SB and not assembled in dwil
CG1071	2L:2014		outside of SB and not assembled in dwil
CG9250	2L:2015		outside of SB and not assembled in dwil
CG9249	2L:2015		outside of SB and not assembled in dwil
CG9248	2L:2016		outside of SB and not assembled in dwil
CG9247	2L:2016		outside of SB and not assembled in dwil
CG9246	2L:2017		outside of SB and not assembled in dwil
CG9243	2L:2017		outside of SB and not assembled in dwil
CG9244	2L:2018		outside of SB and not assembled in dwil
CG31627	2L:2019		outside of SB and not assembled in dwil
CG9242	2L:2020		outside of SB and not assembled in dwil
CG9241	2L:2021		outside of SB and not assembled in dwil
CG14396	2L:2021		outside of SB and not assembled in dwil
CG31624	2L:2022		outside of SB and not annotated in dere, dyak and not assembled in dwil
CG31988	2L:2023		not annotated in Drosophila subgenus
CG2042	2L:2034	1137	not annotated in Drosophila subgenus
CG33801	2L:2039		not annotated in Drosophila subgenus
CG33910	2L:2040		not annotated in Drosophila subgenus
CG33909	2L:2041		not annotated in Drosophila subgenus
CG33803	2L:2042		not annotated in Drosophila subgenus
CG31617	2L:2043		not annotated in Drosophila subgenus
CG17949	2L:2044		not annotated in Drosophila subgenus
CG31618	2L:2045		not annotated in Drosophila subgenus
CG31611	2L:2046		not annotated in Drosophila subgenus
CG31613	2L:2047		not annotated in Drosophila subgenus
CG33804	2L:2048		not annotated in Drosophila subgenus
CG33908	2L:2049		not annotated in Drosophila subgenus
CG33907	2L:2050		not annotated in Drosophila subgenus
CG33806	2L:2051		not annotated in Drosophila subgenus
CG33807	2L:2052		not annotated in Drosophila subgenus
CG33906	2L:2053		not annotated in Drosophila subgenus
CG33808	2L:2054		not annotated in Drosophila subgenus
CG33905	2L:2055		not annotated in Drosophila subgenus
CG33809	2L:2056		not annotated in Drosophila subgenus
CG33810	2L:2057		not annotated in Drosophila subgenus
CG33904	2L:2058		not annotated in Drosophila subgenus
CG33903	2L:2059		not annotated in Drosophila subgenus
CG33812	2L:2060		not annotated in Drosophila subgenus
CG33813	2L:2061		not annotated in Drosophila subgenus
CG33902	2L:2062		not annotated in Drosophila subgenus
CG33814	2L:2063		not annotated in Drosophila subgenus
CG33901	2L:2064		not annotated in Drosophila subgenus
CG33815	2L:2065		not annotated in Drosophila subgenus
CG33816	2L:2066		not annotated in Drosophila subgenus
CG33900	2L:2067		not annotated in Drosophila subgenus
CG33817	2L:2068		not annotated in Drosophila subgenus
CG33899	2L:2069		not annotated in Drosophila subgenus
CG33818	2L:2070		not annotated in Drosophila subgenus
CG33819	2L:2071		not annotated in Drosophila subgenus
CG33898	2L:2072		not annotated in Drosophila subgenus
CG33820	2L:2073		not annotated in Drosophila subgenus
CG33897	2L:2074		not annotated in Drosophila subgenus
CG33821	2L:2075		not annotated in Drosophila subgenus
CG33822	2L:2076		not annotated in Drosophila subgenus
CG33896	2L:2077		not annotated in Drosophila subgenus
CG33823	2L:2078		not annotated in Drosophila subgenus
CG33895	2L:2079		not annotated in Drosophila subgenus
CG33824	2L:2080		not annotated in Drosophila subgenus
CG33825	2L:2081		not annotated in Drosophila subgenus
CG33894	2L:2082		not annotated in Drosophila subgenus
CG33826	2L:2083		not annotated in Drosophila subgenus
CG33893	2L:2084		not annotated in Drosophila subgenus
CG33827	2L:2085		not annotated in Drosophila subgenus
CG33828	2L:2086		not annotated in Drosophila subgenus
CG33892	2L:2087		not annotated in Drosophila subgenus
CG33829	2L:2088		not annotated in Drosophila subgenus
CG33891	2L:2089		not annotated in Drosophila subgenus
CG33830	2L:2090		not annotated in Drosophila subgenus
CG33831	2L:2091		not annotated in Drosophila subgenus
CG33890	2L:2092		not annotated in Drosophila subgenus
CG33832	2L:2093		not annotated in Drosophila subgenus
CG33889	2L:2094		not annotated in Drosophila subgenus
CG33833	2L:2095		not annotated in Drosophila subgenus
CG33834	2L:2096		not annotated in Drosophila subgenus
CG33888	2L:2097		not annotated in Drosophila subgenus
CG33835	2L:2098		not annotated in Drosophila subgenus
CG33887	2L:2099		not annotated in Drosophila subgenus
CG33836	2L:2100		not annotated in Drosophila subgenus
CG33837	2L:2101		not annotated in Drosophila subgenus
CG33886	2L:2102		not annotated in Drosophila subgenus
CG33838	2L:2103		not annotated in Drosophila subgenus
CG33885	2L:2104		not annotated in Drosophila subgenus
CG33839	2L:2105		not annotated in Drosophila subgenus
CG33840	2L:2106		not annotated in Drosophila subgenus
CG33884	2L:2107		not annotated in Drosophila subgenus
CG33841	2L:2108		not annotated in Drosophila subgenus
CG33883	2L:2109		not annotated in Drosophila subgenus
CG33842	2L:2110		not annotated in Drosophila subgenus
CG33843	2L:2111		not annotated in Drosophila subgenus
CG33882	2L:2112		not annotated in Drosophila subgenus
CG33844	2L:2113		not annotated in Drosophila subgenus
CG33881	2L:2114		not annotated in Drosophila subgenus
CG33845	2L:2115		not annotated in Drosophila subgenus
CG33846	2L:2116		not annotated in Drosophila subgenus
CG33880	2L:2117		not annotated in Drosophila subgenus
CG33847	2L:2118		not annotated in Drosophila subgenus
CG33879	2L:2119		not annotated in Drosophila subgenus
CG33848	2L:2120		not annotated in Drosophila subgenus
CG33849	2L:2121		not annotated in Drosophila subgenus
CG33878	2L:2122		not annotated in Drosophila subgenus
CG33850	2L:2123		not annotated in Drosophila subgenus
CG33877	2L:2124		not annotated in Drosophila subgenus
CG33851	2L:2125		not annotated in Drosophila subgenus
CG33852	2L:2126		not annotated in Drosophila subgenus
CG33876	2L:2127		not annotated in Drosophila subgenus
CG33853	2L:2128		not annotated in Drosophila subgenus
CG33875	2L:2129		not annotated in Drosophila subgenus
CG33854	2L:2130		not annotated in Drosophila subgenus
CG33855	2L:2131		not annotated in Drosophila subgenus
CG33874	2L:2132		not annotated in Drosophila subgenus
CG33856	2L:2133		not annotated in Drosophila subgenus
CG33873	2L:2134		not annotated in Drosophila subgenus
CG33857	2L:2135		not annotated in Drosophila subgenus
CG33858	2L:2136		not annotated in Drosophila subgenus
CG33872	2L:2137		not annotated in Drosophila subgenus
CG33859	2L:2138		not annotated in Drosophila subgenus
CG33871	2L:2139		not annotated in Drosophila subgenus
CG33860	2L:2140		not annotated in Drosophila subgenus
CG33861	2L:2141		not annotated in Drosophila subgenus
CG33870	2L:2142		not annotated in Drosophila subgenus
CG33862	2L:2143		not annotated in Drosophila subgenus
CG33869	2L:2144		not annotated in Drosophila subgenus
CG33863	2L:2145		not annotated in Drosophila subgenus
CG33864	2L:2146		not annotated in Drosophila subgenus
CG33868	2L:2147		not annotated in Drosophila subgenus
CG33865	2L:2148		not annotated in Drosophila subgenus
CG33866	2L:2149		not annotated in Drosophila subgenus
CG11630	2L:2161	1143	not annotated in Drosophila subgenus
CG31600	2L:2166	1143	not annotated in Drosophila subgenus
CG2528	2L:2168	1143	not annotated in Drosophila subgenus
CG31693	2L:2169	1143	not annotated in Drosophila subgenus
CG31700	2L:2172	1143	not annotated in Drosophila subgenus
CG31703	2L:2175		not annotated in Drosophila subgenus
CG10834	2L:2177		not annotated in Drosophila subgenus
CG3635	2L:2184		not annotated in Drosophila subgenus
CG3262	2L:2187		not annotated in Drosophila subgenus
CG12775	2L:2188		outside of SB and not annotated in dana
CG3278	2L:2189		outside of SB and not annotated in dana
CG16937	2L:2190		not annotated in Drosophila subgenus
CG17018	2L:2191		outside of SB and not annotated in dyak and not assembled in dana
CG33492	2R:0001		not annotated in Drosophila subgenus
CG2981	2R:0002		not annotated in Drosophila subgenus
CG3107	2R:0003		outside of SB and not annotated in dyak, dgri
CG2944	2R:0004		outside of SB and not annotated in dyak, dpse and not assembled in dana
CG3136	2R:0005		outside of SB and not annotated in dyak, dpse and not assembled in dana
CG33554	2R:0006		not annotated in Drosophila subgenus
CG2682	2R:0007		outside of SB and not annotated in dyak
CG10392	2R:0008		outside of SB and not annotated in dyak, dpse, dgri and not assembled in dana
CG10465	2R:0009		outside of SB and not annotated in dyak, dgri and not assembled in dana
CG10395	2R:0010		outside of SB and not annotated in dyak, dgri and not assembled in dana
CG30441	2R:0010		outside of SB and not annotated in dyak, dgri
CG10396	2R:0011		not annotated in Drosophila subgenus
CG33347	2R:0012		not annotated in Drosophila subgenus
CG10417	2R:0013		outside of SB and not annotated in dyak, dpse, dgri and not assembled in dana
CG30437	2R:0014		outside of SB and not annotated in dyak, dpse, dgri and not assembled in dana
CG32838	2R:0015		outside of SB and not annotated in dyak, dpse, dgri and not assembled in dana
CG30440	2R:0016		outside of SB and not annotated in dyak, dmoj, dgri
CG30438	2R:0017		outside of SB and not annotated in dyak
CG12408	2R:0017		not annotated in Drosophila subgenus
CG17510	2R:0018		outside of SB and not annotated in dyak, dpse and not assembled in dana
CG17508	2R:0019		outside of SB and not annotated in dyak and not assembled in dana
CG11665	2R:0020		outside of SB and not assembled in dana
CG1344	2R:0021		outside of SB and not assembled in dana
CG8426	2R:0022		outside of SB and not assembled in dana
CG1294	2R:0023		not annotated in Drosophila subgenus
CG8245	2R:0024		outside of SB and not assembled in dana
CG1298	2R:0025		outside of SB and not annotated in dwil
CG11066	2R:0026		outside of SB and not annotated in dmoj
CG17250	2R:0034	1155	more complex explanation
CG14468	2R:0035	1155	more complex explanation
CG30436	2R:0039	1155	not annotated in Drosophila subgenus
CG12551	2R:0040	1155	not annotated in Drosophila subgenus
CG7882	2R:0042	1155	more complex explanation
CG7863	2R:0048		not annotated in Drosophila subgenus
CG8345	2R:0059	1160	more complex explanation
CG30432	2R:0063		not annotated in Drosophila subgenus
CG8335	2R:0064		not annotated in Drosophila subgenus
CG8330	2R:0068	1163	not annotated in Drosophila subgenus
CG15233	2R:0071	1164	not annotated in Drosophila subgenus
CG15234	2R:0072	1164	not annotated in Drosophila subgenus
CG33919	2R:0074	1164	not annotated in Drosophila subgenus
CG9445	2R:0108	1175	not annotated in Drosophila subgenus
CG9454	2R:0112	1176	not annotated in Drosophila subgenus
CG9455	2R:0113	1176	not annotated in Drosophila subgenus
CG9456	2R:0113	1176	not annotated in Drosophila subgenus
CG33348	2R:0117	1177	not annotated in Drosophila subgenus
CG18816	2R:0121	1178	not annotated in Drosophila subgenus
CG30160	2R:0122		outside of SB and not annotated in dere, dyak
CG12842	2R:0130	1181	not annotated in Drosophila subgenus
CG4485	2R:0142	1181	not annotated in Drosophila subgenus
CG11060	2R:0148	1181	more complex explanation
CG33140	2R:0149	1181	more complex explanation
CG30385	2R:0150	1181	not annotated in Drosophila subgenus
CG11112	2R:0164	1185	not annotated in Drosophila subgenus
CG11113	2R:0164	1185	not annotated in Drosophila subgenus
CG1701	2R:0165		not annotated in Drosophila subgenus
CG2140	2R:0185	1194	more complex explanation
CG1598	2R:0185	1194	more complex explanation
CG1339	2R:0195	1197	not annotated in Drosophila subgenus
CG1941	2R:0205		not annotated in Drosophila subgenus
CG1942	2R:0206		not annotated in Drosophila subgenus
CG12825	2R:0212		not annotated in Drosophila subgenus
CG12824	2R:0213		not annotated in Drosophila subgenus
CG12055	2R:0214		not annotated in Drosophila subgenus
CG30383	2R:0220		outside of SB and not annotated in dpse, dwil, dgri
CG17853	2R:0230	1207	not annotated in Drosophila subgenus
CG2916	2R:0241	1211	not annotated in Drosophila subgenus
CG11196	2R:0246	1212	not annotated in Drosophila subgenus
CG8721	2R:0249	1212	not annotated in Drosophila subgenus
CG17977	2R:0254	1214	not annotated in Drosophila subgenus
CG17976	2R:0260	1215	not annotated in Drosophila subgenus
CG18316	2R:0264	1216	not annotated in Drosophila subgenus
CG30374	2R:0272		not annotated in Drosophila subgenus
CG8708	2R:0273		not annotated in Drosophila subgenus
CG14756	2R:0279		not annotated in Drosophila subgenus
CG30369	2R:0284		not annotated in Drosophila subgenus
CG14759	2R:0285		not annotated in Drosophila subgenus
CG12126	2R:0287	1225	not annotated in Drosophila subgenus
CG30358	2R:0291	1225	not annotated in Drosophila subgenus
CG30365	2R:0293	1225	not annotated in Drosophila subgenus
CG18449	2R:0298	1225	not annotated in Drosophila subgenus
CG8701	2R:0300	1225	more complex explanation
CG8690	2R:0316	1229	not annotated in Drosophila subgenus
CG14754	2R:0318	1229	not annotated in Drosophila subgenus
CG12780	2R:0319	1229	not annotated in Drosophila subgenus
CG8687	2R:0320	1229	not annotated in Drosophila subgenus
CG8734	2R:0330		outside of SB and not annotated in dana
CG30353	2R:0333	1233	not annotated in Drosophila subgenus
CG30354	2R:0334	1233	more complex explanation
CG30355	2R:0334	1233	not annotated in Drosophila subgenus
CG14744	2R:0340	1235	not annotated in Drosophila subgenus
CG14746	2R:0341	1235	not annotated in Drosophila subgenus
CG30356	2R:0346	1237	not annotated in Drosophila subgenus
CG8746	2R:0348	1237	not annotated in Drosophila subgenus
CG13751	2R:0354	1239	not annotated in Drosophila subgenus
CG11778	2R:0387	1249	not annotated in Drosophila subgenus
CG8781	2R:0394	1252	more complex explanation
CG8788	2R:0399		not annotated in Drosophila subgenus
CG30345	2R:0403	1255	not annotated in Drosophila subgenus
CG13740	2R:0413	1260	not annotated in Drosophila subgenus
CG2063	2R:0417		outside of SB and not assembled in dana
CG1968	2R:0418		outside of SB and not assembled in dana
CG2072	2R:0418		more complex explanation
CG1978	2R:0421	1262	not annotated in Drosophila subgenus
CG12158	2R:0422	1262	not annotated in Drosophila subgenus
CG8799	2R:0424	1262	more complex explanation
CG8800	2R:0425	1262	more complex explanation
CG33774	2R:0427	1263	not annotated in Drosophila subgenus
CG13955	2R:0430		outside of SB and not annotated in dmoj, dgri
CG8806	2R:0431		not annotated in Drosophila subgenus
CG30005	2R:0463	1268	not annotated in Drosophila subgenus
CG30002	2R:0466	1269	not annotated in Drosophila subgenus
CG1773	2R:0467	1269	not annotated in Drosophila subgenus
CG10459	2R:0467	1269	more complex explanation
CG33800	2R:0471	1269	not annotated in Drosophila subgenus
CG34033	2R:0477		outside of SB and not annotated in dmoj, dgri
CG30001	2R:0478		outside of SB and not annotated in dmoj
CG1663	2R:0481		not annotated in Drosophila subgenus
CG18446	2R:0489		not annotated in Drosophila subgenus
CG12744	2R:0490		not annotated in Drosophila subgenus
CG1472	2R:0491		not annotated in Drosophila subgenus
CG1513	2R:0492		not annotated in Drosophila subgenus
CG12923	2R:0492		not annotated in Drosophila subgenus
CG30008	2R:0492		not annotated in Drosophila subgenus
CG30007	2R:0493		outside of SB and not annotated in dpse, dgri
CG12133	2R:0499		outside of SB and not annotated in dpse, dwil, dmoj
CG18445	2R:0507		outside of SB and not annotated in dmoj
CG2292	2R:0510	1283	not annotated in Drosophila subgenus
CG12921	2R:0511	1284	more complex explanation
CG1380	2R:0514		not annotated in Drosophila subgenus
CG2275	2R:0516	1288	more complex explanation
CG12917	2R:0522	1292	more complex explanation
CG12912	2R:0527	1292	not annotated in Drosophila subgenus
CG12907	2R:0538	1293	not annotated in Drosophila subgenus
CG12902	2R:0539	1293	not annotated in Drosophila subgenus
CG12906	2R:0541	1293	not annotated in Drosophila subgenus
CG33477	2R:0545	1293	not annotated in Drosophila subgenus
CG33476	2R:0546	1293	not annotated in Drosophila subgenus
CG33475	2R:0547	1293	not annotated in Drosophila subgenus
CG11765	2R:0549	1293	more complex explanation
CG11825	2R:0550	1293	not annotated in Drosophila subgenus
CG33474	2R:0551	1293	not annotated in Drosophila subgenus
CG12405	2R:0552	1293	more complex explanation
CG30320	2R:0559		not annotated in Drosophila subgenus
CG30018	2R:0574	1299	not annotated in Drosophila subgenus
CG12324	2R:0582	1302	not annotated in Drosophila subgenus
CG30017	2R:0586	1304	not annotated in Drosophila subgenus
CG18004	2R:0590		outside of SB and not annotated in dgri
CG12346	2R:0591	1307	not annotated in Drosophila subgenus
CG11979	2R:0593		outside of SB and not annotated in dpse
CG13235	2R:0597	1309	not annotated in Drosophila subgenus
CG30490	2R:0598		not annotated in Drosophila subgenus
CG30489	2R:0599		not annotated in Drosophila subgenus
CG33503	2R:0600		not annotated in Drosophila subgenus
CG7737	2R:0608	1311	not annotated in Drosophila subgenus
CG30029	2R:0617	1312	not annotated in Drosophila subgenus
CG7738	2R:0618	1312	not annotated in Drosophila subgenus
CG13223	2R:0622	1312	not annotated in Drosophila subgenus
CG30027	2R:0627	1313	not annotated in Drosophila subgenus
CG30033	2R:0633	1313	not annotated in Drosophila subgenus
CG12350	2R:0641		not annotated in Drosophila subgenus
CG12388	2R:0642		not annotated in Drosophila subgenus
CG12387	2R:0643		not annotated in Drosophila subgenus
CG12386	2R:0644		not annotated in Drosophila subgenus
CG12385	2R:0645		not annotated in Drosophila subgenus
CG18444	2R:0646		not annotated in Drosophila subgenus
CG18681	2R:0647		not annotated in Drosophila subgenus
CG18211	2R:0648		not annotated in Drosophila subgenus
CG30028	2R:0649		not annotated in Drosophila subgenus
CG30031	2R:0650		not annotated in Drosophila subgenus
CG30025	2R:0651		not annotated in Drosophila subgenus
CG12351	2R:0652		not annotated in Drosophila subgenus
CG13202	2R:0652		not annotated in Drosophila subgenus
CG7754	2R:0653		not annotated in Drosophila subgenus
CG12384	2R:0654		not annotated in Drosophila subgenus
CG30026	2R:0666		not annotated in Drosophila subgenus
CG34054	2R:0667		not annotated in Drosophila subgenus
CG7763	2R:0668	1318	not annotated in Drosophila subgenus
CG30034	2R:0673	1319	not annotated in Drosophila subgenus
CG8234	2R:0679	1321	not annotated in Drosophila subgenus
CG12444	2R:0686	1323	not annotated in Drosophila subgenus
CG30036	2R:0703	1329	not annotated in Drosophila subgenus
CG30037	2R:0704	1329	not annotated in Drosophila subgenus
CG30039	2R:0717	1334	not annotated in Drosophila subgenus
CG18343	2R:0722		not annotated in Drosophila subgenus
CG8860	2R:0731		not annotated in Drosophila subgenus
CG17967	2R:0738	1339	not annotated in Drosophila subgenus
CG8856	2R:0739	1339	not annotated in Drosophila subgenus
CG13171	2R:0740	1339	not annotated in Drosophila subgenus
CG13169	2R:0743	1339	not annotated in Drosophila subgenus
CG13167	2R:0745	1339	not annotated in Drosophila subgenus
CG13162	2R:0759		outside of SB and not annotated in dwil, dgri
CG30047	2R:0760		outside of SB and not annotated in dwil
CG30049	2R:0761		outside of SB and not annotated in dwil
CG30043	2R:0762		outside of SB and not annotated in dwil
CG33013	2R:0763		outside of SB and not annotated in dwil
CG33012	2R:0764		outside of SB and not annotated in dwil
CG13159	2R:0766	1344	not annotated in Drosophila subgenus
CG30048	2R:0774	1344	not annotated in Drosophila subgenus
CG8525	2R:0784	1346	more complex explanation
CG13154	2R:0784	1346	more complex explanation
CG30334	2R:0787	1349	not annotated in Drosophila subgenus
CG8821	2R:0794		not annotated in Drosophila subgenus
CG8569	2R:0797		not annotated in Drosophila subgenus
CG30055	2R:0802	1355	not annotated in Drosophila subgenus
CG17760	2R:0806	1356	not annotated in Drosophila subgenus
CG18356	2R:0823	1362	not annotated in Drosophila subgenus
CG17580	2R:0830		not annotated in Drosophila subgenus
CG30486	2R:0835	1365	not annotated in Drosophila subgenus
CG3814	2R:0839	1366	not annotated in Drosophila subgenus
CG30487	2R:0848	1367	not annotated in Drosophila subgenus
CG33798	2R:0852	1368	not annotated in Drosophila subgenus
CG13325	2R:0857	1369	not annotated in Drosophila subgenus
CG15870	2R:0864	1372	not annotated in Drosophila subgenus
CG4016	2R:0866		outside of SB and not annotated in dmoj, dgri
CG33138	2R:0867		outside of SB and not assembled in dgri
CG33137	2R:0868		not annotated in Drosophila subgenus
CG17724	2R:0869		outside of SB and not assembled in dgri
CG32904	2R:0869		outside of SB and not assembled in dgri
CG33182	2R:0869		outside of SB and not assembled in dgri
CG4062	2R:0870		outside of SB and not assembled in dgri
CG4088	2R:0871		outside of SB and not assembled in dgri
CG4616	2R:0872		outside of SB and not assembled in dgri
CG30058	2R:0872		not annotated in Drosophila subgenus
CG12251	2R:0873		outside of SB and not assembled in dgri
CG4627	2R:0874		outside of SB and not assembled in dgri
CG4630	2R:0875		outside of SB and not assembled in dgri
CG12765	2R:0879		more complex explanation
CG4670	2R:0880		more complex explanation
CG4676	2R:0881		more complex explanation
CG4679	2R:0882		more complex explanation
CG4716	2R:0887	1376	not annotated in Drosophila subgenus
CG10799	2R:0888	1376	not annotated in Drosophila subgenus
CG18279	2R:0899		not annotated in Drosophila subgenus
CG18278	2R:0899		not annotated in Drosophila subgenus
CG33470	2R:0900		not annotated in Drosophila subgenus
CG30059	2R:0900		not annotated in Drosophila subgenus
CG30065	2R:0902	1380	not annotated in Drosophila subgenus
CG13334	2R:0919		not annotated in Drosophila subgenus
CG6209	2R:0925	1389	not annotated in Drosophila subgenus
CG30484	2R:0937	1389	not annotated in Drosophila subgenus
CG30485	2R:0938	1389	not annotated in Drosophila subgenus
CG6553	2R:0939		not annotated in Drosophila subgenus
CG6704	2R:0949		not annotated in Drosophila subgenus
CG30482	2R:0954		not annotated in Drosophila subgenus
CG8257	2R:0959	1400	more complex explanation
CG8323	2R:0962		not annotated in Drosophila subgenus
CG18327	2R:0963		not annotated in Drosophila subgenus
CG10102	2R:0990		not annotated in Drosophila subgenus
CG13941	2R:0990		not annotated in Drosophila subgenus
CG30075	2R:0997	1410	not annotated in Drosophila subgenus
CG17389	2R:1005	1412	not annotated in Drosophila subgenus
CG10131	2R:1021		not annotated in Drosophila subgenus
CG12862	2R:1022		not annotated in Drosophila subgenus
CG30477	2R:1023		not annotated in Drosophila subgenus
CG10139	2R:1024		not annotated in Drosophila subgenus
CG10143	2R:1025		not annotated in Drosophila subgenus
CG12861	2R:1026		not annotated in Drosophila subgenus
CG12860	2R:1027		not annotated in Drosophila subgenus
CG12866	2R:1028		not annotated in Drosophila subgenus
CG10145	2R:1029		not annotated in Drosophila subgenus
CG30479	2R:1029		not annotated in Drosophila subgenus
CG30480	2R:1029		not annotated in Drosophila subgenus
CG12865	2R:1030		not annotated in Drosophila subgenus
CG10816	2R:1032	1423	not annotated in Drosophila subgenus
CG12854	2R:1040		not annotated in Drosophila subgenus
CG10246	2R:1056	1428	not annotated in Drosophila subgenus
CG12853	2R:1063	1431	not annotated in Drosophila subgenus
CG30473	2R:1069	1435	not annotated in Drosophila subgenus
CG33467	2R:1070	1435	not annotated in Drosophila subgenus
CG8089	2R:1072		not annotated in Drosophila subgenus
CG30081	2R:1077	1436	not annotated in Drosophila subgenus
CG16827	2R:1082	1439	not annotated in Drosophila subgenus
CG8157	2R:1090	1440	not annotated in Drosophila subgenus
CG8160	2R:1091	1440	not annotated in Drosophila subgenus
CG8175	2R:1096	1442	not annotated in Drosophila subgenus
CG30472	2R:1098	1442	not annotated in Drosophila subgenus
CG12960	2R:1103	1442	not annotated in Drosophila subgenus
CG8200	2R:1115		more complex explanation
CG8203	2R:1116		more complex explanation
CG30466	2R:1117		more complex explanation
CG30465	2R:1119	1446	not annotated in Drosophila subgenus
CG8210	2R:1122	1446	not annotated in Drosophila subgenus
CG30091	2R:1123	1446	not annotated in Drosophila subgenus
CG30090	2R:1125		not annotated in Drosophila subgenus
CG30088	2R:1126		not annotated in Drosophila subgenus
CG30087	2R:1127		not annotated in Drosophila subgenus
CG33460	2R:1128		not annotated in Drosophila subgenus
CG33461	2R:1129		not annotated in Drosophila subgenus
CG33462	2R:1130		not annotated in Drosophila subgenus
CG30080	2R:1131		not annotated in Drosophila subgenus
CG30083	2R:1132		not annotated in Drosophila subgenus
CG30321	2R:1134	1447	not annotated in Drosophila subgenus
CG33465	2R:1135		not annotated in Drosophila subgenus
CG8246	2R:1136		outside of SB and not annotated in dmoj
CG8249	2R:1137		outside of SB and not annotated in dmoj
CG8253	2R:1138		outside of SB and not annotated in dmoj
CG33463	2R:1143	1450	not annotated in Drosophila subgenus
CG8320	2R:1154	1455	more complex explanation
CG8322	2R:1154	1455	more complex explanation
CG8395	2R:1156		outside of SB and not annotated in dwil
CG8397	2R:1156		outside of SB and not annotated in dwil
CG8430	2R:1170		outside of SB and not annotated in dana
CG10734	2R:1173		not annotated in Drosophila subgenus
CG33017	2R:1194		outside of SB and not annotated in dgri
CG9068	2R:1198	1472	not annotated in Drosophila subgenus
CG15710	2R:1213		not annotated in Drosophila subgenus
CG30098	2R:1214		not annotated in Drosophila subgenus
CG15711	2R:1216	1477	not annotated in Drosophila subgenus
CG4398	2R:1218		not annotated in Drosophila subgenus
CG33550	2R:1222		not annotated in Drosophila subgenus
CG33524	2R:1223		not annotated in Drosophila subgenus
CG33458	2R:1225	1479	not annotated in Drosophila subgenus
CG33459	2R:1226	1479	not annotated in Drosophila subgenus
CG4918	2R:1237		outside of SB and not annotated in dpse, dvir
CG8626	2R:1250	1486	not annotated in Drosophila subgenus
CG15616	2R:1251	1486	not annotated in Drosophila subgenus
CG8622	2R:1252	1486	not annotated in Drosophila subgenus
CG33530	2R:1253	1486	not annotated in Drosophila subgenus
CG5348	2R:1255		not annotated in Drosophila subgenus
CG5550	2R:1263		outside of SB and not annotated in dpse
CG6301	2R:1264		outside of SB and not annotated in dpse
CG8652	2R:1265		not annotated in Drosophila subgenus
CG5859	2R:1266		outside of SB and not annotated in dpse
CG8648	2R:1266		outside of SB and not annotated in dpse
CG5935	2R:1267		outside of SB and not annotated in dpse
CG8912	2R:1268		outside of SB and not annotated in dpse
CG9013	2R:1277	1491	not annotated in Drosophila subgenus
CG30461	2R:1283	1492	not annotated in Drosophila subgenus
CG18730	2R:1303	1501	not annotated in Drosophila subgenus
CG10956	2R:1304	1501	not annotated in Drosophila subgenus
CG17876	2R:1305	1501	not annotated in Drosophila subgenus
CG11400	2R:1308	1501	not annotated in Drosophila subgenus
CG15917	2R:1309	1501	not annotated in Drosophila subgenus
CG17287	2R:1312	1501	not annotated in Drosophila subgenus
CG10950	2R:1316	1501	not annotated in Drosophila subgenus
CG18469	2R:1317	1501	not annotated in Drosophila subgenus
CG12699	2R:1318	1501	not annotated in Drosophila subgenus
CG6536	2R:1329	1505	not annotated in Drosophila subgenus
CG6530	2R:1330	1505	not annotated in Drosophila subgenus
CG10764	2R:1331	1505	not annotated in Drosophila subgenus
CG14479	2R:1340	1507	not annotated in Drosophila subgenus
CG18186	2R:1360	1516	not annotated in Drosophila subgenus
CG30108	2R:1363		not annotated in Drosophila subgenus
CG10934	2R:1371	1521	not annotated in Drosophila subgenus
CG12298	2R:1378	1526	more complex explanation
CG6385	2R:1381	1527	more complex explanation
CG30111	2R:1391	1528	not annotated in Drosophila subgenus
CG30323	2R:1392	1528	not annotated in Drosophila subgenus
CG30110	2R:1395	1530	not annotated in Drosophila subgenus
CG10930	2R:1396		outside of SB and not annotated in dpse, dgri
CG14494	2R:1398	1531	not annotated in Drosophila subgenus
CG14500	2R:1431	1544	not annotated in Drosophila subgenus
CG30114	2R:1432	1544	not annotated in Drosophila subgenus
CG18540	2R:1442	1544	not annotated in Drosophila subgenus
CG14505	2R:1443	1544	not annotated in Drosophila subgenus
CG14503	2R:1444	1544	not annotated in Drosophila subgenus
CG18107	2R:1447	1544	not annotated in Drosophila subgenus
CG16844	2R:1449	1544	not annotated in Drosophila subgenus
CG15065	2R:1451	1544	not annotated in Drosophila subgenus
CG15068	2R:1452	1544	not annotated in Drosophila subgenus
CG5164	2R:1455	1544	not annotated in Drosophila subgenus
CG17523	2R:1456	1544	not annotated in Drosophila subgenus
CG17524	2R:1457	1544	not annotated in Drosophila subgenus
CG17525	2R:1458	1544	not annotated in Drosophila subgenus
CG17527	2R:1459	1544	not annotated in Drosophila subgenus
CG30119	2R:1476	1547	not annotated in Drosophila subgenus
CG30332	2R:1479		not annotated in Drosophila subgenus
CG5345	2R:1484		outside of SB and not annotated in dpse, dwil
CG5482	2R:1485		outside of SB and not annotated in dgri
CG33724	2R:1487		not annotated in Drosophila subgenus
CG30121	2R:1496	1556	not annotated in Drosophila subgenus
CG15107	2R:1522	1560	not annotated in Drosophila subgenus
CG15115	2R:1528	1560	not annotated in Drosophila subgenus
CG15116	2R:1529	1560	not annotated in Drosophila subgenus
CG30125	2R:1531	1560	not annotated in Drosophila subgenus
CG15117	2R:1532		outside of SB and not annotated in dgri
CG33454	2R:1541	1564	not annotated in Drosophila subgenus
CG33453	2R:1542	1564	not annotated in Drosophila subgenus
CG10476	2R:1546	1564	not annotated in Drosophila subgenus
CG10474	2R:1547	1564	not annotated in Drosophila subgenus
CG18606	2R:1548	1564	not annotated in Drosophila subgenus
CG18607	2R:1549	1564	not annotated in Drosophila subgenus
CG7461	2R:1553		outside of SB and not annotated in dpse, dwil
CG7726	2R:1571		outside of SB and not annotated in dpse
CG7735	2R:1572		outside of SB and not annotated in dpse
CG9291	2R:1573		outside of SB and not annotated in dpse
CG9277	2R:1574		outside of SB and not annotated in dpse
CG7744	2R:1575		outside of SB and not annotated in dgri
CG30130	2R:1586	1575	not annotated in Drosophila subgenus
CG11018	2R:1592	1579	not annotated in Drosophila subgenus
CG15127	2R:1595	1579	more complex explanation
CG30450	2R:1603		not annotated in Drosophila subgenus
CG30448	2R:1609	1581	not annotated in Drosophila subgenus
CG30447	2R:1611	1581	not annotated in Drosophila subgenus
CG10822	2R:1612	1581	not annotated in Drosophila subgenus
CG16898	2R:1614	1581	not annotated in Drosophila subgenus
CG18416	2R:1617	1581	not annotated in Drosophila subgenus
CG11209	2R:1622		outside of SB and not annotated in dwil, dgri
CG16741	2R:1642		not annotated in Drosophila subgenus
CG30142	2R:1647	1594	not annotated in Drosophila subgenus
CG30141	2R:1648	1594	not annotated in Drosophila subgenus
CG30151	2R:1651		outside of SB and not annotated in dpse
CG13428	2R:1656	1596	not annotated in Drosophila subgenus
CG30145	2R:1658	1596	not annotated in Drosophila subgenus
CG30150	2R:1659	1596	not annotated in Drosophila subgenus
CG30153	2R:1665	1599	not annotated in Drosophila subgenus
CG15231	2R:1691	1605	not annotated in Drosophila subgenus
CG10067	2R:1698	1605	not annotated in Drosophila subgenus
CG33704	2R:1699	1605	not annotated in Drosophila subgenus
CG3221	2R:1706	1608	more complex explanation
CG4038	2R:1725	1615	more complex explanation
CG30393	2R:1744	1618	not annotated in Drosophila subgenus
CG10505	2R:1748		outside of SB and not annotated in dvir, dmoj
CG30392	2R:1749		outside of SB and not annotated in dvir, dmoj
CG10071	2R:1751	1620	more complex explanation
CG9696	2R:1754	1623	more complex explanation
CG30282	2R:1765	1626	not annotated in Drosophila subgenus
CG30288	2R:1768		not annotated in Drosophila subgenus
CG30289	2R:1769		not annotated in Drosophila subgenus
CG30286	2R:1770		not annotated in Drosophila subgenus
CG30287	2R:1771		not annotated in Drosophila subgenus
CG33226	2R:1772		not annotated in Drosophila subgenus
CG30283	2R:1773		not annotated in Drosophila subgenus
CG33225	2R:1777	1627	not annotated in Drosophila subgenus
CG15675	2R:1789	1630	not annotated in Drosophila subgenus
CG15676	2R:1791		not annotated in Drosophila subgenus
CG30285	2R:1794		outside of SB and not annotated in dmoj
CG30395	2R:1803		not annotated in Drosophila subgenus
CG4021	2R:1804		not annotated in Drosophila subgenus
CG9284	2R:1808	1636	not annotated in Drosophila subgenus
CG4372	2R:1813	1636	not annotated in Drosophila subgenus
CG13494	2R:1820		not annotated in Drosophila subgenus
CG34029	2R:1823		not annotated in Drosophila subgenus
CG30396	2R:1827	1642	not annotated in Drosophila subgenus
CG10138	2R:1832		not annotated in Drosophila subgenus
CG13504	2R:1845		not annotated in Drosophila subgenus
CG11170	2R:1848	1654	not annotated in Drosophila subgenus
CG30279	2R:1848	1654	not annotated in Drosophila subgenus
CG3290	2R:1852		not annotated in Drosophila subgenus
CG3264	2R:1853		not annotated in Drosophila subgenus
CG11291	2R:1854		not annotated in Drosophila subgenus
CG33200	2R:1871	1659	not annotated in Drosophila subgenus
CG11362	2R:1886	1667	not annotated in Drosophila subgenus
CG3927	2R:1888	1667	not annotated in Drosophila subgenus
CG3875	2R:1902	1672	not annotated in Drosophila subgenus
CG4250	2R:1909		outside of SB and not annotated in dgri
CG30267	2R:1923	1674	not annotated in Drosophila subgenus
CG13535	2R:1941	1679	not annotated in Drosophila subgenus
CG30187	2R:1950		not annotated in Drosophila subgenus
CG3788	2R:1953	1683	not annotated in Drosophila subgenus
CG13534	2R:1956	1683	not annotated in Drosophila subgenus
CG32835	2R:1957	1683	not annotated in Drosophila subgenus
CG32834	2R:1958	1683	more complex explanation
CG32833	2R:1958	1683	more complex explanation
CG13542	2R:1961		not annotated in Drosophila subgenus
CG2952	2R:1966		not annotated in Drosophila subgenus
CG3082	2R:1967		outside of SB and not annotated in dgri
CG9888	2R:1968		outside of SB and not annotated in dgri
CG30191	2R:1971	1686	not annotated in Drosophila subgenus
CG13538	2R:1973	1686	not annotated in Drosophila subgenus
CG9873	2R:1975	1686	not annotated in Drosophila subgenus
CG3219	2R:1978	1686	not annotated in Drosophila subgenus
CG3215	2R:1979	1686	not annotated in Drosophila subgenus
CG30192	2R:1980	1686	not annotated in Drosophila subgenus
CG13544	2R:1980	1686	not annotated in Drosophila subgenus
CG13539	2R:1986	1686	not annotated in Drosophila subgenus
CG9871	2R:1990		not annotated in Drosophila subgenus
CG13540	2R:1992	1687	not annotated in Drosophila subgenus
CG13541	2R:1995		not annotated in Drosophila subgenus
CG30416	2R:1998	1690	not annotated in Drosophila subgenus
CG30413	2R:2001	1690	not annotated in Drosophila subgenus
CG9875	2R:2005		not annotated in Drosophila subgenus
CG9889	2R:2008	1695	not annotated in Drosophila subgenus
CG9891	2R:2008	1695	not annotated in Drosophila subgenus
CG30414	2R:2009		not annotated in Drosophila subgenus
CG12227	2R:2016	1697	not annotated in Drosophila subgenus
CG13559	2R:2025	1697	not annotated in Drosophila subgenus
CG5372	2R:2035	1700	not annotated in Drosophila subgenus
CG30182	2R:2038	1700	not annotated in Drosophila subgenus
CG10332	2R:2039		not annotated in Drosophila subgenus
CG33706	2R:2039		not annotated in Drosophila subgenus
CG13560	2R:2056		not annotated in Drosophila subgenus
CG12491	2R:2057		not annotated in Drosophila subgenus
CG11300	2R:2058		not annotated in Drosophila subgenus
CG15800	2R:2060	1704	not annotated in Drosophila subgenus
CG30177	2R:2061	1704	not annotated in Drosophila subgenus
CG12752	2R:2064	1705	more complex explanation
CG10327	2R:2074		outside of SB and not annotated in dpse
CG5597	2R:2080		not annotated in Drosophila subgenus
CG17658	2R:2083	1716	more complex explanation
CG5330	2R:2086		outside of SB and not annotated in dmoj
CG3735	2R:2090		outside of SB and not annotated in dpse
CG13565	2R:2093		not annotated in Drosophila subgenus
CG16783	2R:2094	1724	not annotated in Drosophila subgenus
CG2987	2R:2097		outside of SB and not annotated in dpse
CG13566	2R:2098		outside of SB and not annotated in dpse
CG3006	2R:2099		outside of SB and not annotated in dpse
CG3825	2R:2105		outside of SB and not annotated in dvir
CG3832	2R:2107		outside of SB and not annotated in dvir
CG30178	2R:2107		not annotated in Drosophila subgenus
CG3860	2R:2109		outside of SB and not annotated in dvir, dgri
CG4324	2R:2111		not annotated in Drosophila subgenus
CG11388	2R:2114		outside of SB and not annotated in dvir
CG3140	2R:2115		outside of SB and not annotated in dwil, dvir, dmoj
CG11390	2R:2116		outside of SB and not annotated in dvir, dmoj
CG30173	2R:2117		outside of SB and not annotated in dmoj
CG3163	2R:2118		outside of SB and not annotated in dmoj
CG4254	2R:2124		outside of SB and not annotated in dmoj, dgri
CG3988	2R:2125		not annotated in Drosophila subgenus
CG3182	2R:2126		not annotated in Drosophila subgenus
CG13568	2R:2126		outside of SB and not annotated in dpse, dmoj
CG13563	2R:2127		outside of SB and not annotated in dvir, dmoj
CG3186	2R:2128		not annotated in Drosophila subgenus
CG33149	2R:2134		not annotated in Drosophila subgenus
CG30174	2R:2135		outside of SB and not annotated in dvir
CG30179	2R:2136		not annotated in Drosophila subgenus
CG13564	2R:2138		not annotated in Drosophila subgenus
CG3253	2R:2144		outside of SB and not annotated in dmoj
CG13577	2R:2161	1754	not annotated in Drosophila subgenus
CG15873	2R:2176	1756	not annotated in Drosophila subgenus
CG13589	2R:2184	1760	not annotated in Drosophila subgenus
CG13590	2R:2185	1760	not annotated in Drosophila subgenus
CG13591	2R:2187	1760	not annotated in Drosophila subgenus
CG4612	2R:2192		outside of SB and not annotated in dmoj, dgri
CG13592	2R:2194	1763	not annotated in Drosophila subgenus
CG3640	2R:2213	1769	more complex explanation
CG3650	2R:2240		not annotated in Drosophila subgenus
CG15859	2R:2241		not annotated in Drosophila subgenus
CG30420	2R:2242	1778	more complex explanation
CG30425	2R:2246	1779	not annotated in Drosophila subgenus
CG30424	2R:2257		not annotated in Drosophila subgenus
CG30430	2R:2270	1784	not annotated in Drosophila subgenus
CG2665	2R:2272	1784	not annotated in Drosophila subgenus
CG2668	2R:2273	1784	not annotated in Drosophila subgenus
CG6821	3L:0002	1789	not annotated in Drosophila subgenus
CG12483	3L:0004	1789	not annotated in Drosophila subgenus
CG33790	3L:0018	1795	more complex explanation
CG1220	3L:0018	1795	more complex explanation
CG17142	3L:0018	1795	more complex explanation
CG13877	3L:0018	1795	more complex explanation
CG16971	3L:0019		not annotated in Drosophila subgenus
CG33229	3L:0019		more complex explanation
CG34018	3L:0020		more complex explanation
CG32845	3L:0027	1798	not annotated in Drosophila subgenus
CG13883	3L:0031	1798	not annotated in Drosophila subgenus
CG7004	3L:0033		more complex explanation
CG32344	3L:0034		more complex explanation
CG32343	3L:0035		more complex explanation
CG1228	3L:0036	1799	more complex explanation
CG1231	3L:0037		not annotated in Drosophila subgenus
CG13884	3L:0039	1801	not annotated in Drosophila subgenus
CG13891	3L:0042		not annotated in Drosophila subgenus
CG13892	3L:0044	1804	not annotated in Drosophila subgenus
CG32345	3L:0050		not annotated in Drosophila subgenus
CG17129	3L:0055		not annotated in Drosophila subgenus
CG3217	3L:0063	1809	not annotated in Drosophila subgenus
CG13896	3L:0064	1809	not annotated in Drosophila subgenus
CG32341	3L:0067	1809	not annotated in Drosophila subgenus
CG13898	3L:0068	1809	not annotated in Drosophila subgenus
CG34057	3L:0081	1813	not annotated in Drosophila subgenus
CG9094	3L:0089		not annotated in Drosophila subgenus
CG32334	3L:0090		not annotated in Drosophila subgenus
CG32336	3L:0091		not annotated in Drosophila subgenus
CG9120	3L:0095	1817	not annotated in Drosophila subgenus
CG32335	3L:0097		not annotated in Drosophila subgenus
CG9111	3L:0101	1820	more complex explanation
CG32318	3L:0109		not annotated in Drosophila subgenus
CG32320	3L:0132	1833	not annotated in Drosophila subgenus
CG9168	3L:0133	1833	not annotated in Drosophila subgenus
CG9173	3L:0135	1833	more complex explanation
CG1014	3L:0139	1833	not annotated in Drosophila subgenus
CG32331	3L:0139	1833	not annotated in Drosophila subgenus
CG32313	3L:0147		not annotated in Drosophila subgenus
CG1049	3L:0148		not annotated in Drosophila subgenus
CG18170	3L:0154	1839	not annotated in Drosophila subgenus
CG13927	3L:0156	1840	more complex explanation
CG13928	3L:0156	1840	more complex explanation
CG13932	3L:0172	1844	not annotated in Drosophila subgenus
CG18171	3L:0174	1845	not annotated in Drosophila subgenus
CG12035	3L:0174	1845	more complex explanation
[truncated: 1,157 more rows]

## Sheet: missed genes under GO
Gene	IGA	HCB#	Explnation why a gene is missed
CG13376	X:0005		outside of SB and not annotated in dmoj
CG3114	X:0006		outside of SB and not annotated in dwil
CG13375	X:0007		outside of SB and not annotated in dwil
CG13373	X:0020		not annotated in Drosophila subgenus
CG18275	X:0021		not annotated in Drosophila subgenus
CG32817	X:0022		not annotated in Drosophila subgenus
CG18166	X:0023		not annotated in Drosophila subgenus
CG13369	X:0036		outside of SB and not annotated in dwil, dmoj, dgri
CG13364	X:0036		outside of SB and not annotated in dwil, dmoj, dgri
CG16983	X:0043		not annotated in Drosophila subgenus
CG5273	X:0047		outside of SB and not annotated in dwil
CG7434	X:0048		outside of SB and not annotated in dwil
CG13359	X:0053		not annotated in Drosophila subgenus
CG13358	X:0054		not annotated in Drosophila subgenus
CG14635	X:0057	23	not annotated in Drosophila subgenus
CG3713	X:0058	23	not annotated in Drosophila subgenus
CG14634	X:0059	23	not annotated in Drosophila subgenus
CG11664	X:0060	23	not annotated in Drosophila subgenus
CG11663	X:0063	23	not annotated in Drosophila subgenus
CG18823	X:0072	25	not annotated in Drosophila subgenus
CG11639	X:0073	25	not annotated in Drosophila subgenus
CG14631	X:0074	25	not annotated in Drosophila subgenus
CG32814	X:0075	25	not annotated in Drosophila subgenus
CG3658	X:0076	26	more complex explanation
CG14628	X:0081	27	not annotated in Drosophila subgenus
CG11398	X:0093		not annotated in Drosophila subgenus
CG3638	X:0094		not annotated in Drosophila subgenus
CG32812	X:0097		outside of SB and not annotated in dmoj
CG32811	X:0099		not annotated in Drosophila subgenus
CG18091	X:0100		not annotated in Drosophila subgenus
CG14774	X:0111		not annotated in Drosophila subgenus
CG14773	X:0115	42	not annotated in Drosophila subgenus
CG32810	X:0134		outside of SB and not annotated in dyak
CG11509	X:0136	48	not annotated in Drosophila subgenus
CG14798	X:0140	50	not annotated in Drosophila subgenus
CG14809	X:0143	51	not annotated in Drosophila subgenus
CG32806	X:0145		not annotated in Drosophila subgenus
CG14810	X:0146		not annotated in Drosophila subgenus
CG14811	X:0147		not annotated in Drosophila subgenus
CG14799	X:0148		not annotated in Drosophila subgenus
CG14816	X:0154		outside of SB and not annotated in dwil
CG32802	X:0169		not annotated in Drosophila subgenus
CG14054	X:0180		not annotated in Drosophila subgenus
CG4199	X:0181	66	more complex explanation
CG4194	X:0181	66	more complex explanation
CG32804	X:0181	66	not annotated in Drosophila subgenus
CG3895	X:0185		not annotated in Drosophila subgenus
CG3621	X:0192		not annotated in Drosophila subgenus
CG3466	X:0194		not annotated in Drosophila subgenus
CG10755	X:0195		not annotated in Drosophila subgenus
CG17776	X:0197		outside of SB and not annotated in dmoj
CG17777	X:0198		outside of SB and not annotated in dmoj
CG14053	X:0200	74	not annotated in Drosophila subgenus
CG34052	X:0219	80	not annotated in Drosophila subgenus
CG2854	X:0221		not annotated in Drosophila subgenus
CG33218	X:0222		not annotated in Drosophila subgenus
CG14049	X:0223		not annotated in Drosophila subgenus
CG32797	X:0230		not annotated in Drosophila subgenus
CG7952	X:0231		outside of SB and not annotated in dgri
CG7925	X:0232		outside of SB and not annotated in dgri
CG8590	X:0241		outside of SB and not annotated in dgri
CG13762	X:0246		not annotated in Drosophila subgenus
CG2706	X:0260		outside of SB and not annotated in dpse
CG32794	X:0274	98	not annotated in Drosophila subgenus
CG14265	X:0294	100	not annotated in Drosophila subgenus
CG14266	X:0294	100	not annotated in Drosophila subgenus
CG10788	X:0294	100	not annotated in Drosophila subgenus
CG10781	X:0294	100	not annotated in Drosophila subgenus
CG10789	X:0294	100	not annotated in Drosophila subgenus
CG10801	X:0299	101	not annotated in Drosophila subgenus
CG13021	X:0307	103	not annotated in Drosophila subgenus
CG12462	X:0314		not annotated in Drosophila subgenus
CG2947	X:0317		not annotated in Drosophila subgenus
CG33221	X:0319	108	not annotated in Drosophila subgenus
CG32789	X:0320	108	not annotated in Drosophila subgenus
CG32786	X:0333		not annotated in Drosophila subgenus
CG6450	X:0336		more complex explanation
CG6414	X:0338		outside of SB and not assembled in dana
CG15375	X:0344		not annotated in Drosophila subgenus
CG15576	X:0357	120	not annotated in Drosophila subgenus
CG12691	X:0358	120	more complex explanation
CG15572	X:0359	120	more complex explanation
CG15577	X:0360	120	more complex explanation
CG15578	X:0361	120	not annotated in Drosophila subgenus
CG12692	X:0362	120	not annotated in Drosophila subgenus
CG15579	X:0363	120	more complex explanation
CG12688	X:0369	122	not annotated in Drosophila subgenus
CG32773	X:0370	122	not annotated in Drosophila subgenus
CG12685	X:0372	122	not annotated in Drosophila subgenus
CG12684	X:0382	127	not annotated in Drosophila subgenus
CG12184	X:0384		not annotated in Drosophila subgenus
CG12179	X:0385		not annotated in Drosophila subgenus
CG6998	X:0395		outside of SB and not annotated in dwil
CG12683	X:0399		not annotated in Drosophila subgenus
CG15472	X:0400		not annotated in Drosophila subgenus
CG2871	X:0402	133	not annotated in Drosophila subgenus
CG2861	X:0405		not annotated in Drosophila subgenus
CG12681	X:0407	134	not annotated in Drosophila subgenus
CG12732	X:0441	145	not annotated in Drosophila subgenus
CG17763	X:0455	152	not annotated in Drosophila subgenus
CG32763	X:0457	153	more complex explanation
CG15767	X:0487		not annotated in Drosophila subgenus
CG12239	X:0488		outside of SB and not annotated in dgri
CG4052	X:0489		not annotated in Drosophila subgenus
CG18341	X:0490		outside of SB and not annotated in dwil, dgri
CG15766	X:0491		outside of SB and not annotated in dgri
CG15765	X:0492		outside of SB and not annotated in dgri
CG11462	X:0492		not annotated in Drosophila subgenus
CG12729	X:0493		not annotated in Drosophila subgenus
CG15764	X:0494		not annotated in Drosophila subgenus
CG12728	X:0503	164	not annotated in Drosophila subgenus
CG4336	X:0513		outside of SB and not annotated in dgri
CG32745	X:0536		not annotated in Drosophila subgenus
CG11700	X:0537		not annotated in Drosophila subgenus
CG33664	X:0553		not annotated in Drosophila subgenus
CG33669	X:0554		not annotated in Drosophila subgenus
CG33668	X:0555		not annotated in Drosophila subgenus
CG33667	X:0557	183	not annotated in Drosophila subgenus
CG33666	X:0558	183	not annotated in Drosophila subgenus
CG33665	X:0559	183	not annotated in Drosophila subgenus
CG3918	X:0561		outside of SB and not annotated in dmoj
CG3342	X:0561		outside of SB and not annotated in dmoj
CG14443	X:0570	186	not annotated in Drosophila subgenus
CG32741	X:0582	190	not annotated in Drosophila subgenus
CG14439	X:0586		outside of SB and not annotated in dgri
CG14438	X:0587		outside of SB and not annotated in dgri
CG4575	X:0602		not annotated in Drosophila subgenus
CG32733	X:0603		not annotated in Drosophila subgenus
CG4593	X:0614		outside of SB and not assembled in dvir
CG8300	X:0622		outside of SB and not annotated in dwil
CG4626	X:0622		outside of SB and not annotated in dwil
CG18155	X:0631		outside of SB and not assembled in dwil
CG15034	X:0633	212	not annotated in Drosophila subgenus
CG32727	X:0637	212	not annotated in Drosophila subgenus
CG15036	X:0639	212	not annotated in Drosophila subgenus
CG32726	X:0640	212	not annotated in Drosophila subgenus
CG32719	X:0642	212	not annotated in Drosophila subgenus
CG12689	X:0645	212	not annotated in Drosophila subgenus
CG32718	X:0656		not annotated in Drosophila subgenus
CG15325	X:0664		outside of SB and not annotated in dwil, dmoj
CG10932	X:0665		outside of SB and not annotated in dmoj
CG11386	X:0669	223	not annotated in Drosophila subgenus
CG33222	X:0670	223	not annotated in Drosophila subgenus
CG15330	X:0685	229	not annotated in Drosophila subgenus
CG2212	X:0686	229	more complex explanation
CG1543	X:0687		outside of SB and not annotated in dwil, dvir
CG15333	X:0687		not annotated in Drosophila subgenus
CG2233	X:0688		outside of SB and not annotated in dvir
CG10759	X:0711		not annotated in Drosophila subgenus
CG32715	X:0717	243	not annotated in Drosophila subgenus
CG15344	X:0722	244	not annotated in Drosophila subgenus
CG15345	X:0724		not annotated in Drosophila subgenus
CG32711	X:0727		not annotated in Drosophila subgenus
CG33223	X:0737	250	not annotated in Drosophila subgenus
CG32714	X:0738	250	not annotated in Drosophila subgenus
CG1634	X:0740		outside of SB and not assembled in dpse
CG11219	X:0740		outside of SB and not assembled in dpse
CG12113	X:0741		outside of SB and not assembled in dpse
CG12112	X:0742		not annotated in Drosophila subgenus
CG2056	X:0745		outside of SB and not annotated in dgri
CG12081	X:0747	253	more complex explanation
CG12659	X:0747	253	more complex explanation
CG1795	X:0752		outside of SB and not annotated in dana, dpse
CG2004	X:0754	256	more complex explanation
CG32710	X:0758	258	not annotated in Drosophila subgenus
CG3898	X:0766	259	not annotated in Drosophila subgenus
CG32709	X:0768	259	not annotated in Drosophila subgenus
CG15364	X:0768	259	not annotated in Drosophila subgenus
CG15366	X:0773	260	not annotated in Drosophila subgenus
CG32708	X:0777		not annotated in Drosophila subgenus
CG32706	X:0778		not annotated in Drosophila subgenus
CG6999	X:0779		not annotated in Drosophila subgenus
CG8989	X:0789		not annotated in Drosophila subgenus
CG11042	X:0789		not annotated in Drosophila subgenus
CG17438	X:0814	277	not annotated in Drosophila subgenus
CG17440	X:0816		not annotated in Drosophila subgenus
CG12667	X:0821	280	not annotated in Drosophila subgenus
CG12149	X:0823		outside of SB and not assembled in dvir
CG12650	X:0828	281	not annotated in Drosophila subgenus
CG15316	X:0829	281	not annotated in Drosophila subgenus
CG34028	X:0830	281	not annotated in Drosophila subgenus
CG34026	X:0830	281	not annotated in Drosophila subgenus
CG15321	X:0844		not annotated in Drosophila subgenus
CG1468	X:0854	290	not annotated in Drosophila subgenus
CG2990	X:0867		more complex explanation
CG2972	X:0875		more complex explanation
CG2974	X:0875		outside of SB and not assembled in dana
CG12645	X:0878	295	not annotated in Drosophila subgenus
CG12644	X:0879	295	not annotated in Drosophila subgenus
CG32691	X:0880	295	not annotated in Drosophila subgenus
CG32690	X:0882	295	not annotated in Drosophila subgenus
CG2968	X:0884		outside of SB and not annotated in dpse
CG2962	X:0885		outside of SB and not annotated in dpse
CG15308	X:0886		not annotated in Drosophila subgenus
CG2967	X:0887		outside of SB and not annotated in dpse
CG32689	X:0887		outside of SB and not annotated in dpse
CG2961	X:0888		outside of SB and not annotated in dyak, dpse
CG32688	X:0889		outside of SB and not annotated in dpse
CG2909	X:0892		outside of SB and not annotated in dwil, dvir, dmoj
CG2227	X:0892		outside of SB and not annotated in dwil
CG32679	X:0897	297	not annotated in Drosophila subgenus
CG2885	X:0901	298	not annotated in Drosophila subgenus
CG12640	X:0901	298	not annotated in Drosophila subgenus
CG2887	X:0906		outside of SB and not annotated in dpse, dgri
CG15296	X:0909	302	not annotated in Drosophila subgenus
CG9807	X:0915	303	not annotated in Drosophila subgenus
CG9806	X:0916	303	not annotated in Drosophila subgenus
CG2111	X:0917	303	not annotated in Drosophila subgenus
CG32673	X:0918	303	not annotated in Drosophila subgenus
CG1826	X:0925		outside of SB and not annotated in dwil
CG15211	X:0926		outside of SB and not annotated in dwil, dvir
CG1683	X:0926		outside of SB and not annotated in dere, dyak, dana, dwil, dvir
CG16944	X:0926		outside of SB and not annotated in dwil, dvir
CG15208	X:0937		not annotated in Drosophila subgenus
CG32671	X:0942	312	not annotated in Drosophila subgenus
CG32670	X:0942	312	not annotated in Drosophila subgenus
CG12101	X:0957		outside of SB and not annotated in dmoj
CG1394	X:0971	317	not annotated in Drosophila subgenus
CG15200	X:0972	317	not annotated in Drosophila subgenus
CG11106	X:0973	317	not annotated in Drosophila subgenus
CG11759	X:0982		outside of SB and not annotated in dvir, dmoj
CG11757	X:0983		outside of SB and not assembled in dpse
CG1597	X:0984		outside of SB and not assembled in dpse
CG11756	X:0985		not annotated in Drosophila subgenus
CG15196	X:0993		not annotated in Drosophila subgenus
CG12622	X:0994		not annotated in Drosophila subgenus
CG1749	X:1003		more complex explanation
CG1751	X:1004		more complex explanation
CG33235	X:1005		not annotated in Drosophila subgenus
CG1572	X:1007		outside of SB and not annotated in dwil
CG11709	X:1008	326	not annotated in Drosophila subgenus
CG1558	X:1009	327	not annotated in Drosophila subgenus
CG11695	X:1012		not annotated in Drosophila subgenus
CG1763	X:1013		not annotated in Drosophila subgenus
CG1561	X:1013		not annotated in Drosophila subgenus
CG2533	X:1014	329	not annotated in Drosophila subgenus
CG15741	X:1036		not annotated in Drosophila subgenus
CG1847	X:1043		outside of SB and not assembled in dana
CG11802	X:1044		outside of SB and not assembled in dana
CG15739	X:1045		outside of SB and not annotated in dmoj, dgri and not assembled in dana
CG10352	X:1046		outside of SB and not annotated in dmoj, dgri and not assembled in dana
CG10353	X:1047		outside of SB and not annotated in dmoj, dgri and not assembled in dana
CG1844	X:1048		outside of SB and not annotated in dmoj, dgri and not assembled in dana
CG1840	X:1049		not annotated in Drosophila subgenus
CG15738	X:1050		outside of SB and not assembled in dana
CG15737	X:1051		outside of SB and not assembled in dana
CG1559	X:1052		outside of SB and not assembled in dana
CG2467	X:1053		outside of SB and not assembled in dana
CG2471	X:1054		outside of SB and not assembled in dana
CG10362	X:1055		outside of SB and not assembled in dana
CG1522	X:1056		outside of SB and not assembled in dana
CG1505	X:1057		outside of SB and not assembled in dana
CG1502	X:1058		not annotated in Drosophila subgenus
CG18130	X:1059		outside of SB and not assembled in dana
CG1500	X:1060		outside of SB and not assembled in dana
CG1806	X:1061		outside of SB and not assembled in dana
CG1492	X:1061		not annotated in Drosophila subgenus
CG1488	X:1067		not annotated in Drosophila subgenus
CG1950	X:1069	347	not annotated in Drosophila subgenus
CG12721	X:1071	347	not annotated in Drosophila subgenus
CG15734	X:1072	347	not annotated in Drosophila subgenus
CG1924	X:1075	347	not annotated in Drosophila subgenus
CG32655	X:1078	347	not annotated in Drosophila subgenus
CG2577	X:1079		outside of SB and not annotated in dwil, dmoj
CG15732	X:1080		outside of SB and not annotated in dmoj, dgri
CG32651	X:1081		not annotated in Drosophila subgenus
CG32652	X:1083	348	not annotated in Drosophila subgenus
CG2559	X:1091	350	not annotated in Drosophila subgenus
CG17762	X:1107		not annotated in Drosophila subgenus
CG2028	X:1108		not annotated in Drosophila subgenus
CG12717	X:1113	359	not annotated in Drosophila subgenus
CG4661	X:1118		not annotated in Drosophila subgenus
CG33651	X:1119		not annotated in Drosophila subgenus
CG32643	X:1133	364	not annotated in Drosophila subgenus
CG2209	X:1135	364	not annotated in Drosophila subgenus
CG32645	X:1148		outside of SB and not annotated in dpse
CG4318	X:1149		not annotated in Drosophila subgenus
CG32640	X:1155	371	not annotated in Drosophila subgenus
CG32641	X:1156	371	not annotated in Drosophila subgenus
CG1903	X:1159		outside of SB and not annotated in dgri
CG32639	X:1161	373	not annotated in Drosophila subgenus
CG15742	X:1162	373	not annotated in Drosophila subgenus
CG32636	X:1173	379	not annotated in Drosophila subgenus
CG32634	X:1179	381	not annotated in Drosophila subgenus
CG12725	X:1184		not annotated in Drosophila subgenus
CG1681	X:1185		outside of SB and not annotated in dwil
CG1716	X:1187		outside of SB and not annotated in dvir, dmoj
CG32635	X:1188		outside of SB and not annotated in dwil
CG12726	X:1188		not annotated in Drosophila subgenus
CG15753	X:1189		outside of SB and not annotated in dwil
CG32629	X:1196	383	not annotated in Drosophila subgenus
CG15758	X:1197	383	not annotated in Drosophila subgenus
CG11177	X:1202		outside of SB and not annotated in dgri and not assembled in dpse
CG12175	X:1202		outside of SB and not assembled in dpse
CG11176	X:1203		outside of SB and not assembled in dpse
CG2691	X:1204		outside of SB and not assembled in dpse
CG11172	X:1205		outside of SB and not assembled in dpse
CG12176	X:1206		outside of SB and not assembled in dpse
CG11164	X:1207		outside of SB and not assembled in dpse
CG15760	X:1208		outside of SB and not assembled in dpse
CG11162	X:1209		not annotated in Drosophila subgenus
CG12177	X:1210		outside of SB and not annotated in dwil, dvir, dmoj
CG11158	X:1211		not annotated in Drosophila subgenus
CG9940	X:1211		more complex explanation
CG32627	X:1211		more complex explanation
CG32628	X:1211		more complex explanation
CG9941	X:1212		more complex explanation
CG10993	X:1223	392	not annotated in Drosophila subgenus
CG32606	X:1232	395	not annotated in Drosophila subgenus
CG32613	X:1233	395	not annotated in Drosophila subgenus
CG32616	X:1235	395	not annotated in Drosophila subgenus
CG33247	X:1236	395	not annotated in Drosophila subgenus
CG33246	X:1237	395	not annotated in Drosophila subgenus
CG33245	X:1238	395	not annotated in Drosophila subgenus
CG33244	X:1239	395	not annotated in Drosophila subgenus
CG33243	X:1240	395	not annotated in Drosophila subgenus
CG33242	X:1241	395	not annotated in Drosophila subgenus
CG33241	X:1242	395	not annotated in Drosophila subgenus
CG33240	X:1243	395	not annotated in Drosophila subgenus
CG33239	X:1244	395	not annotated in Drosophila subgenus
CG33238	X:1245	395	not annotated in Drosophila subgenus
CG33237	X:1246	395	not annotated in Drosophila subgenus
CG33236	X:1247	395	not annotated in Drosophila subgenus
CG12454	X:1248	395	not annotated in Drosophila subgenus
CG13402	X:1252	395	not annotated in Drosophila subgenus
CG9400	X:1275	402	not annotated in Drosophila subgenus
CG18157	X:1276	402	not annotated in Drosophila subgenus
CG32598	X:1277	402	not annotated in Drosophila subgenus
CG32601	X:1278	402	not annotated in Drosophila subgenus
CG18313	X:1278	402	not annotated in Drosophila subgenus
CG14414	X:1281		more complex explanation
CG14413	X:1282		more complex explanation
CG5310	X:1283		more complex explanation
CG9413	X:1284		more complex explanation
CG18657	X:1285		outside of SB and not annotated in dana
CG5321	X:1286		outside of SB and not annotated in dana, dpse
CG10521	X:1287		outside of SB and not assembled in dana
CG32595	X:1287		not annotated in Drosophila subgenus
CG15890	X:1288		outside of SB and not assembled in dana
CG5334	X:1289		not annotated in Drosophila subgenus
CG5347	X:1290		not annotated in Drosophila subgenus
CG9540	X:1291		outside of SB and not assembled in dana
CG9538	X:1292		outside of SB and not assembled in dana
CG9533	X:1293		outside of SB and not assembled in dana
CG14408	X:1294		outside of SB and not assembled in dana
CG14410	X:1296	403	not annotated in Drosophila subgenus
CG32590	X:1298		outside of SB and not annotated in dwil
CG14406	X:1299	404	not annotated in Drosophila subgenus
CG9504	X:1299	404	not annotated in Drosophila subgenus
CG32591	X:1299	404	not annotated in Drosophila subgenus
CG9030	X:1301		not annotated in Drosophila subgenus
CG5560	X:1306		not annotated in Drosophila subgenus
CG32588	X:1319		not annotated in Drosophila subgenus
CG15030	X:1321	410	not annotated in Drosophila subgenus
CG15031	X:1323		not annotated in Drosophila subgenus
CG9106	X:1324		outside of SB and not annotated in dgri
CG6146	X:1328		outside of SB and not annotated in dwil
CG15641	X:1342	417	not annotated in Drosophila subgenus
CG6324	X:1346		not annotated in Drosophila subgenus
CG32584	X:1350	422	not annotated in Drosophila subgenus
CG7860	X:1350	422	more complex explanation
CG15643	X:1350	422	more complex explanation
CG32586	X:1356	425	not annotated in Drosophila subgenus
CG8117	X:1357		not annotated in Drosophila subgenus
CG8119	X:1358		not annotated in Drosophila subgenus
CG15599	X:1361	426	not annotated in Drosophila subgenus
CG8231	X:1374		outside of SB and not annotated in dpse
CG8239	X:1375		outside of SB and not annotated in dana, dpse
CG8948	X:1376		outside of SB and not annotated in dana, dpse
CG8260	X:1376		not annotated in Drosophila subgenus
CG8288	X:1377		outside of SB and not annotated in dana, dpse
CG17209	X:1378		outside of SB and not annotated in dpse
CG8952	X:1378		outside of SB and not annotated in dana, dpse
CG33172	X:1379		outside of SB and not annotated in dana, dpse and not assembled in dvir, dmoj
CG33173	X:1380		not annotated in Drosophila subgenus
CG8959	X:1381		not annotated in Drosophila subgenus
CG8962	X:1382		outside of SB and not annotated in dpse and not assembled in dana
CG8470	X:1383		outside of SB and not annotated in dpse, dwil
CG8497	X:1384		outside of SB and not annotated in dpse
CG8974	X:1384		outside of SB and not annotated in dana, dpse, dwil, dmoj and not assembled in dvir, dgri
CG32581	X:1385		outside of SB and not annotated in dere, dyak, dana, dpse, dvir, dgri
CG15602	X:1386		outside of SB and not annotated in dana, dpse
CG8995	X:1387		outside of SB and not annotated in dana, dpse, dwil
CG8509	X:1388		outside of SB and not annotated in dpse, dgri and not assembled in dana
CG8544	X:1389		outside of SB and not annotated in dpse, dgri
CG9012	X:1390		outside of SB and not annotated in dpse
CG32582	X:1391		not annotated in Drosophila subgenus
CG8565	X:1392		not annotated in Drosophila subgenus
CG9020	X:1393		outside of SB and not annotated in dpse and not assembled in dmoj
CG8578	X:1394		outside of SB and not annotated in dpse and not assembled in dana, dvir, dmoj
CG9032	X:1394		outside of SB and not annotated in dpse, dwil and not assembled in dana, dmoj, dgri
CG9038	X:1395		outside of SB and not annotated in dana, dpse, dvir and not assembled in dmoj
CG15914	X:1396		outside of SB and not annotated in dpse
CG9045	X:1397		outside of SB and not annotated in dana, dpse and not assembled in dvir, dmoj
CG33250	X:1398		outside of SB and not annotated in dpse, dvir and not assembled in dmoj
CG10545	X:1399		outside of SB and not annotated in dpse and not assembled in dvir, dmoj
CG8893	X:1400		not annotated in Drosophila subgenus
CG16952	X:1401		outside of SB and not annotated in dpse and not assembled in dana, dvir, dmoj
CG9056	X:1402		outside of SB and not annotated in dpse and not assembled in dvir, dmoj
CG9066	X:1403		not annotated in Drosophila subgenus
CG15916	X:1404		outside of SB and not annotated in dpse, dmoj
CG18102	X:1405		outside of SB and not annotated in dpse
CG9096	X:1406		outside of SB and not annotated in dana, dpse, dmoj and not assembled in dvir
CG8909	X:1407		outside of SB and not annotated in dpse
CG8916	X:1408		outside of SB and not annotated in dana, dpse
CG17336	X:1409		outside of SB and not annotated in dana, dpse
CG33180	X:1410		outside of SB and not annotated in dpse and not assembled in dvir, dmoj
CG9126	X:1411		outside of SB and not annotated in dpse and not assembled in dvir, dmoj
CG8924	X:1412		outside of SB and not annotated in dpse, dwil, dvir
CG8928	X:1413		outside of SB and not annotated in dpse, dmoj, dgri and not assembled in dvir
CG15603	X:1414		outside of SB and not annotated in dpse and not assembled in dana
CG15604	X:1415		outside of SB and not annotated in dpse and not assembled in dana
CG9163	X:1416		outside of SB and not annotated in dpse and not assembled in dana
CG12697	X:1417		outside of SB and not annotated in dwil, dmoj, dgri and not assembled in dvir
CG9170	X:1418		outside of SB and not annotated in dana, dpse
CG8931	X:1419		not annotated in Drosophila subgenus
CG9172	X:1420		not annotated in Drosophila subgenus
CG9177	X:1421		more complex explanation
CG8933	X:1422		outside of SB and not annotated in dana, dpse
CG8939	X:1423		outside of SB and not annotated in dpse
CG9209	X:1424		outside of SB and not annotated in dana, dpse
CG12698	X:1425		outside of SB and not annotated in dana
CG32580	X:1426		not annotated in Drosophila subgenus
CG12395	X:1427		outside of SB and not assembled in dana
CG14948	X:1428		outside of SB and not annotated in dana
CG9212	X:1429		outside of SB and not assembled in dana
CG9214	X:1430		outside of SB and not annotated in dana
CG8958	X:1431		outside of SB and not annotated in dana
CG9216	X:1432		outside of SB and not assembled in dana
CG32577	X:1433		outside of SB and not assembled in dana
CG9908	X:1434		outside of SB and not assembled in dana
CG12507	X:1435		outside of SB and not assembled in dana
CG13956	X:1436		outside of SB and not assembled in dana
CG3415	X:1436		outside of SB and not assembled in dana
CG3422	X:1437		outside of SB and not annotated in dpse and not assembled in dana
CG3525	X:1438		outside of SB and not assembled in dana
CG32576	X:1439		outside of SB and not assembled in dana
CG3560	X:1439		outside of SB and not assembled in dana
CG3606	X:1440		outside of SB and not assembled in dana
CG9911	X:1441		outside of SB and not annotated in dyak and not assembled in dana
CG3632	X:1442		outside of SB and not annotated in dyak and not assembled in dana
CG3679	X:1443		outside of SB and not annotated in dyak and not assembled in dana
CG9914	X:1444		outside of SB and not annotated in dyak and not assembled in dana
CG9915	X:1445		outside of SB and not assembled in dana
CG33251	X:1446		outside of SB and not assembled in dana
CG13957	X:1447		outside of SB and not assembled in dana
CG9916	X:1448		outside of SB and not assembled in dana
CG9917	X:1449		outside of SB and not assembled in dana
CG32579	X:1450		outside of SB and not assembled in dana
CG3692	X:1451		outside of SB and not assembled in dana
CG9919	X:1451		outside of SB and not assembled in dana
CG9921	X:1452		outside of SB and not assembled in dana
CG12223	X:1453		outside of SB and not assembled in dana
CG4200	X:1454		outside of SB and not assembled in dana
CG9998	X:1455		outside of SB and not assembled in dana
CG32578	X:1456		outside of SB and not assembled in dana
CG4211	X:1457		outside of SB and not assembled in dana
CG18734	X:1458		outside of SB and not assembled in dana
CG9992	X:1459		outside of SB and not assembled in dana
CG4239	X:1460		outside of SB and not assembled in dana
CG9984	X:1461		outside of SB and not assembled in dana
CG4252	X:1462		more complex explanation
CG9981	X:1463		outside of SB and not assembled in dana
CG4301	X:1464		outside of SB and not assembled in dana
CG4394	X:1465		outside of SB and not assembled in dana
CG9968	X:1465		outside of SB and not assembled in dana
CG34015	X:1470	435	not annotated in Drosophila subgenus
CG9906	X:1472	435	not annotated in Drosophila subgenus
CG9903	X:1473		not annotated in Drosophila subgenus
CG9902	X:1474		not annotated in Drosophila subgenus
CG9901	X:1475		not annotated in Drosophila subgenus
CG9842	X:1476		not annotated in Drosophila subgenus
CG9819	X:1477		not annotated in Drosophila subgenus
CG4443	X:1480		not annotated in Drosophila subgenus
CG4453	X:1482		outside of SB and not annotated in dvir
CG9777	X:1485	441	not annotated in Drosophila subgenus
CG32573	X:1489	444	not annotated in Drosophila subgenus
CG13012	X:1490	445	more complex explanation
CG13010	X:1491		not annotated in Drosophila subgenus
CG9699	X:1494		outside of SB and not annotated in dwil
CG4678	X:1495		not annotated in Drosophila subgenus
CG9676	X:1495		not annotated in Drosophila subgenus
CG9675	X:1495		not annotated in Drosophila subgenus
CG9673	X:1495		not annotated in Drosophila subgenus
CG4653	X:1495		not annotated in Drosophila subgenus
CG9672	X:1495		not annotated in Drosophila subgenus
CG32568	X:1498	447	not annotated in Drosophila subgenus
CG9606	X:1502	450	more complex explanation
CG4789	X:1505		outside of SB and not annotated in dwil, dvir, dmoj
CG9125	X:1506		outside of SB and not annotated in dwil, dvir, dmoj
CG13004	X:1510		outside of SB and not assembled in dpse
CG9108	X:1511		outside of SB and not annotated in dana and not assembled in dpse
CG13003	X:1512		outside of SB and not assembled in dpse
CG4872	X:1513		outside of SB and not annotated in dwil and not assembled in dpse
CG9104	X:1513		outside of SB and not assembled in dpse
CG4875	X:1514		outside of SB and not assembled in dana, dpse
CG9099	X:1514		outside of SB and not assembled in dpse
CG4880	X:1515		outside of SB and not assembled in dpse
CG13002	X:1516		outside of SB and not assembled in dpse
CG33252	X:1517		not annotated in Drosophila subgenus
CG4928	X:1518		outside of SB and not assembled in dpse
CG9089	X:1519		outside of SB and not assembled in dpse
CG13001	X:1520		outside of SB and not assembled in dpse
CG13000	X:1521		not annotated in Drosophila subgenus
CG4937	X:1522		outside of SB and not assembled in dpse
CG9086	X:1523		outside of SB and not assembled in dpse
CG12433	X:1525	454	not annotated in Drosophila subgenus
CG32561	X:1536	459	not annotated in Drosophila subgenus
CG32563	X:1542	460	not annotated in Drosophila subgenus
CG8661	X:1556		not annotated in Drosophila subgenus
CG12991	X:1570		outside of SB and not annotated in dwil
CG12992	X:1570		not annotated in Drosophila subgenus
CG5675	X:1571		outside of SB and not annotated in dwil
CG8326	X:1573	466	not annotated in Drosophila subgenus
CG6398	X:1590		outside of SB and not annotated in dmoj
CG6474	X:1591		more complex explanation
CG8142	X:1591		more complex explanation
CG7835	X:1598	476	not annotated in Drosophila subgenus
CG6788	X:1599		not annotated in Drosophila subgenus
CG6835	X:1600		not annotated in Drosophila subgenus
CG32496	X:1601		not annotated in Drosophila subgenus
CG32494	X:1606	478	not annotated in Drosophila subgenus
CG15911	X:1608	478	not annotated in Drosophila subgenus
CG32552	X:1610		not annotated in Drosophila subgenus
CG7135	X:1618		not annotated in Drosophila subgenus
CG12612	X:1620		not annotated in Drosophila subgenus
CG32553	X:1621		not annotated in Drosophila subgenus
CG15060	X:1629	486	not annotated in Drosophila subgenus
CG15059	X:1631	486	not annotated in Drosophila subgenus
CG15058	X:1632	486	not annotated in Drosophila subgenus
CG15057	X:1633	486	not annotated in Drosophila subgenus
CG15061	X:1635	486	not annotated in Drosophila subgenus
CG6179	X:1641	486	more complex explanation
CG15056	X:1645	488	not annotated in Drosophila subgenus
CG6318	X:1656		not annotated in Drosophila subgenus
CG6407	X:1657		outside of SB and not annotated in dana, dpse
CG6481	X:1661	490	not annotated in Drosophila subgenus
CG15042	X:1662	490	not annotated in Drosophila subgenus
CG6531	X:1666		outside of SB and not annotated in dpse
CG6585	X:1674	493	not annotated in Drosophila subgenus
CG6900	X:1679		not annotated in Drosophila subgenus
CG6961	X:1680		not annotated in Drosophila subgenus
CG7001	X:1681		outside of SB and not annotated in dvir, dmoj
CG7053	X:1681		outside of SB and not annotated in dvir and not assembled in dmoj
CG7088	X:1681		not annotated in Drosophila subgenus
CG7058	X:1682		outside of SB and not annotated in dvir and not assembled in dmoj
CG7095	X:1683		outside of SB and not assembled in dvir
CG32543	X:1684		outside of SB and not assembled in dvir
CG7358	X:1697		outside of SB and not annotated in dmoj
CG14189	X:1701	499	not annotated in Drosophila subgenus
CG14190	X:1702	499	not annotated in Drosophila subgenus
CG33254	X:1703	499	not annotated in Drosophila subgenus
CG7406	X:1704	499	not annotated in Drosophila subgenus
CG14191	X:1705	499	not annotated in Drosophila subgenus
CG7423	X:1706	499	not annotated in Drosophila subgenus
CG15882	X:1707	499	not annotated in Drosophila subgenus
CG7453	X:1713		outside of SB and not annotated in dmoj, dgri
CG33253	X:1714		outside of SB and not annotated in dmoj, dgri
CG14193	X:1716	501	not annotated in Drosophila subgenus
CG32538	X:1736		not annotated in Drosophila subgenus
CG32827	X:1737	511	not annotated in Drosophila subgenus
CG12200	X:1738	512	not annotated in Drosophila subgenus
CG14218	X:1753		outside of SB and not annotated in dpse, dwil, dgri
CG14204	X:1754		not annotated in Drosophila subgenus
CG14219	X:1755		outside of SB and not annotated in dere, dpse, dwil
CG14205	X:1756		outside of SB and not annotated in dwil
CG14209	X:1760	520	not annotated in Drosophila subgenus
CG14221	X:1762		not annotated in Drosophila subgenus
CG14213	X:1767		outside of SB and not annotated in dwil
CG12237	X:1768		outside of SB and not annotated in dwil
CG14214	X:1769		outside of SB and not annotated in dwil, dgri
CG14227	X:1779	528	not annotated in Drosophila subgenus
CG12700	X:1796	535	not annotated in Drosophila subgenus
CG11941	X:1797	535	not annotated in Drosophila subgenus
CG11942	X:1798	535	not annotated in Drosophila subgenus
CG15618	X:1801		more complex explanation
CG11937	X:1802	537	not annotated in Drosophila subgenus
CG32821	X:1803		not annotated in Drosophila subgenus
CG9570	X:1808	538	not annotated in Drosophila subgenus
CG9571	X:1809	538	not annotated in Drosophila subgenus
CG32825	X:1810	538	not annotated in Drosophila subgenus
CG15323	X:1811	538	not annotated in Drosophila subgenus
CG12656	X:1812	538	not annotated in Drosophila subgenus
CG32824	X:1814	538	not annotated in Drosophila subgenus
CG9579	X:1820	539	more complex explanation
CG9580	X:1821		not annotated in Drosophila subgenus
CG33491	X:1822		not annotated in Drosophila subgenus
CG33497	X:1823		not annotated in Drosophila subgenus
CG33496	X:1824		not annotated in Drosophila subgenus
CG32823	X:1825		not annotated in Drosophila subgenus
CG33487	X:1826		not annotated in Drosophila subgenus
CG33499	X:1827		not annotated in Drosophila subgenus
CG33498	X:1828		not annotated in Drosophila subgenus
CG1631	X:1835		not annotated in Drosophila subgenus
CG15462	X:1836		not annotated in Drosophila subgenus
CG12679	X:1837		not annotated in Drosophila subgenus
CG15460	X:1838		not annotated in Drosophila subgenus
CG15461	X:1854	549	not annotated in Drosophila subgenus
CG32504	X:1857		not annotated in Drosophila subgenus
CG11692	X:1862	551	not annotated in Drosophila subgenus
CG1835	X:1864	551	not annotated in Drosophila subgenus
CG1338	X:1864	551	not annotated in Drosophila subgenus
CG1324	X:1866	551	not annotated in Drosophila subgenus
CG32507	X:1868	551	not annotated in Drosophila subgenus
CG1314	X:1871	551	not annotated in Drosophila subgenus
CG11235	X:1872	551	not annotated in Drosophila subgenus
CG32509	X:1874	551	not annotated in Drosophila subgenus
CG11230	X:1875	551	not annotated in Drosophila subgenus
CG11666	X:1881	551	not annotated in Drosophila subgenus
CG1529	X:1884		more complex explanation
CG1740	X:1885		not annotated in Drosophila subgenus
CG15449	X:1886		not annotated in Drosophila subgenus
CG1742	X:1887		not annotated in Drosophila subgenus
CG32510	X:1887		not annotated in Drosophila subgenus
CG1753	X:1888		more complex explanation
CG10987	X:1890	553	not annotated in Drosophila subgenus
CG15446	X:1891	553	not annotated in Drosophila subgenus
CG1503	X:1891	553	not annotated in Drosophila subgenus
CG32511	X:1895		not annotated in Drosophila subgenus
CG14579	X:1896		not annotated in Drosophila subgenus
CG1724	X:1897		not annotated in Drosophila subgenus
CG32523	X:1898	555	not annotated in Drosophila subgenus
CG14580	X:1898	555	not annotated in Drosophila subgenus
CG1722	X:1898	555	not annotated in Drosophila subgenus
CG14581	X:1898	555	not annotated in Drosophila subgenus
CG1666	X:1913		more complex explanation
CG1678	X:1916	561	not annotated in Drosophila subgenus
CG34019	X:1917	561	not annotated in Drosophila subgenus
CG10918	X:1918	561	not annotated in Drosophila subgenus
CG14584	X:1922		not annotated in Drosophila subgenus
CG1644	X:1923		not annotated in Drosophila subgenus
CG32822	X:1924		not annotated in Drosophila subgenus
CG33502	X:1927		not annotated in Drosophila subgenus
CG32820	X:1928		not annotated in Drosophila subgenus
CG32857	X:1929		not annotated in Drosophila subgenus
CG32819	X:1930		not annotated in Drosophila subgenus
CG32500	X:1931		outside of SB and not annotated in dpse, dwil, dvir
CG17686	X:1932		outside of SB and not annotated in dana, dwil, dvir
CG14621	X:1933		outside of SB and not annotated in dwil
CG14615	X:1934		outside of SB and not annotated in dwil
CG14618	X:1939	565	more complex explanation
CG17601	X:1944		outside of SB and not annotated in dpse, dwil, dmoj, dgri
CG32499	X:1945		outside of SB and not annotated in dwil, dmoj, dgri
CG12446	X:1946		outside of SB and not annotated in dwil, dmoj, dgri
CG9559	X:1947		outside of SB and not annotated in dwil, dmoj, dgri
CG11023	2L:0001		not annotated in Drosophila subgenus
CG2657	2L:0003		more complex explanation
CG31973	2L:0004		outside of SB and not assembled in dwil
CG11371	2L:0005		outside of SB and not assembled in dwil
CG11372	2L:0006		outside of SB and not assembled in dwil
CG11374	2L:0007		outside of SB and not assembled in dwil
CG11450	2L:0008		outside of SB and not assembled in dwil
CG11376	2L:0009		outside of SB and not assembled in dwil
CG13694	2L:0012		not annotated in Drosophila subgenus
CG3645	2L:0031		outside of SB and not assembled in dwil
CG17075	2L:0031		outside of SB and not assembled in dwil
CG3345	2L:0031		outside of SB and not assembled in dwil
CG11604	2L:0032		outside of SB and not assembled in dwil
CG11555	2L:0032		outside of SB and not assembled in dwil
CG17078	2L:0033		outside of SB and not assembled in dwil
CG11601	2L:0034	575	not annotated in Drosophila subgenus
CG13689	2L:0073		not annotated in Drosophila subgenus
CG13686	2L:0074		not annotated in Drosophila subgenus
CG2826	2L:0075		not annotated in Drosophila subgenus
CG2839	2L:0076		not annotated in Drosophila subgenus
CG2830	2L:0078	588	not annotated in Drosophila subgenus
CG12506	2L:0081	588	not annotated in Drosophila subgenus
CG13946	2L:0082	588	not annotated in Drosophila subgenus
CG13947	2L:0083	588	not annotated in Drosophila subgenus
CG31658	2L:0086		not annotated in Drosophila subgenus
CG11297	2L:0102	592	not annotated in Drosophila subgenus
CG4178	2L:0103	592	not annotated in Drosophila subgenus
CG31923	2L:0105	592	not annotated in Drosophila subgenus
CG4375	2L:0106	593	not annotated in Drosophila subgenus
CG34016	2L:0109	595	not annotated in Drosophila subgenus
CG4715	2L:0114	596	not annotated in Drosophila subgenus
CG5126	2L:0125	598	more complex explanation
CG5011	2L:0129	598	not annotated in Drosophila subgenus
CG14343	2L:0131	598	not annotated in Drosophila subgenus
CG5156	2L:0132	598	not annotated in Drosophila subgenus
CG5440	2L:0136	598	not annotated in Drosophila subgenus
CG33923	2L:0137	598	not annotated in Drosophila subgenus
CG33922	2L:0138	598	not annotated in Drosophila subgenus
CG31924	2L:0141	598	not annotated in Drosophila subgenus
CG31925	2L:0147	598	not annotated in Drosophila subgenus
CG31926	2L:0150	598	not annotated in Drosophila subgenus
CG31661	2L:0151	598	not annotated in Drosophila subgenus
CG18132	2L:0154		not annotated in Drosophila subgenus
CG10869	2L:0158	599	more complex explanation
CG14352	2L:0159	599	not annotated in Drosophila subgenus
CG31934	2L:0161	600	not annotated in Drosophila subgenus
CG31932	2L:0172	604	not annotated in Drosophila subgenus
CG17650	2L:0173	604	not annotated in Drosophila subgenus
CG31936	2L:0174	604	not annotated in Drosophila subgenus
CG31929	2L:0175	604	not annotated in Drosophila subgenus
CG31931	2L:0176	604	not annotated in Drosophila subgenus
CG31933	2L:0178	604	not annotated in Drosophila subgenus
CG31664	2L:0179	604	not annotated in Drosophila subgenus
CG15358	2L:0183	604	not annotated in Drosophila subgenus
CG15357	2L:0185		not annotated in Drosophila subgenus
CG31941	2L:0193		not annotated in Drosophila subgenus
CG31672	2L:0200	608	not annotated in Drosophila subgenus
CG4259	2L:0203		not annotated in Drosophila subgenus
CG15383	2L:0209	612	not annotated in Drosophila subgenus
CG31668	2L:0211	612	not annotated in Drosophila subgenus
CG33124	2L:0212	612	not annotated in Drosophila subgenus
CG31686	2L:0225	615	not annotated in Drosophila subgenus
CG17234	2L:0228	616	not annotated in Drosophila subgenus
CG17012	2L:0229	616	not annotated in Drosophila subgenus
CG34049	2L:0231	616	not annotated in Drosophila subgenus
CG17242	2L:0232	616	not annotated in Drosophila subgenus
CG4271	2L:0233	616	not annotated in Drosophila subgenus
CG31681	2L:0234	616	not annotated in Drosophila subgenus
CG31949	2L:0237	616	not annotated in Drosophila subgenus
CG31948	2L:0251	618	not annotated in Drosophila subgenus
CG3240	2L:0262		more complex explanation
CG15394	2L:0268	620	not annotated in Drosophila subgenus
CG2859	2L:0285	622	not annotated in Drosophila subgenus
CG2964	2L:0290		not annotated in Drosophila subgenus
CG3123	2L:0293	625	not annotated in Drosophila subgenus
CG18557	2L:0298	625	not annotated in Drosophila subgenus
CG3117	2L:0299	625	not annotated in Drosophila subgenus
CG18627	2L:0307	629	more complex explanation
CG3181	2L:0310		outside of SB and not annotated in dwil
CG9641	2L:0312	632	not annotated in Drosophila subgenus
CG9643	2L:0314		outside of SB and not annotated in dgri
CG17224	2L:0319	635	not annotated in Drosophila subgenus
CG17223	2L:0320	635	more complex explanation
CG17261	2L:0329		not annotated in Drosophila subgenus
CG8822	2L:0332	641	not annotated in Drosophila subgenus
CG15403	2L:0332	641	not annotated in Drosophila subgenus
CG31953	2L:0336		not annotated in Drosophila subgenus
CG18555	2L:0338		not annotated in Drosophila subgenus
CG3485	2L:0339		not annotated in Drosophila subgenus
CG31698	2L:0340		not annotated in Drosophila subgenus
CG15404	2L:0341		not annotated in Drosophila subgenus
CG8829	2L:0342		not annotated in Drosophila subgenus
CG15405	2L:0343		not annotated in Drosophila subgenus
CG3347	2L:0344		not annotated in Drosophila subgenus
CG3332	2L:0345		not annotated in Drosophila subgenus
CG9664	2L:0346		outside of SB and not annotated in dwil
CG9663	2L:0347		outside of SB and not annotated in dwil
CG8838	2L:0357	645	not annotated in Drosophila subgenus
CG15411	2L:0359		not annotated in Drosophila subgenus
CG8840	2L:0363	647	not annotated in Drosophila subgenus
CG31952	2L:0363	647	not annotated in Drosophila subgenus
CG31776	2L:0372	650	not annotated in Drosophila subgenus
CG31956	2L:0373	650	not annotated in Drosophila subgenus
CG3212	2L:0382	651	not annotated in Drosophila subgenus
CG31955	2L:0403	652	not annotated in Drosophila subgenus
CG3410	2L:0405	652	not annotated in Drosophila subgenus
CG31960	2L:0411		not annotated in Drosophila subgenus
CG31958	2L:0412		not annotated in Drosophila subgenus
CG3920	2L:0414		outside of SB and not assembled in dgri
CG4099	2L:0428	655	not annotated in Drosophila subgenus
CG2955	2L:0429	655	not annotated in Drosophila subgenus
CG2958	2L:0432	655	not annotated in Drosophila subgenus
CG3675	2L:0438	658	not annotated in Drosophila subgenus
CG12677	2L:0451	663	not annotated in Drosophila subgenus
CG15433	2L:0454	664	more complex explanation
CG15436	2L:0462		not annotated in Drosophila subgenus
CG15636	2L:0464	671	not annotated in Drosophila subgenus
CG15635	2L:0465	671	not annotated in Drosophila subgenus
CG15632	2L:0470	671	more complex explanation
CG3047	2L:0494		not annotated in Drosophila subgenus
CG8871	2L:0497		not annotated in Drosophila subgenus
CG8869	2L:0498		not annotated in Drosophila subgenus
CG8867	2L:0499		not annotated in Drosophila subgenus
CG31917	2L:0512		outside of SB and not assembled in dwil
CG31918	2L:0520	691	not annotated in Drosophila subgenus
CG6081	2L:0530		not annotated in Drosophila subgenus
CG10833	2L:0531		not annotated in Drosophila subgenus
CG7742	2L:0531		outside of SB and not annotated in dgri and not assembled in dwil
CG14034	2L:0532		outside of SB and not annotated in dpse, dwil, dmoj, dgri
CG6514	2L:0533		outside of SB and not assembled in dwil, dvir, dmoj
CG14026	2L:0533		outside of SB and not assembled in dwil
CG14033	2L:0533		not annotated in Drosophila subgenus
CG14032	2L:0534		outside of SB and not annotated in dwil, dvir, dmoj
CG17970	2L:0535		not annotated in Drosophila subgenus
CG14031	2L:0536		not annotated in Drosophila subgenus
CG14027	2L:0543	698	not annotated in Drosophila subgenus
CG31647	2L:0548	700	not annotated in Drosophila subgenus
CG6907	2L:0553		more complex explanation
CG14017	2L:0561	703	not annotated in Drosophila subgenus
CG31913	2L:0577	705	not annotated in Drosophila subgenus
CG9029	2L:0585	706	not annotated in Drosophila subgenus
CG9024	2L:0586	706	not annotated in Drosophila subgenus
CG8982	2L:0587	706	not annotated in Drosophila subgenus
CG14000	2L:0589	707	not annotated in Drosophila subgenus
CG9016	2L:0590	707	not annotated in Drosophila subgenus
CG9162	2L:0627		not annotated in Drosophila subgenus
CG5972	2L:0631	712	more complex explanation
CG13989	2L:0637	713	not annotated in Drosophila subgenus
CG13988	2L:0638	713	not annotated in Drosophila subgenus
CG9500	2L:0651	713	not annotated in Drosophila subgenus
CG9531	2L:0666		outside of SB and not annotated in dgri
CG34009	2L:0684		not annotated in Drosophila subgenus
CG11053	2L:0685		not annotated in Drosophila subgenus
CG31634	2L:0686		outside of SB and not annotated in dmoj
CG31633	2L:0689		not annotated in Drosophila subgenus
CG13771	2L:0692		outside of SB and not annotated in dwil
CG11322	2L:0704	725	not annotated in Drosophila subgenus
CG17376	2L:0709		not annotated in Drosophila subgenus
CG32828	2L:0713	726	not annotated in Drosophila subgenus
CG10354	2L:0720	727	more complex explanation
CG31907	2L:0742	735	not annotated in Drosophila subgenus
CG31909	2L:0756	737	not annotated in Drosophila subgenus
CG13785	2L:0757	737	not annotated in Drosophila subgenus
CG15818	2L:0768	738	not annotated in Drosophila subgenus
CG6641	2L:0779		not annotated in Drosophila subgenus
CG6717	2L:0783	741	not annotated in Drosophila subgenus
CG6730	2L:0784	741	not annotated in Drosophila subgenus
CG33296	2L:0792	744	not annotated in Drosophila subgenus
CG13793	2L:0793	744	not annotated in Drosophila subgenus
CG13794	2L:0794	744	not annotated in Drosophila subgenus
CG13795	2L:0795	744	not annotated in Drosophila subgenus
CG7171	2L:0805		outside of SB and not annotated in dvir, dgri
CG7106	2L:0819	751	not annotated in Drosophila subgenus
CG31902	2L:0824	751	not annotated in Drosophila subgenus
CG33121	2L:0825	751	not annotated in Drosophila subgenus
CG14532	2L:0827	751	not annotated in Drosophila subgenus
CG7224	2L:0832		outside of SB and not annotated in dwil
CG7221	2L:0832		outside of SB and not annotated in dwil
CG7219	2L:0833		outside of SB and not annotated in dwil
CG12560	2L:0834		outside of SB and not annotated in dwil
CG34010	2L:0835		outside of SB and not annotated in dwil
CG18780	2L:0842	756	more complex explanation
CG8673	2L:0847		not annotated in Drosophila subgenus
CG12375	2L:0847		outside of SB and not annotated in dpse
CG31606	2L:0849	758	not annotated in Drosophila subgenus
CG8137	2L:0865	763	not annotated in Drosophila subgenus
CG13394	2L:0890	773	not annotated in Drosophila subgenus
CG17797	2L:0891	773	not annotated in Drosophila subgenus
CG17799	2L:0892	773	not annotated in Drosophila subgenus
CG31893	2L:0893	773	not annotated in Drosophila subgenus
CG13385	2L:0895	773	not annotated in Drosophila subgenus
CG31898	2L:0897	774	not annotated in Drosophila subgenus
CG31894	2L:0901	775	not annotated in Drosophila subgenus
CG33194	2L:0910	778	not annotated in Drosophila subgenus
CG13088	2L:0912	778	not annotated in Drosophila subgenus
CG13095	2L:0913	778	not annotated in Drosophila subgenus
CG13091	2L:0918		not annotated in Drosophila subgenus
CG9463	2L:0932	788	not annotated in Drosophila subgenus
CG9465	2L:0933	788	not annotated in Drosophila subgenus
CG9466	2L:0934	788	not annotated in Drosophila subgenus
CG9468	2L:0935	788	not annotated in Drosophila subgenus
CG32988	2L:0939	788	not annotated in Drosophila subgenus
CG9573	2L:0960	791	not annotated in Drosophila subgenus
CG18241	2L:0964	791	not annotated in Drosophila subgenus
CG31887	2L:0967	791	not annotated in Drosophila subgenus
CG17011	2L:0972	791	not annotated in Drosophila subgenus
CG3748	2L:0977		not annotated in Drosophila subgenus
CG13110	2L:0978		not annotated in Drosophila subgenus
CG4438	2L:0982	793	not annotated in Drosophila subgenus
CG33723	2L:0988	794	not annotated in Drosophila subgenus
CG31883	2L:0992	796	not annotated in Drosophila subgenus
CG31709	2L:0999	799	not annotated in Drosophila subgenus
CG31882	2L:1005		not annotated in Drosophila subgenus
CG31710	2L:1010	801	not annotated in Drosophila subgenus
CG4105	2L:1013	801	not annotated in Drosophila subgenus
CG18854	2L:1021	802	not annotated in Drosophila subgenus
CG31880	2L:1024	803	not annotated in Drosophila subgenus
CG33300	2L:1029		not annotated in Drosophila subgenus
CG13130	2L:1047	808	not annotated in Drosophila subgenus
CG31875	2L:1048	808	not annotated in Drosophila subgenus
CG13127	2L:1053	808	not annotated in Drosophila subgenus
CG33301	2L:1055	808	not annotated in Drosophila subgenus
CG13135	2L:1064	808	not annotated in Drosophila subgenus
CG13137	2L:1069	808	not annotated in Drosophila subgenus
CG31874	2L:1070	808	not annotated in Drosophila subgenus
CG5739	2L:1073		not annotated in Drosophila subgenus
CG5734	2L:1074		outside of SB and not annotated in dmoj
CG5731	2L:1075		not annotated in Drosophila subgenus
CG5727	2L:1076		outside of SB and not annotated in dpse and not assembled in dwil
CG4901	2L:1077		not annotated in Drosophila subgenus
CG5722	2L:1078		not annotated in Drosophila subgenus
CG4904	2L:1079		outside of SB and not annotated in dpse, dwil, dgri and not assembled in dvir
CG4908	2L:1080		outside of SB and not annotated in dwil and not assembled in dvir
CG5708	2L:1081		outside of SB and not annotated in dwil, dvir
CG5694	2L:1082		outside of SB and not annotated in dpse
CG4912	2L:1083		not annotated in Drosophila subgenus
CG31720	2L:1084		outside of SB and not annotated in dpse, dwil, dvir, dmoj
CG4916	2L:1085		outside of SB and not annotated in dpse, dwil
CG5686	2L:1086		outside of SB and not annotated in dpse, dwil, dvir
CG5680	2L:1087		outside of SB and not annotated in dpse and not assembled in dwil
CG31717	2L:1088		outside of SB and not assembled in dwil
CG4926	2L:1089		outside of SB and not annotated in dpse, dmoj and not assembled in dwil
CG5676	2L:1089		outside of SB and not annotated in dpse, dwil, dmoj and not assembled in dvir, dgri
CG5671	2L:1090		outside of SB and not annotated in dpse
CG5655	2L:1091		outside of SB and not annotated in dpse and not assembled in dwil
CG18619	2L:1092		outside of SB and not annotated in dpse, dvir and not assembled in dwil
CG4946	2L:1093		outside of SB and not annotated in dpse, dwil, dmoj, dgri
CG4953	2L:1094		outside of SB and not annotated in dpse and not assembled in dwil
CG4957	2L:1095		outside of SB and not annotated in dpse, dwil, dmoj, dgri
CG31873	2L:1096		outside of SB and not annotated in dpse and not assembled in dwil
CG5619	2L:1096		outside of SB and not annotated in dpse and not assembled in dwil, dvir
CG5640	2L:1097		outside of SB and not assembled in dwil
CG34043	2L:1098		not annotated in Drosophila subgenus
CG5604	2L:1099		outside of SB and not annotated in dpse and not assembled in dwil
CG18144	2L:1100		outside of SB and not annotated in dpse, dgri and not assembled in dwil
CG5603	2L:1101		outside of SB and not assembled in dwil
CG13138	2L:1102		outside of SB and not annotated in dpse, dwil, dgri
CG5395	2L:1103		outside of SB and not annotated in dpse, dwil, dmoj, dgri
CG5390	2L:1104		outside of SB and not annotated in dpse, dwil, dgri
CG4968	2L:1105		outside of SB and not annotated in dpse, dmoj and not assembled in dwil
CG5387	2L:1106		outside of SB and not annotated in dpse and not assembled in dwil, dvir
CG5385	2L:1107		outside of SB and not annotated in dpse, dwil, dmoj, dgri
CG5384	2L:1108		outside of SB and not assembled in dwil
CG4972	2L:1109		outside of SB and not annotated in dpse, dmoj and not assembled in dwil, dvir
CG5381	2L:1109		not annotated in Drosophila subgenus
CG4995	2L:1110		outside of SB and not annotated in dpse, dwil, dvir, dmoj
CG5371	2L:1111		outside of SB and not annotated in dpse and not assembled in dwil, dvir
CG5375	2L:1112		not annotated in Drosophila subgenus
CG5037	2L:1113		outside of SB and not annotated in dpse and not assembled in dwil
CG5034	2L:1114		outside of SB and not annotated in dpse, dwil, dvir
CG5029	2L:1115		outside of SB and not annotated in dpse, dwil
CG31715	2L:1116		not annotated in Drosophila subgenus
CG5025	2L:1117		outside of SB and not annotated in dpse, dwil, dvir, dmoj
CG5022	2L:1118		outside of SB and not annotated in dpse, dwil, dvir, dmoj
CG13141	2L:1119		outside of SB and not annotated in dwil, dmoj, dgri
CG5369	2L:1120		outside of SB and not annotated in dpse, dwil, dmoj, dgri
CG5367	2L:1121		not annotated in Drosophila subgenus
CG5045	2L:1122		outside of SB and not annotated in dpse
CG5366	2L:1123		outside of SB and not annotated in dpse
CG5052	2L:1124		not annotated in Drosophila subgenus
CG13139	2L:1125		outside of SB and not annotated in dpse
CG5056	2L:1126		outside of SB and not assembled in dwil
CG33304	2L:1127		outside of SB and not annotated in dwil
CG33303	2L:1128		outside of SB and not annotated in dpse and not assembled in dwil, dvir
CG13140	2L:1129		outside of SB and not annotated in dwil, dvir, dmoj
CG5091	2L:1130		not annotated in Drosophila subgenus
CG5096	2L:1130		outside of SB and not annotated in dpse, dvir
CG5363	2L:1131		outside of SB and not annotated in dpse and not assembled in dwil, dvir
CG5108	2L:1132		outside of SB and not annotated in dpse, dmoj and not assembled in dwil, dvir
CG5102	2L:1133		outside of SB and not annotated in dpse and not assembled in dwil, dvir
CG5362	2L:1134		outside of SB and not annotated in dpse, dwil
CG31716	2L:1135		outside of SB and not annotated in dpse and not assembled in dwil
CG17768	2L:1136		not annotated in Drosophila subgenus
CG33677	2L:1136		outside of SB and not annotated in dpse and not assembled in dwil
CG31718	2L:1137		outside of SB and not annotated in dpse, dmoj, dgri
CG5271	2L:1138		outside of SB and not annotated in dpse and not assembled in dwil
CG5277	2L:1138		outside of SB and not annotated in dpse and not assembled in dwil
CG5355	2L:1139		outside of SB and not annotated in dpse, dwil
CG5300	2L:1140		outside of SB and not annotated in dwil
CG5354	2L:1142		not annotated in Drosophila subgenus
CG5188	2L:1145		outside of SB and not annotated in dpse
CG5343	2L:1145		outside of SB and not annotated in dpse
CG5322	2L:1152	814	not annotated in Drosophila subgenus
CG6144	2L:1157		outside of SB and not assembled in dwil
CG13144	2L:1158		outside of SB and not assembled in dwil
CG7438	2L:1159		outside of SB and not assembled in dwil
CG7363	2L:1166	817	not annotated in Drosophila subgenus
CG17097	2L:1170	817	not annotated in Drosophila subgenus
CG17098	2L:1171	817	not annotated in Drosophila subgenus
CG31871	2L:1172	817	not annotated in Drosophila subgenus
CG17105	2L:1174	817	not annotated in Drosophila subgenus
CG17107	2L:1175	817	not annotated in Drosophila subgenus
CG7296	2L:1177	817	not annotated in Drosophila subgenus
CG7294	2L:1178	817	not annotated in Drosophila subgenus
CG6737	2L:1188		not annotated in Drosophila subgenus
CG18561	2L:1196	822	not annotated in Drosophila subgenus
CG6508	2L:1197	822	not annotated in Drosophila subgenus
CG17134	2L:1197	822	not annotated in Drosophila subgenus
CG6620	2L:1204	823	more complex explanation
CG14072	2L:1212	824	not annotated in Drosophila subgenus
CG4621	2L:1214		more complex explanation
CG16743	2L:1215		not annotated in Drosophila subgenus
CG6093	2L:1216		outside of SB and not annotated in dpse, dmoj
CG6105	2L:1217		outside of SB and not annotated in dpse
CG4636	2L:1218	825	more complex explanation
CG16834	2L:1222	825	not annotated in Drosophila subgenus
CG4579	2L:1224		outside of SB and not annotated in dpse
CG16840	2L:1224		outside of SB and not annotated in dpse
CG4584	2L:1225		outside of SB and not assembled in dwil
CG18666	2L:1226	826	not annotated in Drosophila subgenus
CG14914	2L:1227	826	not annotated in Drosophila subgenus
CG6392	2L:1247	830	not annotated in Drosophila subgenus
CG14926	2L:1252	830	not annotated in Drosophila subgenus
CG4922	2L:1255	830	not annotated in Drosophila subgenus
CG14928	2L:1257		outside of SB and not assembled in dwil
CG6509	2L:1258		outside of SB and not assembled in dwil
CG4970	2L:1259		not annotated in Drosophila subgenus
CG14929	2L:1259		not annotated in Drosophila subgenus
CG14930	2L:1259		not annotated in Drosophila subgenus
CG6541	2L:1262	831	not annotated in Drosophila subgenus
CG15841	2L:1263	831	not annotated in Drosophila subgenus
CG6555	2L:1263	831	not annotated in Drosophila subgenus
CG6589	2L:1264	831	not annotated in Drosophila subgenus
CG12307	2L:1267	831	not annotated in Drosophila subgenus
CG4988	2L:1269	831	not annotated in Drosophila subgenus
CG14932	2L:1272	832	not annotated in Drosophila subgenus
CG16960	2L:1280	834	not annotated in Drosophila subgenus
CG16961	2L:1281	834	not annotated in Drosophila subgenus
CG16964	2L:1284		not annotated in Drosophila subgenus
CG17745	2L:1285		not annotated in Drosophila subgenus
CG31864	2L:1293	837	not annotated in Drosophila subgenus
CG31865	2L:1294	837	not annotated in Drosophila subgenus
CG14945	2L:1304		outside of SB and not assembled in dwil
CG12317	2L:1304		outside of SB and not assembled in dwil
CG5317	2L:1305		outside of SB and not assembled in dwil
CG7061	2L:1306		outside of SB and not assembled in dwil
CG14946	2L:1307		outside of SB and not assembled in dwil
CG14947	2L:1308		outside of SB and not assembled in dwil
CG6716	2L:1309		outside of SB and not assembled in dwil
CG5325	2L:1310		outside of SB and not assembled in dwil
CG6712	2L:1310		outside of SB and not assembled in dwil
CG10692	2L:1311		outside of SB and not assembled in dwil
CG5336	2L:1312		outside of SB and not assembled in dwil
CG6618	2L:1312		outside of SB and not assembled in dwil
CG5353	2L:1313		outside of SB and not assembled in dwil
CG6601	2L:1314		outside of SB and not assembled in dwil
CG16996	2L:1315		outside of SB and not assembled in dwil
CG16997	2L:1316		not annotated in Drosophila subgenus
CG31861	2L:1320	843	not annotated in Drosophila subgenus
CG31759	2L:1324	845	more complex explanation
CG31862	2L:1325	845	more complex explanation
CG17010	2L:1326	845	not annotated in Drosophila subgenus
CG15494	2L:1332	846	not annotated in Drosophila subgenus
CG5418	2L:1338	846	not annotated in Drosophila subgenus
CG17024	2L:1339	846	not annotated in Drosophila subgenus
CG31859	2L:1342	846	not annotated in Drosophila subgenus
CG17031	2L:1343	846	not annotated in Drosophila subgenus
CG15488	2L:1344	846	not annotated in Drosophila subgenus
CG6153	2L:1348	847	not annotated in Drosophila subgenus
CG15484	2L:1353	850	not annotated in Drosophila subgenus
CG5983	2L:1360	852	not annotated in Drosophila subgenus
CG17174	2L:1361	852	not annotated in Drosophila subgenus
CG17176	2L:1362	852	not annotated in Drosophila subgenus
CG17178	2L:1363	852	not annotated in Drosophila subgenus
CG31856	2L:1373	852	not annotated in Drosophila subgenus
CG5142	2L:1374	852	more complex explanation
CG5122	2L:1375	852	not annotated in Drosophila subgenus
CG9928	2L:1376	852	not annotated in Drosophila subgenus
CG16978	2L:1377	852	not annotated in Drosophila subgenus
CG9431	2L:1388		not annotated in Drosophila subgenus
CG5648	2L:1395	856	not annotated in Drosophila subgenus
CG10859	2L:1425	863	not annotated in Drosophila subgenus
CG16954	2L:1432	863	not annotated in Drosophila subgenus
CG31846	2L:1434	863	not annotated in Drosophila subgenus
CG9254	2L:1437	865	not annotated in Drosophila subgenus
CG31845	2L:1445	866	not annotated in Drosophila subgenus
CG16888	2L:1452		not annotated in Drosophila subgenus
CG16870	2L:1463		not annotated in Drosophila subgenus
CG31770	2L:1471	872	not annotated in Drosophila subgenus
CG8864	2L:1473	872	not annotated in Drosophila subgenus
CG33681	2L:1476	872	not annotated in Drosophila subgenus
CG31840	2L:1477	872	not annotated in Drosophila subgenus
CG31771	2L:1480	872	not annotated in Drosophila subgenus
CG32973	2L:1483	872	not annotated in Drosophila subgenus
CG31769	2L:1486	872	not annotated in Drosophila subgenus
CG15292	2L:1487	872	not annotated in Drosophila subgenus
CG32971	2L:1491	872	not annotated in Drosophila subgenus
CG18125	2L:1494	874	not annotated in Drosophila subgenus
CG3478	2L:1501		not annotated in Drosophila subgenus
CG33648	2L:1507	876	not annotated in Drosophila subgenus
CG3473	2L:1509		not annotated in Drosophila subgenus
CG15282	2L:1511		outside of SB and not annotated in dmoj, dgri
CG12636	2L:1512		not annotated in Drosophila subgenus
CG33482	2L:1513		not annotated in Drosophila subgenus
CG15281	2L:1516		not annotated in Drosophila subgenus
CG4691	2L:1517		not annotated in Drosophila subgenus
CG4650	2L:1520		not annotated in Drosophila subgenus
CG18636	2L:1521		not annotated in Drosophila subgenus
CG18420	2L:1522		not annotated in Drosophila subgenus
CG33309	2L:1524	880	not annotated in Drosophila subgenus
CG3491	2L:1531	881	not annotated in Drosophila subgenus
CG31834	2L:1533	881	not annotated in Drosophila subgenus
CG31832	2L:1539	883	not annotated in Drosophila subgenus
CG33679	2L:1543		not annotated in Drosophila subgenus
CG15267	2L:1551		not annotated in Drosophila subgenus
CG3975	2L:1551		not annotated in Drosophila subgenus
CG31829	2L:1554	886	not annotated in Drosophila subgenus
CG15263	2L:1556	886	not annotated in Drosophila subgenus
CG31830	2L:1557	886	not annotated in Drosophila subgenus
CG15260	2L:1558	886	not annotated in Drosophila subgenus
CG31733	2L:1559	886	not annotated in Drosophila subgenus
CG31828	2L:1564	886	not annotated in Drosophila subgenus
CG31825	2L:1582	890	not annotated in Drosophila subgenus
CG18477	2L:1583	890	not annotated in Drosophila subgenus
CG18478	2L:1584	890	not annotated in Drosophila subgenus
CG33311	2L:1585	890	not annotated in Drosophila subgenus
CG31780	2L:1586	890	not annotated in Drosophila subgenus
CG31827	2L:1587	890	not annotated in Drosophila subgenus
CG4148	2L:1593	891	not annotated in Drosophila subgenus
CG18109	2L:1595		outside of SB and not annotated in dere
CG18518	2L:1596		not annotated in Drosophila subgenus
CG31822	2L:1597		outside of SB and not annotated in dana, dpse, dwil, dmoj
CG7653	2L:1600	892	not annotated in Drosophila subgenus
CG18096	2L:1602	892	not annotated in Drosophila subgenus
CG13244	2L:1606	892	not annotated in Drosophila subgenus
CG31819	2L:1616	895	not annotated in Drosophila subgenus
CG17329	2L:1623	899	not annotated in Drosophila subgenus
CG4440	2L:1633		not annotated in Drosophila subgenus
CG31817	2L:1634		outside of SB and not annotated in dmoj, dgri
CG31818	2L:1635		outside of SB and not annotated in dmoj, dgri
CG31737	2L:1636		not annotated in Drosophila subgenus
CG4580	2L:1644		not annotated in Drosophila subgenus
CG4694	2L:1654		not annotated in Drosophila subgenus
CG31807	2L:1655	905	not annotated in Drosophila subgenus
CG33552	2L:1655	905	not annotated in Drosophila subgenus
CG31782	2L:1655	905	not annotated in Drosophila subgenus
CG33312	2L:1669	909	not annotated in Drosophila subgenus
CG31810	2L:1674	911	not annotated in Drosophila subgenus
CG31781	2L:1677		not annotated in Drosophila subgenus
CG31805	2L:1682	914	not annotated in Drosophila subgenus
CG12288	2L:1683	914	more complex explanation
CG6291	2L:1685	914	not annotated in Drosophila subgenus
CG15136	2L:1689		not annotated in Drosophila subgenus
CG12620	2L:1690		not annotated in Drosophila subgenus
CG31747	2L:1693	915	not annotated in Drosophila subgenus
CG31744	2L:1694	915	not annotated in Drosophila subgenus
CG31748	2L:1695	915	not annotated in Drosophila subgenus
CG31750	2L:1696	915	not annotated in Drosophila subgenus
CG31745	2L:1697	915	not annotated in Drosophila subgenus
CG31804	2L:1699		not annotated in Drosophila subgenus
CG33928	2L:1704	917	not annotated in Drosophila subgenus
CG6639	2L:1706	917	not annotated in Drosophila subgenus
CG18563	2L:1706	917	not annotated in Drosophila subgenus
CG15144	2L:1718	921	not annotated in Drosophila subgenus
CG15145	2L:1719	921	not annotated in Drosophila subgenus
CG5681	2L:1728	921	not annotated in Drosophila subgenus
CG31742	2L:1729	921	not annotated in Drosophila subgenus
CG5693	2L:1730	921	not annotated in Drosophila subgenus
CG15149	2L:1731	921	not annotated in Drosophila subgenus
CG15150	2L:1733	921	not annotated in Drosophila subgenus
CG5755	2L:1739	921	not annotated in Drosophila subgenus
CG17681	2L:1744		outside of SB and not annotated in dana
CG15155	2L:1745		outside of SB and not annotated in dana
CG31788	2L:1751	925	not annotated in Drosophila subgenus
CG31749	2L:1754	925	not annotated in Drosophila subgenus
CG10174	2L:1758		not annotated in Drosophila subgenus
CG31789	2L:1768	928	not annotated in Drosophila subgenus
CG31801	2L:1775		not annotated in Drosophila subgenus
CG15166	2L:1787	934	not annotated in Drosophila subgenus
CG31752	2L:1797		outside of SB and not annotated in dpse, dgri
CG10603	2L:1800	937	not annotated in Drosophila subgenus
CG15169	2L:1813	940	not annotated in Drosophila subgenus
CG31792	2L:1815		not annotated in Drosophila subgenus
CG31793	2L:1816		outside of SB and not annotated in dwil
CG10652	2L:1817		outside of SB and not annotated in dana, dpse
CG15171	2L:1818		not annotated in Drosophila subgenus
CG15172	2L:1819		not annotated in Drosophila subgenus
CG17492	2L:1822	942	more complex explanation
CG10700	2L:1833		not annotated in Drosophila subgenus
CG17568	2L:1844	949	not annotated in Drosophila subgenus
CG17567	2L:1845	949	not annotated in Drosophila subgenus
CG31797	2L:1849	949	not annotated in Drosophila subgenus
CG31796	2L:1850	949	not annotated in Drosophila subgenus
CG31798	2L:1859	949	more complex explanation
CG33532	2L:1860	949	not annotated in Drosophila subgenus
CG16771	2L:1861	949	more complex explanation
CG31699	2L:1866	951	not annotated in Drosophila subgenus
CG13079	2L:1886		not annotated in Drosophila subgenus
CG13962	2L:1905		not annotated in Drosophila subgenus
CG31691	2L:1907	961	not annotated in Drosophila subgenus
CG33117	2L:1907	961	not annotated in Drosophila subgenus
CG34051	2L:1910	961	not annotated in Drosophila subgenus
CG10680	2L:1913	961	not annotated in Drosophila subgenus
CG12508	2L:1916	961	not annotated in Drosophila subgenus
CG10659	2L:1918		not annotated in Drosophila subgenus
CG10730	2L:1922	963	not annotated in Drosophila subgenus
CG10651	2L:1929		not annotated in Drosophila subgenus
CG41071	2L:1930		not annotated in Drosophila subgenus
CG40463	2L:1930		not annotated in Drosophila subgenus
CG41073	2L:1931		not annotated in Drosophila subgenus
CG40169	2L:1932		outside of SB and not annotated in dmoj
CG40172	2L:1932		not annotated in Drosophila subgenus
CG40341	2L:1932		not annotated in Drosophila subgenus
CG17571	2L:1933		outside of SB and not annotated in dpse, dmoj
CG41072	2L:1934		not annotated in Drosophila subgenus
CG40174	2L:1934		not annotated in Drosophila subgenus
CG17570	2L:1935		outside of SB and not annotated in dpse, dmoj
CG40175	2L:1936		not annotated in Drosophila subgenus
CG40176	2L:1937		not annotated in Drosophila subgenus
CG11012	2L:1941	969	not annotated in Drosophila subgenus
CG11019	2L:1947	970	not annotated in Drosophila subgenus
CG18858	2L:1951		not annotated in Drosophila subgenus
CG2508	2L:1952		not annotated in Drosophila subgenus
CG2493	2L:1952		outside of SB and not annotated in dgri
CG34007	2L:1953		not annotated in Drosophila subgenus
CG15476	2L:1954		not annotated in Drosophila subgenus
CG15477	2L:1955		not annotated in Drosophila subgenus
CG31677	2L:1956		not annotated in Drosophila subgenus
CG15475	2L:1957		not annotated in Drosophila subgenus
CG17472	2L:1958		not annotated in Drosophila subgenus
CG31680	2L:1959		not annotated in Drosophila subgenus
CG18810	2L:1963	971	not annotated in Drosophila subgenus
CG1962	2L:1966	972	more complex explanation
CG33321	2L:1980	980	not annotated in Drosophila subgenus
CG33320	2L:1981	980	not annotated in Drosophila subgenus
CG14405	2L:1982	980	not annotated in Drosophila subgenus
CG9334	2L:1987	981	not annotated in Drosophila subgenus
CG14402	2L:1989	981	not annotated in Drosophila subgenus
CG14400	2L:1990	981	not annotated in Drosophila subgenus
CG33317	2L:1996	981	not annotated in Drosophila subgenus
CG9272	2L:1999		more complex explanation
CG9270	2L:2000		not annotated in Drosophila subgenus
CG9266	2L:2001		not annotated in Drosophila subgenus
CG9253	2L:2013		outside of SB and not assembled in dwil
CG9252	2L:2013		outside of SB and not assembled in dwil
CG1071	2L:2014		outside of SB and not assembled in dwil
CG9250	2L:2015		outside of SB and not assembled in dwil
CG9249	2L:2015		outside of SB and not assembled in dwil
CG9248	2L:2016		outside of SB and not assembled in dwil
CG9247	2L:2016		outside of SB and not assembled in dwil
CG9246	2L:2017		outside of SB and not assembled in dwil
CG9243	2L:2017		outside of SB and not assembled in dwil
CG9244	2L:2018		outside of SB and not assembled in dwil
CG31627	2L:2019		outside of SB and not assembled in dwil
CG9242	2L:2020		outside of SB and not assembled in dwil
CG9241	2L:2021		outside of SB and not assembled in dwil
CG14396	2L:2021		outside of SB and not assembled in dwil
CG31624	2L:2022		outside of SB and not annotated in dere, dyak and not assembled in dwil
CG31988	2L:2023		not annotated in Drosophila subgenus
CG2042	2L:2034	990	not annotated in Drosophila subgenus
CG33801	2L:2039		not annotated in Drosophila subgenus
CG33910	2L:2040		not annotated in Drosophila subgenus
CG33909	2L:2041		not annotated in Drosophila subgenus
CG33803	2L:2042		not annotated in Drosophila subgenus
CG31617	2L:2043		not annotated in Drosophila subgenus
CG17949	2L:2044		not annotated in Drosophila subgenus
CG31618	2L:2045		not annotated in Drosophila subgenus
CG31611	2L:2046		not annotated in Drosophila subgenus
CG31613	2L:2047		not annotated in Drosophila subgenus
CG33804	2L:2048		not annotated in Drosophila subgenus
CG33908	2L:2049		not annotated in Drosophila subgenus
CG33907	2L:2050		not annotated in Drosophila subgenus
CG33806	2L:2051		not annotated in Drosophila subgenus
CG33807	2L:2052		not annotated in Drosophila subgenus
CG33906	2L:2053		not annotated in Drosophila subgenus
CG33808	2L:2054		not annotated in Drosophila subgenus
CG33905	2L:2055		not annotated in Drosophila subgenus
CG33809	2L:2056		not annotated in Drosophila subgenus
CG33810	2L:2057		not annotated in Drosophila subgenus
CG33904	2L:2058		not annotated in Drosophila subgenus
CG33903	2L:2059		not annotated in Drosophila subgenus
CG33812	2L:2060		not annotated in Drosophila subgenus
CG33813	2L:2061		not annotated in Drosophila subgenus
CG33902	2L:2062		not annotated in Drosophila subgenus
CG33814	2L:2063		not annotated in Drosophila subgenus
CG33901	2L:2064		not annotated in Drosophila subgenus
CG33815	2L:2065		not annotated in Drosophila subgenus
CG33816	2L:2066		not annotated in Drosophila subgenus
CG33900	2L:2067		not annotated in Drosophila subgenus
CG33817	2L:2068		not annotated in Drosophila subgenus
CG33899	2L:2069		not annotated in Drosophila subgenus
CG33818	2L:2070		not annotated in Drosophila subgenus
CG33819	2L:2071		not annotated in Drosophila subgenus
CG33898	2L:2072		not annotated in Drosophila subgenus
CG33820	2L:2073		not annotated in Drosophila subgenus
CG33897	2L:2074		not annotated in Drosophila subgenus
CG33821	2L:2075		not annotated in Drosophila subgenus
CG33822	2L:2076		not annotated in Drosophila subgenus
CG33896	2L:2077		not annotated in Drosophila subgenus
CG33823	2L:2078		not annotated in Drosophila subgenus
CG33895	2L:2079		not annotated in Drosophila subgenus
CG33824	2L:2080		not annotated in Drosophila subgenus
CG33825	2L:2081		not annotated in Drosophila subgenus
CG33894	2L:2082		not annotated in Drosophila subgenus
CG33826	2L:2083		not annotated in Drosophila subgenus
CG33893	2L:2084		not annotated in Drosophila subgenus
CG33827	2L:2085		not annotated in Drosophila subgenus
CG33828	2L:2086		not annotated in Drosophila subgenus
CG33892	2L:2087		not annotated in Drosophila subgenus
CG33829	2L:2088		not annotated in Drosophila subgenus
CG33891	2L:2089		not annotated in Drosophila subgenus
CG33830	2L:2090		not annotated in Drosophila subgenus
CG33831	2L:2091		not annotated in Drosophila subgenus
CG33890	2L:2092		not annotated in Drosophila subgenus
CG33832	2L:2093		not annotated in Drosophila subgenus
CG33889	2L:2094		not annotated in Drosophila subgenus
CG33833	2L:2095		not annotated in Drosophila subgenus
CG33834	2L:2096		not annotated in Drosophila subgenus
CG33888	2L:2097		not annotated in Drosophila subgenus
CG33835	2L:2098		not annotated in Drosophila subgenus
CG33887	2L:2099		not annotated in Drosophila subgenus
CG33836	2L:2100		not annotated in Drosophila subgenus
CG33837	2L:2101		not annotated in Drosophila subgenus
CG33886	2L:2102		not annotated in Drosophila subgenus
CG33838	2L:2103		not annotated in Drosophila subgenus
CG33885	2L:2104		not annotated in Drosophila subgenus
CG33839	2L:2105		not annotated in Drosophila subgenus
CG33840	2L:2106		not annotated in Drosophila subgenus
CG33884	2L:2107		not annotated in Drosophila subgenus
CG33841	2L:2108		not annotated in Drosophila subgenus
CG33883	2L:2109		not annotated in Drosophila subgenus
CG33842	2L:2110		not annotated in Drosophila subgenus
CG33843	2L:2111		not annotated in Drosophila subgenus
CG33882	2L:2112		not annotated in Drosophila subgenus
CG33844	2L:2113		not annotated in Drosophila subgenus
CG33881	2L:2114		not annotated in Drosophila subgenus
CG33845	2L:2115		not annotated in Drosophila subgenus
CG33846	2L:2116		not annotated in Drosophila subgenus
CG33880	2L:2117		not annotated in Drosophila subgenus
CG33847	2L:2118		not annotated in Drosophila subgenus
CG33879	2L:2119		not annotated in Drosophila subgenus
CG33848	2L:2120		not annotated in Drosophila subgenus
CG33849	2L:2121		not annotated in Drosophila subgenus
CG33878	2L:2122		not annotated in Drosophila subgenus
CG33850	2L:2123		not annotated in Drosophila subgenus
CG33877	2L:2124		not annotated in Drosophila subgenus
CG33851	2L:2125		not annotated in Drosophila subgenus
CG33852	2L:2126		not annotated in Drosophila subgenus
CG33876	2L:2127		not annotated in Drosophila subgenus
CG33853	2L:2128		not annotated in Drosophila subgenus
CG33875	2L:2129		not annotated in Drosophila subgenus
CG33854	2L:2130		not annotated in Drosophila subgenus
CG33855	2L:2131		not annotated in Drosophila subgenus
CG33874	2L:2132		not annotated in Drosophila subgenus
CG33856	2L:2133		not annotated in Drosophila subgenus
CG33873	2L:2134		not annotated in Drosophila subgenus
CG33857	2L:2135		not annotated in Drosophila subgenus
CG33858	2L:2136		not annotated in Drosophila subgenus
CG33872	2L:2137		not annotated in Drosophila subgenus
CG33859	2L:2138		not annotated in Drosophila subgenus
CG33871	2L:2139		not annotated in Drosophila subgenus
CG33860	2L:2140		not annotated in Drosophila subgenus
CG33861	2L:2141		not annotated in Drosophila subgenus
CG33870	2L:2142		not annotated in Drosophila subgenus
CG33862	2L:2143		not annotated in Drosophila subgenus
CG33869	2L:2144		not annotated in Drosophila subgenus
CG33863	2L:2145		not annotated in Drosophila subgenus
CG33864	2L:2146		not annotated in Drosophila subgenus
CG33868	2L:2147		not annotated in Drosophila subgenus
CG33865	2L:2148		not annotated in Drosophila subgenus
CG33866	2L:2149		not annotated in Drosophila subgenus
CG11630	2L:2161	996	not annotated in Drosophila subgenus
CG31600	2L:2166	996	not annotated in Drosophila subgenus
CG2528	2L:2168	996	not annotated in Drosophila subgenus
CG31693	2L:2169	996	not annotated in Drosophila subgenus
CG31700	2L:2172	996	not annotated in Drosophila subgenus
CG31703	2L:2175	996	not annotated in Drosophila subgenus
CG10834	2L:2177	996	not annotated in Drosophila subgenus
CG3635	2L:2184		not annotated in Drosophila subgenus
CG3262	2L:2187		not annotated in Drosophila subgenus
CG12775	2L:2188		outside of SB and not annotated in dana
CG3278	2L:2189		outside of SB and not annotated in dana
CG16937	2L:2190		not annotated in Drosophila subgenus
CG17018	2L:2191		outside of SB and not annotated in dyak and not assembled in dana
CG33492	2R:0001		not annotated in Drosophila subgenus
CG2981	2R:0002		not annotated in Drosophila subgenus
CG3107	2R:0003		outside of SB and not annotated in dyak, dgri
CG2944	2R:0004		outside of SB and not annotated in dyak, dpse and not assembled in dana
CG3136	2R:0005		outside of SB and not annotated in dyak, dpse and not assembled in dana
CG33554	2R:0006		not annotated in Drosophila subgenus
CG2682	2R:0007		outside of SB and not annotated in dyak
CG10392	2R:0008		outside of SB and not annotated in dyak, dpse, dgri and not assembled in dana
CG10465	2R:0009		outside of SB and not annotated in dyak, dgri and not assembled in dana
CG10395	2R:0010		outside of SB and not annotated in dyak, dgri and not assembled in dana
CG30441	2R:0010		outside of SB and not annotated in dyak, dgri
CG10396	2R:0011		not annotated in Drosophila subgenus
CG33347	2R:0012		not annotated in Drosophila subgenus
CG10417	2R:0013		outside of SB and not annotated in dyak, dpse, dgri and not assembled in dana
CG30437	2R:0014		outside of SB and not annotated in dyak, dpse, dgri and not assembled in dana
CG32838	2R:0015		outside of SB and not annotated in dyak, dpse, dgri and not assembled in dana
CG30438	2R:0017	1001	more complex explanation
CG12408	2R:0017	1001	not annotated in Drosophila subgenus
CG17510	2R:0018	1001	more complex explanation
CG17508	2R:0019	1001	more complex explanation
CG11665	2R:0020	1001	more complex explanation
CG1344	2R:0021	1001	more complex explanation
CG8426	2R:0022	1001	more complex explanation
CG1294	2R:0023	1001	not annotated in Drosophila subgenus
CG8245	2R:0024	1001	more complex explanation
CG11066	2R:0026		outside of SB and not annotated in dmoj
CG17250	2R:0034	1005	more complex explanation
CG14468	2R:0035	1005	more complex explanation
CG30436	2R:0039	1005	not annotated in Drosophila subgenus
CG12551	2R:0040	1005	not annotated in Drosophila subgenus
CG7882	2R:0042	1005	more complex explanation
CG7863	2R:0048		not annotated in Drosophila subgenus
CG30432	2R:0063	1010	not annotated in Drosophila subgenus
CG8335	2R:0064	1010	not annotated in Drosophila subgenus
CG8330	2R:0068	1011	not annotated in Drosophila subgenus
CG15233	2R:0071	1012	not annotated in Drosophila subgenus
CG15234	2R:0072	1012	not annotated in Drosophila subgenus
CG33919	2R:0074	1012	not annotated in Drosophila subgenus
CG9445	2R:0108	1021	not annotated in Drosophila subgenus
CG9454	2R:0112	1022	not annotated in Drosophila subgenus
CG9455	2R:0113	1022	not annotated in Drosophila subgenus
CG9456	2R:0113	1022	not annotated in Drosophila subgenus
CG33348	2R:0117	1023	not annotated in Drosophila subgenus
CG18816	2R:0121	1024	not annotated in Drosophila subgenus
CG12842	2R:0130	1025	not annotated in Drosophila subgenus
CG4485	2R:0142	1025	not annotated in Drosophila subgenus
CG30385	2R:0150	1025	not annotated in Drosophila subgenus
CG11112	2R:0164	1029	not annotated in Drosophila subgenus
CG11113	2R:0164	1029	not annotated in Drosophila subgenus
CG1701	2R:0165		not annotated in Drosophila subgenus
CG2140	2R:0185	1038	more complex explanation
CG1598	2R:0185	1038	more complex explanation
CG1339	2R:0195	1041	not annotated in Drosophila subgenus
CG1941	2R:0205		not annotated in Drosophila subgenus
CG1942	2R:0206		not annotated in Drosophila subgenus
CG12825	2R:0212		not annotated in Drosophila subgenus
CG12824	2R:0213		not annotated in Drosophila subgenus
CG12055	2R:0214		not annotated in Drosophila subgenus
CG30383	2R:0220		outside of SB and not annotated in dpse, dwil, dgri
CG17853	2R:0230	1051	not annotated in Drosophila subgenus
CG2916	2R:0241	1055	not annotated in Drosophila subgenus
CG11196	2R:0246	1056	not annotated in Drosophila subgenus
CG8721	2R:0249	1056	not annotated in Drosophila subgenus
CG17977	2R:0254	1057	not annotated in Drosophila subgenus
CG17976	2R:0260	1058	not annotated in Drosophila subgenus
CG18316	2R:0264	1059	not annotated in Drosophila subgenus
CG30374	2R:0272		not annotated in Drosophila subgenus
CG8708	2R:0273		not annotated in Drosophila subgenus
CG14756	2R:0279		not annotated in Drosophila subgenus
CG30369	2R:0284	1064	not annotated in Drosophila subgenus
CG14759	2R:0285	1064	not annotated in Drosophila subgenus
CG12126	2R:0287	1064	not annotated in Drosophila subgenus
CG30358	2R:0291	1064	not annotated in Drosophila subgenus
CG30365	2R:0293	1064	not annotated in Drosophila subgenus
CG18449	2R:0298	1064	not annotated in Drosophila subgenus
CG8690	2R:0316	1068	not annotated in Drosophila subgenus
CG14754	2R:0318	1068	not annotated in Drosophila subgenus
CG12780	2R:0319	1068	not annotated in Drosophila subgenus
CG8687	2R:0320	1068	not annotated in Drosophila subgenus
CG8734	2R:0330		outside of SB and not annotated in dana
CG30353	2R:0333	1072	not annotated in Drosophila subgenus
CG30354	2R:0334	1072	more complex explanation
CG30355	2R:0334	1072	not annotated in Drosophila subgenus
CG14744	2R:0340	1073	not annotated in Drosophila subgenus
CG14746	2R:0341	1073	not annotated in Drosophila subgenus
CG30356	2R:0346	1074	not annotated in Drosophila subgenus
CG8746	2R:0348	1074	not annotated in Drosophila subgenus
CG13751	2R:0354	1076	not annotated in Drosophila subgenus
CG11778	2R:0387	1086	not annotated in Drosophila subgenus
CG8781	2R:0394	1089	more complex explanation
CG8788	2R:0399		not annotated in Drosophila subgenus
CG30345	2R:0403	1092	not annotated in Drosophila subgenus
CG13740	2R:0413	1097	not annotated in Drosophila subgenus
CG2063	2R:0417		outside of SB and not assembled in dana
CG1968	2R:0418		outside of SB and not assembled in dana
CG2072	2R:0418		more complex explanation
CG1978	2R:0421	1099	not annotated in Drosophila subgenus
CG12158	2R:0422	1099	not annotated in Drosophila subgenus
CG8799	2R:0424	1099	more complex explanation
CG8800	2R:0425	1099	more complex explanation
CG33774	2R:0427	1100	not annotated in Drosophila subgenus
CG13955	2R:0430		outside of SB and not annotated in dmoj, dgri
CG8806	2R:0431		not annotated in Drosophila subgenus
CG30005	2R:0463	1105	not annotated in Drosophila subgenus
CG30002	2R:0466	1106	not annotated in Drosophila subgenus
CG1773	2R:0467	1106	not annotated in Drosophila subgenus
CG33800	2R:0471	1106	not annotated in Drosophila subgenus
CG34033	2R:0477		outside of SB and not annotated in dmoj, dgri
CG30001	2R:0478		outside of SB and not annotated in dmoj
CG1663	2R:0481		not annotated in Drosophila subgenus
CG18446	2R:0489		not annotated in Drosophila subgenus
CG12744	2R:0490		not annotated in Drosophila subgenus
CG1472	2R:0491		not annotated in Drosophila subgenus
CG1513	2R:0492		not annotated in Drosophila subgenus
CG12923	2R:0492		not annotated in Drosophila subgenus
CG30008	2R:0492		not annotated in Drosophila subgenus
CG30007	2R:0493		outside of SB and not annotated in dpse, dgri
CG12133	2R:0499		outside of SB and not annotated in dpse, dwil, dmoj
CG18445	2R:0507		outside of SB and not annotated in dmoj
CG2292	2R:0510	1118	not annotated in Drosophila subgenus
CG12921	2R:0511	1119	more complex explanation
CG1380	2R:0514		not annotated in Drosophila subgenus
CG2275	2R:0516	1123	more complex explanation
CG12912	2R:0527	1127	not annotated in Drosophila subgenus
CG12907	2R:0538	1128	not annotated in Drosophila subgenus
CG12902	2R:0539	1128	not annotated in Drosophila subgenus
CG12906	2R:0541	1128	not annotated in Drosophila subgenus
CG33477	2R:0545	1128	not annotated in Drosophila subgenus
CG33476	2R:0546	1128	not annotated in Drosophila subgenus
CG33475	2R:0547	1128	not annotated in Drosophila subgenus
CG11765	2R:0549	1128	more complex explanation
CG11825	2R:0550	1128	not annotated in Drosophila subgenus
CG33474	2R:0551	1128	not annotated in Drosophila subgenus
CG30320	2R:0559		not annotated in Drosophila subgenus
CG30018	2R:0574	1134	not annotated in Drosophila subgenus
CG12324	2R:0582	1137	not annotated in Drosophila subgenus
CG30017	2R:0586	1139	not annotated in Drosophila subgenus
CG18004	2R:0590		outside of SB and not annotated in dgri
CG12346	2R:0591	1140	not annotated in Drosophila subgenus
CG13235	2R:0597	1141	not annotated in Drosophila subgenus
CG30490	2R:0598		not annotated in Drosophila subgenus
CG30489	2R:0599		not annotated in Drosophila subgenus
CG33503	2R:0600		not annotated in Drosophila subgenus
CG7737	2R:0608	1143	not annotated in Drosophila subgenus
CG30029	2R:0617	1144	not annotated in Drosophila subgenus
CG7738	2R:0618	1144	not annotated in Drosophila subgenus
CG13223	2R:0622	1144	not annotated in Drosophila subgenus
CG30027	2R:0627	1145	not annotated in Drosophila subgenus
CG30033	2R:0633	1145	not annotated in Drosophila subgenus
CG12350	2R:0641		not annotated in Drosophila subgenus
CG12388	2R:0642		not annotated in Drosophila subgenus
CG12387	2R:0643		not annotated in Drosophila subgenus
CG12386	2R:0644		not annotated in Drosophila subgenus
CG12385	2R:0645		not annotated in Drosophila subgenus
CG18444	2R:0646		not annotated in Drosophila subgenus
CG18681	2R:0647		not annotated in Drosophila subgenus
CG18211	2R:0648		not annotated in Drosophila subgenus
CG30028	2R:0649		not annotated in Drosophila subgenus
CG30031	2R:0650		not annotated in Drosophila subgenus
CG30025	2R:0651		not annotated in Drosophila subgenus
CG12351	2R:0652		not annotated in Drosophila subgenus
CG13202	2R:0652		not annotated in Drosophila subgenus
CG7754	2R:0653		not annotated in Drosophila subgenus
CG12384	2R:0654		not annotated in Drosophila subgenus
CG30026	2R:0666		not annotated in Drosophila subgenus
CG34054	2R:0667		not annotated in Drosophila subgenus
CG7763	2R:0668	1149	not annotated in Drosophila subgenus
CG30034	2R:0673	1150	not annotated in Drosophila subgenus
CG8234	2R:0679	1152	not annotated in Drosophila subgenus
CG12444	2R:0686	1154	not annotated in Drosophila subgenus
CG30036	2R:0703	1159	not annotated in Drosophila subgenus
CG30037	2R:0704	1159	not annotated in Drosophila subgenus
CG30039	2R:0717	1162	not annotated in Drosophila subgenus
CG18343	2R:0722		not annotated in Drosophila subgenus
CG8860	2R:0731		not annotated in Drosophila subgenus
CG17967	2R:0738	1166	not annotated in Drosophila subgenus
CG8856	2R:0739	1166	not annotated in Drosophila subgenus
CG13171	2R:0740	1166	not annotated in Drosophila subgenus
CG13169	2R:0743	1166	not annotated in Drosophila subgenus
CG13167	2R:0745	1166	not annotated in Drosophila subgenus
CG13162	2R:0759		outside of SB and not annotated in dwil, dgri
CG30047	2R:0760		outside of SB and not annotated in dwil
CG30049	2R:0761		outside of SB and not annotated in dwil
CG30043	2R:0762		outside of SB and not annotated in dwil
CG33013	2R:0763		outside of SB and not annotated in dwil
CG33012	2R:0764		outside of SB and not annotated in dwil
CG13159	2R:0766	1170	not annotated in Drosophila subgenus
CG30048	2R:0774	1170	not annotated in Drosophila subgenus
CG8525	2R:0784	1172	more complex explanation
CG13154	2R:0784	1172	more complex explanation
CG30334	2R:0787	1175	not annotated in Drosophila subgenus
CG8821	2R:0794		not annotated in Drosophila subgenus
CG8569	2R:0797		not annotated in Drosophila subgenus
CG30055	2R:0802	1180	not annotated in Drosophila subgenus
CG17760	2R:0806	1181	not annotated in Drosophila subgenus
CG18356	2R:0823	1187	not annotated in Drosophila subgenus
CG17580	2R:0830		not annotated in Drosophila subgenus
CG30486	2R:0835	1190	not annotated in Drosophila subgenus
CG3814	2R:0839	1191	not annotated in Drosophila subgenus
CG30487	2R:0848	1192	not annotated in Drosophila subgenus
CG33798	2R:0852	1193	not annotated in Drosophila subgenus
CG13325	2R:0857	1194	not annotated in Drosophila subgenus
CG15870	2R:0864	1197	not annotated in Drosophila subgenus
CG4016	2R:0866		outside of SB and not annotated in dmoj, dgri
CG33138	2R:0867		outside of SB and not assembled in dgri
CG33137	2R:0868		not annotated in Drosophila subgenus
CG17724	2R:0869		outside of SB and not assembled in dgri
CG32904	2R:0869		outside of SB and not assembled in dgri
CG33182	2R:0869		outside of SB and not assembled in dgri
CG4062	2R:0870		outside of SB and not assembled in dgri
CG4088	2R:0871		outside of SB and not assembled in dgri
CG4616	2R:0872		outside of SB and not assembled in dgri
CG30058	2R:0872		not annotated in Drosophila subgenus
CG12251	2R:0873		outside of SB and not assembled in dgri
CG4627	2R:0874		outside of SB and not assembled in dgri
CG4630	2R:0875		outside of SB and not assembled in dgri
CG12765	2R:0879		more complex explanation
CG4670	2R:0880		more complex explanation
CG4676	2R:0881		more complex explanation
CG4679	2R:0882		more complex explanation
CG4716	2R:0887	1201	not annotated in Drosophila subgenus
CG10799	2R:0888	1201	not annotated in Drosophila subgenus
CG18279	2R:0899		not annotated in Drosophila subgenus
CG18278	2R:0899		not annotated in Drosophila subgenus
CG33470	2R:0900		not annotated in Drosophila subgenus
CG30059	2R:0900		not annotated in Drosophila subgenus
CG30065	2R:0902	1204	not annotated in Drosophila subgenus
CG13334	2R:0919		not annotated in Drosophila subgenus
CG6209	2R:0925	1212	not annotated in Drosophila subgenus
CG30484	2R:0937	1212	not annotated in Drosophila subgenus
CG30485	2R:0938	1212	not annotated in Drosophila subgenus
CG6553	2R:0939		not annotated in Drosophila subgenus
CG6704	2R:0949		not annotated in Drosophila subgenus
CG30482	2R:0954		not annotated in Drosophila subgenus
CG8257	2R:0959	1223	more complex explanation
CG8323	2R:0962		not annotated in Drosophila subgenus
CG18327	2R:0963		not annotated in Drosophila subgenus
CG10102	2R:0990		not annotated in Drosophila subgenus
CG13941	2R:0990		not annotated in Drosophila subgenus
CG30075	2R:0997	1233	not annotated in Drosophila subgenus
CG17389	2R:1005	1235	not annotated in Drosophila subgenus
CG10131	2R:1021		not annotated in Drosophila subgenus
CG12862	2R:1022		not annotated in Drosophila subgenus
CG30477	2R:1023		not annotated in Drosophila subgenus
CG10139	2R:1024		not annotated in Drosophila subgenus
CG10143	2R:1025		not annotated in Drosophila subgenus
CG12861	2R:1026		not annotated in Drosophila subgenus
CG12860	2R:1027		not annotated in Drosophila subgenus
CG12866	2R:1028		not annotated in Drosophila subgenus
CG10145	2R:1029		not annotated in Drosophila subgenus
CG30479	2R:1029		not annotated in Drosophila subgenus
CG30480	2R:1029		not annotated in Drosophila subgenus
CG12865	2R:1030		not annotated in Drosophila subgenus
CG10816	2R:1032	1245	not annotated in Drosophila subgenus
CG12854	2R:1040		not annotated in Drosophila subgenus
CG10246	2R:1056	1250	not annotated in Drosophila subgenus
CG12853	2R:1063	1252	not annotated in Drosophila subgenus
CG30473	2R:1069	1255	not annotated in Drosophila subgenus
CG33467	2R:1070	1255	not annotated in Drosophila subgenus
CG8089	2R:1072		not annotated in Drosophila subgenus
CG30081	2R:1077	1256	not annotated in Drosophila subgenus
CG16827	2R:1082	1258	not annotated in Drosophila subgenus
CG8157	2R:1090	1259	not annotated in Drosophila subgenus
CG8160	2R:1091	1259	not annotated in Drosophila subgenus
CG8175	2R:1096	1261	not annotated in Drosophila subgenus
CG30472	2R:1098	1261	not annotated in Drosophila subgenus
CG12960	2R:1103	1261	not annotated in Drosophila subgenus
CG8200	2R:1115		more complex explanation
CG8203	2R:1116		more complex explanation
CG30466	2R:1117		more complex explanation
CG30465	2R:1119	1265	not annotated in Drosophila subgenus
CG8210	2R:1122	1265	not annotated in Drosophila subgenus
CG30091	2R:1123	1265	not annotated in Drosophila subgenus
CG30090	2R:1125		not annotated in Drosophila subgenus
CG30088	2R:1126		not annotated in Drosophila subgenus
CG30087	2R:1127		not annotated in Drosophila subgenus
CG33460	2R:1128		not annotated in Drosophila subgenus
CG33461	2R:1129		not annotated in Drosophila subgenus
CG33462	2R:1130		not annotated in Drosophila subgenus
CG30080	2R:1131		not annotated in Drosophila subgenus
CG30083	2R:1132		not annotated in Drosophila subgenus
CG30321	2R:1134	1266	not annotated in Drosophila subgenus
CG33465	2R:1135		not annotated in Drosophila subgenus
CG8246	2R:1136		outside of SB and not annotated in dmoj
CG8249	2R:1137		outside of SB and not annotated in dmoj
CG8253	2R:1138		outside of SB and not annotated in dmoj
CG33463	2R:1143	1269	not annotated in Drosophila subgenus
CG8320	2R:1154	1274	more complex explanation
CG8322	2R:1154	1274	more complex explanation
CG8395	2R:1156		outside of SB and not annotated in dwil
CG8397	2R:1156		outside of SB and not annotated in dwil
CG10734	2R:1173		not annotated in Drosophila subgenus
CG9068	2R:1198	1291	not annotated in Drosophila subgenus
CG15710	2R:1213		not annotated in Drosophila subgenus
CG30098	2R:1214		not annotated in Drosophila subgenus
CG15711	2R:1216	1296	not annotated in Drosophila subgenus
CG4398	2R:1218		not annotated in Drosophila subgenus
CG33550	2R:1222		not annotated in Drosophila subgenus
CG33524	2R:1223		not annotated in Drosophila subgenus
CG33458	2R:1225	1298	not annotated in Drosophila subgenus
CG33459	2R:1226	1298	not annotated in Drosophila subgenus
CG4918	2R:1237		outside of SB and not annotated in dpse, dvir
CG8626	2R:1250	1302	not annotated in Drosophila subgenus
CG15616	2R:1251	1302	not annotated in Drosophila subgenus
CG8622	2R:1252	1302	not annotated in Drosophila subgenus
CG33530	2R:1253	1302	not annotated in Drosophila subgenus
CG5348	2R:1255		not annotated in Drosophila subgenus
CG5550	2R:1263		outside of SB and not annotated in dpse
CG6301	2R:1264		outside of SB and not annotated in dpse
CG8652	2R:1265		not annotated in Drosophila subgenus
CG5859	2R:1266		outside of SB and not annotated in dpse
CG8648	2R:1266		outside of SB and not annotated in dpse
CG5935	2R:1267		outside of SB and not annotated in dpse
CG8912	2R:1268		outside of SB and not annotated in dpse
CG9013	2R:1277	1306	not annotated in Drosophila subgenus
CG30461	2R:1283	1307	not annotated in Drosophila subgenus
CG18730	2R:1303	1315	not annotated in Drosophila subgenus
CG10956	2R:1304	1315	not annotated in Drosophila subgenus
CG17876	2R:1305	1315	not annotated in Drosophila subgenus
CG11400	2R:1308	1315	not annotated in Drosophila subgenus
CG15917	2R:1309	1315	not annotated in Drosophila subgenus
CG17287	2R:1312	1315	not annotated in Drosophila subgenus
CG10950	2R:1316	1315	not annotated in Drosophila subgenus
CG18469	2R:1317	1315	not annotated in Drosophila subgenus
CG12699	2R:1318	1315	not annotated in Drosophila subgenus
CG6536	2R:1329	1318	not annotated in Drosophila subgenus
CG6530	2R:1330	1318	not annotated in Drosophila subgenus
CG10764	2R:1331	1318	not annotated in Drosophila subgenus
CG14479	2R:1340	1319	not annotated in Drosophila subgenus
CG18186	2R:1360	1327	not annotated in Drosophila subgenus
CG30108	2R:1363		not annotated in Drosophila subgenus
CG10934	2R:1371	1332	not annotated in Drosophila subgenus
CG12298	2R:1378	1337	more complex explanation
CG6385	2R:1381	1338	more complex explanation
CG30111	2R:1391	1339	not annotated in Drosophila subgenus
CG30323	2R:1392	1339	not annotated in Drosophila subgenus
CG30110	2R:1395	1341	not annotated in Drosophila subgenus
CG14494	2R:1398	1342	not annotated in Drosophila subgenus
CG14500	2R:1431	1354	not annotated in Drosophila subgenus
CG30114	2R:1432	1354	not annotated in Drosophila subgenus
CG18540	2R:1442	1354	not annotated in Drosophila subgenus
CG14505	2R:1443	1354	not annotated in Drosophila subgenus
CG14503	2R:1444	1354	not annotated in Drosophila subgenus
CG18107	2R:1447	1354	not annotated in Drosophila subgenus
CG16844	2R:1449	1354	not annotated in Drosophila subgenus
CG15065	2R:1451	1354	not annotated in Drosophila subgenus
CG15068	2R:1452	1354	not annotated in Drosophila subgenus
CG5164	2R:1455	1354	not annotated in Drosophila subgenus
CG17523	2R:1456	1354	not annotated in Drosophila subgenus
CG17524	2R:1457	1354	not annotated in Drosophila subgenus
CG17525	2R:1458	1354	not annotated in Drosophila subgenus
CG17527	2R:1459	1354	not annotated in Drosophila subgenus
CG30119	2R:1476	1357	not annotated in Drosophila subgenus
CG30332	2R:1479		not annotated in Drosophila subgenus
CG5345	2R:1484		outside of SB and not annotated in dpse, dwil
CG5482	2R:1485		outside of SB and not annotated in dgri
CG33724	2R:1487		not annotated in Drosophila subgenus
CG30121	2R:1496	1366	not annotated in Drosophila subgenus
CG15107	2R:1522	1370	not annotated in Drosophila subgenus
CG15115	2R:1528	1370	not annotated in Drosophila subgenus
CG15116	2R:1529	1370	not annotated in Drosophila subgenus
CG30125	2R:1531	1370	not annotated in Drosophila subgenus
CG15117	2R:1532		outside of SB and not annotated in dgri
CG33454	2R:1541	1373	not annotated in Drosophila subgenus
CG33453	2R:1542	1373	not annotated in Drosophila subgenus
CG10476	2R:1546	1373	not annotated in Drosophila subgenus
CG10474	2R:1547	1373	not annotated in Drosophila subgenus
CG18606	2R:1548	1373	not annotated in Drosophila subgenus
CG18607	2R:1549	1373	not annotated in Drosophila subgenus
CG7461	2R:1553		outside of SB and not annotated in dpse, dwil
CG7726	2R:1571		outside of SB and not annotated in dpse
CG7735	2R:1572		outside of SB and not annotated in dpse
CG9291	2R:1573		outside of SB and not annotated in dpse
CG9277	2R:1574		outside of SB and not annotated in dpse
CG7744	2R:1575		outside of SB and not annotated in dgri
CG30130	2R:1586	1384	not annotated in Drosophila subgenus
CG11018	2R:1592	1384	not annotated in Drosophila subgenus
CG30450	2R:1603	1384	not annotated in Drosophila subgenus
CG30448	2R:1609	1384	not annotated in Drosophila subgenus
CG30447	2R:1611	1384	not annotated in Drosophila subgenus
CG10822	2R:1612	1384	not annotated in Drosophila subgenus
CG16898	2R:1614	1384	not annotated in Drosophila subgenus
CG18416	2R:1617	1384	not annotated in Drosophila subgenus
CG11209	2R:1622		outside of SB and not annotated in dwil, dgri
CG16741	2R:1642	1395	not annotated in Drosophila subgenus
CG30142	2R:1647	1395	not annotated in Drosophila subgenus
CG30141	2R:1648	1395	not annotated in Drosophila subgenus
CG13428	2R:1656	1397	not annotated in Drosophila subgenus
CG30145	2R:1658	1397	not annotated in Drosophila subgenus
CG30150	2R:1659	1397	not annotated in Drosophila subgenus
CG30153	2R:1665	1400	not annotated in Drosophila subgenus
CG15231	2R:1691	1403	not annotated in Drosophila subgenus
CG10067	2R:1698	1403	not annotated in Drosophila subgenus
CG33704	2R:1699	1403	not annotated in Drosophila subgenus
CG3221	2R:1706	1406	more complex explanation
CG4038	2R:1725	1411	more complex explanation
CG30393	2R:1744	1414	not annotated in Drosophila subgenus
CG10505	2R:1748		outside of SB and not annotated in dvir, dmoj
CG30392	2R:1749		outside of SB and not annotated in dvir, dmoj
CG10071	2R:1751	1416	more complex explanation
CG9696	2R:1754	1419	more complex explanation
CG30282	2R:1765	1422	not annotated in Drosophila subgenus
CG30288	2R:1768		not annotated in Drosophila subgenus
CG30289	2R:1769		not annotated in Drosophila subgenus
CG30286	2R:1770		not annotated in Drosophila subgenus
CG30287	2R:1771		not annotated in Drosophila subgenus
CG33226	2R:1772		not annotated in Drosophila subgenus
CG30283	2R:1773		not annotated in Drosophila subgenus
CG33225	2R:1777	1423	not annotated in Drosophila subgenus
CG15675	2R:1789	1426	not annotated in Drosophila subgenus
CG15676	2R:1791		not annotated in Drosophila subgenus
CG30395	2R:1803	1430	not annotated in Drosophila subgenus
CG4021	2R:1804	1430	not annotated in Drosophila subgenus
CG9284	2R:1808	1430	not annotated in Drosophila subgenus
CG4372	2R:1813	1430	not annotated in Drosophila subgenus
CG13494	2R:1820	1430	not annotated in Drosophila subgenus
CG34029	2R:1823	1430	not annotated in Drosophila subgenus
CG30396	2R:1827	1431	not annotated in Drosophila subgenus
CG10138	2R:1832	1431	not annotated in Drosophila subgenus
CG13504	2R:1845		not annotated in Drosophila subgenus
CG11170	2R:1848	1439	not annotated in Drosophila subgenus
CG30279	2R:1848	1439	not annotated in Drosophila subgenus
CG3290	2R:1852		not annotated in Drosophila subgenus
CG3264	2R:1853		not annotated in Drosophila subgenus
CG11291	2R:1854		not annotated in Drosophila subgenus
CG33200	2R:1871	1444	not annotated in Drosophila subgenus
CG11362	2R:1886	1452	not annotated in Drosophila subgenus
CG3927	2R:1888	1452	not annotated in Drosophila subgenus
CG3875	2R:1902	1457	not annotated in Drosophila subgenus
CG4250	2R:1909		outside of SB and not annotated in dgri
CG30267	2R:1923	1459	not annotated in Drosophila subgenus
CG13535	2R:1941	1464	not annotated in Drosophila subgenus
CG30187	2R:1950		not annotated in Drosophila subgenus
CG3788	2R:1953	1468	not annotated in Drosophila subgenus
CG13534	2R:1956	1468	not annotated in Drosophila subgenus
CG32835	2R:1957	1468	not annotated in Drosophila subgenus
CG13542	2R:1961		not annotated in Drosophila subgenus
CG2952	2R:1966		not annotated in Drosophila subgenus
CG3082	2R:1967		outside of SB and not annotated in dgri
CG9888	2R:1968		outside of SB and not annotated in dgri
CG30191	2R:1971	1471	not annotated in Drosophila subgenus
CG13538	2R:1973	1471	not annotated in Drosophila subgenus
CG9873	2R:1975	1471	not annotated in Drosophila subgenus
CG3219	2R:1978	1471	not annotated in Drosophila subgenus
CG3215	2R:1979	1471	not annotated in Drosophila subgenus
CG30192	2R:1980	1471	not annotated in Drosophila subgenus
CG13544	2R:1980	1471	not annotated in Drosophila subgenus
CG13539	2R:1986	1471	not annotated in Drosophila subgenus
CG9871	2R:1990	1471	not annotated in Drosophila subgenus
CG13540	2R:1992	1471	not annotated in Drosophila subgenus
CG13541	2R:1995	1471	not annotated in Drosophila subgenus
CG30416	2R:1998	1471	not annotated in Drosophila subgenus
CG30413	2R:2001	1471	not annotated in Drosophila subgenus
CG9875	2R:2005		not annotated in Drosophila subgenus
CG9889	2R:2008	1476	not annotated in Drosophila subgenus
CG9891	2R:2008	1476	not annotated in Drosophila subgenus
CG30414	2R:2009		not annotated in Drosophila subgenus
CG12227	2R:2016	1477	not annotated in Drosophila subgenus
CG13559	2R:2025	1477	not annotated in Drosophila subgenus
CG5372	2R:2035	1480	not annotated in Drosophila subgenus
CG30182	2R:2038	1480	not annotated in Drosophila subgenus
CG10332	2R:2039		not annotated in Drosophila subgenus
CG33706	2R:2039		not annotated in Drosophila subgenus
CG13560	2R:2056		not annotated in Drosophila subgenus
CG12491	2R:2057		not annotated in Drosophila subgenus
CG11300	2R:2058		not annotated in Drosophila subgenus
CG15800	2R:2060	1484	not annotated in Drosophila subgenus
CG30177	2R:2061	1484	not annotated in Drosophila subgenus
CG12752	2R:2064	1485	more complex explanation
CG5597	2R:2080		not annotated in Drosophila subgenus
CG17658	2R:2083	1495	more complex explanation
CG13565	2R:2093		not annotated in Drosophila subgenus
CG16783	2R:2094	1501	not annotated in Drosophila subgenus
CG2987	2R:2097		outside of SB and not annotated in dpse
CG13566	2R:2098		outside of SB and not annotated in dpse
CG3006	2R:2099		outside of SB and not annotated in dpse
CG3825	2R:2105		outside of SB and not annotated in dvir
CG3832	2R:2107		outside of SB and not annotated in dvir
CG30178	2R:2107		not annotated in Drosophila subgenus
CG4324	2R:2111		not annotated in Drosophila subgenus
CG11388	2R:2114		outside of SB and not annotated in dvir
CG3140	2R:2115		outside of SB and not annotated in dwil, dvir, dmoj
CG11390	2R:2116		outside of SB and not annotated in dvir, dmoj
CG30173	2R:2117		outside of SB and not annotated in dmoj
CG3163	2R:2118		outside of SB and not annotated in dmoj
CG4254	2R:2124		outside of SB and not annotated in dmoj, dgri
CG3988	2R:2125		not annotated in Drosophila subgenus
CG3182	2R:2126		not annotated in Drosophila subgenus
CG13568	2R:2126		outside of SB and not annotated in dpse, dmoj
CG13563	2R:2127		outside of SB and not annotated in dvir, dmoj
CG3186	2R:2128		not annotated in Drosophila subgenus
CG33149	2R:2134		not annotated in Drosophila subgenus
CG30174	2R:2135		outside of SB and not annotated in dvir
CG30179	2R:2136		not annotated in Drosophila subgenus
CG13564	2R:2138		not annotated in Drosophila subgenus
CG3253	2R:2144		outside of SB and not annotated in dmoj
CG13577	2R:2161	1529	not annotated in Drosophila subgenus
CG15873	2R:2176	1531	not annotated in Drosophila subgenus
CG13589	2R:2184	1531	not annotated in Drosophila subgenus
CG13590	2R:2185	1531	not annotated in Drosophila subgenus
CG13591	2R:2187	1531	not annotated in Drosophila subgenus
CG4612	2R:2192		outside of SB and not annotated in dmoj, dgri
CG13592	2R:2194	1532	not annotated in Drosophila subgenus
CG3650	2R:2240	1544	not annotated in Drosophila subgenus
CG15859	2R:2241	1544	not annotated in Drosophila subgenus
CG30420	2R:2242	1544	more complex explanation
CG30425	2R:2246	1545	not annotated in Drosophila subgenus
CG30424	2R:2257		not annotated in Drosophila subgenus
CG30430	2R:2270	1550	not annotated in Drosophila subgenus
CG2665	2R:2272	1550	not annotated in Drosophila subgenus
CG2668	2R:2273	1550	not annotated in Drosophila subgenus
CG6821	3L:0002	1553	not annotated in Drosophila subgenus
CG12483	3L:0004	1553	not annotated in Drosophila subgenus
CG33790	3L:0018	1559	more complex explanation
CG1220	3L:0018	1559	more complex explanation
CG17142	3L:0018	1559	more complex explanation
CG13877	3L:0018	1559	more complex explanation
CG16971	3L:0019		not annotated in Drosophila subgenus
CG33229	3L:0019		more complex explanation
CG34018	3L:0020		more complex explanation
CG32845	3L:0027	1562	not annotated in Drosophila subgenus
CG13883	3L:0031	1562	not annotated in Drosophila subgenus
CG7004	3L:0033		more complex explanation
CG32344	3L:0034		more complex explanation
CG32343	3L:0035		more complex explanation
CG1228	3L:0036	1563	more complex explanation
CG1231	3L:0037		not annotated in Drosophila subgenus
CG13884	3L:0039	1565	not annotated in Drosophila subgenus
CG13891	3L:0042	1566	not annotated in Drosophila subgenus
CG13892	3L:0044	1567	not annotated in Drosophila subgenus
CG32345	3L:0050		not annotated in Drosophila subgenus
CG17129	3L:0055		not annotated in Drosophila subgenus
CG3217	3L:0063	1572	not annotated in Drosophila subgenus
CG13896	3L:0064	1572	not annotated in Drosophila subgenus
CG32341	3L:0067	1572	not annotated in Drosophila subgenus
CG13898	3L:0068	1572	not annotated in Drosophila subgenus
CG34057	3L:0081	1576	not annotated in Drosophila subgenus
CG9094	3L:0089	1578	not annotated in Drosophila subgenus
CG32334	3L:0090	1578	not annotated in Drosophila subgenus
CG32336	3L:0091	1578	not annotated in Drosophila subgenus
CG9120	3L:0095	1578	not annotated in Drosophila subgenus
CG32335	3L:0097		not annotated in Drosophila subgenus
CG9111	3L:0101	1581	more complex explanation
CG32318	3L:0109		not annotated in Drosophila subgenus
CG32320	3L:0132	1592	not annotated in Drosophila subgenus
CG9168	3L:0133	1592	not annotated in Drosophila subgenus
CG1014	3L:0139	1592	not annotated in Drosophila subgenus
CG32331	3L:0139	1592	not annotated in Drosophila subgenus
CG32313	3L:0147		not annotated in Drosophila subgenus
CG1049	3L:0148		not annotated in Drosophila subgenus
CG18170	3L:0154	1598	not annotated in Drosophila subgenus
CG13927	3L:0156	1599	more complex explanation
CG13928	3L:0156	1599	more complex explanation
CG13932	3L:0172	1603	not annotated in Drosophila subgenus
CG18171	3L:0174	1604	not annotated in Drosophila subgenus
CG12035	3L:0174	1604	more complex explanation
CG8001	3L:0179	1606	more complex explanation
CG11815	3L:0209	1617	not annotated in Drosophila subgenus
CG32308	3L:0211	1617	not annotated in Drosophila subgenus
CG32305	3L:0227		outside of SB and not annotated in dvir, dgri
CG32304	3L:0233	1620	not annotated in Drosophila subgenus
CG13801	3L:0239	1620	not annotated in Drosophila subgenus
CG1262	3L:0268	1624	not annotated in Drosophila subgenus
CG1241	3L:0272		outside of SB and not annotated in dvir, dmoj
CG14952	3L:0276	1625	not annotated in Drosophila subgenus
CG9970	3L:0279	1625	not annotated in Drosophila subgenus
CG34025	3L:0281	1625	not annotated in Drosophila subgenus
CG2075	3L:0288		not annotated in Drosophila subgenus
CG32284	3L:0311	1634	not annotated in Drosophila subgenus
CG14957	3L:0312	1634	not annotated in Drosophila subgenus
CG14958	3L:0313	1634	not annotated in Drosophila subgenus
CG32275	3L:0325	1640	not annotated in Drosophila subgenus
CG17723	3L:0328		outside of SB and not annotated in dgri
CG32279	3L:0329		not annotated in Drosophila subgenus
CG32283	3L:0330		not annotated in Drosophila subgenus
CG32282	3L:0331		not annotated in Drosophila subgenus
CG10812	3L:0332		not annotated in Drosophila subgenus
CG12077	3L:0333		outside of SB and not annotated in dgri
CG32274	3L:0337		not annotated in Drosophila subgenus
CG32268	3L:0338		not annotated in Drosophila subgenus
CG10810	3L:0340		not annotated in Drosophila subgenus
CG12010	3L:0342	1645	not annotated in Drosophila subgenus
CG14974	3L:0356		not annotated in Drosophila subgenus
CG32263	3L:0363	1648	not annotated in Drosophila subgenus
CG10852	3L:0365	1649	not annotated in Drosophila subgenus
CG14975	3L:0366	1649	not annotated in Drosophila subgenus
CG32265	3L:0375	1652	not annotated in Drosophila subgenus
CG12766	3L:0377	1652	not annotated in Drosophila subgenus
CG14983	3L:0381	1653	not annotated in Drosophila subgenus
CG32261	3L:0388		not annotated in Drosophila subgenus
CG32254	3L:0396	1655	not annotated in Drosophila subgenus
CG32259	3L:0398	1655	not annotated in Drosophila subgenus
CG14990	3L:0402	1656	not annotated in Drosophila subgenus
CG15811	3L:0408	1658	more complex explanation
CG33764	3L:0430	1663	not annotated in Drosophila subgenus
CG32249	3L:0459	1669	not annotated in Drosophila subgenus
CG32243	3L:0471	1669	not annotated in Drosophila subgenus
CG33777	3L:0473	1669	not annotated in Drosophila subgenus
CG13719	3L:0474	1669	not annotated in Drosophila subgenus
CG32247	3L:0475	1669	not annotated in Drosophila subgenus
CG32246	3L:0475	1669	not annotated in Drosophila subgenus
CG12493	3L:0484	1669	not annotated in Drosophila subgenus
CG32235	3L:0491	1669	not annotated in Drosophila subgenus
CG32233	3L:0496	1669	not annotated in Drosophila subgenus
CG12027	3L:0499		not annotated in Drosophila subgenus
CG34047	3L:0500		not annotated in Drosophila subgenus
CG10677	3L:0511	1673	not annotated in Drosophila subgenus
CG10630	3L:0521		not annotated in Drosophila subgenus
CG10594	3L:0531	1679	not annotated in Drosophila subgenus
CG17795	3L:0536	1681	not annotated in Drosophila subgenus
CG5568	3L:0555	1688	not annotated in Drosophila subgenus
CG18586	3L:0556	1688	not annotated in Drosophila subgenus
CG13291	3L:0570	1690	not annotated in Drosophila subgenus
CG10478	3L:0572	1690	not annotated in Drosophila subgenus
CG10533	3L:0597	1693	not annotated in Drosophila subgenus
CG8219	3L:0618	1696	not annotated in Drosophila subgenus
CG32401	3L:0626	1697	not annotated in Drosophila subgenus
CG32402	3L:0627	1697	not annotated in Drosophila subgenus
CG32399	3L:0630	1697	not annotated in Drosophila subgenus
CG32398	3L:0631	1697	not annotated in Drosophila subgenus
CG32396	3L:0637	1700	not annotated in Drosophila subgenus
CG33280	3L:0643		not annotated in Drosophila subgenus
CG32395	3L:0645	1702	not annotated in Drosophila subgenus
CG18156	3L:0662	1704	not annotated in Drosophila subgenus
CG32388	3L:0665	1704	not annotated in Drosophila subgenus
CG32391	3L:0671	1705	not annotated in Drosophila subgenus
CG34030	3L:0672	1705	not annotated in Drosophila subgenus
CG8620	3L:0685		not annotated in Drosophila subgenus
CG8588	3L:0708		not annotated in Drosophila subgenus
CG14835	3L:0720	1717	not annotated in Drosophila subgenus
CG32383	3L:0721	1717	not annotated in Drosophila subgenus
CG32382	3L:0722	1717	not annotated in Drosophila subgenus
CG16992	3L:0730	1717	not annotated in Drosophila subgenus
CG16998	3L:0738	1717	not annotated in Drosophila subgenus
CG32374	3L:0739	1717	not annotated in Drosophila subgenus
CG7526	3L:0742	1717	more complex explanation
CG32373	3L:0748	1719	more complex explanation
CG32371	3L:0750	1720	not annotated in Drosophila subgenus
CG32368	3L:0758		not annotated in Drosophila subgenus
CG7498	3L:0782	1728	not annotated in Drosophila subgenus
CG7476	3L:0786	1729	not annotated in Drosophila subgenus
CG8012	3L:0795	1731	not annotated in Drosophila subgenus
CG13673	3L:0800	1731	not annotated in Drosophila subgenus
CG7194	3L:0806		not annotated in Drosophila subgenus
CG7118	3L:0821	1736	not annotated in Drosophila subgenus
CG7170	3L:0822	1736	not annotated in Drosophila subgenus
CG6915	3L:0831		more complex explanation
CG6902	3L:0832		outside of SB and not annotated in dwil, dgri
CG6817	3L:0838		outside of SB and not assembled in dgri
CG6519	3L:0858	1744	not annotated in Drosophila subgenus
CG32024	3L:0869	1744	not annotated in Drosophila subgenus
CG32033	3L:0878	1745	not annotated in Drosophila subgenus
CG5653	3L:0883		not annotated in Drosophila subgenus
CG4476	3L:0912	1753	not annotated in Drosophila subgenus
CG4477	3L:0914	1753	not annotated in Drosophila subgenus
CG4035	3L:0930		not annotated in Drosophila subgenus
CG33926	3L:0939		not annotated in Drosophila subgenus
CG12526	3L:0957	1767	not annotated in Drosophila subgenus
CG3088	3L:0962	1767	not annotated in Drosophila subgenus
CG3335	3L:0966	1767	more complex explanation
[truncated: 1,001 more rows]

## Sheet: missed genes under OLC
Gene	IGA	HCB#	Explnation why a gene is missed
CG13376	X:0005		outside of SB and not annotated in dmoj
CG3114	X:0006		outside of SB and not annotated in dwil
CG13375	X:0007		outside of SB and not annotated in dwil
CG13373	X:0020		not annotated in Drosophila subgenus
CG18275	X:0021		not annotated in Drosophila subgenus
CG32817	X:0022		not annotated in Drosophila subgenus
CG18166	X:0023		not annotated in Drosophila subgenus
CG13369	X:0036		outside of SB and not annotated in dwil, dmoj, dgri
CG13364	X:0036		outside of SB and not annotated in dwil, dmoj, dgri
CG16983	X:0043		not annotated in Drosophila subgenus
CG5273	X:0047		outside of SB and not annotated in dwil
CG7434	X:0048		outside of SB and not annotated in dwil
CG13359	X:0053		not annotated in Drosophila subgenus
CG13358	X:0054		not annotated in Drosophila subgenus
CG14635	X:0057	23	not annotated in Drosophila subgenus
CG3713	X:0058	23	not annotated in Drosophila subgenus
CG14634	X:0059	23	not annotated in Drosophila subgenus
CG11664	X:0060	23	not annotated in Drosophila subgenus
CG11663	X:0063	23	not annotated in Drosophila subgenus
CG18823	X:0072	25	not annotated in Drosophila subgenus
CG11639	X:0073	25	not annotated in Drosophila subgenus
CG14631	X:0074	25	not annotated in Drosophila subgenus
CG32814	X:0075	25	not annotated in Drosophila subgenus
CG3658	X:0076	26	more complex explanation
CG14628	X:0081	27	not annotated in Drosophila subgenus
CG11398	X:0093		not annotated in Drosophila subgenus
CG3638	X:0094		not annotated in Drosophila subgenus
CG32812	X:0097		outside of SB and not annotated in dmoj
CG32811	X:0099		not annotated in Drosophila subgenus
CG18091	X:0100		not annotated in Drosophila subgenus
CG14774	X:0111		not annotated in Drosophila subgenus
CG14773	X:0115	42	not annotated in Drosophila subgenus
CG32810	X:0134		outside of SB and not annotated in dyak
CG11509	X:0136	48	not annotated in Drosophila subgenus
CG14798	X:0140	50	not annotated in Drosophila subgenus
CG14809	X:0143	51	not annotated in Drosophila subgenus
CG32806	X:0145		not annotated in Drosophila subgenus
CG14810	X:0146		not annotated in Drosophila subgenus
CG14811	X:0147		not annotated in Drosophila subgenus
CG14799	X:0148		not annotated in Drosophila subgenus
CG14816	X:0154		outside of SB and not annotated in dwil
CG32802	X:0169		not annotated in Drosophila subgenus
CG14054	X:0180		not annotated in Drosophila subgenus
CG4199	X:0181	66	more complex explanation
CG4194	X:0181	66	more complex explanation
CG32804	X:0181	66	not annotated in Drosophila subgenus
CG3895	X:0185		not annotated in Drosophila subgenus
CG3621	X:0192		not annotated in Drosophila subgenus
CG3466	X:0194		not annotated in Drosophila subgenus
CG10755	X:0195		not annotated in Drosophila subgenus
CG17776	X:0197		outside of SB and not annotated in dmoj
CG17777	X:0198		outside of SB and not annotated in dmoj
CG14053	X:0200	74	not annotated in Drosophila subgenus
CG34052	X:0219	79	not annotated in Drosophila subgenus
CG2854	X:0221		not annotated in Drosophila subgenus
CG33218	X:0222		not annotated in Drosophila subgenus
CG14049	X:0223		not annotated in Drosophila subgenus
CG32797	X:0230		not annotated in Drosophila subgenus
CG7952	X:0231		outside of SB and not annotated in dgri
CG7925	X:0232		outside of SB and not annotated in dgri
CG8590	X:0241		outside of SB and not annotated in dgri
CG13762	X:0246		not annotated in Drosophila subgenus
CG2706	X:0260		outside of SB and not annotated in dpse
CG32794	X:0274	97	not annotated in Drosophila subgenus
CG14265	X:0294	99	not annotated in Drosophila subgenus
CG14266	X:0294	99	not annotated in Drosophila subgenus
CG10788	X:0294	99	not annotated in Drosophila subgenus
CG10781	X:0294	99	not annotated in Drosophila subgenus
CG10789	X:0294	99	not annotated in Drosophila subgenus
CG10801	X:0299	100	not annotated in Drosophila subgenus
CG13021	X:0307	102	not annotated in Drosophila subgenus
CG12462	X:0314		not annotated in Drosophila subgenus
CG2947	X:0317		not annotated in Drosophila subgenus
CG33221	X:0319	107	not annotated in Drosophila subgenus
CG32789	X:0320	107	not annotated in Drosophila subgenus
CG32786	X:0333		not annotated in Drosophila subgenus
CG6450	X:0336		more complex explanation
CG6414	X:0338		outside of SB and not assembled in dana
CG15375	X:0344		not annotated in Drosophila subgenus
CG15576	X:0357	118	not annotated in Drosophila subgenus
CG15578	X:0361	118	not annotated in Drosophila subgenus
CG12692	X:0362	118	not annotated in Drosophila subgenus
CG15579	X:0363	118	more complex explanation
CG12688	X:0369	120	not annotated in Drosophila subgenus
CG32773	X:0370	120	not annotated in Drosophila subgenus
CG12685	X:0372	120	not annotated in Drosophila subgenus
CG12684	X:0382	125	not annotated in Drosophila subgenus
CG12184	X:0384		not annotated in Drosophila subgenus
CG12179	X:0385		not annotated in Drosophila subgenus
CG6998	X:0395		outside of SB and not annotated in dwil
CG12683	X:0399	130	not annotated in Drosophila subgenus
CG15472	X:0400	130	not annotated in Drosophila subgenus
CG2871	X:0402	130	not annotated in Drosophila subgenus
CG2861	X:0405	130	not annotated in Drosophila subgenus
CG12681	X:0407	130	not annotated in Drosophila subgenus
CG12732	X:0441	141	not annotated in Drosophila subgenus
CG17763	X:0455	148	not annotated in Drosophila subgenus
CG32763	X:0457	149	more complex explanation
CG15767	X:0487		not annotated in Drosophila subgenus
CG12239	X:0488		outside of SB and not annotated in dgri
CG4052	X:0489		not annotated in Drosophila subgenus
CG18341	X:0490		outside of SB and not annotated in dwil, dgri
CG15766	X:0491		outside of SB and not annotated in dgri
CG15765	X:0492		outside of SB and not annotated in dgri
CG11462	X:0492		not annotated in Drosophila subgenus
CG12729	X:0493		not annotated in Drosophila subgenus
CG15764	X:0494		not annotated in Drosophila subgenus
CG12728	X:0503	160	not annotated in Drosophila subgenus
CG4336	X:0513		outside of SB and not annotated in dgri
CG32745	X:0536		not annotated in Drosophila subgenus
CG11700	X:0537		not annotated in Drosophila subgenus
CG33664	X:0553		not annotated in Drosophila subgenus
CG33669	X:0554		not annotated in Drosophila subgenus
CG33668	X:0555		not annotated in Drosophila subgenus
CG33667	X:0557	179	not annotated in Drosophila subgenus
CG33666	X:0558	179	not annotated in Drosophila subgenus
CG33665	X:0559	179	not annotated in Drosophila subgenus
CG3918	X:0561		outside of SB and not annotated in dmoj
CG3342	X:0561		outside of SB and not annotated in dmoj
CG14443	X:0570	182	not annotated in Drosophila subgenus
CG32741	X:0582	186	not annotated in Drosophila subgenus
CG14439	X:0586		outside of SB and not annotated in dgri
CG14438	X:0587		outside of SB and not annotated in dgri
CG4575	X:0602		not annotated in Drosophila subgenus
CG32733	X:0603		not annotated in Drosophila subgenus
CG4593	X:0614		outside of SB and not assembled in dvir
CG8300	X:0622		outside of SB and not annotated in dwil
CG4626	X:0622		outside of SB and not annotated in dwil
CG18155	X:0631		outside of SB and not assembled in dwil
CG15034	X:0633	208	not annotated in Drosophila subgenus
CG32727	X:0637	208	not annotated in Drosophila subgenus
CG15036	X:0639	208	not annotated in Drosophila subgenus
CG32726	X:0640	208	not annotated in Drosophila subgenus
CG32719	X:0642	208	not annotated in Drosophila subgenus
CG12689	X:0645	208	not annotated in Drosophila subgenus
CG32718	X:0656		not annotated in Drosophila subgenus
CG15325	X:0664		outside of SB and not annotated in dwil, dmoj
CG10932	X:0665		outside of SB and not annotated in dmoj
CG11386	X:0669	216	not annotated in Drosophila subgenus
CG33222	X:0670	216	not annotated in Drosophila subgenus
CG15330	X:0685	221	not annotated in Drosophila subgenus
CG1543	X:0687		outside of SB and not annotated in dwil, dvir
CG15333	X:0687		not annotated in Drosophila subgenus
CG2233	X:0688		outside of SB and not annotated in dvir
CG10759	X:0711		not annotated in Drosophila subgenus
CG32715	X:0717	236	not annotated in Drosophila subgenus
CG15344	X:0722	237	not annotated in Drosophila subgenus
CG15345	X:0724		not annotated in Drosophila subgenus
CG32711	X:0727		not annotated in Drosophila subgenus
CG33223	X:0737	241	not annotated in Drosophila subgenus
CG32714	X:0738	241	not annotated in Drosophila subgenus
CG1634	X:0740		outside of SB and not assembled in dpse
CG11219	X:0740		outside of SB and not assembled in dpse
CG12113	X:0741		outside of SB and not assembled in dpse
CG12112	X:0742		not annotated in Drosophila subgenus
CG2056	X:0745		outside of SB and not annotated in dgri
CG12081	X:0747	244	more complex explanation
CG12659	X:0747	244	more complex explanation
CG1795	X:0752		outside of SB and not annotated in dana, dpse
CG2004	X:0754	247	more complex explanation
CG32710	X:0758	249	not annotated in Drosophila subgenus
CG3898	X:0766	250	not annotated in Drosophila subgenus
CG32709	X:0768	250	not annotated in Drosophila subgenus
CG15364	X:0768	250	not annotated in Drosophila subgenus
CG15366	X:0773	251	not annotated in Drosophila subgenus
CG32708	X:0777		not annotated in Drosophila subgenus
CG32706	X:0778		not annotated in Drosophila subgenus
CG6999	X:0779		not annotated in Drosophila subgenus
CG8989	X:0789		not annotated in Drosophila subgenus
CG11042	X:0789		not annotated in Drosophila subgenus
CG17438	X:0814	268	not annotated in Drosophila subgenus
CG17440	X:0816		not annotated in Drosophila subgenus
CG12667	X:0821	271	not annotated in Drosophila subgenus
CG12149	X:0823		outside of SB and not assembled in dvir
CG12650	X:0828	272	not annotated in Drosophila subgenus
CG15316	X:0829	272	not annotated in Drosophila subgenus
CG34028	X:0830	272	not annotated in Drosophila subgenus
CG34026	X:0830	272	not annotated in Drosophila subgenus
CG15321	X:0844		not annotated in Drosophila subgenus
CG1468	X:0854	281	not annotated in Drosophila subgenus
CG2990	X:0867		more complex explanation
CG2972	X:0875		more complex explanation
CG2974	X:0875		outside of SB and not assembled in dana
CG12645	X:0878	284	not annotated in Drosophila subgenus
CG12644	X:0879	284	not annotated in Drosophila subgenus
CG32691	X:0880	284	not annotated in Drosophila subgenus
CG32690	X:0882	284	not annotated in Drosophila subgenus
CG2968	X:0884		outside of SB and not annotated in dpse
CG2962	X:0885		outside of SB and not annotated in dpse
CG15308	X:0886		not annotated in Drosophila subgenus
CG2967	X:0887		outside of SB and not annotated in dpse
CG32689	X:0887		outside of SB and not annotated in dpse
CG2961	X:0888		outside of SB and not annotated in dyak, dpse
CG32688	X:0889		outside of SB and not annotated in dpse
CG2909	X:0892		outside of SB and not annotated in dwil, dvir, dmoj
CG2227	X:0892		outside of SB and not annotated in dwil
CG32679	X:0897	286	not annotated in Drosophila subgenus
CG2885	X:0901	287	not annotated in Drosophila subgenus
CG12640	X:0901	287	not annotated in Drosophila subgenus
CG15296	X:0909	290	not annotated in Drosophila subgenus
CG9807	X:0915	291	not annotated in Drosophila subgenus
CG9806	X:0916	291	not annotated in Drosophila subgenus
CG2111	X:0917	291	not annotated in Drosophila subgenus
CG32673	X:0918	291	not annotated in Drosophila subgenus
CG1826	X:0925		outside of SB and not annotated in dwil
CG15211	X:0926		outside of SB and not annotated in dwil, dvir
CG1683	X:0926		outside of SB and not annotated in dere, dyak, dana, dwil, dvir
CG16944	X:0926		outside of SB and not annotated in dwil, dvir
CG15208	X:0937		not annotated in Drosophila subgenus
CG32671	X:0942	300	not annotated in Drosophila subgenus
CG32670	X:0942	300	not annotated in Drosophila subgenus
CG12101	X:0957		outside of SB and not annotated in dmoj
CG1394	X:0971	305	not annotated in Drosophila subgenus
CG15200	X:0972	305	not annotated in Drosophila subgenus
CG11106	X:0973	305	not annotated in Drosophila subgenus
CG11759	X:0982		outside of SB and not annotated in dvir, dmoj
CG11757	X:0983		outside of SB and not assembled in dpse
CG1597	X:0984		outside of SB and not assembled in dpse
CG11756	X:0985		not annotated in Drosophila subgenus
CG15196	X:0993		not annotated in Drosophila subgenus
CG12622	X:0994		not annotated in Drosophila subgenus
CG1749	X:1003		more complex explanation
CG1751	X:1004		more complex explanation
CG33235	X:1005		not annotated in Drosophila subgenus
CG1572	X:1007		outside of SB and not annotated in dwil
CG11709	X:1008	314	not annotated in Drosophila subgenus
CG1558	X:1009	315	not annotated in Drosophila subgenus
CG11695	X:1012		not annotated in Drosophila subgenus
CG1763	X:1013		not annotated in Drosophila subgenus
CG1561	X:1013		not annotated in Drosophila subgenus
CG2533	X:1014	317	not annotated in Drosophila subgenus
CG15741	X:1036		not annotated in Drosophila subgenus
CG1847	X:1043		outside of SB and not assembled in dana
CG11802	X:1044		outside of SB and not assembled in dana
CG15739	X:1045		outside of SB and not annotated in dmoj, dgri and not assembled in dana
CG10352	X:1046		outside of SB and not annotated in dmoj, dgri and not assembled in dana
CG10353	X:1047		outside of SB and not annotated in dmoj, dgri and not assembled in dana
CG1844	X:1048		outside of SB and not annotated in dmoj, dgri and not assembled in dana
CG1840	X:1049		not annotated in Drosophila subgenus
CG15738	X:1050		outside of SB and not assembled in dana
CG15737	X:1051		outside of SB and not assembled in dana
CG1559	X:1052		outside of SB and not assembled in dana
CG2467	X:1053		outside of SB and not assembled in dana
CG2471	X:1054		outside of SB and not assembled in dana
CG10362	X:1055		outside of SB and not assembled in dana
CG1522	X:1056		outside of SB and not assembled in dana
CG1505	X:1057		outside of SB and not assembled in dana
CG1502	X:1058		not annotated in Drosophila subgenus
CG18130	X:1059		outside of SB and not assembled in dana
CG1500	X:1060		outside of SB and not assembled in dana
CG1806	X:1061		outside of SB and not assembled in dana
CG1492	X:1061		not annotated in Drosophila subgenus
CG1488	X:1067		not annotated in Drosophila subgenus
CG1950	X:1069	334	not annotated in Drosophila subgenus
CG12721	X:1071	334	not annotated in Drosophila subgenus
CG15734	X:1072	334	not annotated in Drosophila subgenus
CG1924	X:1075	334	not annotated in Drosophila subgenus
CG32655	X:1078	334	not annotated in Drosophila subgenus
CG32651	X:1081	335	not annotated in Drosophila subgenus
CG32652	X:1083	335	not annotated in Drosophila subgenus
CG2559	X:1091	337	not annotated in Drosophila subgenus
CG17762	X:1107		not annotated in Drosophila subgenus
CG2028	X:1108		not annotated in Drosophila subgenus
CG12717	X:1113	346	not annotated in Drosophila subgenus
CG4661	X:1118		not annotated in Drosophila subgenus
CG33651	X:1119		not annotated in Drosophila subgenus
CG32643	X:1133	351	not annotated in Drosophila subgenus
CG2209	X:1135	351	not annotated in Drosophila subgenus
CG32645	X:1148		outside of SB and not annotated in dpse
CG4318	X:1149		not annotated in Drosophila subgenus
CG32640	X:1155	358	not annotated in Drosophila subgenus
CG32641	X:1156	358	not annotated in Drosophila subgenus
CG1903	X:1159		outside of SB and not annotated in dgri
CG32639	X:1161	360	not annotated in Drosophila subgenus
CG15742	X:1162	360	not annotated in Drosophila subgenus
CG32636	X:1173	366	not annotated in Drosophila subgenus
CG32634	X:1179	368	not annotated in Drosophila subgenus
CG12725	X:1184		not annotated in Drosophila subgenus
CG1681	X:1185		outside of SB and not annotated in dwil
CG1716	X:1187		outside of SB and not annotated in dvir, dmoj
CG12726	X:1188	370	not annotated in Drosophila subgenus
CG32629	X:1196	370	not annotated in Drosophila subgenus
CG15758	X:1197	370	not annotated in Drosophila subgenus
CG11177	X:1202		outside of SB and not annotated in dgri and not assembled in dpse
CG12175	X:1202		outside of SB and not assembled in dpse
CG11176	X:1203		outside of SB and not assembled in dpse
CG2691	X:1204		outside of SB and not assembled in dpse
CG11172	X:1205		outside of SB and not assembled in dpse
CG12176	X:1206		outside of SB and not assembled in dpse
CG11164	X:1207		outside of SB and not assembled in dpse
CG15760	X:1208		outside of SB and not assembled in dpse
CG11162	X:1209		not annotated in Drosophila subgenus
CG12177	X:1210		outside of SB and not annotated in dwil, dvir, dmoj
CG11158	X:1211		not annotated in Drosophila subgenus
CG9940	X:1211		more complex explanation
CG32627	X:1211		more complex explanation
CG32628	X:1211		more complex explanation
CG9941	X:1212		more complex explanation
CG10993	X:1223	379	not annotated in Drosophila subgenus
CG32606	X:1232	382	not annotated in Drosophila subgenus
CG32613	X:1233	382	not annotated in Drosophila subgenus
CG32616	X:1235	382	not annotated in Drosophila subgenus
CG33247	X:1236	382	not annotated in Drosophila subgenus
CG33246	X:1237	382	not annotated in Drosophila subgenus
CG33245	X:1238	382	not annotated in Drosophila subgenus
CG33244	X:1239	382	not annotated in Drosophila subgenus
CG33243	X:1240	382	not annotated in Drosophila subgenus
CG33242	X:1241	382	not annotated in Drosophila subgenus
CG33241	X:1242	382	not annotated in Drosophila subgenus
CG33240	X:1243	382	not annotated in Drosophila subgenus
CG33239	X:1244	382	not annotated in Drosophila subgenus
CG33238	X:1245	382	not annotated in Drosophila subgenus
CG33237	X:1246	382	not annotated in Drosophila subgenus
CG33236	X:1247	382	not annotated in Drosophila subgenus
CG12454	X:1248	382	not annotated in Drosophila subgenus
CG13402	X:1252	382	not annotated in Drosophila subgenus
CG9400	X:1275	389	not annotated in Drosophila subgenus
CG18157	X:1276	389	not annotated in Drosophila subgenus
CG32598	X:1277	389	not annotated in Drosophila subgenus
CG32601	X:1278	389	not annotated in Drosophila subgenus
CG18313	X:1278	389	not annotated in Drosophila subgenus
CG5310	X:1283		more complex explanation
CG9413	X:1284		more complex explanation
CG18657	X:1285		outside of SB and not annotated in dana
CG5321	X:1286		outside of SB and not annotated in dana, dpse
CG10521	X:1287		outside of SB and not assembled in dana
CG32595	X:1287		not annotated in Drosophila subgenus
CG15890	X:1288		outside of SB and not assembled in dana
CG5334	X:1289		not annotated in Drosophila subgenus
CG5347	X:1290		not annotated in Drosophila subgenus
CG9540	X:1291		outside of SB and not assembled in dana
CG9538	X:1292		outside of SB and not assembled in dana
CG9533	X:1293		outside of SB and not assembled in dana
CG14408	X:1294		outside of SB and not assembled in dana
CG14410	X:1296	390	not annotated in Drosophila subgenus
CG32590	X:1298		outside of SB and not annotated in dwil
CG14406	X:1299	391	not annotated in Drosophila subgenus
CG9504	X:1299	391	not annotated in Drosophila subgenus
CG32591	X:1299	391	not annotated in Drosophila subgenus
CG9030	X:1301		not annotated in Drosophila subgenus
CG5560	X:1306		not annotated in Drosophila subgenus
CG32588	X:1319	396	not annotated in Drosophila subgenus
CG15030	X:1321	396	not annotated in Drosophila subgenus
CG15031	X:1323	396	not annotated in Drosophila subgenus
CG6146	X:1328		outside of SB and not annotated in dwil
CG15641	X:1342	402	not annotated in Drosophila subgenus
CG6324	X:1346		not annotated in Drosophila subgenus
CG32584	X:1350	406	not annotated in Drosophila subgenus
CG7860	X:1350	406	more complex explanation
CG15643	X:1350	406	more complex explanation
CG32586	X:1356	409	not annotated in Drosophila subgenus
CG8117	X:1357		not annotated in Drosophila subgenus
CG8119	X:1358		not annotated in Drosophila subgenus
CG15599	X:1361	410	not annotated in Drosophila subgenus
CG8231	X:1374		outside of SB and not annotated in dpse
CG8239	X:1375		outside of SB and not annotated in dana, dpse
CG8948	X:1376		outside of SB and not annotated in dana, dpse
CG8260	X:1376		not annotated in Drosophila subgenus
CG8288	X:1377		outside of SB and not annotated in dana, dpse
CG17209	X:1378		outside of SB and not annotated in dpse
CG8952	X:1378		outside of SB and not annotated in dana, dpse
CG33172	X:1379		outside of SB and not annotated in dana, dpse and not assembled in dvir, dmoj
CG33173	X:1380		not annotated in Drosophila subgenus
CG8959	X:1381		not annotated in Drosophila subgenus
CG8962	X:1382		outside of SB and not annotated in dpse and not assembled in dana
CG8470	X:1383		outside of SB and not annotated in dpse, dwil
CG8497	X:1384		outside of SB and not annotated in dpse
CG8974	X:1384		outside of SB and not annotated in dana, dpse, dwil, dmoj and not assembled in dvir, dgri
CG32581	X:1385		outside of SB and not annotated in dere, dyak, dana, dpse, dvir, dgri
CG15602	X:1386		outside of SB and not annotated in dana, dpse
CG8995	X:1387		outside of SB and not annotated in dana, dpse, dwil
CG8509	X:1388		outside of SB and not annotated in dpse, dgri and not assembled in dana
CG8544	X:1389		outside of SB and not annotated in dpse, dgri
CG9012	X:1390		outside of SB and not annotated in dpse
CG32582	X:1391		not annotated in Drosophila subgenus
CG8565	X:1392		not annotated in Drosophila subgenus
CG9020	X:1393		outside of SB and not annotated in dpse and not assembled in dmoj
CG8578	X:1394		outside of SB and not annotated in dpse and not assembled in dana, dvir, dmoj
CG9032	X:1394		outside of SB and not annotated in dpse, dwil and not assembled in dana, dmoj, dgri
CG9038	X:1395		outside of SB and not annotated in dana, dpse, dvir and not assembled in dmoj
CG15914	X:1396		outside of SB and not annotated in dpse
CG9045	X:1397		outside of SB and not annotated in dana, dpse and not assembled in dvir, dmoj
CG33250	X:1398		outside of SB and not annotated in dpse, dvir and not assembled in dmoj
CG10545	X:1399		outside of SB and not annotated in dpse and not assembled in dvir, dmoj
CG8893	X:1400		not annotated in Drosophila subgenus
CG16952	X:1401		outside of SB and not annotated in dpse and not assembled in dana, dvir, dmoj
CG9056	X:1402		outside of SB and not annotated in dpse and not assembled in dvir, dmoj
CG9066	X:1403		not annotated in Drosophila subgenus
CG15916	X:1404		outside of SB and not annotated in dpse, dmoj
CG18102	X:1405		outside of SB and not annotated in dpse
CG9096	X:1406		outside of SB and not annotated in dana, dpse, dmoj and not assembled in dvir
CG8909	X:1407		outside of SB and not annotated in dpse
CG8916	X:1408		outside of SB and not annotated in dana, dpse
CG17336	X:1409		outside of SB and not annotated in dana, dpse
CG33180	X:1410		outside of SB and not annotated in dpse and not assembled in dvir, dmoj
CG9126	X:1411		outside of SB and not annotated in dpse and not assembled in dvir, dmoj
CG8924	X:1412		outside of SB and not annotated in dpse, dwil, dvir
CG8928	X:1413		outside of SB and not annotated in dpse, dmoj, dgri and not assembled in dvir
CG15603	X:1414		outside of SB and not annotated in dpse and not assembled in dana
CG15604	X:1415		outside of SB and not annotated in dpse and not assembled in dana
CG9163	X:1416		outside of SB and not annotated in dpse and not assembled in dana
CG12697	X:1417		outside of SB and not annotated in dwil, dmoj, dgri and not assembled in dvir
CG9170	X:1418		outside of SB and not annotated in dana, dpse
CG8931	X:1419		not annotated in Drosophila subgenus
CG9172	X:1420		not annotated in Drosophila subgenus
CG9177	X:1421		more complex explanation
CG8933	X:1422		outside of SB and not annotated in dana, dpse
CG8939	X:1423		outside of SB and not annotated in dpse
CG9209	X:1424		outside of SB and not annotated in dana, dpse
CG12698	X:1425		outside of SB and not annotated in dana
CG32580	X:1426		not annotated in Drosophila subgenus
CG12395	X:1427		outside of SB and not assembled in dana
CG14948	X:1428		outside of SB and not annotated in dana
CG9212	X:1429		outside of SB and not assembled in dana
CG9214	X:1430		outside of SB and not annotated in dana
CG8958	X:1431		outside of SB and not annotated in dana
CG9216	X:1432		outside of SB and not assembled in dana
CG32577	X:1433		outside of SB and not assembled in dana
CG9908	X:1434		outside of SB and not assembled in dana
CG12507	X:1435		outside of SB and not assembled in dana
CG13956	X:1436		outside of SB and not assembled in dana
CG3415	X:1436		outside of SB and not assembled in dana
CG3422	X:1437		outside of SB and not annotated in dpse and not assembled in dana
CG3525	X:1438		outside of SB and not assembled in dana
CG32576	X:1439		outside of SB and not assembled in dana
CG3560	X:1439		outside of SB and not assembled in dana
CG3606	X:1440		outside of SB and not assembled in dana
CG9911	X:1441		outside of SB and not annotated in dyak and not assembled in dana
CG3632	X:1442		outside of SB and not annotated in dyak and not assembled in dana
CG3679	X:1443		outside of SB and not annotated in dyak and not assembled in dana
CG9914	X:1444		outside of SB and not annotated in dyak and not assembled in dana
CG9915	X:1445		outside of SB and not assembled in dana
CG33251	X:1446		outside of SB and not assembled in dana
CG13957	X:1447		outside of SB and not assembled in dana
CG9916	X:1448		outside of SB and not assembled in dana
CG9917	X:1449		outside of SB and not assembled in dana
CG32579	X:1450		outside of SB and not assembled in dana
CG3692	X:1451		outside of SB and not assembled in dana
CG9919	X:1451		outside of SB and not assembled in dana
CG9921	X:1452		outside of SB and not assembled in dana
CG12223	X:1453		outside of SB and not assembled in dana
CG4200	X:1454		outside of SB and not assembled in dana
CG9998	X:1455		outside of SB and not assembled in dana
CG32578	X:1456		outside of SB and not assembled in dana
CG4211	X:1457		outside of SB and not assembled in dana
CG18734	X:1458		outside of SB and not assembled in dana
CG9992	X:1459		outside of SB and not assembled in dana
CG4239	X:1460		outside of SB and not assembled in dana
CG9984	X:1461		outside of SB and not assembled in dana
CG4252	X:1462		more complex explanation
CG9981	X:1463		outside of SB and not assembled in dana
CG4301	X:1464		outside of SB and not assembled in dana
CG4394	X:1465		outside of SB and not assembled in dana
CG9968	X:1465		outside of SB and not assembled in dana
CG34015	X:1470	419	not annotated in Drosophila subgenus
CG9906	X:1472	419	not annotated in Drosophila subgenus
CG9903	X:1473		not annotated in Drosophila subgenus
CG9902	X:1474		not annotated in Drosophila subgenus
CG9901	X:1475		not annotated in Drosophila subgenus
CG9842	X:1476		not annotated in Drosophila subgenus
CG9819	X:1477		not annotated in Drosophila subgenus
CG4443	X:1480		not annotated in Drosophila subgenus
CG4453	X:1482		outside of SB and not annotated in dvir
CG9777	X:1485	425	not annotated in Drosophila subgenus
CG32573	X:1489	428	not annotated in Drosophila subgenus
CG13012	X:1490	429	more complex explanation
CG13010	X:1491		not annotated in Drosophila subgenus
CG9699	X:1494		outside of SB and not annotated in dwil
CG4678	X:1495		not annotated in Drosophila subgenus
CG9676	X:1495		not annotated in Drosophila subgenus
CG9675	X:1495		not annotated in Drosophila subgenus
CG9673	X:1495		not annotated in Drosophila subgenus
CG4653	X:1495		not annotated in Drosophila subgenus
CG9672	X:1495		not annotated in Drosophila subgenus
CG32568	X:1498	431	not annotated in Drosophila subgenus
CG9606	X:1502	434	more complex explanation
CG4789	X:1505		outside of SB and not annotated in dwil, dvir, dmoj
CG9125	X:1506		outside of SB and not annotated in dwil, dvir, dmoj
CG13004	X:1510		outside of SB and not assembled in dpse
CG9108	X:1511		outside of SB and not annotated in dana and not assembled in dpse
CG13003	X:1512		outside of SB and not assembled in dpse
CG4872	X:1513		outside of SB and not annotated in dwil and not assembled in dpse
CG9104	X:1513		outside of SB and not assembled in dpse
CG4875	X:1514		outside of SB and not assembled in dana, dpse
CG9099	X:1514		outside of SB and not assembled in dpse
CG4880	X:1515		outside of SB and not assembled in dpse
CG13002	X:1516		outside of SB and not assembled in dpse
CG33252	X:1517		not annotated in Drosophila subgenus
CG4928	X:1518		outside of SB and not assembled in dpse
CG9089	X:1519		outside of SB and not assembled in dpse
CG13001	X:1520		outside of SB and not assembled in dpse
CG13000	X:1521		not annotated in Drosophila subgenus
CG4937	X:1522		outside of SB and not assembled in dpse
CG9086	X:1523		outside of SB and not assembled in dpse
CG12433	X:1525	438	not annotated in Drosophila subgenus
CG32561	X:1536	443	not annotated in Drosophila subgenus
CG32563	X:1542	444	not annotated in Drosophila subgenus
CG8661	X:1556		not annotated in Drosophila subgenus
CG12991	X:1570		outside of SB and not annotated in dwil
CG12992	X:1570		not annotated in Drosophila subgenus
CG5675	X:1571		outside of SB and not annotated in dwil
CG8326	X:1573	450	not annotated in Drosophila subgenus
CG6398	X:1590		outside of SB and not annotated in dmoj
CG6474	X:1591		more complex explanation
CG8142	X:1591		more complex explanation
CG7835	X:1598	459	not annotated in Drosophila subgenus
CG6788	X:1599		not annotated in Drosophila subgenus
CG6835	X:1600		not annotated in Drosophila subgenus
CG32496	X:1601		not annotated in Drosophila subgenus
CG32494	X:1606	461	not annotated in Drosophila subgenus
CG15911	X:1608	461	not annotated in Drosophila subgenus
CG32552	X:1610		not annotated in Drosophila subgenus
CG7135	X:1618		not annotated in Drosophila subgenus
CG12612	X:1620		not annotated in Drosophila subgenus
CG32553	X:1621		not annotated in Drosophila subgenus
CG15060	X:1629	469	not annotated in Drosophila subgenus
CG15059	X:1631	469	not annotated in Drosophila subgenus
CG15058	X:1632	469	not annotated in Drosophila subgenus
CG15057	X:1633	469	not annotated in Drosophila subgenus
CG15061	X:1635	469	not annotated in Drosophila subgenus
CG6179	X:1641	469	more complex explanation
CG15056	X:1645	471	not annotated in Drosophila subgenus
CG6318	X:1656		not annotated in Drosophila subgenus
CG6407	X:1657		outside of SB and not annotated in dana, dpse
CG6481	X:1661	473	not annotated in Drosophila subgenus
CG15042	X:1662	473	not annotated in Drosophila subgenus
CG6531	X:1666		outside of SB and not annotated in dpse
CG6585	X:1674	476	not annotated in Drosophila subgenus
CG6900	X:1679		not annotated in Drosophila subgenus
CG6961	X:1680		not annotated in Drosophila subgenus
CG7001	X:1681		outside of SB and not annotated in dvir, dmoj
CG7053	X:1681		outside of SB and not annotated in dvir and not assembled in dmoj
CG7088	X:1681		not annotated in Drosophila subgenus
CG7058	X:1682		outside of SB and not annotated in dvir and not assembled in dmoj
CG7095	X:1683		outside of SB and not assembled in dvir
CG32543	X:1684		outside of SB and not assembled in dvir
CG7358	X:1697		outside of SB and not annotated in dmoj
CG14189	X:1701	482	not annotated in Drosophila subgenus
CG14190	X:1702	482	not annotated in Drosophila subgenus
CG33254	X:1703	482	not annotated in Drosophila subgenus
CG7406	X:1704	482	not annotated in Drosophila subgenus
CG14191	X:1705	482	not annotated in Drosophila subgenus
CG7423	X:1706	482	not annotated in Drosophila subgenus
CG15882	X:1707	482	not annotated in Drosophila subgenus
CG7453	X:1713		outside of SB and not annotated in dmoj, dgri
CG33253	X:1714		outside of SB and not annotated in dmoj, dgri
CG14193	X:1716	484	not annotated in Drosophila subgenus
CG32538	X:1736		not annotated in Drosophila subgenus
CG32827	X:1737	494	not annotated in Drosophila subgenus
CG12200	X:1738	494	not annotated in Drosophila subgenus
CG14218	X:1753		outside of SB and not annotated in dpse, dwil, dgri
CG14204	X:1754		not annotated in Drosophila subgenus
CG14219	X:1755		outside of SB and not annotated in dere, dpse, dwil
CG14205	X:1756		outside of SB and not annotated in dwil
CG14209	X:1760	501	not annotated in Drosophila subgenus
CG14221	X:1762		not annotated in Drosophila subgenus
CG14227	X:1779	509	not annotated in Drosophila subgenus
CG12700	X:1796	516	not annotated in Drosophila subgenus
CG11941	X:1797	516	not annotated in Drosophila subgenus
CG11942	X:1798	516	not annotated in Drosophila subgenus
CG15618	X:1801		more complex explanation
CG11937	X:1802	518	not annotated in Drosophila subgenus
CG32821	X:1803		not annotated in Drosophila subgenus
CG9570	X:1808	519	not annotated in Drosophila subgenus
CG9571	X:1809	519	not annotated in Drosophila subgenus
CG32825	X:1810	519	not annotated in Drosophila subgenus
CG15323	X:1811	519	not annotated in Drosophila subgenus
CG12656	X:1812	519	not annotated in Drosophila subgenus
CG32824	X:1814	519	not annotated in Drosophila subgenus
CG9579	X:1820	520	more complex explanation
CG9580	X:1821		not annotated in Drosophila subgenus
CG33491	X:1822		not annotated in Drosophila subgenus
CG33497	X:1823		not annotated in Drosophila subgenus
CG33496	X:1824		not annotated in Drosophila subgenus
CG32823	X:1825		not annotated in Drosophila subgenus
CG33487	X:1826		not annotated in Drosophila subgenus
CG33499	X:1827		not annotated in Drosophila subgenus
CG33498	X:1828		not annotated in Drosophila subgenus
CG1631	X:1835		not annotated in Drosophila subgenus
CG15462	X:1836		not annotated in Drosophila subgenus
CG12679	X:1837		not annotated in Drosophila subgenus
CG15460	X:1838		not annotated in Drosophila subgenus
CG15461	X:1854	529	not annotated in Drosophila subgenus
CG32504	X:1857		not annotated in Drosophila subgenus
CG11692	X:1862	530	not annotated in Drosophila subgenus
CG1835	X:1864	530	not annotated in Drosophila subgenus
CG1338	X:1864	530	not annotated in Drosophila subgenus
CG1324	X:1866	530	not annotated in Drosophila subgenus
CG32507	X:1868	530	not annotated in Drosophila subgenus
CG1314	X:1871	530	not annotated in Drosophila subgenus
CG11235	X:1872	530	not annotated in Drosophila subgenus
CG32509	X:1874	530	not annotated in Drosophila subgenus
CG11230	X:1875	530	not annotated in Drosophila subgenus
CG11666	X:1881	530	not annotated in Drosophila subgenus
CG1529	X:1884		more complex explanation
CG1740	X:1885		not annotated in Drosophila subgenus
CG15449	X:1886		not annotated in Drosophila subgenus
CG1742	X:1887		not annotated in Drosophila subgenus
CG32510	X:1887		not annotated in Drosophila subgenus
CG1753	X:1888		more complex explanation
CG10987	X:1890	532	not annotated in Drosophila subgenus
CG15446	X:1891	532	not annotated in Drosophila subgenus
CG1503	X:1891	532	not annotated in Drosophila subgenus
CG32511	X:1895		not annotated in Drosophila subgenus
CG14579	X:1896		not annotated in Drosophila subgenus
CG1724	X:1897		not annotated in Drosophila subgenus
CG32523	X:1898	534	not annotated in Drosophila subgenus
CG14580	X:1898	534	not annotated in Drosophila subgenus
CG1722	X:1898	534	not annotated in Drosophila subgenus
CG14581	X:1898	534	not annotated in Drosophila subgenus
CG1666	X:1913		more complex explanation
CG1678	X:1916	540	not annotated in Drosophila subgenus
CG34019	X:1917	540	not annotated in Drosophila subgenus
CG10918	X:1918	540	not annotated in Drosophila subgenus
CG14584	X:1922		not annotated in Drosophila subgenus
CG1644	X:1923		not annotated in Drosophila subgenus
CG32822	X:1924		not annotated in Drosophila subgenus
CG33502	X:1927		not annotated in Drosophila subgenus
CG32820	X:1928		not annotated in Drosophila subgenus
CG32857	X:1929		not annotated in Drosophila subgenus
CG32819	X:1930		not annotated in Drosophila subgenus
CG32500	X:1931		outside of SB and not annotated in dpse, dwil, dvir
CG17686	X:1932		outside of SB and not annotated in dana, dwil, dvir
CG14621	X:1933		outside of SB and not annotated in dwil
CG14615	X:1934		outside of SB and not annotated in dwil
CG14618	X:1939	544	more complex explanation
CG17601	X:1944		outside of SB and not annotated in dpse, dwil, dmoj, dgri
CG32499	X:1945		outside of SB and not annotated in dwil, dmoj, dgri
CG12446	X:1946		outside of SB and not annotated in dwil, dmoj, dgri
CG9559	X:1947		outside of SB and not annotated in dwil, dmoj, dgri
CG11023	2L:0001		not annotated in Drosophila subgenus
CG2657	2L:0003		more complex explanation
CG31973	2L:0004		outside of SB and not assembled in dwil
CG11371	2L:0005		outside of SB and not assembled in dwil
CG11372	2L:0006		outside of SB and not assembled in dwil
CG11374	2L:0007		outside of SB and not assembled in dwil
CG11450	2L:0008		outside of SB and not assembled in dwil
CG11376	2L:0009		outside of SB and not assembled in dwil
CG13694	2L:0012		not annotated in Drosophila subgenus
CG3645	2L:0031		outside of SB and not assembled in dwil
CG17075	2L:0031		outside of SB and not assembled in dwil
CG3345	2L:0031		outside of SB and not assembled in dwil
CG11604	2L:0032		outside of SB and not assembled in dwil
CG11555	2L:0032		outside of SB and not assembled in dwil
CG17078	2L:0033		outside of SB and not assembled in dwil
CG11601	2L:0034	554	not annotated in Drosophila subgenus
CG13689	2L:0073		not annotated in Drosophila subgenus
CG13686	2L:0074		not annotated in Drosophila subgenus
CG2826	2L:0075		not annotated in Drosophila subgenus
CG2839	2L:0076		not annotated in Drosophila subgenus
CG2830	2L:0078	567	not annotated in Drosophila subgenus
CG12506	2L:0081	567	not annotated in Drosophila subgenus
CG13946	2L:0082	567	not annotated in Drosophila subgenus
CG13947	2L:0083	567	not annotated in Drosophila subgenus
CG31658	2L:0086		not annotated in Drosophila subgenus
CG11297	2L:0102	571	not annotated in Drosophila subgenus
CG4178	2L:0103	571	not annotated in Drosophila subgenus
CG31923	2L:0105	571	not annotated in Drosophila subgenus
CG4375	2L:0106	572	not annotated in Drosophila subgenus
CG34016	2L:0109	574	not annotated in Drosophila subgenus
CG4715	2L:0114	575	not annotated in Drosophila subgenus
CG5126	2L:0125	577	more complex explanation
CG5011	2L:0129	577	not annotated in Drosophila subgenus
CG14343	2L:0131	577	not annotated in Drosophila subgenus
CG5156	2L:0132	577	not annotated in Drosophila subgenus
CG5440	2L:0136	577	not annotated in Drosophila subgenus
CG33923	2L:0137	577	not annotated in Drosophila subgenus
CG33922	2L:0138	577	not annotated in Drosophila subgenus
CG31924	2L:0141	577	not annotated in Drosophila subgenus
CG31925	2L:0147	577	not annotated in Drosophila subgenus
CG31926	2L:0150	577	not annotated in Drosophila subgenus
CG31661	2L:0151	577	not annotated in Drosophila subgenus
CG18132	2L:0154		not annotated in Drosophila subgenus
CG10869	2L:0158	578	more complex explanation
CG14352	2L:0159	578	not annotated in Drosophila subgenus
CG31934	2L:0161	579	not annotated in Drosophila subgenus
CG31932	2L:0172	583	not annotated in Drosophila subgenus
CG17650	2L:0173	583	not annotated in Drosophila subgenus
CG31936	2L:0174	583	not annotated in Drosophila subgenus
CG31929	2L:0175	583	not annotated in Drosophila subgenus
CG31931	2L:0176	583	not annotated in Drosophila subgenus
CG31933	2L:0178	583	not annotated in Drosophila subgenus
CG31664	2L:0179	583	not annotated in Drosophila subgenus
CG15358	2L:0183	583	not annotated in Drosophila subgenus
CG15357	2L:0185		not annotated in Drosophila subgenus
CG31941	2L:0193		not annotated in Drosophila subgenus
CG31672	2L:0200	587	not annotated in Drosophila subgenus
CG4259	2L:0203		not annotated in Drosophila subgenus
CG15383	2L:0209	591	not annotated in Drosophila subgenus
CG31668	2L:0211	591	not annotated in Drosophila subgenus
CG33124	2L:0212	591	not annotated in Drosophila subgenus
CG31686	2L:0225	594	not annotated in Drosophila subgenus
CG17234	2L:0228	594	not annotated in Drosophila subgenus
CG17012	2L:0229	594	not annotated in Drosophila subgenus
CG34049	2L:0231	594	not annotated in Drosophila subgenus
CG17242	2L:0232	594	not annotated in Drosophila subgenus
CG4271	2L:0233	594	not annotated in Drosophila subgenus
CG31681	2L:0234	594	not annotated in Drosophila subgenus
CG31949	2L:0237	594	not annotated in Drosophila subgenus
CG31948	2L:0251	596	not annotated in Drosophila subgenus
CG3240	2L:0262		more complex explanation
CG15394	2L:0268	598	not annotated in Drosophila subgenus
CG2859	2L:0285	600	not annotated in Drosophila subgenus
CG2964	2L:0290		not annotated in Drosophila subgenus
CG3123	2L:0293	603	not annotated in Drosophila subgenus
CG18557	2L:0298	603	not annotated in Drosophila subgenus
CG3117	2L:0299	603	not annotated in Drosophila subgenus
CG18627	2L:0307	607	more complex explanation
CG3181	2L:0310		outside of SB and not annotated in dwil
CG9641	2L:0312	610	not annotated in Drosophila subgenus
CG9643	2L:0314		outside of SB and not annotated in dgri
CG17224	2L:0319	613	not annotated in Drosophila subgenus
CG17223	2L:0320	613	more complex explanation
CG17261	2L:0329		not annotated in Drosophila subgenus
CG8822	2L:0332	619	not annotated in Drosophila subgenus
CG15403	2L:0332	619	not annotated in Drosophila subgenus
CG31953	2L:0336		not annotated in Drosophila subgenus
CG18555	2L:0338		not annotated in Drosophila subgenus
CG3485	2L:0339		not annotated in Drosophila subgenus
CG31698	2L:0340		not annotated in Drosophila subgenus
CG15404	2L:0341		not annotated in Drosophila subgenus
CG8829	2L:0342		not annotated in Drosophila subgenus
CG15405	2L:0343		not annotated in Drosophila subgenus
CG3347	2L:0344		not annotated in Drosophila subgenus
CG3332	2L:0345		not annotated in Drosophila subgenus
CG9664	2L:0346		outside of SB and not annotated in dwil
CG9663	2L:0347		outside of SB and not annotated in dwil
CG8838	2L:0357	623	not annotated in Drosophila subgenus
CG15411	2L:0359		not annotated in Drosophila subgenus
CG8840	2L:0363	625	not annotated in Drosophila subgenus
CG31952	2L:0363	625	not annotated in Drosophila subgenus
CG31776	2L:0372	628	not annotated in Drosophila subgenus
CG31956	2L:0373	628	not annotated in Drosophila subgenus
CG3212	2L:0382	629	not annotated in Drosophila subgenus
CG31955	2L:0403	630	not annotated in Drosophila subgenus
CG3410	2L:0405	630	not annotated in Drosophila subgenus
CG31960	2L:0411		not annotated in Drosophila subgenus
CG31958	2L:0412		not annotated in Drosophila subgenus
CG3920	2L:0414		outside of SB and not assembled in dgri
CG4099	2L:0428	633	not annotated in Drosophila subgenus
CG2955	2L:0429	633	not annotated in Drosophila subgenus
CG2958	2L:0432	633	not annotated in Drosophila subgenus
CG3675	2L:0438	636	not annotated in Drosophila subgenus
CG12677	2L:0451	641	not annotated in Drosophila subgenus
CG15436	2L:0462		not annotated in Drosophila subgenus
CG15636	2L:0464	649	not annotated in Drosophila subgenus
CG15635	2L:0465	649	not annotated in Drosophila subgenus
CG3047	2L:0494		not annotated in Drosophila subgenus
CG8871	2L:0497		not annotated in Drosophila subgenus
CG8869	2L:0498		not annotated in Drosophila subgenus
CG8867	2L:0499		not annotated in Drosophila subgenus
CG31917	2L:0512		outside of SB and not assembled in dwil
CG31918	2L:0520	669	not annotated in Drosophila subgenus
CG6081	2L:0530		not annotated in Drosophila subgenus
CG10833	2L:0531		not annotated in Drosophila subgenus
CG7742	2L:0531		outside of SB and not annotated in dgri and not assembled in dwil
CG14034	2L:0532		outside of SB and not annotated in dpse, dwil, dmoj, dgri
CG6514	2L:0533		outside of SB and not assembled in dwil, dvir, dmoj
CG14026	2L:0533		outside of SB and not assembled in dwil
CG14033	2L:0533		not annotated in Drosophila subgenus
CG14032	2L:0534		outside of SB and not annotated in dwil, dvir, dmoj
CG17970	2L:0535		not annotated in Drosophila subgenus
CG14031	2L:0536		not annotated in Drosophila subgenus
CG14027	2L:0543	676	not annotated in Drosophila subgenus
CG31647	2L:0548	678	not annotated in Drosophila subgenus
CG6907	2L:0553		more complex explanation
CG14017	2L:0561	681	not annotated in Drosophila subgenus
CG31913	2L:0577	683	not annotated in Drosophila subgenus
CG9029	2L:0585	684	not annotated in Drosophila subgenus
CG9024	2L:0586	684	not annotated in Drosophila subgenus
CG8982	2L:0587	684	not annotated in Drosophila subgenus
CG14000	2L:0589	685	not annotated in Drosophila subgenus
CG9016	2L:0590	685	not annotated in Drosophila subgenus
CG9162	2L:0627		not annotated in Drosophila subgenus
CG5972	2L:0631	688	more complex explanation
CG13989	2L:0637	689	not annotated in Drosophila subgenus
CG13988	2L:0638	689	not annotated in Drosophila subgenus
CG9500	2L:0651	689	not annotated in Drosophila subgenus
CG9531	2L:0666		outside of SB and not annotated in dgri
CG34009	2L:0684		not annotated in Drosophila subgenus
CG11053	2L:0685		not annotated in Drosophila subgenus
CG31634	2L:0686		outside of SB and not annotated in dmoj
CG31633	2L:0689		not annotated in Drosophila subgenus
CG11322	2L:0704	701	not annotated in Drosophila subgenus
CG17376	2L:0709		not annotated in Drosophila subgenus
CG32828	2L:0713	702	not annotated in Drosophila subgenus
CG10354	2L:0720	703	more complex explanation
CG31907	2L:0742	711	not annotated in Drosophila subgenus
CG31909	2L:0756	713	not annotated in Drosophila subgenus
CG13785	2L:0757	713	not annotated in Drosophila subgenus
CG15818	2L:0768	714	not annotated in Drosophila subgenus
CG6641	2L:0779		not annotated in Drosophila subgenus
CG6717	2L:0783	717	not annotated in Drosophila subgenus
CG6730	2L:0784	717	not annotated in Drosophila subgenus
CG33296	2L:0792	720	not annotated in Drosophila subgenus
CG13793	2L:0793	720	not annotated in Drosophila subgenus
CG13794	2L:0794	720	not annotated in Drosophila subgenus
CG13795	2L:0795	720	not annotated in Drosophila subgenus
CG7171	2L:0805		outside of SB and not annotated in dvir, dgri
CG7106	2L:0819	727	not annotated in Drosophila subgenus
CG31902	2L:0824	727	not annotated in Drosophila subgenus
CG33121	2L:0825	727	not annotated in Drosophila subgenus
CG14532	2L:0827	727	not annotated in Drosophila subgenus
CG7224	2L:0832		outside of SB and not annotated in dwil
CG7221	2L:0832		outside of SB and not annotated in dwil
CG7219	2L:0833		outside of SB and not annotated in dwil
CG12560	2L:0834		outside of SB and not annotated in dwil
CG34010	2L:0835		outside of SB and not annotated in dwil
CG18780	2L:0842	732	more complex explanation
CG8673	2L:0847		not annotated in Drosophila subgenus
CG12375	2L:0847		outside of SB and not annotated in dpse
CG31606	2L:0849	734	not annotated in Drosophila subgenus
CG8137	2L:0865	738	not annotated in Drosophila subgenus
CG13394	2L:0890	748	not annotated in Drosophila subgenus
CG17797	2L:0891	748	not annotated in Drosophila subgenus
CG17799	2L:0892	748	not annotated in Drosophila subgenus
CG31893	2L:0893	748	not annotated in Drosophila subgenus
CG13385	2L:0895	748	not annotated in Drosophila subgenus
CG31898	2L:0897	749	not annotated in Drosophila subgenus
CG31894	2L:0901	750	not annotated in Drosophila subgenus
CG33194	2L:0910	753	not annotated in Drosophila subgenus
CG13088	2L:0912	753	not annotated in Drosophila subgenus
CG13095	2L:0913	753	not annotated in Drosophila subgenus
CG13091	2L:0918	755	not annotated in Drosophila subgenus
CG9463	2L:0932	760	not annotated in Drosophila subgenus
CG9465	2L:0933	760	not annotated in Drosophila subgenus
CG9466	2L:0934	760	not annotated in Drosophila subgenus
CG9468	2L:0935	760	not annotated in Drosophila subgenus
CG32988	2L:0939	760	not annotated in Drosophila subgenus
CG9573	2L:0960	763	not annotated in Drosophila subgenus
CG18241	2L:0964	763	not annotated in Drosophila subgenus
CG31887	2L:0967	763	not annotated in Drosophila subgenus
CG17011	2L:0972	763	not annotated in Drosophila subgenus
CG3748	2L:0977		not annotated in Drosophila subgenus
CG13110	2L:0978		not annotated in Drosophila subgenus
CG4438	2L:0982	765	not annotated in Drosophila subgenus
CG33723	2L:0988	766	not annotated in Drosophila subgenus
CG31883	2L:0992	768	not annotated in Drosophila subgenus
CG31709	2L:0999	771	not annotated in Drosophila subgenus
CG31882	2L:1005		not annotated in Drosophila subgenus
CG31710	2L:1010	773	not annotated in Drosophila subgenus
CG4105	2L:1013	773	not annotated in Drosophila subgenus
CG18854	2L:1021	774	not annotated in Drosophila subgenus
CG31880	2L:1024	775	not annotated in Drosophila subgenus
CG33300	2L:1029		not annotated in Drosophila subgenus
CG13130	2L:1047	780	not annotated in Drosophila subgenus
CG31875	2L:1048	780	not annotated in Drosophila subgenus
CG13127	2L:1053	780	not annotated in Drosophila subgenus
CG33301	2L:1055	780	not annotated in Drosophila subgenus
CG13135	2L:1064	780	not annotated in Drosophila subgenus
CG13137	2L:1069	780	not annotated in Drosophila subgenus
CG31874	2L:1070	780	not annotated in Drosophila subgenus
CG5739	2L:1073		not annotated in Drosophila subgenus
CG5734	2L:1074		outside of SB and not annotated in dmoj
CG5731	2L:1075		not annotated in Drosophila subgenus
CG5727	2L:1076		outside of SB and not annotated in dpse and not assembled in dwil
CG4901	2L:1077		not annotated in Drosophila subgenus
CG5722	2L:1078		not annotated in Drosophila subgenus
CG4904	2L:1079		outside of SB and not annotated in dpse, dwil, dgri and not assembled in dvir
CG4908	2L:1080		outside of SB and not annotated in dwil and not assembled in dvir
CG5708	2L:1081		outside of SB and not annotated in dwil, dvir
CG5694	2L:1082		outside of SB and not annotated in dpse
CG4912	2L:1083		not annotated in Drosophila subgenus
CG31720	2L:1084		outside of SB and not annotated in dpse, dwil, dvir, dmoj
CG4916	2L:1085		outside of SB and not annotated in dpse, dwil
CG5686	2L:1086		outside of SB and not annotated in dpse, dwil, dvir
CG5680	2L:1087		outside of SB and not annotated in dpse and not assembled in dwil
CG31717	2L:1088		outside of SB and not assembled in dwil
CG4926	2L:1089		outside of SB and not annotated in dpse, dmoj and not assembled in dwil
CG5676	2L:1089		outside of SB and not annotated in dpse, dwil, dmoj and not assembled in dvir, dgri
CG5671	2L:1090		outside of SB and not annotated in dpse
CG5655	2L:1091		outside of SB and not annotated in dpse and not assembled in dwil
CG18619	2L:1092		outside of SB and not annotated in dpse, dvir and not assembled in dwil
CG4946	2L:1093		outside of SB and not annotated in dpse, dwil, dmoj, dgri
CG4953	2L:1094		outside of SB and not annotated in dpse and not assembled in dwil
CG4957	2L:1095		outside of SB and not annotated in dpse, dwil, dmoj, dgri
CG31873	2L:1096		outside of SB and not annotated in dpse and not assembled in dwil
CG5619	2L:1096		outside of SB and not annotated in dpse and not assembled in dwil, dvir
CG5640	2L:1097		outside of SB and not assembled in dwil
CG34043	2L:1098		not annotated in Drosophila subgenus
CG5604	2L:1099		outside of SB and not annotated in dpse and not assembled in dwil
CG18144	2L:1100		outside of SB and not annotated in dpse, dgri and not assembled in dwil
CG5603	2L:1101		outside of SB and not assembled in dwil
CG13138	2L:1102		outside of SB and not annotated in dpse, dwil, dgri
CG5395	2L:1103		outside of SB and not annotated in dpse, dwil, dmoj, dgri
CG5390	2L:1104		outside of SB and not annotated in dpse, dwil, dgri
CG4968	2L:1105		outside of SB and not annotated in dpse, dmoj and not assembled in dwil
CG5387	2L:1106		outside of SB and not annotated in dpse and not assembled in dwil, dvir
CG5385	2L:1107		outside of SB and not annotated in dpse, dwil, dmoj, dgri
CG5384	2L:1108		outside of SB and not assembled in dwil
CG4972	2L:1109		outside of SB and not annotated in dpse, dmoj and not assembled in dwil, dvir
CG5381	2L:1109		not annotated in Drosophila subgenus
CG4995	2L:1110		outside of SB and not annotated in dpse, dwil, dvir, dmoj
CG5371	2L:1111		outside of SB and not annotated in dpse and not assembled in dwil, dvir
CG5375	2L:1112		not annotated in Drosophila subgenus
CG5037	2L:1113		outside of SB and not annotated in dpse and not assembled in dwil
CG5034	2L:1114		outside of SB and not annotated in dpse, dwil, dvir
CG5029	2L:1115		outside of SB and not annotated in dpse, dwil
CG31715	2L:1116		not annotated in Drosophila subgenus
CG5025	2L:1117		outside of SB and not annotated in dpse, dwil, dvir, dmoj
CG5022	2L:1118		outside of SB and not annotated in dpse, dwil, dvir, dmoj
CG13141	2L:1119		outside of SB and not annotated in dwil, dmoj, dgri
CG5369	2L:1120		outside of SB and not annotated in dpse, dwil, dmoj, dgri
CG5367	2L:1121		not annotated in Drosophila subgenus
CG5045	2L:1122		outside of SB and not annotated in dpse
CG5366	2L:1123		outside of SB and not annotated in dpse
CG5052	2L:1124		not annotated in Drosophila subgenus
CG13139	2L:1125		outside of SB and not annotated in dpse
CG5056	2L:1126		outside of SB and not assembled in dwil
CG33304	2L:1127		outside of SB and not annotated in dwil
CG33303	2L:1128		outside of SB and not annotated in dpse and not assembled in dwil, dvir
CG13140	2L:1129		outside of SB and not annotated in dwil, dvir, dmoj
CG5091	2L:1130		not annotated in Drosophila subgenus
CG5096	2L:1130		outside of SB and not annotated in dpse, dvir
CG5363	2L:1131		outside of SB and not annotated in dpse and not assembled in dwil, dvir
CG5108	2L:1132		outside of SB and not annotated in dpse, dmoj and not assembled in dwil, dvir
CG5102	2L:1133		outside of SB and not annotated in dpse and not assembled in dwil, dvir
CG5362	2L:1134		outside of SB and not annotated in dpse, dwil
CG31716	2L:1135		outside of SB and not annotated in dpse and not assembled in dwil
CG17768	2L:1136		not annotated in Drosophila subgenus
CG33677	2L:1136		outside of SB and not annotated in dpse and not assembled in dwil
CG31718	2L:1137		outside of SB and not annotated in dpse, dmoj, dgri
CG5271	2L:1138		outside of SB and not annotated in dpse and not assembled in dwil
CG5277	2L:1138		outside of SB and not annotated in dpse and not assembled in dwil
CG5355	2L:1139		outside of SB and not annotated in dpse, dwil
CG5300	2L:1140		outside of SB and not annotated in dwil
CG5354	2L:1142		not annotated in Drosophila subgenus
CG5188	2L:1145	782	more complex explanation
CG5343	2L:1145	782	more complex explanation
CG5322	2L:1152	785	not annotated in Drosophila subgenus
CG6144	2L:1157		outside of SB and not assembled in dwil
CG13144	2L:1158		outside of SB and not assembled in dwil
CG7438	2L:1159		outside of SB and not assembled in dwil
CG7363	2L:1166	788	not annotated in Drosophila subgenus
CG17097	2L:1170	788	not annotated in Drosophila subgenus
CG17098	2L:1171	788	not annotated in Drosophila subgenus
CG31871	2L:1172	788	not annotated in Drosophila subgenus
CG17105	2L:1174	788	not annotated in Drosophila subgenus
CG17107	2L:1175	788	not annotated in Drosophila subgenus
CG7296	2L:1177	788	not annotated in Drosophila subgenus
CG7294	2L:1178	788	not annotated in Drosophila subgenus
CG6737	2L:1188		not annotated in Drosophila subgenus
CG18561	2L:1196	793	not annotated in Drosophila subgenus
CG6508	2L:1197	793	not annotated in Drosophila subgenus
CG17134	2L:1197	793	not annotated in Drosophila subgenus
CG6620	2L:1204	794	more complex explanation
CG14072	2L:1212	795	not annotated in Drosophila subgenus
CG4621	2L:1214		more complex explanation
CG16743	2L:1215		not annotated in Drosophila subgenus
CG6093	2L:1216		outside of SB and not annotated in dpse, dmoj
CG16834	2L:1222	796	not annotated in Drosophila subgenus
CG4579	2L:1224		outside of SB and not annotated in dpse
CG16840	2L:1224		outside of SB and not annotated in dpse
CG4584	2L:1225		outside of SB and not assembled in dwil
CG18666	2L:1226	797	not annotated in Drosophila subgenus
CG14914	2L:1227	797	not annotated in Drosophila subgenus
CG6392	2L:1247	801	not annotated in Drosophila subgenus
CG14926	2L:1252	801	not annotated in Drosophila subgenus
CG4922	2L:1255	801	not annotated in Drosophila subgenus
CG14928	2L:1257		outside of SB and not assembled in dwil
CG6509	2L:1258		outside of SB and not assembled in dwil
CG4970	2L:1259		not annotated in Drosophila subgenus
CG14929	2L:1259		not annotated in Drosophila subgenus
CG14930	2L:1259		not annotated in Drosophila subgenus
CG6541	2L:1262	802	not annotated in Drosophila subgenus
CG15841	2L:1263	802	not annotated in Drosophila subgenus
CG6555	2L:1263	802	not annotated in Drosophila subgenus
CG6589	2L:1264	802	not annotated in Drosophila subgenus
CG12307	2L:1267	802	not annotated in Drosophila subgenus
CG4988	2L:1269	802	not annotated in Drosophila subgenus
CG14932	2L:1272	803	not annotated in Drosophila subgenus
CG16960	2L:1280	805	not annotated in Drosophila subgenus
CG16961	2L:1281	805	not annotated in Drosophila subgenus
CG16964	2L:1284		not annotated in Drosophila subgenus
CG17745	2L:1285		not annotated in Drosophila subgenus
CG31864	2L:1293	807	not annotated in Drosophila subgenus
CG31865	2L:1294	807	not annotated in Drosophila subgenus
CG14945	2L:1304		outside of SB and not assembled in dwil
CG12317	2L:1304		outside of SB and not assembled in dwil
CG5317	2L:1305		outside of SB and not assembled in dwil
CG7061	2L:1306		outside of SB and not assembled in dwil
CG14946	2L:1307		outside of SB and not assembled in dwil
CG14947	2L:1308		outside of SB and not assembled in dwil
CG6716	2L:1309		outside of SB and not assembled in dwil
CG5325	2L:1310		outside of SB and not assembled in dwil
CG6712	2L:1310		outside of SB and not assembled in dwil
CG10692	2L:1311		outside of SB and not assembled in dwil
CG5336	2L:1312		outside of SB and not assembled in dwil
CG6618	2L:1312		outside of SB and not assembled in dwil
CG5353	2L:1313		outside of SB and not assembled in dwil
CG6601	2L:1314		outside of SB and not assembled in dwil
CG16996	2L:1315		outside of SB and not assembled in dwil
CG16997	2L:1316		not annotated in Drosophila subgenus
CG31861	2L:1320	813	not annotated in Drosophila subgenus
CG31759	2L:1324	814	more complex explanation
CG31862	2L:1325	814	more complex explanation
CG17010	2L:1326	814	not annotated in Drosophila subgenus
CG15494	2L:1332	815	not annotated in Drosophila subgenus
CG5418	2L:1338	815	not annotated in Drosophila subgenus
CG17024	2L:1339	815	not annotated in Drosophila subgenus
CG31859	2L:1342	815	not annotated in Drosophila subgenus
CG17031	2L:1343	815	not annotated in Drosophila subgenus
CG15488	2L:1344	815	not annotated in Drosophila subgenus
CG6153	2L:1348	816	not annotated in Drosophila subgenus
CG15484	2L:1353	818	not annotated in Drosophila subgenus
CG5983	2L:1360	820	not annotated in Drosophila subgenus
CG17174	2L:1361	820	not annotated in Drosophila subgenus
CG17176	2L:1362	820	not annotated in Drosophila subgenus
CG17178	2L:1363	820	not annotated in Drosophila subgenus
CG31856	2L:1373	820	not annotated in Drosophila subgenus
CG5142	2L:1374	820	more complex explanation
CG5122	2L:1375	820	not annotated in Drosophila subgenus
CG9928	2L:1376	820	not annotated in Drosophila subgenus
CG16978	2L:1377	820	not annotated in Drosophila subgenus
CG9431	2L:1388		not annotated in Drosophila subgenus
CG5648	2L:1395	824	not annotated in Drosophila subgenus
CG10859	2L:1425	829	not annotated in Drosophila subgenus
CG16954	2L:1432	829	not annotated in Drosophila subgenus
CG31846	2L:1434	829	not annotated in Drosophila subgenus
CG9254	2L:1437	831	not annotated in Drosophila subgenus
CG31845	2L:1445	832	not annotated in Drosophila subgenus
CG16888	2L:1452		not annotated in Drosophila subgenus
CG16870	2L:1463		not annotated in Drosophila subgenus
CG31770	2L:1471	838	not annotated in Drosophila subgenus
CG8864	2L:1473	838	not annotated in Drosophila subgenus
CG33681	2L:1476	838	not annotated in Drosophila subgenus
CG31840	2L:1477	838	not annotated in Drosophila subgenus
CG31771	2L:1480	838	not annotated in Drosophila subgenus
CG32973	2L:1483	838	not annotated in Drosophila subgenus
CG31769	2L:1486	838	not annotated in Drosophila subgenus
CG15292	2L:1487	838	not annotated in Drosophila subgenus
CG32971	2L:1491	838	not annotated in Drosophila subgenus
CG18125	2L:1494	840	not annotated in Drosophila subgenus
CG3478	2L:1501		not annotated in Drosophila subgenus
CG33648	2L:1507	842	not annotated in Drosophila subgenus
CG3473	2L:1509		not annotated in Drosophila subgenus
CG12636	2L:1512	844	not annotated in Drosophila subgenus
CG33482	2L:1513	844	not annotated in Drosophila subgenus
CG15281	2L:1516	844	not annotated in Drosophila subgenus
CG4691	2L:1517	844	not annotated in Drosophila subgenus
CG4650	2L:1520	844	not annotated in Drosophila subgenus
CG18636	2L:1521	844	not annotated in Drosophila subgenus
CG18420	2L:1522	844	not annotated in Drosophila subgenus
CG33309	2L:1524	844	not annotated in Drosophila subgenus
CG3491	2L:1531	844	not annotated in Drosophila subgenus
CG31834	2L:1533	844	not annotated in Drosophila subgenus
CG31832	2L:1539	844	not annotated in Drosophila subgenus
CG33679	2L:1543		not annotated in Drosophila subgenus
CG15267	2L:1551		not annotated in Drosophila subgenus
CG3975	2L:1551		not annotated in Drosophila subgenus
CG31829	2L:1554	847	not annotated in Drosophila subgenus
CG15263	2L:1556	847	not annotated in Drosophila subgenus
CG31830	2L:1557	847	not annotated in Drosophila subgenus
CG15260	2L:1558	847	not annotated in Drosophila subgenus
CG31733	2L:1559	847	not annotated in Drosophila subgenus
CG31828	2L:1564	847	not annotated in Drosophila subgenus
CG31825	2L:1582	849	not annotated in Drosophila subgenus
CG18477	2L:1583	849	not annotated in Drosophila subgenus
CG18478	2L:1584	849	not annotated in Drosophila subgenus
CG33311	2L:1585	849	not annotated in Drosophila subgenus
CG31780	2L:1586	849	not annotated in Drosophila subgenus
CG31827	2L:1587	849	not annotated in Drosophila subgenus
CG4148	2L:1593	850	not annotated in Drosophila subgenus
CG18518	2L:1596	851	not annotated in Drosophila subgenus
CG7653	2L:1600	851	not annotated in Drosophila subgenus
CG18096	2L:1602	851	not annotated in Drosophila subgenus
CG13244	2L:1606	851	not annotated in Drosophila subgenus
CG31819	2L:1616	852	not annotated in Drosophila subgenus
CG17329	2L:1623	856	not annotated in Drosophila subgenus
CG4440	2L:1633		not annotated in Drosophila subgenus
CG31817	2L:1634		outside of SB and not annotated in dmoj, dgri
CG31818	2L:1635		outside of SB and not annotated in dmoj, dgri
CG31737	2L:1636		not annotated in Drosophila subgenus
CG4580	2L:1644		not annotated in Drosophila subgenus
CG4694	2L:1654		not annotated in Drosophila subgenus
CG31807	2L:1655	862	not annotated in Drosophila subgenus
CG33552	2L:1655	862	not annotated in Drosophila subgenus
CG31782	2L:1655	862	not annotated in Drosophila subgenus
CG33312	2L:1669	866	not annotated in Drosophila subgenus
CG31810	2L:1674	868	not annotated in Drosophila subgenus
CG31781	2L:1677		not annotated in Drosophila subgenus
CG31805	2L:1682	871	not annotated in Drosophila subgenus
CG12288	2L:1683	871	more complex explanation
CG6291	2L:1685	871	not annotated in Drosophila subgenus
CG15136	2L:1689		not annotated in Drosophila subgenus
CG12620	2L:1690		not annotated in Drosophila subgenus
CG31747	2L:1693	872	not annotated in Drosophila subgenus
CG31744	2L:1694	872	not annotated in Drosophila subgenus
CG31748	2L:1695	872	not annotated in Drosophila subgenus
CG31750	2L:1696	872	not annotated in Drosophila subgenus
CG31745	2L:1697	872	not annotated in Drosophila subgenus
CG31804	2L:1699		not annotated in Drosophila subgenus
CG33928	2L:1704	874	not annotated in Drosophila subgenus
CG6639	2L:1706	874	not annotated in Drosophila subgenus
CG18563	2L:1706	874	not annotated in Drosophila subgenus
CG15144	2L:1718	878	not annotated in Drosophila subgenus
CG15145	2L:1719	878	not annotated in Drosophila subgenus
CG5681	2L:1728	878	not annotated in Drosophila subgenus
CG31742	2L:1729	878	not annotated in Drosophila subgenus
CG5693	2L:1730	878	not annotated in Drosophila subgenus
CG15149	2L:1731	878	not annotated in Drosophila subgenus
CG15150	2L:1733	878	not annotated in Drosophila subgenus
CG5755	2L:1739	878	not annotated in Drosophila subgenus
CG31788	2L:1751	882	not annotated in Drosophila subgenus
CG31749	2L:1754	882	not annotated in Drosophila subgenus
CG10174	2L:1758		not annotated in Drosophila subgenus
CG31789	2L:1768	885	not annotated in Drosophila subgenus
CG31801	2L:1775		not annotated in Drosophila subgenus
CG15166	2L:1787	891	not annotated in Drosophila subgenus
CG31752	2L:1797		outside of SB and not annotated in dpse, dgri
CG10603	2L:1800	894	not annotated in Drosophila subgenus
CG15169	2L:1813	897	not annotated in Drosophila subgenus
CG31792	2L:1815		not annotated in Drosophila subgenus
CG31793	2L:1816		outside of SB and not annotated in dwil
CG10652	2L:1817		outside of SB and not annotated in dana, dpse
CG15171	2L:1818		not annotated in Drosophila subgenus
CG15172	2L:1819		not annotated in Drosophila subgenus
CG10700	2L:1833		not annotated in Drosophila subgenus
CG17568	2L:1844	906	not annotated in Drosophila subgenus
CG17567	2L:1845	906	not annotated in Drosophila subgenus
CG31797	2L:1849	906	not annotated in Drosophila subgenus
CG31796	2L:1850	906	not annotated in Drosophila subgenus
CG31798	2L:1859	906	more complex explanation
CG33532	2L:1860	906	not annotated in Drosophila subgenus
CG16771	2L:1861	906	more complex explanation
CG31699	2L:1866	908	not annotated in Drosophila subgenus
CG13079	2L:1886		not annotated in Drosophila subgenus
CG13962	2L:1905		not annotated in Drosophila subgenus
CG31691	2L:1907	918	not annotated in Drosophila subgenus
CG33117	2L:1907	918	not annotated in Drosophila subgenus
CG34051	2L:1910	918	not annotated in Drosophila subgenus
CG10680	2L:1913	918	not annotated in Drosophila subgenus
CG12508	2L:1916	918	not annotated in Drosophila subgenus
CG10659	2L:1918		not annotated in Drosophila subgenus
CG10730	2L:1922	920	not annotated in Drosophila subgenus
CG10651	2L:1929		not annotated in Drosophila subgenus
CG41071	2L:1930		not annotated in Drosophila subgenus
CG40463	2L:1930		not annotated in Drosophila subgenus
CG41073	2L:1931		not annotated in Drosophila subgenus
CG40169	2L:1932		outside of SB and not annotated in dmoj
CG40172	2L:1932		not annotated in Drosophila subgenus
CG40341	2L:1932		not annotated in Drosophila subgenus
CG17571	2L:1933		outside of SB and not annotated in dpse, dmoj
CG41072	2L:1934		not annotated in Drosophila subgenus
CG40174	2L:1934		not annotated in Drosophila subgenus
CG17570	2L:1935		outside of SB and not annotated in dpse, dmoj
CG40175	2L:1936		not annotated in Drosophila subgenus
CG40176	2L:1937		not annotated in Drosophila subgenus
CG11012	2L:1941	926	not annotated in Drosophila subgenus
CG11019	2L:1947	927	not annotated in Drosophila subgenus
CG18858	2L:1951		not annotated in Drosophila subgenus
CG2508	2L:1952		not annotated in Drosophila subgenus
CG2493	2L:1952		outside of SB and not annotated in dgri
CG34007	2L:1953		not annotated in Drosophila subgenus
CG15476	2L:1954		not annotated in Drosophila subgenus
CG15477	2L:1955		not annotated in Drosophila subgenus
CG31677	2L:1956		not annotated in Drosophila subgenus
CG15475	2L:1957		not annotated in Drosophila subgenus
CG17472	2L:1958		not annotated in Drosophila subgenus
CG31680	2L:1959		not annotated in Drosophila subgenus
CG18810	2L:1963	928	not annotated in Drosophila subgenus
CG1962	2L:1966	929	more complex explanation
CG33321	2L:1980	936	not annotated in Drosophila subgenus
CG33320	2L:1981	936	not annotated in Drosophila subgenus
CG14405	2L:1982	936	not annotated in Drosophila subgenus
CG9334	2L:1987	937	not annotated in Drosophila subgenus
CG14402	2L:1989	937	not annotated in Drosophila subgenus
CG14400	2L:1990	937	not annotated in Drosophila subgenus
CG33317	2L:1996	937	not annotated in Drosophila subgenus
CG9272	2L:1999		more complex explanation
CG9270	2L:2000		not annotated in Drosophila subgenus
CG9266	2L:2001		not annotated in Drosophila subgenus
CG9253	2L:2013		outside of SB and not assembled in dwil
CG9252	2L:2013		outside of SB and not assembled in dwil
CG1071	2L:2014		outside of SB and not assembled in dwil
CG9250	2L:2015		outside of SB and not assembled in dwil
CG9249	2L:2015		outside of SB and not assembled in dwil
CG9248	2L:2016		outside of SB and not assembled in dwil
CG9247	2L:2016		outside of SB and not assembled in dwil
CG9246	2L:2017		outside of SB and not assembled in dwil
CG9243	2L:2017		outside of SB and not assembled in dwil
CG9244	2L:2018		outside of SB and not assembled in dwil
CG31627	2L:2019		outside of SB and not assembled in dwil
CG9242	2L:2020		outside of SB and not assembled in dwil
CG9241	2L:2021		outside of SB and not assembled in dwil
CG14396	2L:2021		outside of SB and not assembled in dwil
CG31624	2L:2022		outside of SB and not annotated in dere, dyak and not assembled in dwil
CG31988	2L:2023		not annotated in Drosophila subgenus
CG2042	2L:2034	946	not annotated in Drosophila subgenus
CG33801	2L:2039		not annotated in Drosophila subgenus
CG33910	2L:2040		not annotated in Drosophila subgenus
CG33909	2L:2041		not annotated in Drosophila subgenus
CG33803	2L:2042		not annotated in Drosophila subgenus
CG31617	2L:2043		not annotated in Drosophila subgenus
CG17949	2L:2044		not annotated in Drosophila subgenus
CG31618	2L:2045		not annotated in Drosophila subgenus
CG31611	2L:2046		not annotated in Drosophila subgenus
CG31613	2L:2047		not annotated in Drosophila subgenus
CG33804	2L:2048		not annotated in Drosophila subgenus
CG33908	2L:2049		not annotated in Drosophila subgenus
CG33907	2L:2050		not annotated in Drosophila subgenus
CG33806	2L:2051		not annotated in Drosophila subgenus
CG33807	2L:2052		not annotated in Drosophila subgenus
CG33906	2L:2053		not annotated in Drosophila subgenus
CG33808	2L:2054		not annotated in Drosophila subgenus
CG33905	2L:2055		not annotated in Drosophila subgenus
CG33809	2L:2056		not annotated in Drosophila subgenus
CG33810	2L:2057		not annotated in Drosophila subgenus
CG33904	2L:2058		not annotated in Drosophila subgenus
CG33903	2L:2059		not annotated in Drosophila subgenus
CG33812	2L:2060		not annotated in Drosophila subgenus
CG33813	2L:2061		not annotated in Drosophila subgenus
CG33902	2L:2062		not annotated in Drosophila subgenus
CG33814	2L:2063		not annotated in Drosophila subgenus
CG33901	2L:2064		not annotated in Drosophila subgenus
CG33815	2L:2065		not annotated in Drosophila subgenus
CG33816	2L:2066		not annotated in Drosophila subgenus
CG33900	2L:2067		not annotated in Drosophila subgenus
CG33817	2L:2068		not annotated in Drosophila subgenus
CG33899	2L:2069		not annotated in Drosophila subgenus
CG33818	2L:2070		not annotated in Drosophila subgenus
CG33819	2L:2071		not annotated in Drosophila subgenus
CG33898	2L:2072		not annotated in Drosophila subgenus
CG33820	2L:2073		not annotated in Drosophila subgenus
CG33897	2L:2074		not annotated in Drosophila subgenus
CG33821	2L:2075		not annotated in Drosophila subgenus
CG33822	2L:2076		not annotated in Drosophila subgenus
CG33896	2L:2077		not annotated in Drosophila subgenus
CG33823	2L:2078		not annotated in Drosophila subgenus
CG33895	2L:2079		not annotated in Drosophila subgenus
CG33824	2L:2080		not annotated in Drosophila subgenus
CG33825	2L:2081		not annotated in Drosophila subgenus
CG33894	2L:2082		not annotated in Drosophila subgenus
CG33826	2L:2083		not annotated in Drosophila subgenus
CG33893	2L:2084		not annotated in Drosophila subgenus
CG33827	2L:2085		not annotated in Drosophila subgenus
CG33828	2L:2086		not annotated in Drosophila subgenus
CG33892	2L:2087		not annotated in Drosophila subgenus
CG33829	2L:2088		not annotated in Drosophila subgenus
CG33891	2L:2089		not annotated in Drosophila subgenus
CG33830	2L:2090		not annotated in Drosophila subgenus
CG33831	2L:2091		not annotated in Drosophila subgenus
CG33890	2L:2092		not annotated in Drosophila subgenus
CG33832	2L:2093		not annotated in Drosophila subgenus
CG33889	2L:2094		not annotated in Drosophila subgenus
CG33833	2L:2095		not annotated in Drosophila subgenus
CG33834	2L:2096		not annotated in Drosophila subgenus
CG33888	2L:2097		not annotated in Drosophila subgenus
CG33835	2L:2098		not annotated in Drosophila subgenus
CG33887	2L:2099		not annotated in Drosophila subgenus
CG33836	2L:2100		not annotated in Drosophila subgenus
CG33837	2L:2101		not annotated in Drosophila subgenus
CG33886	2L:2102		not annotated in Drosophila subgenus
CG33838	2L:2103		not annotated in Drosophila subgenus
CG33885	2L:2104		not annotated in Drosophila subgenus
CG33839	2L:2105		not annotated in Drosophila subgenus
CG33840	2L:2106		not annotated in Drosophila subgenus
CG33884	2L:2107		not annotated in Drosophila subgenus
CG33841	2L:2108		not annotated in Drosophila subgenus
CG33883	2L:2109		not annotated in Drosophila subgenus
CG33842	2L:2110		not annotated in Drosophila subgenus
CG33843	2L:2111		not annotated in Drosophila subgenus
CG33882	2L:2112		not annotated in Drosophila subgenus
CG33844	2L:2113		not annotated in Drosophila subgenus
CG33881	2L:2114		not annotated in Drosophila subgenus
CG33845	2L:2115		not annotated in Drosophila subgenus
CG33846	2L:2116		not annotated in Drosophila subgenus
CG33880	2L:2117		not annotated in Drosophila subgenus
CG33847	2L:2118		not annotated in Drosophila subgenus
CG33879	2L:2119		not annotated in Drosophila subgenus
CG33848	2L:2120		not annotated in Drosophila subgenus
CG33849	2L:2121		not annotated in Drosophila subgenus
CG33878	2L:2122		not annotated in Drosophila subgenus
CG33850	2L:2123		not annotated in Drosophila subgenus
CG33877	2L:2124		not annotated in Drosophila subgenus
CG33851	2L:2125		not annotated in Drosophila subgenus
CG33852	2L:2126		not annotated in Drosophila subgenus
CG33876	2L:2127		not annotated in Drosophila subgenus
CG33853	2L:2128		not annotated in Drosophila subgenus
CG33875	2L:2129		not annotated in Drosophila subgenus
CG33854	2L:2130		not annotated in Drosophila subgenus
CG33855	2L:2131		not annotated in Drosophila subgenus
CG33874	2L:2132		not annotated in Drosophila subgenus
CG33856	2L:2133		not annotated in Drosophila subgenus
CG33873	2L:2134		not annotated in Drosophila subgenus
CG33857	2L:2135		not annotated in Drosophila subgenus
CG33858	2L:2136		not annotated in Drosophila subgenus
CG33872	2L:2137		not annotated in Drosophila subgenus
CG33859	2L:2138		not annotated in Drosophila subgenus
CG33871	2L:2139		not annotated in Drosophila subgenus
CG33860	2L:2140		not annotated in Drosophila subgenus
CG33861	2L:2141		not annotated in Drosophila subgenus
CG33870	2L:2142		not annotated in Drosophila subgenus
CG33862	2L:2143		not annotated in Drosophila subgenus
CG33869	2L:2144		not annotated in Drosophila subgenus
CG33863	2L:2145		not annotated in Drosophila subgenus
CG33864	2L:2146		not annotated in Drosophila subgenus
CG33868	2L:2147		not annotated in Drosophila subgenus
CG33865	2L:2148		not annotated in Drosophila subgenus
CG33866	2L:2149		not annotated in Drosophila subgenus
CG11630	2L:2161	952	not annotated in Drosophila subgenus
CG31600	2L:2166	952	not annotated in Drosophila subgenus
CG2528	2L:2168	952	not annotated in Drosophila subgenus
CG31693	2L:2169	952	not annotated in Drosophila subgenus
CG31700	2L:2172	952	not annotated in Drosophila subgenus
CG31703	2L:2175	952	not annotated in Drosophila subgenus
CG10834	2L:2177	952	not annotated in Drosophila subgenus
CG3635	2L:2184	955	not annotated in Drosophila subgenus
CG3262	2L:2187		not annotated in Drosophila subgenus
CG12775	2L:2188		outside of SB and not annotated in dana
CG3278	2L:2189		outside of SB and not annotated in dana
CG16937	2L:2190		not annotated in Drosophila subgenus
CG17018	2L:2191		outside of SB and not annotated in dyak and not assembled in dana
CG33492	2R:0001		not annotated in Drosophila subgenus
CG2981	2R:0002		not annotated in Drosophila subgenus
CG3107	2R:0003		outside of SB and not annotated in dyak, dgri
CG2944	2R:0004		outside of SB and not annotated in dyak, dpse and not assembled in dana
CG3136	2R:0005		outside of SB and not annotated in dyak, dpse and not assembled in dana
CG33554	2R:0006		not annotated in Drosophila subgenus
CG2682	2R:0007		outside of SB and not annotated in dyak
CG10392	2R:0008		outside of SB and not annotated in dyak, dpse, dgri and not assembled in dana
CG10465	2R:0009		outside of SB and not annotated in dyak, dgri and not assembled in dana
CG10395	2R:0010		outside of SB and not annotated in dyak, dgri and not assembled in dana
CG30441	2R:0010		outside of SB and not annotated in dyak, dgri
CG10396	2R:0011		not annotated in Drosophila subgenus
CG33347	2R:0012		not annotated in Drosophila subgenus
CG10417	2R:0013		outside of SB and not annotated in dyak, dpse, dgri and not assembled in dana
CG30437	2R:0014		outside of SB and not annotated in dyak, dpse, dgri and not assembled in dana
CG32838	2R:0015		outside of SB and not annotated in dyak, dpse, dgri and not assembled in dana
CG30438	2R:0017	956	more complex explanation
CG12408	2R:0017	956	not annotated in Drosophila subgenus
CG17510	2R:0018	956	more complex explanation
CG17508	2R:0019	956	more complex explanation
CG11665	2R:0020	956	more complex explanation
CG1344	2R:0021	956	more complex explanation
CG8426	2R:0022	956	more complex explanation
CG1294	2R:0023	956	not annotated in Drosophila subgenus
CG8245	2R:0024	956	more complex explanation
CG11066	2R:0026		outside of SB and not annotated in dmoj
CG30436	2R:0039	960	not annotated in Drosophila subgenus
CG12551	2R:0040	960	not annotated in Drosophila subgenus
CG7882	2R:0042	960	more complex explanation
CG7863	2R:0048		not annotated in Drosophila subgenus
CG30432	2R:0063	965	not annotated in Drosophila subgenus
CG8335	2R:0064	965	not annotated in Drosophila subgenus
CG8330	2R:0068	966	not annotated in Drosophila subgenus
CG15233	2R:0071	967	not annotated in Drosophila subgenus
CG15234	2R:0072	967	not annotated in Drosophila subgenus
CG33919	2R:0074	967	not annotated in Drosophila subgenus
CG9445	2R:0108	976	not annotated in Drosophila subgenus
CG9454	2R:0112	977	not annotated in Drosophila subgenus
CG9455	2R:0113	977	not annotated in Drosophila subgenus
CG9456	2R:0113	977	not annotated in Drosophila subgenus
CG33348	2R:0117	978	not annotated in Drosophila subgenus
CG18816	2R:0121	979	not annotated in Drosophila subgenus
CG12842	2R:0130	980	not annotated in Drosophila subgenus
CG4485	2R:0142	980	not annotated in Drosophila subgenus
CG30385	2R:0150	980	not annotated in Drosophila subgenus
CG11112	2R:0164	984	not annotated in Drosophila subgenus
CG11113	2R:0164	984	not annotated in Drosophila subgenus
CG1701	2R:0165		not annotated in Drosophila subgenus
CG2140	2R:0185	993	more complex explanation
CG1598	2R:0185	993	more complex explanation
CG1339	2R:0195	996	not annotated in Drosophila subgenus
CG1941	2R:0205		not annotated in Drosophila subgenus
CG1942	2R:0206		not annotated in Drosophila subgenus
CG12825	2R:0212		not annotated in Drosophila subgenus
CG12824	2R:0213		not annotated in Drosophila subgenus
CG12055	2R:0214		not annotated in Drosophila subgenus
CG30383	2R:0220		outside of SB and not annotated in dpse, dwil, dgri
CG17853	2R:0230	1006	not annotated in Drosophila subgenus
CG2916	2R:0241	1010	not annotated in Drosophila subgenus
CG11196	2R:0246	1011	not annotated in Drosophila subgenus
CG8721	2R:0249	1011	not annotated in Drosophila subgenus
CG17977	2R:0254	1012	not annotated in Drosophila subgenus
CG17976	2R:0260	1013	not annotated in Drosophila subgenus
CG18316	2R:0264	1014	not annotated in Drosophila subgenus
CG30374	2R:0272		not annotated in Drosophila subgenus
CG8708	2R:0273		not annotated in Drosophila subgenus
CG14756	2R:0279		not annotated in Drosophila subgenus
CG30369	2R:0284	1019	not annotated in Drosophila subgenus
CG14759	2R:0285	1019	not annotated in Drosophila subgenus
CG12126	2R:0287	1019	not annotated in Drosophila subgenus
CG30358	2R:0291	1019	not annotated in Drosophila subgenus
CG30365	2R:0293	1019	not annotated in Drosophila subgenus
CG18449	2R:0298	1019	not annotated in Drosophila subgenus
CG8690	2R:0316	1020	not annotated in Drosophila subgenus
CG14754	2R:0318	1020	not annotated in Drosophila subgenus
CG12780	2R:0319	1020	not annotated in Drosophila subgenus
CG8687	2R:0320	1020	not annotated in Drosophila subgenus
CG8734	2R:0330		outside of SB and not annotated in dana
CG30353	2R:0333	1024	not annotated in Drosophila subgenus
CG30354	2R:0334	1024	more complex explanation
CG30355	2R:0334	1024	not annotated in Drosophila subgenus
CG14744	2R:0340	1025	not annotated in Drosophila subgenus
CG14746	2R:0341	1025	not annotated in Drosophila subgenus
CG30356	2R:0346	1026	not annotated in Drosophila subgenus
CG8746	2R:0348	1026	not annotated in Drosophila subgenus
CG13751	2R:0354	1028	not annotated in Drosophila subgenus
CG11778	2R:0387	1038	not annotated in Drosophila subgenus
CG8781	2R:0394	1041	more complex explanation
CG8788	2R:0399		not annotated in Drosophila subgenus
CG30345	2R:0403	1044	not annotated in Drosophila subgenus
CG13740	2R:0413	1049	not annotated in Drosophila subgenus
CG2063	2R:0417		outside of SB and not assembled in dana
CG1968	2R:0418		outside of SB and not assembled in dana
CG2072	2R:0418		more complex explanation
CG1978	2R:0421	1051	not annotated in Drosophila subgenus
CG12158	2R:0422	1051	not annotated in Drosophila subgenus
CG8799	2R:0424	1051	more complex explanation
CG8800	2R:0425	1051	more complex explanation
CG33774	2R:0427	1052	not annotated in Drosophila subgenus
CG13955	2R:0430		outside of SB and not annotated in dmoj, dgri
CG8806	2R:0431		not annotated in Drosophila subgenus
CG30005	2R:0463	1057	not annotated in Drosophila subgenus
CG30002	2R:0466	1058	not annotated in Drosophila subgenus
CG1773	2R:0467	1058	not annotated in Drosophila subgenus
CG33800	2R:0471	1058	not annotated in Drosophila subgenus
CG34033	2R:0477		outside of SB and not annotated in dmoj, dgri
CG30001	2R:0478		outside of SB and not annotated in dmoj
CG1663	2R:0481		not annotated in Drosophila subgenus
CG18446	2R:0489		not annotated in Drosophila subgenus
CG12744	2R:0490		not annotated in Drosophila subgenus
CG1472	2R:0491		not annotated in Drosophila subgenus
CG1513	2R:0492		not annotated in Drosophila subgenus
CG12923	2R:0492		not annotated in Drosophila subgenus
CG30008	2R:0492		not annotated in Drosophila subgenus
CG30007	2R:0493		outside of SB and not annotated in dpse, dgri
CG12133	2R:0499		outside of SB and not annotated in dpse, dwil, dmoj
CG18445	2R:0507		outside of SB and not annotated in dmoj
CG2292	2R:0510	1070	not annotated in Drosophila subgenus
CG12921	2R:0511	1071	more complex explanation
CG1380	2R:0514		not annotated in Drosophila subgenus
CG2275	2R:0516	1075	more complex explanation
CG12912	2R:0527	1079	not annotated in Drosophila subgenus
CG12907	2R:0538	1080	not annotated in Drosophila subgenus
CG12902	2R:0539	1080	not annotated in Drosophila subgenus
CG12906	2R:0541	1080	not annotated in Drosophila subgenus
CG33477	2R:0545	1080	not annotated in Drosophila subgenus
CG33476	2R:0546	1080	not annotated in Drosophila subgenus
CG33475	2R:0547	1080	not annotated in Drosophila subgenus
CG11765	2R:0549	1080	more complex explanation
CG11825	2R:0550	1080	not annotated in Drosophila subgenus
CG33474	2R:0551	1080	not annotated in Drosophila subgenus
CG30320	2R:0559		not annotated in Drosophila subgenus
CG30018	2R:0574	1086	not annotated in Drosophila subgenus
CG12324	2R:0582	1089	not annotated in Drosophila subgenus
CG30017	2R:0586	1091	not annotated in Drosophila subgenus
CG18004	2R:0590		outside of SB and not annotated in dgri
CG12346	2R:0591	1092	not annotated in Drosophila subgenus
CG13235	2R:0597	1093	not annotated in Drosophila subgenus
CG30490	2R:0598		not annotated in Drosophila subgenus
CG30489	2R:0599		not annotated in Drosophila subgenus
CG33503	2R:0600		not annotated in Drosophila subgenus
CG7737	2R:0608	1095	not annotated in Drosophila subgenus
CG30029	2R:0617	1096	not annotated in Drosophila subgenus
CG7738	2R:0618	1096	not annotated in Drosophila subgenus
CG13223	2R:0622	1096	not annotated in Drosophila subgenus
CG30027	2R:0627	1097	not annotated in Drosophila subgenus
CG30033	2R:0633	1097	not annotated in Drosophila subgenus
CG12350	2R:0641		not annotated in Drosophila subgenus
CG12388	2R:0642		not annotated in Drosophila subgenus
CG12387	2R:0643		not annotated in Drosophila subgenus
CG12386	2R:0644		not annotated in Drosophila subgenus
CG12385	2R:0645		not annotated in Drosophila subgenus
CG18444	2R:0646		not annotated in Drosophila subgenus
CG18681	2R:0647		not annotated in Drosophila subgenus
CG18211	2R:0648		not annotated in Drosophila subgenus
CG30028	2R:0649		not annotated in Drosophila subgenus
CG30031	2R:0650		not annotated in Drosophila subgenus
CG30025	2R:0651		not annotated in Drosophila subgenus
CG12351	2R:0652		not annotated in Drosophila subgenus
CG13202	2R:0652		not annotated in Drosophila subgenus
CG7754	2R:0653		not annotated in Drosophila subgenus
CG12384	2R:0654		not annotated in Drosophila subgenus
CG30026	2R:0666		not annotated in Drosophila subgenus
CG34054	2R:0667		not annotated in Drosophila subgenus
CG7763	2R:0668	1101	not annotated in Drosophila subgenus
CG30034	2R:0673	1102	not annotated in Drosophila subgenus
CG8234	2R:0679	1104	not annotated in Drosophila subgenus
CG12444	2R:0686	1106	not annotated in Drosophila subgenus
CG30036	2R:0703	1111	not annotated in Drosophila subgenus
CG30037	2R:0704	1111	not annotated in Drosophila subgenus
CG30039	2R:0717	1114	not annotated in Drosophila subgenus
CG18343	2R:0722		not annotated in Drosophila subgenus
CG8860	2R:0731		not annotated in Drosophila subgenus
CG17967	2R:0738	1118	not annotated in Drosophila subgenus
CG8856	2R:0739	1118	not annotated in Drosophila subgenus
CG13171	2R:0740	1118	not annotated in Drosophila subgenus
CG13169	2R:0743	1118	not annotated in Drosophila subgenus
CG13167	2R:0745	1118	not annotated in Drosophila subgenus
CG13162	2R:0759		outside of SB and not annotated in dwil, dgri
CG30047	2R:0760		outside of SB and not annotated in dwil
CG30049	2R:0761		outside of SB and not annotated in dwil
CG30043	2R:0762		outside of SB and not annotated in dwil
CG33013	2R:0763		outside of SB and not annotated in dwil
CG33012	2R:0764		outside of SB and not annotated in dwil
CG13159	2R:0766	1122	not annotated in Drosophila subgenus
CG30048	2R:0774	1122	not annotated in Drosophila subgenus
CG8525	2R:0784	1124	more complex explanation
CG13154	2R:0784	1124	more complex explanation
CG30334	2R:0787	1127	not annotated in Drosophila subgenus
CG8821	2R:0794		not annotated in Drosophila subgenus
CG8569	2R:0797		not annotated in Drosophila subgenus
CG30055	2R:0802	1132	not annotated in Drosophila subgenus
CG17760	2R:0806	1133	not annotated in Drosophila subgenus
CG18356	2R:0823	1139	not annotated in Drosophila subgenus
CG17580	2R:0830		not annotated in Drosophila subgenus
CG30486	2R:0835	1142	not annotated in Drosophila subgenus
CG3814	2R:0839	1143	not annotated in Drosophila subgenus
CG30487	2R:0848	1144	not annotated in Drosophila subgenus
CG33798	2R:0852	1145	not annotated in Drosophila subgenus
CG13325	2R:0857	1146	not annotated in Drosophila subgenus
CG15870	2R:0864	1149	not annotated in Drosophila subgenus
CG4016	2R:0866		outside of SB and not annotated in dmoj, dgri
CG33138	2R:0867		outside of SB and not assembled in dgri
CG33137	2R:0868		not annotated in Drosophila subgenus
CG17724	2R:0869		outside of SB and not assembled in dgri
CG32904	2R:0869		outside of SB and not assembled in dgri
CG33182	2R:0869		outside of SB and not assembled in dgri
CG4062	2R:0870		outside of SB and not assembled in dgri
CG4088	2R:0871		outside of SB and not assembled in dgri
CG4616	2R:0872		outside of SB and not assembled in dgri
CG30058	2R:0872		not annotated in Drosophila subgenus
CG12251	2R:0873		outside of SB and not assembled in dgri
CG4627	2R:0874		outside of SB and not assembled in dgri
CG4630	2R:0875		outside of SB and not assembled in dgri
CG12765	2R:0879		more complex explanation
CG4670	2R:0880		more complex explanation
CG4676	2R:0881		more complex explanation
CG4679	2R:0882		more complex explanation
CG4716	2R:0887	1153	not annotated in Drosophila subgenus
CG10799	2R:0888	1153	not annotated in Drosophila subgenus
CG18279	2R:0899		not annotated in Drosophila subgenus
CG18278	2R:0899		not annotated in Drosophila subgenus
CG33470	2R:0900		not annotated in Drosophila subgenus
CG30059	2R:0900		not annotated in Drosophila subgenus
CG30065	2R:0902	1154	not annotated in Drosophila subgenus
CG13334	2R:0919		not annotated in Drosophila subgenus
CG6209	2R:0925	1162	not annotated in Drosophila subgenus
CG30484	2R:0937	1162	not annotated in Drosophila subgenus
CG30485	2R:0938	1162	not annotated in Drosophila subgenus
CG6553	2R:0939		not annotated in Drosophila subgenus
CG6704	2R:0949		not annotated in Drosophila subgenus
CG30482	2R:0954		not annotated in Drosophila subgenus
CG8257	2R:0959	1173	more complex explanation
CG8323	2R:0962		not annotated in Drosophila subgenus
CG18327	2R:0963		not annotated in Drosophila subgenus
CG10102	2R:0990		not annotated in Drosophila subgenus
CG13941	2R:0990		not annotated in Drosophila subgenus
CG30075	2R:0997	1183	not annotated in Drosophila subgenus
CG17389	2R:1005	1185	not annotated in Drosophila subgenus
CG10131	2R:1021		not annotated in Drosophila subgenus
CG12862	2R:1022		not annotated in Drosophila subgenus
CG30477	2R:1023		not annotated in Drosophila subgenus
CG10139	2R:1024		not annotated in Drosophila subgenus
CG10143	2R:1025		not annotated in Drosophila subgenus
CG12861	2R:1026		not annotated in Drosophila subgenus
CG12860	2R:1027		not annotated in Drosophila subgenus
CG12866	2R:1028		not annotated in Drosophila subgenus
CG10145	2R:1029		not annotated in Drosophila subgenus
CG30479	2R:1029		not annotated in Drosophila subgenus
CG30480	2R:1029		not annotated in Drosophila subgenus
CG12865	2R:1030		not annotated in Drosophila subgenus
CG10816	2R:1032	1195	not annotated in Drosophila subgenus
CG12854	2R:1040		not annotated in Drosophila subgenus
CG10246	2R:1056	1199	not annotated in Drosophila subgenus
CG12853	2R:1063	1199	not annotated in Drosophila subgenus
CG30473	2R:1069	1202	not annotated in Drosophila subgenus
CG33467	2R:1070	1202	not annotated in Drosophila subgenus
CG8089	2R:1072		not annotated in Drosophila subgenus
CG30081	2R:1077	1203	not annotated in Drosophila subgenus
CG16827	2R:1082	1205	not annotated in Drosophila subgenus
CG8157	2R:1090	1206	not annotated in Drosophila subgenus
CG8160	2R:1091	1206	not annotated in Drosophila subgenus
CG8175	2R:1096	1208	not annotated in Drosophila subgenus
CG30472	2R:1098	1208	not annotated in Drosophila subgenus
CG12960	2R:1103	1208	not annotated in Drosophila subgenus
CG8200	2R:1115		more complex explanation
CG8203	2R:1116		more complex explanation
CG30466	2R:1117		more complex explanation
CG30465	2R:1119	1212	not annotated in Drosophila subgenus
CG8210	2R:1122	1212	not annotated in Drosophila subgenus
CG30091	2R:1123	1212	not annotated in Drosophila subgenus
CG30090	2R:1125		not annotated in Drosophila subgenus
CG30088	2R:1126		not annotated in Drosophila subgenus
CG30087	2R:1127		not annotated in Drosophila subgenus
CG33460	2R:1128		not annotated in Drosophila subgenus
CG33461	2R:1129		not annotated in Drosophila subgenus
CG33462	2R:1130		not annotated in Drosophila subgenus
CG30080	2R:1131		not annotated in Drosophila subgenus
CG30083	2R:1132		not annotated in Drosophila subgenus
CG30321	2R:1134	1213	not annotated in Drosophila subgenus
CG33465	2R:1135		not annotated in Drosophila subgenus
CG8246	2R:1136		outside of SB and not annotated in dmoj
CG8249	2R:1137		outside of SB and not annotated in dmoj
CG8253	2R:1138		outside of SB and not annotated in dmoj
CG33463	2R:1143	1216	not annotated in Drosophila subgenus
CG8320	2R:1154	1221	more complex explanation
CG8322	2R:1154	1221	more complex explanation
CG8395	2R:1156		outside of SB and not annotated in dwil
CG8397	2R:1156		outside of SB and not annotated in dwil
CG10734	2R:1173		not annotated in Drosophila subgenus
CG9068	2R:1198	1237	not annotated in Drosophila subgenus
CG15710	2R:1213		not annotated in Drosophila subgenus
CG30098	2R:1214		not annotated in Drosophila subgenus
CG15711	2R:1216	1241	not annotated in Drosophila subgenus
CG4398	2R:1218	1241	not annotated in Drosophila subgenus
CG33550	2R:1222	1241	not annotated in Drosophila subgenus
CG33524	2R:1223	1241	not annotated in Drosophila subgenus
CG33458	2R:1225	1241	not annotated in Drosophila subgenus
CG33459	2R:1226	1241	not annotated in Drosophila subgenus
CG4918	2R:1237		outside of SB and not annotated in dpse, dvir
CG8626	2R:1250	1244	not annotated in Drosophila subgenus
CG15616	2R:1251	1244	not annotated in Drosophila subgenus
CG8622	2R:1252	1244	not annotated in Drosophila subgenus
CG33530	2R:1253	1244	not annotated in Drosophila subgenus
CG5348	2R:1255		not annotated in Drosophila subgenus
CG5550	2R:1263		outside of SB and not annotated in dpse
CG6301	2R:1264		outside of SB and not annotated in dpse
CG8652	2R:1265		not annotated in Drosophila subgenus
CG5859	2R:1266		outside of SB and not annotated in dpse
CG8648	2R:1266		outside of SB and not annotated in dpse
CG5935	2R:1267		outside of SB and not annotated in dpse
CG8912	2R:1268		outside of SB and not annotated in dpse
CG9013	2R:1277	1248	not annotated in Drosophila subgenus
CG30461	2R:1283	1249	not annotated in Drosophila subgenus
CG18730	2R:1303	1257	not annotated in Drosophila subgenus
CG10956	2R:1304	1257	not annotated in Drosophila subgenus
CG17876	2R:1305	1257	not annotated in Drosophila subgenus
CG11400	2R:1308	1257	not annotated in Drosophila subgenus
CG15917	2R:1309	1257	not annotated in Drosophila subgenus
CG17287	2R:1312	1257	not annotated in Drosophila subgenus
CG10950	2R:1316	1257	not annotated in Drosophila subgenus
CG18469	2R:1317	1257	not annotated in Drosophila subgenus
CG12699	2R:1318	1257	not annotated in Drosophila subgenus
CG6536	2R:1329	1260	not annotated in Drosophila subgenus
CG6530	2R:1330	1260	not annotated in Drosophila subgenus
CG10764	2R:1331	1260	not annotated in Drosophila subgenus
CG14479	2R:1340	1261	not annotated in Drosophila subgenus
CG18186	2R:1360	1268	not annotated in Drosophila subgenus
CG30108	2R:1363	1269	not annotated in Drosophila subgenus
CG10934	2R:1371	1272	not annotated in Drosophila subgenus
CG12298	2R:1378	1277	more complex explanation
CG6385	2R:1381	1278	more complex explanation
CG30111	2R:1391	1279	not annotated in Drosophila subgenus
CG30323	2R:1392	1279	not annotated in Drosophila subgenus
CG30110	2R:1395	1281	not annotated in Drosophila subgenus
CG14494	2R:1398	1282	not annotated in Drosophila subgenus
CG14500	2R:1431	1294	not annotated in Drosophila subgenus
CG30114	2R:1432	1294	not annotated in Drosophila subgenus
CG18540	2R:1442	1294	not annotated in Drosophila subgenus
CG14505	2R:1443	1294	not annotated in Drosophila subgenus
CG14503	2R:1444	1294	not annotated in Drosophila subgenus
CG18107	2R:1447	1294	not annotated in Drosophila subgenus
CG16844	2R:1449	1294	not annotated in Drosophila subgenus
CG15065	2R:1451	1294	not annotated in Drosophila subgenus
CG15068	2R:1452	1294	not annotated in Drosophila subgenus
CG5164	2R:1455	1294	not annotated in Drosophila subgenus
CG17523	2R:1456	1294	not annotated in Drosophila subgenus
CG17524	2R:1457	1294	not annotated in Drosophila subgenus
CG17525	2R:1458	1294	not annotated in Drosophila subgenus
CG17527	2R:1459	1294	not annotated in Drosophila subgenus
CG30119	2R:1476	1297	not annotated in Drosophila subgenus
CG30332	2R:1479		not annotated in Drosophila subgenus
CG5345	2R:1484		outside of SB and not annotated in dpse, dwil
CG5482	2R:1485		outside of SB and not annotated in dgri
CG33724	2R:1487		not annotated in Drosophila subgenus
CG30121	2R:1496	1306	not annotated in Drosophila subgenus
CG15107	2R:1522	1310	not annotated in Drosophila subgenus
CG15115	2R:1528	1310	not annotated in Drosophila subgenus
CG15116	2R:1529	1310	not annotated in Drosophila subgenus
CG30125	2R:1531	1310	not annotated in Drosophila subgenus
CG33454	2R:1541	1313	not annotated in Drosophila subgenus
CG33453	2R:1542	1313	not annotated in Drosophila subgenus
CG10476	2R:1546	1313	not annotated in Drosophila subgenus
CG10474	2R:1547	1313	not annotated in Drosophila subgenus
CG18606	2R:1548	1313	not annotated in Drosophila subgenus
CG18607	2R:1549	1313	not annotated in Drosophila subgenus
CG7461	2R:1553		outside of SB and not annotated in dpse, dwil
CG7744	2R:1575		outside of SB and not annotated in dgri
CG30130	2R:1586	1324	not annotated in Drosophila subgenus
CG11018	2R:1592	1324	not annotated in Drosophila subgenus
CG30450	2R:1603	1324	not annotated in Drosophila subgenus
CG30448	2R:1609	1324	not annotated in Drosophila subgenus
CG30447	2R:1611	1324	not annotated in Drosophila subgenus
CG10822	2R:1612	1324	not annotated in Drosophila subgenus
CG16898	2R:1614	1324	not annotated in Drosophila subgenus
CG18416	2R:1617	1324	not annotated in Drosophila subgenus
CG11209	2R:1622		outside of SB and not annotated in dwil, dgri
CG16741	2R:1642	1335	not annotated in Drosophila subgenus
CG30142	2R:1647	1335	not annotated in Drosophila subgenus
CG30141	2R:1648	1335	not annotated in Drosophila subgenus
CG13428	2R:1656	1335	not annotated in Drosophila subgenus
CG30145	2R:1658	1335	not annotated in Drosophila subgenus
CG30150	2R:1659	1335	not annotated in Drosophila subgenus
CG30153	2R:1665	1338	not annotated in Drosophila subgenus
CG15231	2R:1691	1341	not annotated in Drosophila subgenus
CG10067	2R:1698	1341	not annotated in Drosophila subgenus
CG33704	2R:1699	1341	not annotated in Drosophila subgenus
CG3221	2R:1706	1344	more complex explanation
CG4038	2R:1725	1349	more complex explanation
CG30393	2R:1744	1352	not annotated in Drosophila subgenus
CG10505	2R:1748		outside of SB and not annotated in dvir, dmoj
CG30392	2R:1749		outside of SB and not annotated in dvir, dmoj
CG10071	2R:1751	1354	more complex explanation
CG9696	2R:1754	1357	more complex explanation
CG30282	2R:1765	1360	not annotated in Drosophila subgenus
CG30288	2R:1768		not annotated in Drosophila subgenus
CG30289	2R:1769		not annotated in Drosophila subgenus
CG30286	2R:1770		not annotated in Drosophila subgenus
CG30287	2R:1771		not annotated in Drosophila subgenus
CG33226	2R:1772		not annotated in Drosophila subgenus
CG30283	2R:1773		not annotated in Drosophila subgenus
CG33225	2R:1777	1361	not annotated in Drosophila subgenus
CG15675	2R:1789	1364	not annotated in Drosophila subgenus
CG15676	2R:1791		not annotated in Drosophila subgenus
CG30395	2R:1803	1368	not annotated in Drosophila subgenus
CG4021	2R:1804	1368	not annotated in Drosophila subgenus
CG9284	2R:1808	1368	not annotated in Drosophila subgenus
CG4372	2R:1813	1368	not annotated in Drosophila subgenus
CG13494	2R:1820	1368	not annotated in Drosophila subgenus
CG34029	2R:1823		not annotated in Drosophila subgenus
CG30396	2R:1827	1370	not annotated in Drosophila subgenus
CG10138	2R:1832	1370	not annotated in Drosophila subgenus
CG13504	2R:1845		not annotated in Drosophila subgenus
CG11170	2R:1848	1378	not annotated in Drosophila subgenus
CG30279	2R:1848	1378	not annotated in Drosophila subgenus
CG3290	2R:1852		not annotated in Drosophila subgenus
CG3264	2R:1853		not annotated in Drosophila subgenus
CG11291	2R:1854		not annotated in Drosophila subgenus
CG33200	2R:1871	1383	not annotated in Drosophila subgenus
CG11362	2R:1886	1391	not annotated in Drosophila subgenus
CG3927	2R:1888	1391	not annotated in Drosophila subgenus
CG3875	2R:1902	1396	not annotated in Drosophila subgenus
CG4250	2R:1909		outside of SB and not annotated in dgri
CG30267	2R:1923	1398	not annotated in Drosophila subgenus
CG13535	2R:1941	1401	not annotated in Drosophila subgenus
CG30187	2R:1950		not annotated in Drosophila subgenus
CG3788	2R:1953	1405	not annotated in Drosophila subgenus
CG13534	2R:1956	1405	not annotated in Drosophila subgenus
CG32835	2R:1957	1405	not annotated in Drosophila subgenus
CG13542	2R:1961		not annotated in Drosophila subgenus
CG2952	2R:1966		not annotated in Drosophila subgenus
CG3082	2R:1967		outside of SB and not annotated in dgri
CG9888	2R:1968		outside of SB and not annotated in dgri
CG30191	2R:1971	1408	not annotated in Drosophila subgenus
CG13538	2R:1973	1408	not annotated in Drosophila subgenus
CG9873	2R:1975	1408	not annotated in Drosophila subgenus
CG3219	2R:1978	1408	not annotated in Drosophila subgenus
CG3215	2R:1979	1408	not annotated in Drosophila subgenus
CG30192	2R:1980	1408	not annotated in Drosophila subgenus
CG13544	2R:1980	1408	not annotated in Drosophila subgenus
CG13539	2R:1986	1408	not annotated in Drosophila subgenus
CG9871	2R:1990	1408	not annotated in Drosophila subgenus
CG13540	2R:1992	1408	not annotated in Drosophila subgenus
CG13541	2R:1995	1408	not annotated in Drosophila subgenus
CG30416	2R:1998	1408	not annotated in Drosophila subgenus
CG30413	2R:2001	1408	not annotated in Drosophila subgenus
CG9875	2R:2005		not annotated in Drosophila subgenus
CG13551	2R:2008	1412	more complex explanation
CG9889	2R:2008	1412	not annotated in Drosophila subgenus
CG9891	2R:2008	1412	not annotated in Drosophila subgenus
CG30414	2R:2009	1412	not annotated in Drosophila subgenus
CG12227	2R:2016	1412	not annotated in Drosophila subgenus
CG13559	2R:2025	1412	not annotated in Drosophila subgenus
CG5372	2R:2035	1415	not annotated in Drosophila subgenus
CG30182	2R:2038	1415	not annotated in Drosophila subgenus
CG10332	2R:2039		not annotated in Drosophila subgenus
CG33706	2R:2039		not annotated in Drosophila subgenus
CG13560	2R:2056		not annotated in Drosophila subgenus
CG12491	2R:2057		not annotated in Drosophila subgenus
CG11300	2R:2058		not annotated in Drosophila subgenus
CG15800	2R:2060	1419	not annotated in Drosophila subgenus
CG30177	2R:2061	1419	not annotated in Drosophila subgenus
CG12752	2R:2064	1420	more complex explanation
CG5597	2R:2080	1426	not annotated in Drosophila subgenus
CG17658	2R:2083	1426	more complex explanation
CG13565	2R:2093	1426	not annotated in Drosophila subgenus
CG16783	2R:2094	1426	not annotated in Drosophila subgenus
CG3825	2R:2105		outside of SB and not annotated in dvir
CG3832	2R:2107		outside of SB and not annotated in dvir
CG30178	2R:2107		not annotated in Drosophila subgenus
CG4324	2R:2111		not annotated in Drosophila subgenus
CG11388	2R:2114		outside of SB and not annotated in dvir
CG3140	2R:2115		outside of SB and not annotated in dwil, dvir, dmoj
CG11390	2R:2116		outside of SB and not annotated in dvir, dmoj
CG30173	2R:2117		outside of SB and not annotated in dmoj
CG3163	2R:2118		outside of SB and not annotated in dmoj
CG4254	2R:2124		outside of SB and not annotated in dmoj, dgri
CG3988	2R:2125		not annotated in Drosophila subgenus
CG3182	2R:2126		not annotated in Drosophila subgenus
CG13568	2R:2126		outside of SB and not annotated in dpse, dmoj
CG13563	2R:2127		outside of SB and not annotated in dvir, dmoj
CG3186	2R:2128		not annotated in Drosophila subgenus
CG33149	2R:2134		not annotated in Drosophila subgenus
CG30174	2R:2135		outside of SB and not annotated in dvir
CG30179	2R:2136		not annotated in Drosophila subgenus
CG13564	2R:2138		not annotated in Drosophila subgenus
CG3253	2R:2144		outside of SB and not annotated in dmoj
CG13577	2R:2161	1453	not annotated in Drosophila subgenus
CG15873	2R:2176	1455	not annotated in Drosophila subgenus
CG13589	2R:2184	1455	not annotated in Drosophila subgenus
CG13590	2R:2185	1455	not annotated in Drosophila subgenus
CG13591	2R:2187	1455	not annotated in Drosophila subgenus
CG4612	2R:2192		outside of SB and not annotated in dmoj, dgri
CG13592	2R:2194	1456	not annotated in Drosophila subgenus
CG3650	2R:2240	1467	not annotated in Drosophila subgenus
CG15859	2R:2241	1467	not annotated in Drosophila subgenus
CG30420	2R:2242	1467	more complex explanation
CG30425	2R:2246	1468	not annotated in Drosophila subgenus
CG30424	2R:2257		not annotated in Drosophila subgenus
CG30430	2R:2270	1473	not annotated in Drosophila subgenus
CG2665	2R:2272	1473	not annotated in Drosophila subgenus
CG2668	2R:2273	1473	not annotated in Drosophila subgenus
CG6821	3L:0002	1476	not annotated in Drosophila subgenus
CG12483	3L:0004	1476	not annotated in Drosophila subgenus
CG33790	3L:0018	1482	more complex explanation
CG1220	3L:0018	1482	more complex explanation
CG17142	3L:0018	1482	more complex explanation
CG13877	3L:0018	1482	more complex explanation
CG16971	3L:0019		not annotated in Drosophila subgenus
CG33229	3L:0019		more complex explanation
CG34018	3L:0020		more complex explanation
CG32845	3L:0027	1485	not annotated in Drosophila subgenus
CG13883	3L:0031	1485	not annotated in Drosophila subgenus
CG7004	3L:0033		more complex explanation
CG32344	3L:0034		more complex explanation
CG32343	3L:0035		more complex explanation
CG1231	3L:0037		not annotated in Drosophila subgenus
CG13884	3L:0039	1488	not annotated in Drosophila subgenus
CG13891	3L:0042	1489	not annotated in Drosophila subgenus
CG13892	3L:0044	1490	not annotated in Drosophila subgenus
CG32345	3L:0050		not annotated in Drosophila subgenus
CG17129	3L:0055		not annotated in Drosophila subgenus
CG3217	3L:0063	1495	not annotated in Drosophila subgenus
CG13896	3L:0064	1495	not annotated in Drosophila subgenus
CG32341	3L:0067	1495	not annotated in Drosophila subgenus
CG13898	3L:0068	1495	not annotated in Drosophila subgenus
CG34057	3L:0081	1499	not annotated in Drosophila subgenus
CG9094	3L:0089	1501	not annotated in Drosophila subgenus
CG32334	3L:0090	1501	not annotated in Drosophila subgenus
CG32336	3L:0091	1501	not annotated in Drosophila subgenus
CG9120	3L:0095	1501	not annotated in Drosophila subgenus
CG32335	3L:0097		not annotated in Drosophila subgenus
CG32318	3L:0109		not annotated in Drosophila subgenus
CG32320	3L:0132	1512	not annotated in Drosophila subgenus
CG9168	3L:0133	1512	not annotated in Drosophila subgenus
CG1014	3L:0139	1512	not annotated in Drosophila subgenus
CG32331	3L:0139	1512	not annotated in Drosophila subgenus
CG32313	3L:0147		not annotated in Drosophila subgenus
CG1049	3L:0148		not annotated in Drosophila subgenus
CG18170	3L:0154	1518	not annotated in Drosophila subgenus
CG13927	3L:0156	1519	more complex explanation
CG13928	3L:0156	1519	more complex explanation
CG13932	3L:0172	1523	not annotated in Drosophila subgenus
CG18171	3L:0174	1524	not annotated in Drosophila subgenus
CG12035	3L:0174	1524	more complex explanation
CG8001	3L:0179	1526	more complex explanation
CG11815	3L:0209	1537	not annotated in Drosophila subgenus
CG32308	3L:0211	1537	not annotated in Drosophila subgenus
CG32305	3L:0227		outside of SB and not annotated in dvir, dgri
CG32304	3L:0233	1540	not annotated in Drosophila subgenus
CG13801	3L:0239	1540	not annotated in Drosophila subgenus
CG1262	3L:0268	1544	not annotated in Drosophila subgenus
CG1241	3L:0272		outside of SB and not annotated in dvir, dmoj
CG14952	3L:0276	1545	not annotated in Drosophila subgenus
CG9970	3L:0279	1545	not annotated in Drosophila subgenus
CG34025	3L:0281	1545	not annotated in Drosophila subgenus
CG2075	3L:0288		not annotated in Drosophila subgenus
CG32284	3L:0311	1554	not annotated in Drosophila subgenus
CG14957	3L:0312	1554	not annotated in Drosophila subgenus
CG14958	3L:0313	1554	not annotated in Drosophila subgenus
CG32275	3L:0325	1560	not annotated in Drosophila subgenus
CG17723	3L:0328		outside of SB and not annotated in dgri
CG32279	3L:0329		not annotated in Drosophila subgenus
CG32283	3L:0330		not annotated in Drosophila subgenus
CG32282	3L:0331		not annotated in Drosophila subgenus
CG10812	3L:0332		not annotated in Drosophila subgenus
CG12077	3L:0333		outside of SB and not annotated in dgri
CG32274	3L:0337		not annotated in Drosophila subgenus
CG32268	3L:0338		not annotated in Drosophila subgenus
CG10810	3L:0340		not annotated in Drosophila subgenus
CG12010	3L:0342	1565	not annotated in Drosophila subgenus
CG14974	3L:0356		not annotated in Drosophila subgenus
CG32263	3L:0363	1568	not annotated in Drosophila subgenus
CG10852	3L:0365	1569	not annotated in Drosophila subgenus
CG14975	3L:0366	1569	not annotated in Drosophila subgenus
CG32265	3L:0375	1572	not annotated in Drosophila subgenus
CG12766	3L:0377	1572	not annotated in Drosophila subgenus
CG14983	3L:0381	1573	not annotated in Drosophila subgenus
CG32261	3L:0388		not annotated in Drosophila subgenus
CG32254	3L:0396	1575	not annotated in Drosophila subgenus
CG32259	3L:0398	1575	not annotated in Drosophila subgenus
CG14990	3L:0402	1576	not annotated in Drosophila subgenus
CG15811	3L:0408	1578	more complex explanation
CG33764	3L:0430	1583	not annotated in Drosophila subgenus
CG32249	3L:0459	1589	not annotated in Drosophila subgenus
CG32243	3L:0471	1589	not annotated in Drosophila subgenus
CG33777	3L:0473	1589	not annotated in Drosophila subgenus
CG13719	3L:0474	1589	not annotated in Drosophila subgenus
CG32247	3L:0475	1589	not annotated in Drosophila subgenus
CG32246	3L:0475	1589	not annotated in Drosophila subgenus
CG12493	3L:0484	1589	not annotated in Drosophila subgenus
CG32235	3L:0491	1589	not annotated in Drosophila subgenus
CG32233	3L:0496	1589	not annotated in Drosophila subgenus
CG12027	3L:0499		not annotated in Drosophila subgenus
CG34047	3L:0500		not annotated in Drosophila subgenus
CG10677	3L:0511	1592	not annotated in Drosophila subgenus
CG10630	3L:0521		not annotated in Drosophila subgenus
CG10594	3L:0531	1597	not annotated in Drosophila subgenus
CG17795	3L:0536	1599	not annotated in Drosophila subgenus
CG5568	3L:0555	1606	not annotated in Drosophila subgenus
CG18586	3L:0556	1606	not annotated in Drosophila subgenus
CG13291	3L:0570	1608	not annotated in Drosophila subgenus
CG10478	3L:0572	1608	not annotated in Drosophila subgenus
CG10533	3L:0597	1611	not annotated in Drosophila subgenus
CG8219	3L:0618	1614	not annotated in Drosophila subgenus
CG32401	3L:0626	1615	not annotated in Drosophila subgenus
CG32402	3L:0627	1615	not annotated in Drosophila subgenus
CG32399	3L:0630	1615	not annotated in Drosophila subgenus
CG32398	3L:0631	1615	not annotated in Drosophila subgenus
CG32396	3L:0637	1618	not annotated in Drosophila subgenus
CG33280	3L:0643		not annotated in Drosophila subgenus
CG32395	3L:0645	1620	not annotated in Drosophila subgenus
CG18156	3L:0662	1622	not annotated in Drosophila subgenus
CG32388	3L:0665	1622	not annotated in Drosophila subgenus
CG32391	3L:0671	1623	not annotated in Drosophila subgenus
CG34030	3L:0672	1623	not annotated in Drosophila subgenus
CG8620	3L:0685		not annotated in Drosophila subgenus
CG8588	3L:0708		not annotated in Drosophila subgenus
CG14835	3L:0720	1634	not annotated in Drosophila subgenus
CG32383	3L:0721	1634	not annotated in Drosophila subgenus
CG32382	3L:0722	1634	not annotated in Drosophila subgenus
CG16992	3L:0730	1634	not annotated in Drosophila subgenus
CG16998	3L:0738	1634	not annotated in Drosophila subgenus
CG32374	3L:0739	1634	not annotated in Drosophila subgenus
CG7526	3L:0742	1634	more complex explanation
CG32373	3L:0748	1636	more complex explanation
CG32371	3L:0750	1637	not annotated in Drosophila subgenus
CG32368	3L:0758		not annotated in Drosophila subgenus
CG7498	3L:0782	1644	not annotated in Drosophila subgenus
CG7476	3L:0786	1645	not annotated in Drosophila subgenus
CG8012	3L:0795	1647	not annotated in Drosophila subgenus
CG13673	3L:0800	1647	not annotated in Drosophila subgenus
CG7194	3L:0806		not annotated in Drosophila subgenus
CG7118	3L:0821	1652	not annotated in Drosophila subgenus
CG7170	3L:0822	1652	not annotated in Drosophila subgenus
CG6915	3L:0831		more complex explanation
CG6902	3L:0832		outside of SB and not annotated in dwil, dgri
CG6817	3L:0838		outside of SB and not assembled in dgri
CG6519	3L:0858	1660	not annotated in Drosophila subgenus
CG32024	3L:0869	1660	not annotated in Drosophila subgenus
CG32033	3L:0878	1661	not annotated in Drosophila subgenus
CG5653	3L:0883		not annotated in Drosophila subgenus
CG4476	3L:0912	1669	not annotated in Drosophila subgenus
CG4477	3L:0914	1669	not annotated in Drosophila subgenus
CG4035	3L:0930		not annotated in Drosophila subgenus
CG33926	3L:0939		not annotated in Drosophila subgenus
CG12526	3L:0957	1682	not annotated in Drosophila subgenus
CG3088	3L:0962	1682	not annotated in Drosophila subgenus
CG3335	3L:0966	1682	more complex explanation
CG14167	3L:0988	1686	not annotated in Drosophila subgenus
CG33273	3L:0991	1686	not annotated in Drosophila subgenus
CG10572	3L:0993		outside of SB and not annotated in dgri
CG6721	3L:0994		outside of SB and not annotated in dgri
CG6559	3L:1025	1691	not annotated in Drosophila subgenus
CG32060	3L:1027	1691	not annotated in Drosophila subgenus
CG32065	3L:1030	1691	not annotated in Drosophila subgenus
CG6527	3L:1035	1691	not annotated in Drosophila subgenus
CG18628	3L:1040	1691	not annotated in Drosophila subgenus
CG14154	3L:1041	1691	not annotated in Drosophila subgenus
CG12523	3L:1049		outside of SB and not annotated in dpse, dgri
CG7958	3L:1050		outside of SB and not annotated in dgri
CG6418	3L:1051		outside of SB and not annotated in dgri
CG14149	3L:1052		outside of SB and not annotated in dgri
CG6409	3L:1053		outside of SB and not annotated in dmoj, dgri
CG7949	3L:1054		outside of SB and not annotated in dgri
CG6404	3L:1055		outside of SB and not annotated in dgri
CG7941	3L:1056		not annotated in Drosophila subgenus
CG18349	3L:1057		not annotated in Drosophila subgenus
CG18348	3L:1058		not annotated in Drosophila subgenus
CG14148	3L:1060	1694	not annotated in Drosophila subgenus
CG32070	3L:1062	1694	not annotated in Drosophila subgenus
CG7923	3L:1066	1694	not annotated in Drosophila subgenus
CG11801	3L:1083		not annotated in Drosophila subgenus
CG32072	3L:1084		not annotated in Drosophila subgenus
CG32071	3L:1085		not annotated in Drosophila subgenus
CG32073	3L:1086		not annotated in Drosophila subgenus
CG12522	3L:1087		not annotated in Drosophila subgenus
CG34012	3L:1088		not annotated in Drosophila subgenus
CG32077	3L:1093	1701	not annotated in Drosophila subgenus
CG32074	3L:1093	1701	not annotated in Drosophila subgenus
CG14143	3L:1094	1701	not annotated in Drosophila subgenus
CG32083	3L:1106	1704	not annotated in Drosophila subgenus
CG7573	3L:1108	1704	not annotated in Drosophila subgenus
CG6168	3L:1109	1704	not annotated in Drosophila subgenus
CG11726	3L:1111	1704	not annotated in Drosophila subgenus
CG6140	3L:1117	1704	not annotated in Drosophila subgenus
[truncated: 938 more rows]
